# Supplementary material for: An Immune Signature for Risk Stratification and Therapeutic Prediction in Helicobacter pylori-Infected Gastric Cancer
Source: Cancers (Basel). 2022 Jul 4;14(13):3276. doi: 10.3390/cancers14133276 (PMC9265823; doi:10.3390/cancers14133276)
Supplement: Supplementary file 1 [file cancers-14-03276-s001.zip › supplement tables.xlsx]

## Sheet: Supplement Table S1
Supplement Table S1: Hallmark pathways identified by GO enrichment analysis and KEGG pathway analysis based on IRGs in immune-related modules
ID	Description	GeneRatio	BgRatio	pvalue	p.adjust	qvalue	geneID	Count	Type
GO:0019221	cytokine-mediated signaling pathway	90/247	472/18723	9.3e-81	3.19e-77	1.91e-77	CD4/CD74/IFNG/CXCL10/CXCL9/CXCL11/CXCL13/XCL1/CCR10/TMSB4X/STAT1/SOCS1/IRF1/IL15/CCL5/CYLD/IRF5/CCR6/IL12B/IL7R/CCL19/CCL17/CCR7/CCR8/CCL21/CCR5/CXCR4/CXCR6/CCR4/JAK2/TXK/SYK/PTPN6/CX3CL1/CMKLR1/CX3CR1/CXCR3/CXCR5/XCR1/CSF1/EBI3/TNFSF13B/CSF1R/CSF2RB/FLT3/IL10RA/IL12RB1/IL2RB/IL18R1/IL21R/IL22RA2/IL27RA/IL2RG/IL5RA/IL6R/TNFRSF17/TNFRSF18/FAS/PTPRC/FCER1G/CCL13/CCL8/IFNAR1/STAT3/CCL4/JAK1/IFNAR2/T…	90	biological process
GO:0042110	T cell activation	71/247	487/18723	3.89e-54	6.67e-51	3.99e-51	B2M/CD1C/CD1D/CD4/CD8A/CD74/MR1/IFNG/MICB/XCL1/SOCS1/IRF1/IL15/CCL5/CCR6/IL12B/IL7R/CD40LG/PIK3CG/ARG2/VCAM1/CCL19/CCR7/CCL21/SYK/VAV1/RAC2/PIK3CD/PTPN6/FCGR2B/SEMA4A/EBI3/TNFSF13B/TNFSF8/IL12RB1/IL18R1/IL27RA/IL6R/PTGER4/ITGAL/LCK/ZAP70/LAT/CD48/CD3D/CD3E/CD3G/PTPRC/ITK/CD28/ICOS/CTLA4/RASGRP1/PRKCQ/CTSL/FCER1G/ICAM1/RELB/NOD2/STAT3/PRDX2/TNFSF4/IL10/CD86/MALT1/TNFSF14/IL2RA/TNFRSF1B/TNFRSF4/NCK…	71	biological process
GO:0070661	leukocyte proliferation	60/247	318/18723	2.44e-52	2.79e-49	1.67e-49	CD1D/CD74/XCL1/IRF1/IL15/CD40/CCL5/IL12B/IL7R/CD40LG/PIK3CG/ARG2/VCAM1/CCL19/PTK2/CD79A/SYK/BTK/RAC2/NFATC2/CD19/CR2/INPP5D/CD22/PTPN6/FCGR2B/CX3CL1/CSF1/EBI3/TNFSF13B/TNFSF8/CSF1R/FLT3/IL12RB1/IL27RA/IL5RA/TNFRSF13B/ZAP70/CD3E/PTPRC/CD28/CTLA4/RASGRP1/PRKCQ/CCL8/TLR4/MAPK1/PRDX2/TBK1/TNFSF4/IL10/CD86/MALT1/TNFSF14/IL2RA/MPL/TNFRSF1B/TNFRSF4/TYROBP/NCK1	60	biological process
GO:0032103	positive regulation of response to external stimulus	65/247	427/18723	1.39e-50	1.19e-47	7.12e-48	CD1D/CD74/IFNG/KIR2DL4/LTA/CXCL10/CXCL13/XCL1/TMSB4X/TLR3/IL15/TLR7/CCL5/CCR6/IL12B/PIK3CG/CCL19/CCR7/CCL21/CXCR4/CCR4/JAK2/PTK2/TXK/SYK/BTK/VAV1/RAC2/PLCG2/CX3CL1/CMKLR1/CX3CR1/CSF1/IL16/CSF1R/IL6R/PTGER4/NCR3/SH2D1B/SH2D1A/CD28/RASGRP1/KLRD1/LGMN/RAET1E/TGFB1/TLR4/NOD2/TLR2/MAPK1/TLR8/GRN/CCL4/TBK1/TNFSF4/CCL26/CCR1/HCK/EDN3/C5AR1/C3AR1/IL17RA/IL18RAP/OSMR/TYROBP	65	biological process
GO:0060326	cell chemotaxis	58/247	310/18723	2.55e-50	1.75e-47	1.05e-47	CD74/CXCL10/CXCL9/CXCL11/CXCL13/XCL1/CCR10/TMSB4X/CCL5/CCR6/PIK3CG/VCAM1/CCL19/CCL17/CCR7/CCR8/CCL21/CCR5/CXCR4/CXCR6/CCR4/PTK2/SYK/VAV1/RAC2/PIK3CD/CX3CL1/CMKLR1/CX3CR1/CXCR3/CXCR5/XCR1/CSF1/IL16/CSF1R/IL6R/PRKCQ/FCER1G/LGMN/CCL13/CCL8/NOD2/MAPK1/CCL4/CCL16/CCL18/CCL26/CCL22/CCR3/CCL23/CCR1/IL10/EDN3/C5AR1/CCRL2/C5AR2/C3AR1/ITGB2	58	biological process
GO:0002443	leukocyte mediated immunity	65/247	440/18723	1.01e-49	5.76e-47	3.44e-47	B2M/CD1A/CD1B/CD1C/CD1D/CD1E/CD8A/CD74/MR1/KIR2DL4/LTA/XCL1/PTGDS/TLR3/CD40/CCR6/IL12B/IL7R/CD40LG/PIK3CG/SYK/BTK/VAV1/RAC2/CD19/CR2/PIK3CD/INPP5D/PTPN6/FCGR2B/PLCG2/CX3CR1/IL12RB1/IL18R1/IL27RA/NCR1/NCR3/LAT/SH2D1B/SH2D1A/GZMB/PRF1/PTPRC/CD28/RASGRP1/FCER1G/ICAM1/KLRD1/RAET1E/TGFB1/TLR4/NOD2/TLR8/HMOX1/TNFSF4/IL10/FGR/PTGDR/MALT1/PTAFR/IL18RAP/TNFRSF1B/ITGB2/TYROBP/CBL	65	biological process
GO:0050900	leukocyte migration	61/247	369/18723	1.37e-49	6.7e-47	4.01e-47	CD74/CXCL10/CXCL9/CXCL11/CXCL13/XCL1/CCL5/CCR6/PIK3CG/VCAM1/CCL19/CCL17/CCR7/CCL21/CCR5/CXCR4/PTK2/SYK/VAV1/RAC2/PIK3CD/CX3CL1/CMKLR1/CX3CR1/CXCR3/CXCR5/CSF1/IL16/CSF1R/IL27RA/IL6R/PTGER4/TNFRSF18/ITGAL/LCK/ZAP70/FCER1G/ICAM1/LGMN/CCL13/CCL8/MMP9/NOD2/MAPK1/CCL4/HMOX1/CCL16/CCL18/CCL26/CCL22/CCL23/CCR1/IL10/HCK/EDN3/C5AR1/C5AR2/PTAFR/C3AR1/ITGB2/RHOA	61	biological process
GO:0001819	positive regulation of cytokine production	65/247	467/18723	5.02e-48	2.06e-45	1.23e-45	B2M/CD4/CD74/IFNG/KIR2DL4/LTA/XCL1/TLR3/STAT1/IRF1/IL15/CD40/TLR7/IRF5/IL12B/CD40LG/PIK3CG/CCL19/CCR7/JAK2/TXK/SYK/PIK3CD/PLCG2/CX3CL1/EBI3/IL16/LTB/CSF1R/IL12RB1/IL18R1/IL27RA/IL6R/PTGER4/CD244/CD3E/PTPRC/ITK/CD28/RASGRP1/PRKCQ/FCER1G/TGFB1/TLR4/NOD2/TLR2/CYBB/STAT3/F2R/TLR8/TLR1/CD14/HMOX1/TBK1/TNFSF4/IL10/FGR/CD86/MALT1/C5AR1/PTAFR/C3AR1/IL12RB2/IL17RA/TYROBP	65	biological process
GO:0002697	regulation of immune effector process	58/247	339/18723	5.71e-48	2.06e-45	1.23e-45	B2M/CD1A/CD1B/CD1C/CD1D/CD1E/CD74/MR1/IFNG/KIR2DL4/LTA/XCL1/TLR3/CD40/IL12B/IL7R/CD40LG/CCL19/SYK/BTK/VAV1/RAC2/CR2/CD22/PTPN6/FCGR2B/PLCG2/CX3CR1/IL12RB1/IL18R1/IL27RA/NCR1/NCR3/CD244/SH2D1B/SH2D1A/PTPRC/CD28/RASGRP1/ICAM1/KLRD1/RAET1E/TGFB1/TLR4/NOD2/GRN/HMOX1/TNFSF4/IL10/FGR/CD86/MALT1/PTAFR/IL18RAP/TNFRSF1B/TNFRSF4/ITGB2/TYROBP	58	biological process
GO:0030098	lymphocyte differentiation	60/247	374/18723	6.02e-48	2.06e-45	1.23e-45	B2M/CD1D/CD4/CD8A/CD74/MR1/IFNG/SOCS1/IRF1/IL15/CCR6/IL12B/IL7R/CD40LG/VCAM1/CCL19/CCR7/CD79A/CD79B/SYK/BTK/VAV1/CD19/CR2/PIK3CD/INPP5D/PTPN6/FCGR2B/PLCG2/SEMA4A/CMTM7/TNFSF13B/TNFSF8/FLT3/IL12RB1/IL18R1/IL6R/PTGER4/LCK/ZAP70/CD3D/CD3E/CD3G/PTPRC/ITK/CD28/CTLA4/RASGRP1/CTSL/FCER1G/RELB/STAT3/PRDX2/TNFSF4/IL10/CD86/MALT1/INHBA/IL2RA/RHOA	60	biological process
GO:1903131	mononuclear cell differentiation	62/247	426/18723	6.25e-47	1.95e-44	1.16e-44	B2M/CD1D/CD4/CD8A/CD74/MR1/IFNG/SOCS1/IRF1/IL15/CCR6/IL12B/IL7R/CD40LG/VCAM1/CCL19/CCR7/CD79A/CD79B/SYK/BTK/VAV1/CD19/CR2/PIK3CD/INPP5D/PTPN6/FCGR2B/PLCG2/SEMA4A/CMTM7/CSF1/TNFSF13B/TNFSF8/CSF1R/FLT3/IL12RB1/IL18R1/IL6R/PTGER4/LCK/ZAP70/CD3D/CD3E/CD3G/PTPRC/ITK/CD28/CTLA4/RASGRP1/CTSL/FCER1G/RELB/STAT3/PRDX2/TNFSF4/IL10/CD86/MALT1/INHBA/IL2RA/RHOA	62	biological process
GO:0032943	mononuclear cell proliferation	54/247	291/18723	1.45e-46	4.14e-44	2.47e-44	CD1D/CD74/XCL1/IRF1/IL15/CD40/CCL5/IL12B/IL7R/CD40LG/PIK3CG/ARG2/VCAM1/CCL19/CD79A/SYK/BTK/RAC2/NFATC2/CD19/CR2/INPP5D/CD22/PTPN6/FCGR2B/CSF1/EBI3/TNFSF13B/TNFSF8/FLT3/IL12RB1/IL27RA/TNFRSF13B/ZAP70/CD3E/PTPRC/CD28/CTLA4/RASGRP1/PRKCQ/TLR4/PRDX2/TBK1/TNFSF4/IL10/CD86/MALT1/TNFSF14/IL2RA/MPL/TNFRSF1B/TNFRSF4/TYROBP/NCK1	54	biological process
GO:0002703	regulation of leukocyte mediated immunity	49/247	226/18723	1.06e-45	2.79e-43	1.67e-43	B2M/CD1A/CD1B/CD1C/CD1D/CD1E/MR1/KIR2DL4/LTA/XCL1/TLR3/CD40/IL12B/IL7R/SYK/BTK/VAV1/RAC2/CR2/PTPN6/FCGR2B/PLCG2/CX3CR1/IL12RB1/IL18R1/IL27RA/NCR1/NCR3/SH2D1B/SH2D1A/PTPRC/CD28/RASGRP1/ICAM1/KLRD1/RAET1E/TGFB1/TLR4/NOD2/HMOX1/TNFSF4/IL10/FGR/MALT1/PTAFR/IL18RAP/TNFRSF1B/ITGB2/TYROBP	49	biological process
GO:0046651	lymphocyte proliferation	53/247	288/18723	1.74e-45	4.26e-43	2.55e-43	CD1D/CD74/XCL1/IRF1/IL15/CD40/CCL5/IL12B/IL7R/CD40LG/PIK3CG/ARG2/VCAM1/CCL19/CD79A/SYK/BTK/RAC2/NFATC2/CD19/CR2/INPP5D/CD22/PTPN6/FCGR2B/EBI3/TNFSF13B/TNFSF8/FLT3/IL12RB1/IL27RA/TNFRSF13B/ZAP70/CD3E/PTPRC/CD28/CTLA4/RASGRP1/PRKCQ/TLR4/PRDX2/TBK1/TNFSF4/IL10/CD86/MALT1/TNFSF14/IL2RA/MPL/TNFRSF1B/TNFRSF4/TYROBP/NCK1	53	biological process
GO:0030595	leukocyte chemotaxis	48/247	230/18723	6.6e-44	1.51e-41	9.01e-42	CD74/CXCL10/CXCL9/CXCL11/CXCL13/XCL1/CCL5/CCR6/PIK3CG/CCL19/CCL17/CCR7/CCL21/CCR5/CXCR4/PTK2/SYK/VAV1/RAC2/PIK3CD/CX3CL1/CMKLR1/CX3CR1/CXCR3/CXCR5/CSF1/IL16/CSF1R/IL6R/FCER1G/LGMN/CCL13/CCL8/NOD2/MAPK1/CCL4/CCL16/CCL18/CCL26/CCL22/CCL23/CCR1/IL10/EDN3/C5AR1/C5AR2/C3AR1/ITGB2	48	biological process
GO:0070098	chemokine-mediated signaling pathway	35/247	88/18723	3.12e-43	6.68e-41	4e-41	CXCL10/CXCL9/CXCL11/CXCL13/XCL1/CCR10/CCL5/CCR6/CCL19/CCL17/CCR7/CCR8/CCL21/CCR5/CXCR4/CXCR6/CCR4/CX3CL1/CMKLR1/CX3CR1/CXCR3/CXCR5/XCR1/CCL13/CCL8/CCL4/CCL16/CCL18/CCL26/CCL22/CCR3/CCL23/CCR1/CCRL2/MPL	35	biological process
GO:1990868	response to chemokine	36/247	97/18723	3.94e-43	7.5e-41	4.48e-41	CXCL10/CXCL9/CXCL11/CXCL13/XCL1/CCR10/CCL5/CCR6/CCL19/CCL17/CCR7/CCR8/CCL21/CCR5/CXCR4/CXCR6/CCR4/CX3CL1/CMKLR1/CX3CR1/CXCR3/CXCR5/XCR1/CCL13/CCL8/CCL4/CCL16/CCL18/CCL26/CCL22/CCR3/CCL23/CCR1/CCRL2/MPL/RHOA	36	biological process
GO:1990869	cellular response to chemokine	36/247	97/18723	3.94e-43	7.5e-41	4.48e-41	CXCL10/CXCL9/CXCL11/CXCL13/XCL1/CCR10/CCL5/CCR6/CCL19/CCL17/CCR7/CCR8/CCL21/CCR5/CXCR4/CXCR6/CCR4/CX3CL1/CMKLR1/CX3CR1/CXCR3/CXCR5/XCR1/CCL13/CCL8/CCL4/CCL16/CCL18/CCL26/CCL22/CCR3/CCL23/CCR1/CCRL2/MPL/RHOA	36	biological process
GO:0070663	regulation of leukocyte proliferation	48/247	245/18723	1.65e-42	2.98e-40	1.78e-40	CD1D/CD74/XCL1/IRF1/IL15/CD40/CCL5/IL12B/CD40LG/ARG2/VCAM1/CCL19/PTK2/SYK/BTK/RAC2/NFATC2/INPP5D/CD22/PTPN6/FCGR2B/CSF1/EBI3/TNFSF13B/TNFSF8/CSF1R/IL12RB1/IL27RA/IL5RA/TNFRSF13B/ZAP70/CD3E/PTPRC/CD28/CTLA4/PRKCQ/CCL8/TLR4/MAPK1/TNFSF4/IL10/CD86/IL2RA/MPL/TNFRSF1B/TNFRSF4/TYROBP/NCK1	48	biological process
GO:0002366	leukocyte activation involved in immune response	49/247	275/18723	2.75e-41	4.72e-39	2.82e-39	CD1C/CD74/IFNG/PTGDS/CD40/CCR6/IL12B/CD40LG/PIK3CG/CCL19/SYK/BTK/RAC2/CD19/PIK3CD/FCGR2B/PLCG2/SEMA4A/CX3CR1/IL12RB1/IL18R1/IL27RA/IL6R/PTGER4/ITGAL/LAT/CD244/SH2D1B/PTPRC/CD28/RASGRP1/FCER1G/ICAM1/RELB/TGFB1/TLR4/STAT3/GRN/HMOX1/TNFSF4/IL10/FGR/PTGDR/CD86/MALT1/PTAFR/ITGB2/TYROBP/CBL	49	biological process
GO:0002263	cell activation involved in immune response	49/247	279/18723	5.74e-41	9.38e-39	5.61e-39	CD1C/CD74/IFNG/PTGDS/CD40/CCR6/IL12B/CD40LG/PIK3CG/CCL19/SYK/BTK/RAC2/CD19/PIK3CD/FCGR2B/PLCG2/SEMA4A/CX3CR1/IL12RB1/IL18R1/IL27RA/IL6R/PTGER4/ITGAL/LAT/CD244/SH2D1B/PTPRC/CD28/RASGRP1/FCER1G/ICAM1/RELB/TGFB1/TLR4/STAT3/GRN/HMOX1/TNFSF4/IL10/FGR/PTGDR/CD86/MALT1/PTAFR/ITGB2/TYROBP/CBL	49	biological process
GO:0071621	granulocyte chemotaxis	37/247	125/18723	4.79e-40	7.46e-38	4.46e-38	CD74/CXCL10/CXCL9/CXCL11/CXCL13/XCL1/CCL5/PIK3CG/CCL19/CCL17/CCR7/CCL21/PTK2/SYK/VAV1/RAC2/PIK3CD/CX3CL1/CMKLR1/CSF1/CSF1R/FCER1G/CCL13/CCL8/NOD2/MAPK1/CCL4/CCL16/CCL18/CCL26/CCL22/CCL23/EDN3/C5AR1/C5AR2/C3AR1/ITGB2	37	biological process
GO:0007159	leukocyte cell-cell adhesion	53/247	371/18723	1.65e-39	2.46e-37	1.47e-37	B2M/CD1D/CD4/CD74/IFNG/XCL1/SOCS1/IRF1/IL15/CCL5/IL12B/IL7R/CD40LG/ARG2/VCAM1/CCL19/CCR7/CCL21/SYK/VAV1/RAC2/PTPN6/FCGR2B/SEMA4D/CX3CR1/EBI3/TNFSF13B/IL12RB1/IL27RA/ITGAL/LCK/ZAP70/CD3E/PTPRC/CD28/ICOS/CTLA4/RASGRP1/PRKCQ/ICAM1/NOD2/PRDX2/TNFSF4/IL10/CD86/OLR1/MALT1/PTAFR/TNFSF14/IL2RA/ITGB2/NCK1/RHOA	53	biological process
GO:0002699	positive regulation of immune effector process	45/247	235/18723	2.31e-39	3.29e-37	1.97e-37	B2M/CD1A/CD1B/CD1C/CD1D/CD1E/CD74/MR1/IFNG/KIR2DL4/LTA/XCL1/CD40/IL12B/CCL19/SYK/BTK/VAV1/RAC2/PLCG2/IL12RB1/IL18R1/NCR3/CD244/SH2D1B/SH2D1A/PTPRC/CD28/RASGRP1/KLRD1/RAET1E/TGFB1/TLR4/NOD2/HMOX1/TNFSF4/IL10/FGR/CD86/MALT1/PTAFR/IL18RAP/TNFRSF4/ITGB2/TYROBP	45	biological process
GO:0097530	granulocyte migration	38/247	148/18723	1.77e-38	2.43e-36	1.45e-36	CD74/CXCL10/CXCL9/CXCL11/CXCL13/XCL1/CCL5/PIK3CG/CCL19/CCL17/CCR7/CCL21/PTK2/SYK/VAV1/RAC2/PIK3CD/CX3CL1/CMKLR1/CSF1/CSF1R/PTGER4/FCER1G/CCL13/CCL8/NOD2/MAPK1/CCL4/CCL16/CCL18/CCL26/CCL22/CCL23/EDN3/C5AR1/C5AR2/C3AR1/ITGB2	38	biological process
GO:0022409	positive regulation of cell-cell adhesion	47/247	284/18723	4.99e-38	6.58e-36	3.93e-36	B2M/CD1D/CD4/CD74/IFNG/CXCL13/XCL1/SOCS1/IL15/CCL5/IL12B/IL7R/CD40LG/VCAM1/CCL19/CCR7/CCL21/JAK2/SYK/VAV1/PTPN6/CX3CL1/EBI3/TNFSF13B/IL12RB1/IL27RA/LCK/ZAP70/CD3E/PTPRC/CD28/ICOS/RASGRP1/PRKCQ/ICAM1/NOD2/JAK1/TNFSF4/IL10/CD86/MALT1/PTAFR/TNFSF14/IL2RA/ITGB2/NCK1/RHOA	47	biological process
GO:0050867	positive regulation of cell activation	54/247	420/18723	8.3e-38	1.05e-35	6.3e-36	B2M/CD1D/CD4/CD74/IFNG/XCL1/SOCS1/IL15/CD40/CCL5/IL12B/IL7R/CD40LG/VCAM1/CCL19/CCR7/CCL21/JAK2/SYK/BTK/VAV1/NFATC2/INPP5D/PTPN6/EBI3/TNFSF13B/IL12RB1/IL27RA/LCK/ZAP70/CD3E/PTPRC/CD28/ICOS/RASGRP1/PRKCQ/HAMP/TGFB1/TLR4/NOD2/TNFSF4/IL10/FGR/CD86/MALT1/PTAFR/TNFSF14/IL2RA/MPL/TNFRSF4/ITGB2/TYROBP/NCK1/RHOA	54	biological process
GO:0032944	regulation of mononuclear cell proliferation	43/247	227/18723	2.12e-37	2.6e-35	1.56e-35	CD1D/CD74/XCL1/IRF1/IL15/CD40/CCL5/IL12B/CD40LG/ARG2/VCAM1/CCL19/SYK/BTK/RAC2/NFATC2/INPP5D/CD22/PTPN6/FCGR2B/CSF1/EBI3/TNFSF13B/TNFSF8/IL12RB1/IL27RA/TNFRSF13B/ZAP70/CD3E/PTPRC/CD28/CTLA4/PRKCQ/TLR4/TNFSF4/IL10/CD86/IL2RA/MPL/TNFRSF1B/TNFRSF4/TYROBP/NCK1	43	biological process
GO:0050863	regulation of T cell activation	49/247	329/18723	2.24e-37	2.64e-35	1.58e-35	B2M/CD1D/CD4/CD74/IFNG/XCL1/SOCS1/IRF1/IL15/CCL5/IL12B/IL7R/CD40LG/ARG2/VCAM1/CCL19/CCR7/CCL21/SYK/VAV1/RAC2/PTPN6/FCGR2B/EBI3/TNFSF13B/TNFSF8/IL12RB1/IL27RA/LCK/ZAP70/LAT/CD3E/PTPRC/CD28/ICOS/CTLA4/RASGRP1/PRKCQ/NOD2/PRDX2/TNFSF4/IL10/CD86/MALT1/TNFSF14/IL2RA/TNFRSF1B/NCK1/RHOA	49	biological process
GO:0002696	positive regulation of leukocyte activation	53/247	409/18723	2.85e-37	3.26e-35	1.95e-35	B2M/CD1D/CD4/CD74/IFNG/XCL1/SOCS1/IL15/CD40/CCL5/IL12B/IL7R/CD40LG/VCAM1/CCL19/CCR7/CCL21/SYK/BTK/VAV1/NFATC2/INPP5D/PTPN6/EBI3/TNFSF13B/IL12RB1/IL27RA/LCK/ZAP70/CD3E/PTPRC/CD28/ICOS/RASGRP1/PRKCQ/HAMP/TGFB1/TLR4/NOD2/TNFSF4/IL10/FGR/CD86/MALT1/PTAFR/TNFSF14/IL2RA/MPL/TNFRSF4/ITGB2/TYROBP/NCK1/RHOA	53	biological process
GO:0097529	myeloid leukocyte migration	42/247	220/18723	1.11e-36	1.23e-34	7.36e-35	CD74/CXCL10/CXCL9/CXCL11/CXCL13/XCL1/CCL5/PIK3CG/CCL19/CCL17/CCR7/CCL21/PTK2/SYK/VAV1/RAC2/PIK3CD/CX3CL1/CMKLR1/CX3CR1/CSF1/CSF1R/IL6R/PTGER4/FCER1G/LGMN/CCL13/CCL8/NOD2/MAPK1/CCL4/CCL16/CCL18/CCL26/CCL22/CCL23/CCR1/EDN3/C5AR1/C5AR2/C3AR1/ITGB2	42	biological process
GO:0002764	immune response-regulating signaling pathway	55/247	468/18723	2.04e-36	2.19e-34	1.31e-34	MICB/TLR3/IRF1/CD40/TLR7/CYLD/CCR7/PTK2/TXK/CD79A/CD79B/SYK/BTK/VAV1/NFATC2/CD19/CR2/PIK3CD/INPP5D/CD22/PTPN6/FCGR2B/PLCG2/CMKLR1/ESR1/LCK/NCR3/CD247/ZAP70/SH2D1A/CD3E/PTPRC/ITK/CD28/CTLA4/PRKCQ/CTSS/FCER1G/KLRD1/TLR4/NOD2/TLR2/MAPK1/TLR8/TLR1/CD14/FGR/HCK/MALT1/C5AR1/C5AR2/CMTM3/C3AR1/TYROBP/LCP2	55	biological process
GO:0022407	regulation of cell-cell adhesion	54/247	448/18723	2.55e-36	2.65e-34	1.59e-34	B2M/CD1D/CD4/CD74/IFNG/CXCL13/XCL1/SOCS1/IRF1/IL15/CCL5/IL12B/IL7R/CD40LG/ARG2/VCAM1/CCL19/CCR7/CCL21/JAK2/PTK2/SYK/VAV1/PTPN6/FCGR2B/CX3CL1/EBI3/TNFSF13B/IL12RB1/IL27RA/LCK/ZAP70/CD3E/PTPRC/CD28/ICOS/CTLA4/RASGRP1/PRKCQ/ICAM1/TGFB1/NOD2/PRDX2/JAK1/TNFSF4/IL10/CD86/MALT1/PTAFR/TNFSF14/IL2RA/ITGB2/NCK1/RHOA	54	biological process
GO:0030217	T cell differentiation	44/247	257/18723	2.93e-36	2.93e-34	1.75e-34	B2M/CD1D/CD4/CD8A/CD74/MR1/IFNG/SOCS1/IRF1/IL15/CCR6/IL12B/IL7R/CCL19/CCR7/SYK/VAV1/PIK3CD/SEMA4A/TNFSF8/IL12RB1/IL18R1/IL6R/PTGER4/LCK/ZAP70/CD3D/CD3E/CD3G/PTPRC/ITK/CD28/CTLA4/RASGRP1/CTSL/FCER1G/RELB/STAT3/PRDX2/TNFSF4/CD86/MALT1/IL2RA/RHOA	44	biological process
GO:0050670	regulation of lymphocyte proliferation	42/247	225/18723	2.99e-36	2.93e-34	1.75e-34	CD1D/CD74/XCL1/IRF1/IL15/CD40/CCL5/IL12B/CD40LG/ARG2/VCAM1/CCL19/SYK/BTK/RAC2/NFATC2/INPP5D/CD22/PTPN6/FCGR2B/EBI3/TNFSF13B/TNFSF8/IL12RB1/IL27RA/TNFRSF13B/ZAP70/CD3E/PTPRC/CD28/CTLA4/PRKCQ/TLR4/TNFSF4/IL10/CD86/IL2RA/MPL/TNFRSF1B/TNFRSF4/TYROBP/NCK1	42	biological process
GO:0071674	mononuclear cell migration	40/247	196/18723	3.65e-36	3.47e-34	2.08e-34	CXCL10/CXCL11/CXCL13/XCL1/CCL5/CCR6/PIK3CG/CCL19/CCL17/CCR7/CCL21/CCR5/CXCR4/PTK2/PIK3CD/CX3CL1/CMKLR1/CX3CR1/CXCR3/CSF1/CSF1R/IL27RA/IL6R/ITGAL/ZAP70/ICAM1/LGMN/CCL13/CCL8/MAPK1/CCL4/CCL16/CCL18/CCL26/CCL22/CCL23/CCR1/C5AR1/C3AR1/RHOA	40	biological process
GO:1903037	regulation of leukocyte cell-cell adhesion	48/247	336/18723	9.86e-36	9.14e-34	5.46e-34	B2M/CD1D/CD4/CD74/IFNG/XCL1/SOCS1/IRF1/IL15/CCL5/IL12B/IL7R/CD40LG/ARG2/VCAM1/CCL19/CCR7/CCL21/SYK/VAV1/PTPN6/FCGR2B/EBI3/TNFSF13B/IL12RB1/IL27RA/LCK/ZAP70/CD3E/PTPRC/CD28/ICOS/CTLA4/RASGRP1/PRKCQ/ICAM1/NOD2/PRDX2/TNFSF4/IL10/CD86/MALT1/PTAFR/TNFSF14/IL2RA/ITGB2/NCK1/RHOA	48	biological process
GO:0002460	adaptive immune response based on somatic recombination of immune receptors built from immunoglobulin superfamily domains	49/247	356/18723	1.08e-35	9.76e-34	5.83e-34	B2M/CD1A/CD1B/CD1C/CD1D/CD1E/CD4/CD8A/CD74/MR1/LTA/CXCL13/XCL1/CD40/CCR6/IL12B/IL7R/CD40LG/CCL19/BTK/CD19/CR2/INPP5D/PTPN6/FCGR2B/SEMA4A/EBI3/TNFSF13B/IL12RB1/IL18R1/IL27RA/IL6R/PRF1/PTPRC/CD28/PRKCQ/FCER1G/ICAM1/KLRD1/RELB/TGFB1/TLR4/NOD2/STAT3/TLR8/TNFSF4/IL10/MALT1/TNFRSF1B	49	biological process
GO:0030593	neutrophil chemotaxis	32/247	103/18723	1.78e-35	1.56e-33	9.34e-34	CD74/CXCL10/CXCL9/CXCL11/CXCL13/XCL1/CCL5/PIK3CG/CCL19/CCL17/CCR7/CCL21/SYK/VAV1/RAC2/PIK3CD/CX3CL1/FCER1G/CCL13/CCL8/NOD2/CCL4/CCL16/CCL18/CCL26/CCL22/CCL23/EDN3/C5AR1/C5AR2/C3AR1/ITGB2	32	biological process
GO:0051251	positive regulation of lymphocyte activation	49/247	362/18723	2.45e-35	2.1e-33	1.25e-33	B2M/CD1D/CD4/CD74/IFNG/XCL1/SOCS1/IL15/CD40/CCL5/IL12B/IL7R/CD40LG/VCAM1/CCL19/CCR7/CCL21/SYK/BTK/VAV1/NFATC2/INPP5D/PTPN6/EBI3/TNFSF13B/IL12RB1/IL27RA/LCK/ZAP70/CD3E/PTPRC/CD28/ICOS/RASGRP1/PRKCQ/TGFB1/TLR4/NOD2/TNFSF4/IL10/CD86/MALT1/TNFSF14/IL2RA/MPL/TNFRSF4/TYROBP/NCK1/RHOA	49	biological process
GO:1903039	positive regulation of leukocyte cell-cell adhesion	42/247	239/18723	4.19e-35	3.5e-33	2.09e-33	B2M/CD1D/CD4/CD74/IFNG/XCL1/SOCS1/IL15/CCL5/IL12B/IL7R/CD40LG/VCAM1/CCL19/CCR7/CCL21/SYK/VAV1/PTPN6/EBI3/TNFSF13B/IL12RB1/IL27RA/LCK/ZAP70/CD3E/PTPRC/CD28/ICOS/RASGRP1/PRKCQ/ICAM1/NOD2/TNFSF4/CD86/MALT1/PTAFR/TNFSF14/IL2RA/ITGB2/NCK1/RHOA	42	biological process
GO:0002449	lymphocyte mediated immunity	48/247	350/18723	6.99e-35	5.71e-33	3.41e-33	B2M/CD1A/CD1B/CD1C/CD1D/CD1E/CD8A/CD74/MR1/KIR2DL4/LTA/XCL1/CD40/CCR6/IL12B/IL7R/CD40LG/BTK/VAV1/CD19/CR2/INPP5D/PTPN6/FCGR2B/IL12RB1/IL18R1/IL27RA/NCR1/NCR3/SH2D1B/SH2D1A/GZMB/PRF1/PTPRC/CD28/RASGRP1/FCER1G/ICAM1/KLRD1/RAET1E/TGFB1/NOD2/TLR8/TNFSF4/IL10/MALT1/IL18RAP/TNFRSF1B	48	biological process
GO:0002706	regulation of lymphocyte mediated immunity	37/247	168/18723	8.75e-35	6.97e-33	4.17e-33	B2M/CD1A/CD1B/CD1C/CD1D/CD1E/MR1/KIR2DL4/LTA/XCL1/CD40/IL12B/IL7R/BTK/VAV1/CR2/PTPN6/FCGR2B/IL12RB1/IL18R1/IL27RA/NCR1/NCR3/SH2D1B/SH2D1A/PTPRC/CD28/RASGRP1/KLRD1/RAET1E/TGFB1/NOD2/TNFSF4/IL10/MALT1/IL18RAP/TNFRSF1B	37	biological process
GO:0050870	positive regulation of T cell activation	39/247	216/18723	4.34e-33	3.38e-31	2.02e-31	B2M/CD1D/CD4/CD74/IFNG/XCL1/SOCS1/IL15/CCL5/IL12B/IL7R/CD40LG/VCAM1/CCL19/CCR7/CCL21/SYK/VAV1/PTPN6/EBI3/TNFSF13B/IL12RB1/IL27RA/LCK/ZAP70/CD3E/PTPRC/CD28/ICOS/RASGRP1/PRKCQ/NOD2/TNFSF4/CD86/MALT1/TNFSF14/IL2RA/NCK1/RHOA	39	biological process
GO:0002705	positive regulation of leukocyte mediated immunity	33/247	134/18723	8.06e-33	6.1e-31	3.65e-31	B2M/CD1A/CD1B/CD1C/CD1D/CD1E/MR1/KIR2DL4/LTA/XCL1/CD40/IL12B/BTK/VAV1/PLCG2/IL12RB1/IL18R1/NCR3/SH2D1B/SH2D1A/PTPRC/CD28/RASGRP1/KLRD1/RAET1E/TGFB1/NOD2/TNFSF4/MALT1/PTAFR/IL18RAP/ITGB2/TYROBP	33	biological process
GO:1990266	neutrophil migration	32/247	122/18723	8.19e-33	6.1e-31	3.65e-31	CD74/CXCL10/CXCL9/CXCL11/CXCL13/XCL1/CCL5/PIK3CG/CCL19/CCL17/CCR7/CCL21/SYK/VAV1/RAC2/PIK3CD/CX3CL1/FCER1G/CCL13/CCL8/NOD2/CCL4/CCL16/CCL18/CCL26/CCL22/CCL23/EDN3/C5AR1/C5AR2/C3AR1/ITGB2	32	biological process
GO:0034341	response to interferon-gamma	33/247	141/18723	5.05e-32	3.68e-30	2.2e-30	CD74/IFNG/CIITA/XCL1/TLR3/STAT1/SOCS1/IRF1/CD40/CCL5/IL12B/FASLG/GBP2/CCL19/CCL17/CCL21/JAK2/TXK/CX3CL1/IL12RB1/ICAM1/CCL13/CCL8/TLR4/TLR2/CCL4/JAK1/CCL16/CCL18/CCL26/CCL22/CCL23/HCK	33	biological process
GO:0002237	response to molecule of bacterial origin	46/247	363/18723	7.39e-32	5.28e-30	3.15e-30	B2M/LTA/CXCL10/CXCL9/CXCL11/CXCL13/CD40/CCL5/IRF5/IL12B/FASLG/VCAM1/CCR7/CCR5/JAK2/FCGR2B/PLCG2/CX3CL1/CX3CR1/CSF2RB/IL10RA/PTGER4/ICAM1/HAMP/CAMP/IFNAR1/TGFB1/TLR4/NFKB1/NOD2/TLR2/MAPK1/F2R/TLR1/PRDX2/CD14/TNFSF4/IL10/CD86/HCK/MALT1/C5AR1/PTAFR/IL12RB2/TNFRSF1B/RHOA	46	biological process
GO:0045785	positive regulation of cell adhesion	49/247	437/18723	2.06e-31	1.44e-29	8.6e-30	B2M/CD1D/CD4/CD74/IFNG/CXCL13/XCL1/SOCS1/IL15/CCL5/IL12B/IL7R/CD40LG/VCAM1/CCL19/CCR7/CCL21/JAK2/SYK/VAV1/PTPN6/CX3CL1/CSF1/EBI3/TNFSF13B/IL12RB1/IL27RA/TNFRSF18/LCK/ZAP70/CD3E/PTPRC/CD28/ICOS/RASGRP1/PRKCQ/ICAM1/NOD2/JAK1/TNFSF4/IL10/CD86/MALT1/PTAFR/TNFSF14/IL2RA/ITGB2/NCK1/RHOA	49	biological process
GO:0002274	myeloid leukocyte activation	38/247	223/18723	2.91e-31	2e-29	1.19e-29	CD74/IFNG/PTGDS/TLR3/IL15/CCL5/PIK3CG/JAK2/SYK/BTK/RAC2/PIK3CD/FCGR2B/PLCG2/CX3CL1/CX3CR1/CSF1/LAT/PTPRC/RASGRP1/FCER1G/RELB/HAMP/TLR4/TLR2/GRN/TLR1/HMOX1/IL10/FGR/PTGDR/C5AR1/PTAFR/IL18RAP/ITGB2/TYROBP/LCP2/CBL	38	biological process
GO:0002768	immune response-regulating cell surface receptor signaling pathway	43/247	315/18723	3.74e-31	2.51e-29	1.5e-29	MICB/CD40/CCR7/PTK2/TXK/CD79A/CD79B/SYK/BTK/VAV1/NFATC2/CD19/CR2/PIK3CD/INPP5D/CD22/PTPN6/FCGR2B/PLCG2/CMKLR1/LCK/NCR3/CD247/ZAP70/SH2D1A/CD3E/PTPRC/ITK/CD28/CTLA4/PRKCQ/FCER1G/KLRD1/MAPK1/FGR/HCK/MALT1/C5AR1/C5AR2/CMTM3/C3AR1/TYROBP/LCP2	43	biological process
GO:0070665	positive regulation of leukocyte proliferation	33/247	150/18723	4.58e-31	3.02e-29	1.81e-29	CD1D/CD74/XCL1/IL15/CD40/CCL5/IL12B/CD40LG/VCAM1/CCL19/PTK2/SYK/NFATC2/CSF1/EBI3/TNFSF13B/CSF1R/IL12RB1/IL27RA/IL5RA/ZAP70/CD3E/PTPRC/CD28/PRKCQ/TLR4/MAPK1/TNFSF4/CD86/IL2RA/MPL/TNFRSF4/NCK1	33	biological process
GO:0042098	T cell proliferation	36/247	199/18723	1.32e-30	8.52e-29	5.09e-29	CD1D/XCL1/IRF1/IL15/CCL5/IL12B/CD40LG/PIK3CG/ARG2/VCAM1/CCL19/SYK/RAC2/PTPN6/EBI3/TNFSF13B/TNFSF8/IL12RB1/IL27RA/ZAP70/CD3E/PTPRC/CD28/CTLA4/RASGRP1/PRKCQ/PRDX2/TNFSF4/IL10/CD86/MALT1/TNFSF14/IL2RA/TNFRSF1B/TNFRSF4/NCK1	36	biological process
GO:0071346	cellular response to interferon-gamma	30/247	118/18723	2.34e-30	1.48e-28	8.87e-29	IFNG/XCL1/TLR3/STAT1/SOCS1/IRF1/CCL5/IL12B/FASLG/GBP2/CCL19/CCL17/CCL21/JAK2/TXK/CX3CL1/IL12RB1/ICAM1/CCL13/CCL8/TLR4/TLR2/CCL4/JAK1/CCL16/CCL18/CCL26/CCL22/CCL23/HCK	30	biological process
GO:0002429	immune response-activating cell surface receptor signaling pathway	41/247	291/18723	2.84e-30	1.74e-28	1.04e-28	MICB/CCR7/PTK2/TXK/CD79A/CD79B/SYK/BTK/VAV1/NFATC2/CD19/CR2/PIK3CD/INPP5D/CD22/PTPN6/FCGR2B/PLCG2/CMKLR1/LCK/NCR3/CD247/ZAP70/SH2D1A/CD3E/PTPRC/ITK/CD28/CTLA4/FCER1G/KLRD1/MAPK1/FGR/HCK/MALT1/C5AR1/C5AR2/CMTM3/C3AR1/TYROBP/LCP2	41	biological process
GO:0002757	immune response-activating signal transduction	41/247	291/18723	2.84e-30	1.74e-28	1.04e-28	MICB/CCR7/PTK2/TXK/CD79A/CD79B/SYK/BTK/VAV1/NFATC2/CD19/CR2/PIK3CD/INPP5D/CD22/PTPN6/FCGR2B/PLCG2/CMKLR1/LCK/NCR3/CD247/ZAP70/SH2D1A/CD3E/PTPRC/ITK/CD28/CTLA4/FCER1G/KLRD1/MAPK1/FGR/HCK/MALT1/C5AR1/C5AR2/CMTM3/C3AR1/TYROBP/LCP2	41	biological process
GO:0031341	regulation of cell killing	28/247	99/18723	7.8e-30	4.69e-28	2.8e-28	B2M/CD1A/CD1B/CD1C/CD1D/CD1E/MR1/IFNG/KIR2DL4/XCL1/IL12B/IL7R/SYK/VAV1/FCGR2B/CX3CR1/IL12RB1/NCR1/NCR3/SH2D1A/PRF1/PTPRC/RASGRP1/ICAM1/KLRD1/RAET1E/IL18RAP/TYROBP	28	biological process
GO:0002708	positive regulation of lymphocyte mediated immunity	29/247	113/18723	1.67e-29	9.88e-28	5.91e-28	B2M/CD1A/CD1B/CD1C/CD1D/CD1E/MR1/KIR2DL4/LTA/XCL1/CD40/IL12B/BTK/VAV1/IL12RB1/IL18R1/NCR3/SH2D1B/SH2D1A/PTPRC/CD28/RASGRP1/KLRD1/RAET1E/TGFB1/NOD2/TNFSF4/MALT1/IL18RAP	29	biological process
GO:0002819	regulation of adaptive immune response	34/247	183/18723	2.39e-29	1.39e-27	8.32e-28	B2M/CD1A/CD1B/CD1C/CD1D/CD1E/CD4/MR1/LTA/XCL1/IRF1/CD40/IL12B/IL7R/CCL19/BTK/CR2/PTPN6/FCGR2B/TNFSF13B/IL12RB1/IL18R1/IL27RA/CD48/PTPRC/CD28/PRKCQ/KLRD1/TGFB1/NOD2/TNFSF4/IL10/MALT1/TNFRSF1B	34	biological process
GO:0002253	activation of immune response	44/247	375/18723	4.9e-29	2.8e-27	1.67e-27	MICB/CCR7/PTK2/TXK/CD79A/CD79B/SYK/BTK/VAV1/NFATC2/CD19/CR2/PIK3CD/INPP5D/CD22/PTPN6/FCGR2B/PLCG2/CMKLR1/LCK/NCR3/CD247/ZAP70/SH2D1A/CD3E/PTPRC/ITK/CD28/CTLA4/FCER1G/KLRD1/TLR4/NOD2/MAPK1/TBK1/FGR/HCK/MALT1/C5AR1/C5AR2/CMTM3/C3AR1/TYROBP/LCP2	44	biological process
GO:0001906	cell killing	34/247	188/18723	6.21e-29	3.49e-27	2.09e-27	B2M/CD1A/CD1B/CD1C/CD1D/CD1E/MR1/IFNG/KIR2DL4/XCL1/IL12B/GNLY/IL7R/SYK/VAV1/PTPN6/FCGR2B/CX3CR1/IL12RB1/NCR1/NCR3/SH2D1A/GZMB/PRF1/PTPRC/RASGRP1/ICAM1/KLRD1/RAET1E/HAMP/CAMP/CCL13/IL18RAP/TYROBP	34	biological process
GO:0031349	positive regulation of defense response	39/247	278/18723	9.72e-29	5.37e-27	3.21e-27	CD1D/IFNG/KIR2DL4/LTA/TLR3/IL15/TLR7/CCL5/IL12B/PIK3CG/CCR7/JAK2/TXK/SYK/BTK/VAV1/PLCG2/CX3CL1/IL16/PTGER4/NCR3/SH2D1B/SH2D1A/CD28/RASGRP1/KLRD1/RAET1E/TLR4/NOD2/TLR2/TLR8/GRN/TBK1/TNFSF4/HCK/IL17RA/IL18RAP/OSMR/TYROBP	39	biological process
GO:0002685	regulation of leukocyte migration	35/247	210/18723	1.74e-28	9.44e-27	5.64e-27	CD74/CXCL10/CXCL13/XCL1/CCL5/CCR6/CCL19/CCR7/CCL21/PTK2/RAC2/CX3CL1/CMKLR1/CX3CR1/CXCR3/CSF1/CSF1R/IL27RA/IL6R/PTGER4/TNFRSF18/ICAM1/LGMN/CCL8/NOD2/MAPK1/CCL4/HMOX1/CCR1/EDN3/C5AR1/C5AR2/PTAFR/C3AR1/RHOA	35	biological process
GO:0032496	response to lipopolysaccharide	42/247	343/18723	1.76e-28	9.44e-27	5.64e-27	LTA/CXCL10/CXCL9/CXCL11/CXCL13/CD40/CCL5/IL12B/FASLG/VCAM1/CCR7/CCR5/JAK2/PLCG2/CX3CL1/CX3CR1/CSF2RB/IL10RA/PTGER4/ICAM1/HAMP/CAMP/IFNAR1/TGFB1/TLR4/NFKB1/NOD2/TLR2/MAPK1/F2R/PRDX2/CD14/TNFSF4/IL10/CD86/HCK/MALT1/C5AR1/PTAFR/IL12RB2/TNFRSF1B/RHOA	42	biological process
GO:0002822	regulation of adaptive immune response based on somatic recombination of immune receptors built from immunoglobulin superfamily domains	32/247	168/18723	5.07e-28	2.67e-26	1.6e-26	B2M/CD1A/CD1B/CD1C/CD1D/CD1E/CD4/MR1/LTA/XCL1/CD40/IL12B/IL7R/CCL19/BTK/CR2/PTPN6/FCGR2B/TNFSF13B/IL12RB1/IL18R1/IL27RA/PTPRC/CD28/PRKCQ/KLRD1/TGFB1/NOD2/TNFSF4/IL10/MALT1/TNFRSF1B	32	biological process
GO:0006874	cellular calcium ion homeostasis	46/247	448/18723	8.48e-28	4.4e-26	2.63e-26	CXCL10/CXCL9/CXCL11/CXCL13/XCL1/CCR10/CD40/CCL5/CCR6/PIK3CG/FASLG/CCL19/CCR7/CCR8/CCL21/CCR5/CXCR4/CXCR6/CCR4/JAK2/CD19/PTPN6/PLCG2/CX3CL1/CMKLR1/CX3CR1/CXCR3/CXCR5/CYSLTR1/XCR1/ESR1/PTGER4/LCK/PTPRC/CCL13/CCL8/F2R/CCR3/CCL23/CCR1/PTGDR/EDN3/C5AR1/CCRL2/C5AR2/C3AR1	46	biological process
GO:0001910	regulation of leukocyte mediated cytotoxicity	25/247	82/18723	1.16e-27	5.92e-26	3.54e-26	B2M/CD1A/CD1B/CD1C/CD1D/CD1E/MR1/KIR2DL4/XCL1/IL12B/IL7R/VAV1/FCGR2B/CX3CR1/IL12RB1/NCR1/NCR3/SH2D1A/PTPRC/RASGRP1/ICAM1/KLRD1/RAET1E/IL18RAP/TYROBP	25	biological process
GO:0007204	positive regulation of cytosolic calcium ion concentration	40/247	319/18723	1.53e-27	7.74e-26	4.62e-26	CXCL10/CXCL9/CXCL11/CXCL13/XCL1/CCR10/CCR6/PIK3CG/FASLG/CCL19/CCR7/CCR8/CCL21/CCR5/CXCR4/CXCR6/CCR4/JAK2/CD19/PTPN6/PLCG2/CX3CL1/CMKLR1/CX3CR1/CXCR3/CXCR5/CYSLTR1/XCR1/ESR1/PTGER4/LCK/PTPRC/F2R/CCR3/CCR1/PTGDR/C5AR1/CCRL2/C5AR2/C3AR1	40	biological process
GO:0002683	negative regulation of immune system process	45/247	434/18723	2.24e-27	1.11e-25	6.66e-26	CD74/KIR2DL4/MICB/TAPBPL/XCL1/TLR3/SOCS1/IRF1/IL12B/IL7R/PDCD1/ARG2/CCL21/SYK/BTK/CR2/INPP5D/CD22/PTPN6/FCGR2B/CX3CL1/CX3CR1/IL27RA/PTGER4/TNFRSF13B/SH2D1A/PTPRC/CTLA4/KLRD1/TGFB1/TLR4/NOD2/GRN/PRDX2/HMOX1/TNFSF4/IL10/FGR/CD86/HCK/LILRB3/C5AR2/INHBA/IL2RA/TYROBP	45	biological process
GO:0055074	calcium ion homeostasis	46/247	460/18723	2.68e-27	1.31e-25	7.85e-26	CXCL10/CXCL9/CXCL11/CXCL13/XCL1/CCR10/CD40/CCL5/CCR6/PIK3CG/FASLG/CCL19/CCR7/CCR8/CCL21/CCR5/CXCR4/CXCR6/CCR4/JAK2/CD19/PTPN6/PLCG2/CX3CL1/CMKLR1/CX3CR1/CXCR3/CXCR5/CYSLTR1/XCR1/ESR1/PTGER4/LCK/PTPRC/CCL13/CCL8/F2R/CCR3/CCL23/CCR1/PTGDR/EDN3/C5AR1/CCRL2/C5AR2/C3AR1	46	biological process
GO:0002687	positive regulation of leukocyte migration	29/247	135/18723	4.54e-27	2.19e-25	1.31e-25	CD74/CXCL10/CXCL13/XCL1/CCL5/CCR6/CCL19/CCR7/CCL21/PTK2/RAC2/CX3CL1/CMKLR1/CX3CR1/CSF1/CSF1R/IL6R/TNFRSF18/ICAM1/LGMN/CCL8/MAPK1/CCL4/CCR1/EDN3/C5AR1/PTAFR/C3AR1/RHOA	29	biological process
GO:0001909	leukocyte mediated cytotoxicity	28/247	124/18723	8.11e-27	3.86e-25	2.31e-25	B2M/CD1A/CD1B/CD1C/CD1D/CD1E/MR1/KIR2DL4/XCL1/IL12B/IL7R/VAV1/PTPN6/FCGR2B/CX3CR1/IL12RB1/NCR1/NCR3/SH2D1A/GZMB/PRF1/PTPRC/RASGRP1/ICAM1/KLRD1/RAET1E/IL18RAP/TYROBP	28	biological process
GO:0032946	positive regulation of mononuclear cell proliferation	29/247	138/18723	8.95e-27	4.2e-25	2.51e-25	CD1D/CD74/XCL1/IL15/CD40/CCL5/IL12B/CD40LG/VCAM1/CCL19/SYK/NFATC2/CSF1/EBI3/TNFSF13B/IL12RB1/IL27RA/ZAP70/CD3E/PTPRC/CD28/PRKCQ/TLR4/TNFSF4/CD86/IL2RA/MPL/TNFRSF4/NCK1	29	biological process
GO:0042113	B cell activation	40/247	334/18723	9.21e-27	4.27e-25	2.55e-25	CD74/CD40/CCR6/IL7R/CD40LG/VCAM1/CD79A/CD79B/SYK/BTK/NFATC2/CD19/CR2/PIK3CD/INPP5D/CD22/PTPN6/FCGR2B/PLCG2/CXCR5/CMTM7/TNFSF13B/FLT3/IL27RA/TNFRSF13B/ZAP70/PTPRC/CD28/CTLA4/RASGRP1/TGFB1/TLR4/NOD2/TNFSF4/IL10/CD86/MALT1/INHBA/TNFRSF4/TYROBP	40	biological process
GO:0050921	positive regulation of chemotaxis	29/247	141/18723	1.74e-26	7.93e-25	4.74e-25	CD74/CXCL10/CXCL13/XCL1/TMSB4X/CCL5/CCR6/CCL19/CCR7/CCL21/CXCR4/CCR4/PTK2/RAC2/CMKLR1/CX3CR1/CSF1/IL16/CSF1R/IL6R/LGMN/TGFB1/MAPK1/CCL4/CCL26/CCR1/EDN3/C5AR1/C3AR1	29	biological process
GO:0072503	cellular divalent inorganic cation homeostasis	46/247	486/18723	2.89e-26	1.3e-24	7.78e-25	CXCL10/CXCL9/CXCL11/CXCL13/XCL1/CCR10/CD40/CCL5/CCR6/PIK3CG/FASLG/CCL19/CCR7/CCR8/CCL21/CCR5/CXCR4/CXCR6/CCR4/JAK2/CD19/PTPN6/PLCG2/CX3CL1/CMKLR1/CX3CR1/CXCR3/CXCR5/CYSLTR1/XCR1/ESR1/PTGER4/LCK/PTPRC/CCL13/CCL8/F2R/CCR3/CCL23/CCR1/PTGDR/EDN3/C5AR1/CCRL2/C5AR2/C3AR1	46	biological process
GO:0072676	lymphocyte migration	27/247	117/18723	3.63e-26	1.61e-24	9.65e-25	CXCL10/CXCL11/CXCL13/XCL1/CCL5/CCR6/PIK3CG/CCL19/CCL17/CCR7/CCL21/PIK3CD/CX3CL1/CXCR3/IL27RA/ITGAL/ZAP70/ICAM1/CCL13/CCL8/CCL4/CCL16/CCL18/CCL26/CCL22/CCL23/RHOA	27	biological process
GO:0031343	positive regulation of cell killing	22/247	63/18723	5.62e-26	2.47e-24	1.48e-24	B2M/CD1A/CD1B/CD1C/CD1D/CD1E/MR1/IFNG/XCL1/IL12B/SYK/VAV1/IL12RB1/NCR3/SH2D1A/PRF1/PTPRC/RASGRP1/KLRD1/RAET1E/IL18RAP/TYROBP	22	biological process
GO:0071356	cellular response to tumor necrosis factor	34/247	229/18723	5.85e-26	2.54e-24	1.52e-24	XCL1/TMSB4X/STAT1/CD40/CCL5/CYLD/VCAM1/GBP2/CCL19/CCL17/CCL21/JAK2/SYK/CX3CL1/TNFSF13B/TNFRSF17/TNFRSF18/FAS/ICAM1/HAMP/CAMP/CCL13/CCL8/NFKB1/MAPK1/CCL4/TANK/CCL16/CCL18/CCL26/CCL22/CCL23/TNFRSF1B/TNFRSF4	34	biological process
GO:0051480	regulation of cytosolic calcium ion concentration	40/247	353/18723	7.83e-26	3.36e-24	2.01e-24	CXCL10/CXCL9/CXCL11/CXCL13/XCL1/CCR10/CCR6/PIK3CG/FASLG/CCL19/CCR7/CCR8/CCL21/CCR5/CXCR4/CXCR6/CCR4/JAK2/CD19/PTPN6/PLCG2/CX3CL1/CMKLR1/CX3CR1/CXCR3/CXCR5/CYSLTR1/XCR1/ESR1/PTGER4/LCK/PTPRC/F2R/CCR3/CCR1/PTGDR/C5AR1/CCRL2/C5AR2/C3AR1	40	biological process
GO:0034612	response to tumor necrosis factor	35/247	253/18723	1.25e-25	5.27e-24	3.15e-24	XCL1/TMSB4X/STAT1/CD40/CCL5/CYLD/VCAM1/GBP2/CCL19/CCL17/CCL21/JAK2/SYK/CX3CL1/TNFSF13B/TNFRSF17/TNFRSF18/FAS/ICAM1/HAMP/CAMP/CCL13/CCL8/NFKB1/MAPK1/CCL4/CD14/TANK/CCL16/CCL18/CCL26/CCL22/CCL23/TNFRSF1B/TNFRSF4	35	biological process
GO:0050671	positive regulation of lymphocyte proliferation	28/247	137/18723	1.6e-25	6.68e-24	4e-24	CD1D/CD74/XCL1/IL15/CD40/CCL5/IL12B/CD40LG/VCAM1/CCL19/SYK/NFATC2/EBI3/TNFSF13B/IL12RB1/IL27RA/ZAP70/CD3E/PTPRC/CD28/PRKCQ/TLR4/TNFSF4/CD86/IL2RA/MPL/TNFRSF4/NCK1	28	biological process
GO:0042129	regulation of T cell proliferation	30/247	171/18723	3.32e-25	1.37e-23	8.19e-24	CD1D/XCL1/IRF1/IL15/CCL5/IL12B/CD40LG/ARG2/VCAM1/CCL19/SYK/RAC2/PTPN6/EBI3/TNFSF13B/TNFSF8/IL12RB1/IL27RA/ZAP70/CD3E/PTPRC/CD28/CTLA4/PRKCQ/TNFSF4/IL10/CD86/IL2RA/TNFRSF1B/NCK1	30	biological process
GO:0050920	regulation of chemotaxis	33/247	223/18723	3.62e-25	1.48e-23	8.82e-24	CD74/CXCL10/CXCL13/XCL1/TMSB4X/CCL5/CCR6/CCL19/CCR7/CCL21/CXCR4/CCR4/PTK2/RAC2/SEMA4A/SEMA4D/CMKLR1/CX3CR1/CSF1/IL16/CSF1R/IL6R/LGMN/TGFB1/NOD2/MAPK1/CCL4/CCL26/CCR1/EDN3/C5AR1/C5AR2/C3AR1	33	biological process
GO:0046631	alpha-beta T cell activation	29/247	156/18723	3.77e-25	1.52e-23	9.1e-24	IFNG/XCL1/SOCS1/IRF1/IL15/IL12B/ARG2/CCL19/SYK/SEMA4A/EBI3/TNFSF8/IL12RB1/IL18R1/IL6R/PTGER4/ZAP70/CD3E/PTPRC/ITK/CD28/PRKCQ/CTSL/RELB/STAT3/TNFSF4/CD86/MALT1/RHOA	29	biological process
GO:0002831	regulation of response to biotic stimulus	38/247	327/18723	5.8e-25	2.31e-23	1.38e-23	CD1D/MR1/KIR2DL4/MICB/APOBEC3G/STAT1/SOCS1/IRF1/IL15/APOBEC3F/CCL5/IL12B/ARG2/TXK/SYK/VAV1/PTPN6/FCGR2B/PLCG2/CX3CL1/IL12RB1/NCR1/NCR3/SH2D1B/SH2D1A/RASGRP1/KLRD1/RAET1E/TLR4/NOD2/TLR8/GRN/PRDX2/TBK1/FGR/HCK/IL18RAP/TYROBP	38	biological process
GO:0071216	cellular response to biotic stimulus	34/247	246/18723	6.65e-25	2.62e-23	1.57e-23	CXCL10/CXCL9/CXCL11/CXCL13/CD40/CCL5/IL12B/CCR5/SYK/BTK/FCGR2B/PLCG2/CX3CL1/CX3CR1/ICAM1/HAMP/CAMP/TGFB1/TLR4/NFKB1/NOD2/TLR2/MAPK1/TLR1/PRDX2/CD14/TNFSF4/IL10/CD86/HCK/MALT1/PTAFR/TNFRSF1B/RHOA	34	biological process
GO:0002285	lymphocyte activation involved in immune response	31/247	194/18723	9.87e-25	3.84e-23	2.3e-23	CD1C/CD74/IFNG/CD40/CCR6/IL12B/CD40LG/CCL19/CD19/FCGR2B/PLCG2/SEMA4A/IL12RB1/IL18R1/IL27RA/IL6R/PTGER4/ITGAL/CD244/PTPRC/CD28/FCER1G/ICAM1/RELB/TGFB1/TLR4/STAT3/TNFSF4/IL10/CD86/MALT1	31	biological process
GO:0032615	interleukin-12 production	21/247	62/18723	1.62e-24	6.18e-23	3.69e-23	IFNG/TLR3/IRF1/CD40/IRF5/IL12B/CD40LG/CCL19/CCR7/SYK/PLCG2/CMKLR1/IL16/LTB/TLR4/NFKB1/NOD2/TLR2/TLR8/TNFSF4/IL10	21	biological process
GO:0032655	regulation of interleukin-12 production	21/247	62/18723	1.62e-24	6.18e-23	3.69e-23	IFNG/TLR3/IRF1/CD40/IRF5/IL12B/CD40LG/CCL19/CCR7/SYK/PLCG2/CMKLR1/IL16/LTB/TLR4/NFKB1/NOD2/TLR2/TLR8/TNFSF4/IL10	21	biological process
GO:1902105	regulation of leukocyte differentiation	35/247	279/18723	3.63e-24	1.37e-22	8.18e-23	CD4/CD74/IFNG/TLR3/SOCS1/IRF1/IL15/IL12B/IL7R/CCL19/SYK/BTK/INPP5D/PTPN6/FCGR2B/CSF1/IL12RB1/ZAP70/PTPRC/CD28/CTLA4/RASGRP1/TGFB1/TLR4/PRDX2/TNFSF4/CCR1/IL10/CD86/MALT1/LILRB3/INHBA/IL2RA/TYROBP/RHOA	35	biological process
GO:1903706	regulation of hemopoiesis	39/247	367/18723	3.72e-24	1.39e-22	8.28e-23	B2M/CD4/CD74/IFNG/TLR3/STAT1/SOCS1/IRF1/IL15/IL12B/IL7R/CCL19/SYK/BTK/INPP5D/PTPN6/FCGR2B/CSF1/IL12RB1/ZAP70/PTPRC/CD28/CTLA4/RASGRP1/TGFB1/TLR4/STAT3/PRDX2/TNFSF4/CCR1/IL10/CD86/MALT1/LILRB3/INHBA/IL2RA/MPL/TYROBP/RHOA	39	biological process
GO:0071219	cellular response to molecule of bacterial origin	32/247	221/18723	3.99e-24	1.47e-22	8.8e-23	CXCL10/CXCL9/CXCL11/CXCL13/CD40/CCL5/IL12B/CCR5/FCGR2B/PLCG2/CX3CL1/CX3CR1/ICAM1/HAMP/CAMP/TGFB1/TLR4/NFKB1/NOD2/TLR2/MAPK1/TLR1/PRDX2/CD14/TNFSF4/IL10/CD86/HCK/MALT1/PTAFR/TNFRSF1B/RHOA	32	biological process
GO:0050727	regulation of inflammatory response	39/247	386/18723	2.4e-23	8.75e-22	5.23e-22	IFNG/LTA/XCL1/TMSB4X/TLR3/IL15/TLR7/CCL5/CYLD/IL12B/PIK3CG/CCR7/JAK2/SYK/BTK/FCGR2B/PLCG2/CX3CL1/IL16/ESR1/IL22RA2/PTGER4/PTPRC/CD28/HAMP/MMP9/TLR4/NFKB1/NOD2/TLR2/GRN/TNFSF4/IL10/FGR/HCK/IL17RA/IL2RA/OSMR/TNFRSF1B	39	biological process
GO:0002690	positive regulation of leukocyte chemotaxis	23/247	94/18723	4.49e-23	1.62e-21	9.68e-22	CD74/CXCL10/CXCL13/XCL1/CCL5/CCR6/CCL19/CCR7/CCL21/PTK2/RAC2/CMKLR1/CX3CR1/CSF1/CSF1R/IL6R/LGMN/MAPK1/CCL4/CCR1/EDN3/C5AR1/C3AR1	23	biological process
GO:0002824	positive regulation of adaptive immune response based on somatic recombination of immune receptors built from immunoglobulin superfamily domains	24/247	107/18723	4.75e-23	1.7e-21	1.01e-21	B2M/CD1A/CD1B/CD1C/CD1D/CD1E/CD4/MR1/LTA/XCL1/CD40/IL12B/BTK/TNFSF13B/IL12RB1/IL18R1/IL27RA/PTPRC/CD28/PRKCQ/TGFB1/NOD2/TNFSF4/MALT1	24	biological process
GO:0002688	regulation of leukocyte chemotaxis	25/247	122/18723	6.39e-23	2.26e-21	1.35e-21	CD74/CXCL10/CXCL13/XCL1/CCL5/CCR6/CCL19/CCR7/CCL21/PTK2/RAC2/CMKLR1/CX3CR1/CSF1/CSF1R/IL6R/LGMN/NOD2/MAPK1/CCL4/CCR1/EDN3/C5AR1/C5AR2/C3AR1	25	biological process
GO:0043410	positive regulation of MAPK cascade	42/247	480/18723	1.14e-22	4e-21	2.39e-21	CD4/CD74/XCL1/TLR3/CD40/CCL5/PIK3CG/CCL19/CCL17/CCR7/CCL21/SYK/FCGR2B/PLCG2/CX3CL1/ADRB2/CSF1R/FLT3/PTPRC/RASGRP1/ICAM1/CCL13/CCL8/TGFB1/TLR4/NOD2/F2R/PRDX2/CCL4/MARCO/CCL16/CCL18/CCL26/CCL22/CCL23/CCR1/PIK3R5/EDN3/C5AR1/C5AR2/FGF19/NENF	42	biological process
GO:0048247	lymphocyte chemotaxis	20/247	64/18723	1.37e-22	4.76e-21	2.84e-21	CXCL10/CXCL11/CXCL13/XCL1/CCL5/PIK3CG/CCL19/CCL17/CCL21/PIK3CD/CX3CL1/CXCR3/CCL13/CCL8/CCL4/CCL16/CCL18/CCL26/CCL22/CCL23	20	biological process
GO:0071222	cellular response to lipopolysaccharide	30/247	209/18723	1.49e-22	5.09e-21	3.05e-21	CXCL10/CXCL9/CXCL11/CXCL13/CD40/CCL5/IL12B/CCR5/PLCG2/CX3CL1/CX3CR1/ICAM1/HAMP/CAMP/TGFB1/TLR4/NFKB1/NOD2/TLR2/MAPK1/PRDX2/CD14/TNFSF4/IL10/CD86/HCK/MALT1/PTAFR/TNFRSF1B/RHOA	30	biological process
GO:0002821	positive regulation of adaptive immune response	24/247	112/18723	1.54e-22	5.21e-21	3.12e-21	B2M/CD1A/CD1B/CD1C/CD1D/CD1E/CD4/MR1/LTA/XCL1/CD40/IL12B/BTK/TNFSF13B/IL12RB1/IL18R1/IL27RA/PTPRC/CD28/PRKCQ/TGFB1/NOD2/TNFSF4/MALT1	24	biological process
GO:0001912	positive regulation of leukocyte mediated cytotoxicity	19/247	56/18723	2.64e-22	8.89e-21	5.31e-21	B2M/CD1A/CD1B/CD1C/CD1D/CD1E/MR1/XCL1/IL12B/VAV1/IL12RB1/NCR3/SH2D1A/PTPRC/RASGRP1/KLRD1/RAET1E/IL18RAP/TYROBP	19	biological process
GO:0070374	positive regulation of ERK1 and ERK2 cascade	30/247	217/18723	4.56e-22	1.52e-20	9.07e-21	CD4/CD74/XCL1/CCL5/CCL19/CCL17/CCR7/CCL21/CX3CL1/CSF1R/PTPRC/RASGRP1/ICAM1/CCL13/CCL8/TGFB1/TLR4/NOD2/F2R/CCL4/MARCO/CCL16/CCL18/CCL26/CCL22/CCL23/CCR1/C5AR1/C5AR2/FGF19	30	biological process
GO:0032735	positive regulation of interleukin-12 production	17/247	41/18723	7.29e-22	2.4e-20	1.44e-20	IFNG/TLR3/IRF1/CD40/IRF5/IL12B/CD40LG/CCL19/CCR7/SYK/PLCG2/IL16/LTB/TLR4/NOD2/TLR2/TNFSF4	17	biological process
GO:0019722	calcium-mediated signaling	29/247	202/18723	7.81e-22	2.55e-20	1.52e-20	CD4/CCR10/CCR6/VCAM1/CCR7/CCR8/CCR5/CXCR4/CXCR6/CCR4/SYK/BTK/NFATC2/CD22/PLCG2/CMKLR1/CX3CR1/CXCR3/CXCR5/XCR1/ZAP70/LAT/CD3E/PTPRC/CCL4/CCR3/CCR1/PPP3CC/CCRL2	29	biological process
GO:0045058	T cell selection	18/247	50/18723	9.73e-22	3.15e-20	1.88e-20	CD1D/CD4/CD74/IL15/IL12B/CCR7/SYK/IL12RB1/IL6R/ZAP70/CD3D/CD3E/CD3G/PTPRC/CD28/CTSL/STAT3/RHOA	18	biological process
GO:0009615	response to virus	36/247	367/18723	3.7e-21	1.19e-19	7.09e-20	IFNG/MICB/CXCL10/CXCL9/XCL1/APOBEC3G/TLR3/STAT1/IRF1/IL15/APOBEC3F/CD40/TLR7/CCL5/IRF5/IL12B/APOBEC3C/TRIM22/CCL19/CXCR4/IL12RB1/PRF1/PTPRC/CCL8/IFNAR1/NFKB1/TLR2/TLR8/CCL4/IFNAR2/TBK1/TNFSF4/CCL22/FGR/RNASE2/IL17RA	36	biological process
GO:0042102	positive regulation of T cell proliferation	22/247	101/18723	6.43e-21	2.04e-19	1.22e-19	CD1D/XCL1/IL15/CCL5/IL12B/CD40LG/VCAM1/CCL19/SYK/EBI3/TNFSF13B/IL12RB1/IL27RA/ZAP70/CD3E/PTPRC/CD28/PRKCQ/TNFSF4/CD86/IL2RA/NCK1	22	biological process
GO:0018108	peptidyl-tyrosine phosphorylation	36/247	375/18723	7.65e-21	2.41e-19	1.44e-19	CD4/CD74/IFNG/SOCS1/IL15/CD40/CCL5/IL12B/JAK2/PTK2/TXK/SYK/BTK/PTPN6/PLCG2/SEMA4D/CSF1R/FLT3/IL22RA2/IL6R/TNFRSF18/LCK/ZAP70/CD3E/PTPRC/ITK/ICAM1/TGFB1/NOD2/NOX4/JAK1/FGR/HCK/IL12RB2/ITGB2/CBL	36	biological process
GO:0002700	regulation of production of molecular mediator of immune response	26/247	164/18723	8.46e-21	2.64e-19	1.58e-19	B2M/CD74/KIR2DL4/XCL1/TLR3/CD40/CD40LG/BTK/CD22/FCGR2B/PLCG2/IL18R1/IL27RA/CD244/PTPRC/CD28/TGFB1/TLR4/NOD2/HMOX1/TNFSF4/IL10/CD86/MALT1/TNFRSF1B/TNFRSF4	26	biological process
GO:0018212	peptidyl-tyrosine modification	36/247	378/18723	9.99e-21	3.09e-19	1.85e-19	CD4/CD74/IFNG/SOCS1/IL15/CD40/CCL5/IL12B/JAK2/PTK2/TXK/SYK/BTK/PTPN6/PLCG2/SEMA4D/CSF1R/FLT3/IL22RA2/IL6R/TNFRSF18/LCK/ZAP70/CD3E/PTPRC/ITK/ICAM1/TGFB1/NOD2/NOX4/JAK1/FGR/HCK/IL12RB2/ITGB2/CBL	36	biological process
GO:0070371	ERK1 and ERK2 cascade	34/247	330/18723	1.06e-20	3.24e-19	1.93e-19	CD4/CD74/XCL1/CCL5/CCL19/CCL17/CCR7/CCL21/SYK/PTPN6/CX3CL1/CSF1R/PTGER4/PTPRC/RASGRP1/ICAM1/CCL13/CCL8/TGFB1/TLR4/NOD2/MAPK1/F2R/CCL4/MARCO/CCL16/CCL18/CCL26/CCL22/CCL23/CCR1/C5AR1/C5AR2/FGF19	34	biological process
GO:0002548	monocyte chemotaxis	19/247	70/18723	3.36e-20	1.02e-18	6.09e-19	CXCL10/XCL1/CCL5/CCL19/CCL17/CCL21/CX3CL1/CX3CR1/IL6R/LGMN/CCL13/CCL8/CCL4/CCL16/CCL18/CCL26/CCL22/CCL23/CCR1	19	biological process
GO:0002456	T cell mediated immunity	22/247	109/18723	3.81e-20	1.15e-18	6.85e-19	B2M/CD1A/CD1B/CD1C/CD1D/CD1E/CD8A/MR1/XCL1/IL12B/IL7R/FCGR2B/IL12RB1/IL18R1/PRF1/PTPRC/ICAM1/KLRD1/NOD2/TNFSF4/MALT1/TNFRSF1B	22	biological process
GO:0045619	regulation of lymphocyte differentiation	26/247	174/18723	3.99e-20	1.19e-18	7.11e-19	CD74/IFNG/SOCS1/IRF1/IL15/IL12B/IL7R/CCL19/SYK/BTK/INPP5D/PTPN6/IL12RB1/ZAP70/PTPRC/CD28/CTLA4/RASGRP1/PRDX2/TNFSF4/IL10/CD86/MALT1/INHBA/IL2RA/RHOA	26	biological process
GO:1902107	positive regulation of leukocyte differentiation	25/247	157/18723	4.36e-20	1.28e-18	7.64e-19	CD4/CD74/IFNG/SOCS1/IL15/IL12B/IL7R/CCL19/SYK/BTK/INPP5D/CSF1/IL12RB1/ZAP70/PTPRC/RASGRP1/TGFB1/TNFSF4/CCR1/IL10/CD86/MALT1/IL2RA/TYROBP/RHOA	25	biological process
GO:1903708	positive regulation of hemopoiesis	25/247	157/18723	4.36e-20	1.28e-18	7.64e-19	CD4/CD74/IFNG/SOCS1/IL15/IL12B/IL7R/CCL19/SYK/BTK/INPP5D/CSF1/IL12RB1/ZAP70/PTPRC/RASGRP1/TGFB1/TNFSF4/CCR1/IL10/CD86/MALT1/IL2RA/TYROBP/RHOA	25	biological process
GO:0032609	interferon-gamma production	22/247	112/18723	7.14e-20	2.06e-18	1.23e-18	LTA/XCL1/TLR3/TLR7/IL12B/CCR7/TXK/EBI3/IL12RB1/IL18R1/IL27RA/CD244/CD3E/RASGRP1/TLR4/NOD2/TLR8/CD14/TNFSF4/IL10/INHBA/IL12RB2	22	biological process
GO:0032649	regulation of interferon-gamma production	22/247	112/18723	7.14e-20	2.06e-18	1.23e-18	LTA/XCL1/TLR3/TLR7/IL12B/CCR7/TXK/EBI3/IL12RB1/IL18R1/IL27RA/CD244/CD3E/RASGRP1/TLR4/NOD2/TLR8/CD14/TNFSF4/IL10/INHBA/IL12RB2	22	biological process
GO:0045088	regulation of innate immune response	28/247	218/18723	8.93e-20	2.55e-18	1.53e-18	CD1D/KIR2DL4/SOCS1/IRF1/CCL5/IL12B/TXK/SYK/VAV1/PTPN6/FCGR2B/PLCG2/NCR1/NCR3/SH2D1B/SH2D1A/RASGRP1/KLRD1/RAET1E/TLR4/NOD2/TLR8/GRN/TBK1/FGR/HCK/IL18RAP/TYROBP	28	biological process
GO:0042100	B cell proliferation	21/247	99/18723	9.25e-20	2.62e-18	1.57e-18	CD74/CD40/IL7R/CD40LG/CD79A/BTK/NFATC2/CD19/CR2/INPP5D/CD22/FCGR2B/TNFSF13B/TNFRSF13B/PTPRC/CTLA4/RASGRP1/TLR4/IL10/TNFRSF4/TYROBP	21	biological process
GO:0070372	regulation of ERK1 and ERK2 cascade	32/247	309/18723	1.35e-19	3.78e-18	2.26e-18	CD4/CD74/XCL1/CCL5/CCL19/CCL17/CCR7/CCL21/SYK/PTPN6/CX3CL1/CSF1R/PTPRC/RASGRP1/ICAM1/CCL13/CCL8/TGFB1/TLR4/NOD2/F2R/CCL4/MARCO/CCL16/CCL18/CCL26/CCL22/CCL23/CCR1/C5AR1/C5AR2/FGF19	32	biological process
GO:0032635	interleukin-6 production	25/247	165/18723	1.53e-19	4.22e-18	2.52e-18	CD74/IFNG/TLR3/TLR7/SYK/INPP5D/PTPN6/PLCG2/CX3CL1/IL16/IL27RA/IL6R/TLR4/NOD2/TLR2/STAT3/F2R/TLR8/TLR1/TNFSF4/IL10/C5AR2/PTAFR/IL17RA/TYROBP	25	biological process
GO:0032675	regulation of interleukin-6 production	25/247	165/18723	1.53e-19	4.22e-18	2.52e-18	CD74/IFNG/TLR3/TLR7/SYK/INPP5D/PTPN6/PLCG2/CX3CL1/IL16/IL27RA/IL6R/TLR4/NOD2/TLR2/STAT3/F2R/TLR8/TLR1/TNFSF4/IL10/C5AR2/PTAFR/IL17RA/TYROBP	25	biological process
GO:0071706	tumor necrosis factor superfamily cytokine production	26/247	186/18723	2.25e-19	6.11e-18	3.66e-18	IFNG/TLR3/IL12B/ARG2/CCL19/JAK2/SYK/PTPN6/PLCG2/CX3CL1/CX3CR1/IL27RA/PTPRC/RASGRP1/TLR4/NOD2/TLR2/CYBB/STAT3/TLR1/CD14/IL10/CD86/C5AR2/PTAFR/TYROBP	26	biological process
GO:1903555	regulation of tumor necrosis factor superfamily cytokine production	26/247	186/18723	2.25e-19	6.11e-18	3.66e-18	IFNG/TLR3/IL12B/ARG2/CCL19/JAK2/SYK/PTPN6/PLCG2/CX3CL1/CX3CR1/IL27RA/PTPRC/RASGRP1/TLR4/NOD2/TLR2/CYBB/STAT3/TLR1/CD14/IL10/CD86/C5AR2/PTAFR/TYROBP	26	biological process
GO:0002275	myeloid cell activation involved in immune response	20/247	91/18723	3.34e-19	9.02e-18	5.39e-18	IFNG/PTGDS/PIK3CG/SYK/BTK/RAC2/PIK3CD/PLCG2/CX3CR1/LAT/RASGRP1/FCER1G/GRN/HMOX1/FGR/PTGDR/PTAFR/ITGB2/TYROBP/CBL	20	biological process
GO:0019882	antigen processing and presentation	21/247	106/18723	4.21e-19	1.13e-17	6.74e-18	B2M/CD1A/CD1B/CD1C/CD1D/CD1E/CD8A/CD74/MR1/TAPBPL/CCL19/CCR7/CCL21/FCGR2B/CTSL/CTSS/FCER1G/ICAM1/LGMN/RELB/NOD2	21	biological process
GO:0046632	alpha-beta T cell differentiation	21/247	112/18723	1.41e-18	3.74e-17	2.24e-17	IFNG/SOCS1/IRF1/IL12B/CCL19/SYK/SEMA4A/TNFSF8/IL12RB1/IL18R1/IL6R/PTGER4/ZAP70/ITK/CTSL/RELB/STAT3/TNFSF4/CD86/MALT1/RHOA	21	biological process
GO:0032640	tumor necrosis factor production	25/247	181/18723	1.53e-18	3.98e-17	2.38e-17	IFNG/TLR3/IL12B/ARG2/CCL19/JAK2/SYK/PTPN6/PLCG2/CX3CL1/CX3CR1/IL27RA/PTPRC/RASGRP1/TLR4/NOD2/TLR2/CYBB/STAT3/TLR1/CD14/IL10/C5AR2/PTAFR/TYROBP	25	biological process
GO:0032680	regulation of tumor necrosis factor production	25/247	181/18723	1.53e-18	3.98e-17	2.38e-17	IFNG/TLR3/IL12B/ARG2/CCL19/JAK2/SYK/PTPN6/PLCG2/CX3CL1/CX3CR1/IL27RA/PTPRC/RASGRP1/TLR4/NOD2/TLR2/CYBB/STAT3/TLR1/CD14/IL10/C5AR2/PTAFR/TYROBP	25	biological process
GO:0097696	receptor signaling pathway via STAT	25/247	181/18723	1.53e-18	3.98e-17	2.38e-17	IFNG/STAT1/SOCS1/IL15/CD40/CCL5/IL12B/IL7R/JAK2/CRLF3/CSF1R/FLT3/IL10RA/IL22RA2/IL6R/TNFRSF18/PTPRC/HAMP/IFNAR1/TGFB1/STAT3/F2R/JAK1/IFNAR2/IL10	25	biological process
GO:0002709	regulation of T cell mediated immunity	19/247	85/18723	1.89e-18	4.87e-17	2.91e-17	B2M/CD1A/CD1B/CD1C/CD1D/CD1E/MR1/XCL1/IL12B/IL7R/FCGR2B/IL12RB1/IL18R1/PTPRC/KLRD1/NOD2/TNFSF4/MALT1/TNFRSF1B	19	biological process
GO:0071622	regulation of granulocyte chemotaxis	16/247	51/18723	2.46e-18	6.29e-17	3.76e-17	CD74/XCL1/CCL5/CCL19/CCR7/CCL21/PTK2/RAC2/CMKLR1/CSF1/CSF1R/NOD2/MAPK1/C5AR1/C5AR2/C3AR1	16	biological process
GO:0045621	positive regulation of lymphocyte differentiation	20/247	104/18723	5.61e-18	1.43e-16	8.52e-17	CD74/IFNG/SOCS1/IL15/IL12B/IL7R/CCL19/SYK/BTK/INPP5D/IL12RB1/ZAP70/PTPRC/RASGRP1/TNFSF4/IL10/CD86/MALT1/IL2RA/RHOA	20	biological process
GO:0032755	positive regulation of interleukin-6 production	19/247	93/18723	1.16e-17	2.93e-16	1.75e-16	CD74/IFNG/TLR3/TLR7/SYK/PLCG2/IL16/IL6R/TLR4/NOD2/TLR2/STAT3/F2R/TLR8/TLR1/TNFSF4/PTAFR/IL17RA/TYROBP	19	biological process
GO:0046635	positive regulation of alpha-beta T cell activation	17/247	67/18723	1.2e-17	2.99e-16	1.79e-16	IFNG/XCL1/SOCS1/IL12B/CCL19/SYK/EBI3/IL12RB1/ZAP70/CD3E/PTPRC/CD28/PRKCQ/TNFSF4/CD86/MALT1/RHOA	17	biological process
GO:0050851	antigen receptor-mediated signaling pathway	27/247	240/18723	1.33e-17	3.32e-16	1.98e-16	CCR7/TXK/CD79A/CD79B/SYK/BTK/NFATC2/CD19/PIK3CD/INPP5D/CD22/PTPN6/FCGR2B/PLCG2/LCK/CD247/ZAP70/SH2D1A/CD3E/PTPRC/ITK/CD28/CTLA4/MAPK1/MALT1/CMTM3/LCP2	27	biological process
GO:0019932	second-messenger-mediated signaling	30/247	312/18723	1.61e-17	3.97e-16	2.37e-16	CD4/CCR10/CCR6/VCAM1/CCR7/CCR8/CCR5/CXCR4/CXCR6/CCR4/SYK/BTK/NFATC2/CD22/PLCG2/CMKLR1/CX3CR1/CXCR3/CXCR5/XCR1/ZAP70/LAT/CD3E/PTPRC/CCL4/CCR3/CCR1/PPP3CC/EDN3/CCRL2	30	biological process
GO:0071347	cellular response to interleukin-1	20/247	113/18723	3.14e-17	7.68e-16	4.59e-16	XCL1/CD40/CCL5/GBP2/CCL19/CCL17/CCL21/CX3CL1/ICAM1/CAMP/CCL13/CCL8/NFKB1/CCL4/TANK/CCL16/CCL18/CCL26/CCL22/CCL23	20	biological process
GO:0001914	regulation of T cell mediated cytotoxicity	14/247	39/18723	3.76e-17	9.14e-16	5.47e-16	B2M/CD1A/CD1B/CD1C/CD1D/CD1E/MR1/XCL1/IL12B/IL7R/FCGR2B/IL12RB1/PTPRC/KLRD1	14	biological process
GO:0045089	positive regulation of innate immune response	21/247	131/18723	4.12e-17	9.96e-16	5.95e-16	CD1D/KIR2DL4/CCL5/IL12B/TXK/SYK/VAV1/PLCG2/NCR3/SH2D1B/SH2D1A/RASGRP1/KLRD1/RAET1E/TLR4/NOD2/TLR8/TBK1/HCK/IL18RAP/TYROBP	21	biological process
GO:0001913	T cell mediated cytotoxicity	15/247	49/18723	4.4e-17	1.06e-15	6.31e-16	B2M/CD1A/CD1B/CD1C/CD1D/CD1E/MR1/XCL1/IL12B/IL7R/FCGR2B/IL12RB1/PRF1/PTPRC/KLRD1	15	biological process
GO:0071675	regulation of mononuclear cell migration	20/247	115/18723	4.5e-17	1.07e-15	6.41e-16	CXCL10/CXCL13/XCL1/CCL5/CCR6/CCR7/CCL21/PTK2/CMKLR1/CX3CR1/CSF1/CSF1R/IL27RA/LGMN/MAPK1/CCL4/CCR1/C5AR1/C3AR1/RHOA	20	biological process
GO:0032729	positive regulation of interferon-gamma production	17/247	72/18723	4.54e-17	1.07e-15	6.42e-16	LTA/TLR3/TLR7/IL12B/TXK/EBI3/IL12RB1/IL18R1/IL27RA/CD244/CD3E/RASGRP1/TLR4/TLR8/CD14/TNFSF4/IL12RB2	17	biological process
GO:0002833	positive regulation of response to biotic stimulus	23/247	168/18723	4.68e-17	1.1e-15	6.56e-16	CD1D/MR1/KIR2DL4/CCL5/IL12B/TXK/SYK/VAV1/PLCG2/NCR3/SH2D1B/SH2D1A/RASGRP1/KLRD1/RAET1E/TLR4/NOD2/TLR8/GRN/TBK1/HCK/IL18RAP/TYROBP	23	biological process
GO:0007259	receptor signaling pathway via JAK-STAT	23/247	170/18723	6.12e-17	1.43e-15	8.53e-16	IFNG/STAT1/SOCS1/IL15/CD40/CCL5/IL12B/JAK2/CRLF3/CSF1R/FLT3/IL10RA/IL22RA2/IL6R/TNFRSF18/PTPRC/HAMP/IFNAR1/STAT3/F2R/JAK1/IFNAR2/IL10	23	biological process
GO:0033674	positive regulation of kinase activity	35/247	467/18723	7.43e-17	1.72e-15	1.03e-15	CD4/CD74/IFNG/TLR3/SOCS1/CD40/CCL5/IL12B/PIK3CG/CCL19/CCR7/CCL21/JAK2/PTK2/SYK/CD19/CSF1/ADRB2/CSF1R/FLT3/IL6R/LAT/PTPRC/RASGRP1/TGFB1/TLR4/NOD2/NOX4/FGR/CD86/MALT1/PIK3R5/EDN3/LCP2/RHOA	35	biological process
GO:0007249	I-kappaB kinase/NF-kappaB signaling	28/247	281/18723	8.07e-17	1.86e-15	1.11e-15	CD4/CD74/TLR3/STAT1/CD40/TLR7/TRIM22/FASLG/CCL19/CCR7/CCL21/BTK/PLCG2/CX3CL1/CX3CR1/ESR1/RELB/TLR4/NOD2/TLR2/F2R/TLR8/HMOX1/TANK/TBK1/MALT1/SECTM1/RHOA	28	biological process
GO:0045860	positive regulation of protein kinase activity	32/247	386/18723	9.77e-17	2.23e-15	1.33e-15	CD4/IFNG/TLR3/SOCS1/CD40/CCL5/IL12B/PIK3CG/CCL19/CCR7/CCL21/JAK2/PTK2/SYK/CSF1/ADRB2/CSF1R/FLT3/IL6R/LAT/PTPRC/RASGRP1/TGFB1/TLR4/NOD2/NOX4/CD86/MALT1/PIK3R5/EDN3/LCP2/RHOA	32	biological process
GO:0046634	regulation of alpha-beta T cell activation	19/247	104/18723	1.07e-16	2.43e-15	1.45e-15	IFNG/XCL1/SOCS1/IRF1/IL12B/ARG2/CCL19/SYK/EBI3/IL12RB1/ZAP70/CD3E/PTPRC/CD28/PRKCQ/TNFSF4/CD86/MALT1/RHOA	19	biological process
GO:0042116	macrophage activation	19/247	106/18723	1.55e-16	3.48e-15	2.08e-15	CD74/IFNG/TLR3/JAK2/SYK/FCGR2B/PLCG2/CX3CL1/CX3CR1/PTPRC/HAMP/TLR4/TLR2/GRN/TLR1/IL10/C5AR1/ITGB2/TYROBP	19	biological process
GO:0071887	leukocyte apoptotic process	19/247	106/18723	1.55e-16	3.48e-15	2.08e-15	CD74/IDO1/CCL5/IL7R/PDCD1/ARG2/FASLG/CCL19/CCR7/CCL21/BTK/PIK3CD/FAS/CD3G/PRKCQ/CTSL/NOD2/IL10/IL2RA	19	biological process
GO:0050864	regulation of B cell activation	24/247	198/18723	1.65e-16	3.66e-15	2.19e-15	CD74/CD40/SYK/BTK/NFATC2/CD19/INPP5D/CD22/PTPN6/FCGR2B/TNFSF13B/IL27RA/TNFRSF13B/PTPRC/CD28/CTLA4/TGFB1/TLR4/NOD2/TNFSF4/IL10/INHBA/TNFRSF4/TYROBP	24	biological process
GO:1903557	positive regulation of tumor necrosis factor superfamily cytokine production	19/247	107/18723	1.87e-16	4.13e-15	2.47e-15	IFNG/TLR3/IL12B/CCL19/JAK2/SYK/PLCG2/PTPRC/RASGRP1/TLR4/NOD2/TLR2/CYBB/STAT3/TLR1/CD14/CD86/PTAFR/TYROBP	19	biological process
GO:0050729	positive regulation of inflammatory response	21/247	142/18723	2.27e-16	4.98e-15	2.98e-15	IFNG/LTA/TLR3/IL15/TLR7/IL12B/PIK3CG/CCR7/JAK2/BTK/PLCG2/CX3CL1/IL16/PTGER4/CD28/TLR4/TLR2/GRN/TNFSF4/IL17RA/OSMR	21	biological process
GO:0072678	T cell migration	16/247	66/18723	2.46e-16	5.37e-15	3.21e-15	CXCL10/CXCL11/CXCL13/XCL1/CCL5/CCR6/PIK3CG/CCL21/PIK3CD/CXCR3/IL27RA/ITGAL/ZAP70/ICAM1/CCL26/RHOA	16	biological process
GO:0031295	T cell costimulation	14/247	44/18723	2.7e-16	5.86e-15	3.51e-15	CD40LG/CCL19/CCR7/CCL21/VAV1/PTPN6/TNFSF13B/LCK/CD3E/CD28/ICOS/TNFSF4/CD86/TNFSF14	14	biological process
GO:0048872	homeostasis of number of cells	27/247	272/18723	3.26e-16	7.03e-15	4.21e-15	B2M/CD74/STAT1/IL7R/CCR7/CCR4/JAK2/PIK3CD/INPP5D/CX3CR1/CSF1/TNFSF13B/FLT3/TNFRSF13B/TNFRSF17/LAT/FAS/HAMP/STAT3/F2R/PRDX2/HMOX1/INHBA/TNFSF14/IL2RA/MPL/THRA	27	biological process
GO:0045580	regulation of T cell differentiation	21/247	146/18723	4.05e-16	8.68e-15	5.19e-15	CD74/IFNG/SOCS1/IRF1/IL15/IL12B/IL7R/CCL19/SYK/IL12RB1/ZAP70/PTPRC/CD28/CTLA4/RASGRP1/PRDX2/TNFSF4/CD86/MALT1/IL2RA/RHOA	21	biological process
GO:0002695	negative regulation of leukocyte activation	23/247	187/18723	5.21e-16	1.11e-14	6.64e-15	CD74/XCL1/SOCS1/IRF1/ARG2/BTK/INPP5D/PTPN6/FCGR2B/CX3CL1/TNFRSF13B/PTPRC/CTLA4/GRN/PRDX2/HMOX1/TNFSF4/IL10/FGR/CD86/INHBA/IL2RA/TYROBP	23	biological process
GO:0031294	lymphocyte costimulation	14/247	46/18723	5.51e-16	1.17e-14	6.97e-15	CD40LG/CCL19/CCR7/CCL21/VAV1/PTPN6/TNFSF13B/LCK/CD3E/CD28/ICOS/TNFSF4/CD86/TNFSF14	14	biological process
GO:0002286	T cell activation involved in immune response	19/247	114/18723	6.41e-16	1.35e-14	8.06e-15	CD1C/CD74/IFNG/IL12B/CCL19/FCGR2B/SEMA4A/IL12RB1/IL18R1/IL6R/PTGER4/ITGAL/FCER1G/ICAM1/RELB/STAT3/TNFSF4/CD86/MALT1	19	biological process
GO:0050777	negative regulation of immune response	23/247	194/18723	1.18e-15	2.47e-14	1.47e-14	KIR2DL4/MICB/XCL1/IL12B/IL7R/PDCD1/ARG2/SYK/CR2/INPP5D/PTPN6/FCGR2B/IL27RA/PTPRC/CTLA4/KLRD1/NOD2/GRN/HMOX1/TNFSF4/IL10/FGR/HCK	23	biological process
GO:0035710	CD4-positive, alpha-beta T cell activation	18/247	102/18723	1.33e-15	2.76e-14	1.65e-14	IFNG/XCL1/SOCS1/IL12B/ARG2/CCL19/SEMA4A/IL12RB1/IL18R1/IL6R/PTGER4/PRKCQ/CTSL/RELB/STAT3/TNFSF4/CD86/MALT1	18	biological process
GO:0043299	leukocyte degranulation	16/247	73/18723	1.4e-15	2.88e-14	1.72e-14	PTGDS/PIK3CG/SYK/BTK/RAC2/PIK3CD/FCGR2B/LAT/RASGRP1/HMOX1/FGR/PTGDR/HCK/PTAFR/ITGB2/CBL	16	biological process
GO:0050730	regulation of peptidyl-tyrosine phosphorylation	26/247	264/18723	1.44e-15	2.96e-14	1.77e-14	CD4/CD74/IFNG/SOCS1/IL15/CD40/CCL5/IL12B/JAK2/SYK/PTPN6/PLCG2/SEMA4D/CSF1R/FLT3/IL22RA2/IL6R/TNFRSF18/CD3E/PTPRC/ICAM1/TGFB1/NOD2/NOX4/ITGB2/CBL	26	biological process
GO:0032760	positive regulation of tumor necrosis factor production	18/247	103/18723	1.59e-15	3.25e-14	1.94e-14	IFNG/TLR3/IL12B/CCL19/JAK2/SYK/PLCG2/PTPRC/RASGRP1/TLR4/NOD2/TLR2/CYBB/STAT3/TLR1/CD14/PTAFR/TYROBP	18	biological process
GO:0002437	inflammatory response to antigenic stimulus	16/247	74/18723	1.76e-15	3.57e-14	2.13e-14	LTA/IL12B/CCR7/SYK/BTK/FCGR2B/CYSLTR1/IL5RA/CD28/RASGRP1/ICAM1/NOD2/IL10/FGR/HCK/IL2RA	16	biological process
GO:0070555	response to interleukin-1	20/247	143/18723	3.64e-15	7.34e-14	4.39e-14	XCL1/CD40/CCL5/GBP2/CCL19/CCL17/CCL21/CX3CL1/ICAM1/CAMP/CCL13/CCL8/NFKB1/CCL4/TANK/CCL16/CCL18/CCL26/CCL22/CCL23	20	biological process
GO:0030888	regulation of B cell proliferation	15/247	64/18723	3.74e-15	7.5e-14	4.48e-14	CD74/CD40/BTK/NFATC2/INPP5D/CD22/FCGR2B/TNFSF13B/TNFRSF13B/PTPRC/CTLA4/TLR4/IL10/TNFRSF4/TYROBP	15	biological process
GO:0001818	negative regulation of cytokine production	29/247	357/18723	5.06e-15	1.01e-13	6.03e-14	IFNG/XCL1/TMSB4X/CYLD/IL12B/ARG2/CCR7/BTK/INPP5D/PTPN6/FCGR2B/CX3CL1/CMKLR1/CX3CR1/IL27RA/PTGER4/PTPRC/RELB/TGFB1/TLR4/NFKB1/NOD2/TLR8/HMOX1/TNFSF4/IL10/C5AR2/INHBA/TYROBP	29	biological process
GO:0050866	negative regulation of cell activation	23/247	210/18723	6.75e-15	1.34e-13	8e-14	CD74/XCL1/SOCS1/IRF1/ARG2/BTK/INPP5D/PTPN6/FCGR2B/CX3CL1/TNFRSF13B/PTPRC/CTLA4/GRN/PRDX2/HMOX1/TNFSF4/IL10/FGR/CD86/INHBA/IL2RA/TYROBP	23	biological process
GO:0006968	cellular defense response	14/247	54/18723	6.79e-15	1.34e-13	8e-14	KIR2DL4/KLRC3/CXCL9/CCR6/GNLY/CCR5/CX3CR1/NCR1/SH2D1A/PRF1/ITK/CCR3/C5AR1/TYROBP	14	biological process
GO:0002440	production of molecular mediator of immune response	27/247	308/18723	7.26e-15	1.42e-13	8.5e-14	B2M/CD74/KIR2DL4/XCL1/TLR3/CD40/CCR6/CD40LG/BTK/CD22/FCGR2B/PLCG2/IL18R1/IL27RA/CD244/PTPRC/CD28/TGFB1/TLR4/NOD2/HMOX1/TNFSF4/IL10/CD86/MALT1/TNFRSF1B/TNFRSF4	27	biological process
GO:0002711	positive regulation of T cell mediated immunity	14/247	56/18723	1.19e-14	2.31e-13	1.38e-13	B2M/CD1A/CD1B/CD1C/CD1D/CD1E/MR1/XCL1/IL12B/IL12RB1/IL18R1/PTPRC/TNFSF4/MALT1	14	biological process
GO:0002444	myeloid leukocyte mediated immunity	17/247	99/18723	1.35e-14	2.61e-13	1.56e-13	PTGDS/PIK3CG/SYK/BTK/RAC2/PIK3CD/FCGR2B/CX3CR1/LAT/RASGRP1/HMOX1/FGR/PTGDR/PTAFR/ITGB2/TYROBP/CBL	17	biological process
GO:0002702	positive regulation of production of molecular mediator of immune response	18/247	117/18723	1.64e-14	3.15e-13	1.89e-13	B2M/CD74/KIR2DL4/XCL1/CD40/PLCG2/IL18R1/CD244/PTPRC/CD28/TGFB1/TLR4/NOD2/TNFSF4/IL10/CD86/MALT1/TNFRSF4	18	biological process
GO:0032677	regulation of interleukin-8 production	17/247	102/18723	2.26e-14	4.33e-13	2.59e-13	CD74/TMSB4X/TLR3/TLR7/SYK/CD244/PTPRC/TLR4/NOD2/TLR2/STAT3/F2R/TLR8/TLR1/CD14/IL10/C5AR2	17	biological process
GO:0019884	antigen processing and presentation of exogenous antigen	13/247	47/18723	2.52e-14	4.81e-13	2.87e-13	B2M/CD1A/CD1B/CD1C/CD1D/CD1E/CD74/MR1/FCGR2B/CTSL/CTSS/FCER1G/LGMN	13	biological process
GO:0032637	interleukin-8 production	17/247	103/18723	2.68e-14	5.07e-13	3.03e-13	CD74/TMSB4X/TLR3/TLR7/SYK/CD244/PTPRC/TLR4/NOD2/TLR2/STAT3/F2R/TLR8/TLR1/CD14/IL10/C5AR2	17	biological process
GO:0002712	regulation of B cell mediated immunity	14/247	60/18723	3.38e-14	6.34e-13	3.79e-13	LTA/XCL1/CD40/BTK/CR2/PTPN6/FCGR2B/IL27RA/PTPRC/CD28/TGFB1/NOD2/TNFSF4/IL10	14	biological process
GO:0002889	regulation of immunoglobulin mediated immune response	14/247	60/18723	3.38e-14	6.34e-13	3.79e-13	LTA/XCL1/CD40/BTK/CR2/PTPN6/FCGR2B/IL27RA/PTPRC/CD28/TGFB1/NOD2/TNFSF4/IL10	14	biological process
GO:0030183	B cell differentiation	19/247	141/18723	3.65e-14	6.8e-13	4.07e-13	CD40LG/VCAM1/CD79A/CD79B/SYK/BTK/CD19/CR2/INPP5D/PTPN6/FCGR2B/PLCG2/CMTM7/TNFSF13B/FLT3/PTPRC/IL10/MALT1/INHBA	19	biological process
GO:0050852	T cell receptor signaling pathway	18/247	123/18723	4.03e-14	7.47e-13	4.47e-13	CCR7/TXK/PIK3CD/INPP5D/PTPN6/PLCG2/LCK/CD247/ZAP70/SH2D1A/CD3E/PTPRC/ITK/CD28/CTLA4/MAPK1/MALT1/LCP2	18	biological process
GO:0046633	alpha-beta T cell proliferation	12/247	38/18723	4.25e-14	7.83e-13	4.68e-13	XCL1/IRF1/IL15/IL12B/ARG2/SYK/EBI3/ZAP70/CD3E/PTPRC/CD28/TNFSF4	12	biological process
GO:0001916	positive regulation of T cell mediated cytotoxicity	11/247	29/18723	4.73e-14	8.67e-13	5.18e-13	B2M/CD1A/CD1B/CD1C/CD1D/CD1E/MR1/XCL1/IL12B/IL12RB1/PTPRC	11	biological process
GO:0016064	immunoglobulin mediated immune response	22/247	207/18723	5.01e-14	9.13e-13	5.46e-13	B2M/CD74/LTA/XCL1/CD40/CCR6/CD40LG/BTK/CD19/CR2/INPP5D/PTPN6/FCGR2B/IL27RA/PTPRC/CD28/FCER1G/TGFB1/NOD2/TLR8/TNFSF4/IL10	22	biological process
GO:0045582	positive regulation of T cell differentiation	16/247	91/18723	5.59e-14	1.01e-12	6.06e-13	CD74/IFNG/SOCS1/IL12B/IL7R/CCL19/SYK/IL12RB1/ZAP70/PTPRC/RASGRP1/TNFSF4/CD86/MALT1/IL2RA/RHOA	16	biological process
GO:0019724	B cell mediated immunity	22/247	210/18723	6.75e-14	1.22e-12	7.29e-13	B2M/CD74/LTA/XCL1/CD40/CCR6/CD40LG/BTK/CD19/CR2/INPP5D/PTPN6/FCGR2B/IL27RA/PTPRC/CD28/FCER1G/TGFB1/NOD2/TLR8/TNFSF4/IL10	22	biological process
GO:0050731	positive regulation of peptidyl-tyrosine phosphorylation	21/247	193/18723	1.21e-13	2.14e-12	1.28e-12	CD4/CD74/IFNG/IL15/CD40/CCL5/IL12B/JAK2/SYK/PLCG2/SEMA4D/CSF1R/FLT3/IL6R/TNFRSF18/CD3E/PTPRC/ICAM1/TGFB1/NOD2/NOX4	21	biological process
GO:0051607	defense response to virus	24/247	265/18723	1.21e-13	2.14e-12	1.28e-12	IFNG/MICB/CXCL10/CXCL9/APOBEC3G/TLR3/STAT1/IRF1/IL15/APOBEC3F/CD40/TLR7/IRF5/IL12B/APOBEC3C/TRIM22/IL12RB1/PRF1/PTPRC/TLR2/TLR8/IFNAR2/TBK1/RNASE2	24	biological process
GO:0140546	defense response to symbiont	24/247	265/18723	1.21e-13	2.14e-12	1.28e-12	IFNG/MICB/CXCL10/CXCL9/APOBEC3G/TLR3/STAT1/IRF1/IL15/APOBEC3F/CD40/TLR7/IRF5/IL12B/APOBEC3C/TRIM22/IL12RB1/PRF1/PTPRC/TLR2/TLR8/IFNAR2/TBK1/RNASE2	24	biological process
GO:0002718	regulation of cytokine production involved in immune response	16/247	96/18723	1.34e-13	2.37e-12	1.42e-12	B2M/CD74/KIR2DL4/XCL1/TLR3/BTK/PLCG2/IL18R1/TGFB1/TLR4/NOD2/HMOX1/TNFSF4/IL10/MALT1/TNFRSF1B	16	biological process
GO:2000106	regulation of leukocyte apoptotic process	15/247	81/18723	1.57e-13	2.75e-12	1.64e-12	CD74/IDO1/CCL5/IL7R/PDCD1/ARG2/CCL19/CCR7/CCL21/BTK/PIK3CD/CD3G/PRKCQ/NOD2/IL10	15	biological process
GO:0051090	regulation of DNA-binding transcription factor activity	30/247	440/18723	1.72e-13	3.01e-12	1.8e-12	XCL1/TMSB4X/TLR3/CD40/CYLD/CD40LG/TRIM22/JAK2/SYK/BTK/PLCG2/CX3CL1/CMKLR1/CX3CR1/ESR1/IL18R1/PRKCQ/ICAM1/TLR4/NOD2/TLR2/STAT3/PRDX2/HMOX1/TNFSF4/IL10/HCK/MALT1/IL18RAP/TNFRSF4	30	biological process
GO:0051209	release of sequestered calcium ion into cytosol	17/247	115/18723	1.77e-13	3.07e-12	1.84e-12	CXCL10/CXCL9/CXCL11/XCL1/FASLG/CCL19/CCR7/CCL21/CCR5/CD19/PTPN6/PLCG2/CX3CL1/XCR1/LCK/PTPRC/F2R	17	biological process
GO:0030099	myeloid cell differentiation	28/247	381/18723	1.87e-13	3.23e-12	1.93e-12	B2M/CD4/CD74/IFNG/TLR3/STAT1/IL15/IL12B/CCL19/CCR7/JAK2/PIK3CD/INPP5D/PTPN6/CSF1/CSF1R/RELB/TGFB1/MMP9/TLR4/TLR2/STAT3/CCR1/LILRB3/INHBA/MPL/THRA/TYROBP	28	biological process
GO:0002367	cytokine production involved in immune response	16/247	98/18723	1.87e-13	3.23e-12	1.93e-12	B2M/CD74/KIR2DL4/XCL1/TLR3/BTK/PLCG2/IL18R1/TGFB1/TLR4/NOD2/HMOX1/TNFSF4/IL10/MALT1/TNFRSF1B	16	biological process
GO:0051283	negative regulation of sequestering of calcium ion	17/247	116/18723	2.05e-13	3.51e-12	2.1e-12	CXCL10/CXCL9/CXCL11/XCL1/FASLG/CCL19/CCR7/CCL21/CCR5/CD19/PTPN6/PLCG2/CX3CL1/XCR1/LCK/PTPRC/F2R	17	biological process
GO:0043367	CD4-positive, alpha-beta T cell differentiation	15/247	83/18723	2.28e-13	3.9e-12	2.33e-12	IFNG/SOCS1/IL12B/CCL19/SEMA4A/IL12RB1/IL18R1/IL6R/PTGER4/CTSL/RELB/STAT3/TNFSF4/CD86/MALT1	15	biological process
GO:0051250	negative regulation of lymphocyte activation	19/247	157/18723	2.67e-13	4.53e-12	2.71e-12	CD74/XCL1/SOCS1/IRF1/ARG2/BTK/INPP5D/PTPN6/FCGR2B/TNFRSF13B/CTLA4/PRDX2/TNFSF4/IL10/FGR/CD86/INHBA/IL2RA/TYROBP	19	biological process
GO:0051282	regulation of sequestering of calcium ion	17/247	118/18723	2.73e-13	4.61e-12	2.76e-12	CXCL10/CXCL9/CXCL11/XCL1/FASLG/CCL19/CCR7/CCL21/CCR5/CD19/PTPN6/PLCG2/CX3CL1/XCR1/LCK/PTPRC/F2R	17	biological process
GO:0051208	sequestering of calcium ion	17/247	122/18723	4.79e-13	8.05e-12	4.81e-12	CXCL10/CXCL9/CXCL11/XCL1/FASLG/CCL19/CCR7/CCL21/CCR5/CD19/PTPN6/PLCG2/CX3CL1/XCR1/LCK/PTPRC/F2R	17	biological process
GO:0002573	myeloid leukocyte differentiation	21/247	208/18723	5.3e-13	8.85e-12	5.29e-12	CD4/CD74/IFNG/TLR3/IL15/IL12B/CCL19/CCR7/PIK3CD/INPP5D/CSF1/CSF1R/RELB/TGFB1/MMP9/TLR4/TLR2/CCR1/LILRB3/INHBA/TYROBP	21	biological process
GO:0046640	regulation of alpha-beta T cell proliferation	11/247	35/18723	5.32e-13	8.85e-12	5.29e-12	XCL1/IRF1/IL12B/ARG2/SYK/EBI3/ZAP70/CD3E/PTPRC/CD28/TNFSF4	11	biological process
GO:1905523	positive regulation of macrophage migration	10/247	26/18723	5.87e-13	9.73e-12	5.82e-12	CCL5/PTK2/CX3CL1/CMKLR1/CX3CR1/CSF1/CSF1R/MAPK1/C5AR1/C3AR1	10	biological process
GO:0001774	microglial cell activation	12/247	47/18723	7.39e-13	1.22e-11	7.28e-12	IFNG/TLR3/JAK2/CX3CL1/CX3CR1/PTPRC/TLR2/GRN/TLR1/C5AR1/ITGB2/TYROBP	12	biological process
GO:0002292	T cell differentiation involved in immune response	14/247	75/18723	9.18e-13	1.5e-11	9e-12	IFNG/IL12B/CCL19/SEMA4A/IL12RB1/IL18R1/IL6R/PTGER4/FCER1G/RELB/STAT3/TNFSF4/CD86/MALT1	14	biological process
GO:0043303	mast cell degranulation	12/247	48/18723	9.73e-13	1.59e-11	9.5e-12	PTGDS/PIK3CG/SYK/BTK/RAC2/PIK3CD/LAT/RASGRP1/HMOX1/FGR/PTGDR/CBL	12	biological process
GO:0043368	positive T cell selection	11/247	37/18723	1.07e-12	1.73e-11	1.03e-11	CD74/IL12B/IL12RB1/IL6R/ZAP70/CD3D/CD3E/CD3G/PTPRC/CTSL/STAT3	11	biological process
GO:0002698	negative regulation of immune effector process	16/247	110/18723	1.2e-12	1.94e-11	1.16e-11	KIR2DL4/XCL1/IL7R/CR2/CD22/PTPN6/FCGR2B/CX3CR1/PTPRC/KLRD1/TGFB1/NOD2/GRN/HMOX1/TNFSF4/IL10	16	biological process
GO:0032613	interleukin-10 production	13/247	62/18723	1.25e-12	1.99e-11	1.19e-11	XCL1/IL12B/CD40LG/SYK/FCGR2B/PLCG2/CD28/TLR4/NOD2/TLR2/STAT3/TNFSF4/TYROBP	13	biological process
GO:0032653	regulation of interleukin-10 production	13/247	62/18723	1.25e-12	1.99e-11	1.19e-11	XCL1/IL12B/CD40LG/SYK/FCGR2B/PLCG2/CD28/TLR4/NOD2/TLR2/STAT3/TNFSF4/TYROBP	13	biological process
GO:0032757	positive regulation of interleukin-8 production	13/247	62/18723	1.25e-12	1.99e-11	1.19e-11	CD74/TLR3/TLR7/SYK/CD244/TLR4/NOD2/TLR2/STAT3/F2R/TLR8/TLR1/CD14	13	biological process
GO:0045576	mast cell activation	13/247	62/18723	1.25e-12	1.99e-11	1.19e-11	PTGDS/PIK3CG/SYK/BTK/RAC2/PIK3CD/LAT/RASGRP1/HMOX1/FGR/PTGDR/LCP2/CBL	13	biological process
GO:0002279	mast cell activation involved in immune response	12/247	49/18723	1.27e-12	2.01e-11	1.2e-11	PTGDS/PIK3CG/SYK/BTK/RAC2/PIK3CD/LAT/RASGRP1/HMOX1/FGR/PTGDR/CBL	12	biological process
GO:0010818	T cell chemotaxis	10/247	28/18723	1.42e-12	2.23e-11	1.33e-11	CXCL10/CXCL11/CXCL13/XCL1/CCL5/PIK3CG/CCL21/PIK3CD/CXCR3/CCL26	10	biological process
GO:0050853	B cell receptor signaling pathway	17/247	131/18723	1.57e-12	2.46e-11	1.47e-11	CD79A/CD79B/SYK/BTK/NFATC2/CD19/PIK3CD/CD22/PTPN6/FCGR2B/PLCG2/LCK/PTPRC/ITK/CTLA4/MAPK1/CMTM3	17	biological process
GO:0002448	mast cell mediated immunity	12/247	50/18723	1.66e-12	2.58e-11	1.54e-11	PTGDS/PIK3CG/SYK/BTK/RAC2/PIK3CD/LAT/RASGRP1/HMOX1/FGR/PTGDR/CBL	12	biological process
GO:0032479	regulation of type I interferon production	15/247	95/18723	1.8e-12	2.78e-11	1.66e-11	TLR3/STAT1/IRF1/TLR7/CYLD/IRF5/SYK/PLCG2/RELB/TLR4/TLR2/TLR8/CD14/TBK1/IL10	15	biological process
GO:0032606	type I interferon production	15/247	95/18723	1.8e-12	2.78e-11	1.66e-11	TLR3/STAT1/IRF1/TLR7/CYLD/IRF5/SYK/PLCG2/RELB/TLR4/TLR2/TLR8/CD14/TBK1/IL10	15	biological process
GO:0043122	regulation of I-kappaB kinase/NF-kappaB signaling	22/247	249/18723	2.19e-12	3.36e-11	2.01e-11	CD4/CD74/TLR3/STAT1/CD40/TRIM22/FASLG/CCL19/CCR7/CCL21/PLCG2/CX3CL1/ESR1/TLR4/NOD2/F2R/HMOX1/TANK/TBK1/MALT1/SECTM1/RHOA	22	biological process
GO:0006816	calcium ion transport	28/247	422/18723	2.26e-12	3.45e-11	2.06e-11	CD4/CXCL10/CXCL9/CXCL11/XCL1/CCL5/PIK3CG/FASLG/CCL19/CCR7/CCL21/CCR5/CXCR4/CD19/PTPN6/PLCG2/CX3CL1/CYSLTR1/XCR1/IL16/LCK/PTPRC/ICAM1/CCL8/F2R/CCL4/CCR1/RHOA	28	biological process
GO:0046641	positive regulation of alpha-beta T cell proliferation	9/247	21/18723	2.68e-12	4.08e-11	2.44e-11	XCL1/IL12B/SYK/EBI3/ZAP70/CD3E/PTPRC/CD28/TNFSF4	9	biological process
GO:0032642	regulation of chemokine production	15/247	98/18723	2.88e-12	4.37e-11	2.61e-11	CD74/IFNG/TLR3/TLR7/ARG2/SYK/CSF1R/IL6R/TLR4/NOD2/TLR2/HMOX1/TNFSF4/IL10/IL17RA	15	biological process
GO:0032602	chemokine production	15/247	99/18723	3.35e-12	5.06e-11	3.03e-11	CD74/IFNG/TLR3/TLR7/ARG2/SYK/CSF1R/IL6R/TLR4/NOD2/TLR2/HMOX1/TNFSF4/IL10/IL17RA	15	biological process
GO:0043547	positive regulation of GTPase activity	22/247	255/18723	3.52e-12	5.3e-11	3.17e-11	CXCL13/XCL1/CD40/CCL5/CCL19/CCL17/CCR7/CCL21/VAV1/CX3CL1/SEMA4D/RASGRP1/ICAM1/CCL13/CCL8/F2R/CCL4/CCL16/CCL18/CCL26/CCL22/CCL23	22	biological process
GO:0032733	positive regulation of interleukin-10 production	11/247	41/18723	3.76e-12	5.62e-11	3.36e-11	XCL1/IL12B/CD40LG/SYK/PLCG2/CD28/TLR4/NOD2/TLR2/STAT3/TNFSF4	11	biological process
GO:0002294	CD4-positive, alpha-beta T cell differentiation involved in immune response	13/247	68/18723	4.41e-12	6.57e-11	3.93e-11	IFNG/IL12B/CCL19/SEMA4A/IL12RB1/IL18R1/IL6R/PTGER4/RELB/STAT3/TNFSF4/CD86/MALT1	13	biological process
GO:0002717	positive regulation of natural killer cell mediated immunity	10/247	31/18723	4.63e-12	6.87e-11	4.11e-11	KIR2DL4/IL12B/VAV1/NCR3/SH2D1B/SH2D1A/RASGRP1/KLRD1/RAET1E/IL18RAP	10	biological process
GO:0002287	alpha-beta T cell activation involved in immune response	13/247	69/18723	5.37e-12	7.89e-11	4.72e-11	IFNG/IL12B/CCL19/SEMA4A/IL12RB1/IL18R1/IL6R/PTGER4/RELB/STAT3/TNFSF4/CD86/MALT1	13	biological process
GO:0002293	alpha-beta T cell differentiation involved in immune response	13/247	69/18723	5.37e-12	7.89e-11	4.72e-11	IFNG/IL12B/CCL19/SEMA4A/IL12RB1/IL18R1/IL6R/PTGER4/RELB/STAT3/TNFSF4/CD86/MALT1	13	biological process
GO:0097553	calcium ion transmembrane import into cytosol	17/247	142/18723	5.95e-12	8.71e-11	5.21e-11	CXCL10/CXCL9/CXCL11/XCL1/FASLG/CCL19/CCR7/CCL21/CCR5/CD19/PTPN6/PLCG2/CX3CL1/XCR1/LCK/PTPRC/F2R	17	biological process
GO:0043087	regulation of GTPase activity	25/247	348/18723	6.54e-12	9.53e-11	5.7e-11	CXCL13/XCL1/CD40/CCL5/CCL19/CCL17/CCR7/CCL21/PTK2/VAV1/RASGRP3/CX3CL1/SEMA4D/RASGRP1/ICAM1/CCL13/CCL8/F2R/CCL4/CCL16/CCL18/CCL26/CCL22/CCL23/PLXNC1	25	biological process
GO:0090022	regulation of neutrophil chemotaxis	10/247	32/18723	6.66e-12	9.59e-11	5.73e-11	CD74/XCL1/CCL19/CCR7/CCL21/RAC2/NOD2/C5AR1/C5AR2/C3AR1	10	biological process
GO:1901214	regulation of neuron death	24/247	319/18723	6.66e-12	9.59e-11	5.73e-11	IFNG/CCL5/FASLG/JAK2/FCGR2B/CX3CL1/CX3CR1/CSF1/LGMN/TLR4/STAT3/F2R/GRN/HMOX1/TBK1/IL10/C5AR1/NENF/CNTFR/TNFRSF1B/ITGB2/TYROBP/RHOA/CBL	24	biological process
GO:0002861	regulation of inflammatory response to antigenic stimulus	11/247	43/18723	6.68e-12	9.59e-11	5.73e-11	LTA/IL12B/CCR7/SYK/BTK/FCGR2B/CD28/NOD2/IL10/FGR/HCK	11	biological process
GO:0042088	T-helper 1 type immune response	11/247	43/18723	6.68e-12	9.59e-11	5.73e-11	XCL1/IL12B/CCL19/SEMA4A/EBI3/IL12RB1/IL18R1/IL27RA/RELB/TLR4/TNFSF4	11	biological process
GO:0042742	defense response to bacterium	25/247	350/18723	7.41e-12	1.06e-10	6.33e-11	CD4/MR1/LTA/CXCL13/TLR3/IL12B/GNLY/IL7R/ARG2/GBP2/SYK/TNFSF8/IL27RA/IL6R/FCER1G/HAMP/CAMP/TLR4/NOD2/TLR2/GRN/TBK1/IL10/FGR/C5AR1	25	biological process
GO:0002228	natural killer cell mediated immunity	13/247	71/18723	7.88e-12	1.12e-10	6.67e-11	KIR2DL4/IL12B/VAV1/PTPN6/NCR1/NCR3/SH2D1B/SH2D1A/GZMB/RASGRP1/KLRD1/RAET1E/IL18RAP	13	biological process
GO:0032722	positive regulation of chemokine production	13/247	71/18723	7.88e-12	1.12e-10	6.67e-11	CD74/IFNG/TLR3/TLR7/SYK/CSF1R/IL6R/TLR4/NOD2/TLR2/HMOX1/TNFSF4/IL17RA	13	biological process
GO:0070227	lymphocyte apoptotic process	13/247	72/18723	9.51e-12	1.34e-10	8.02e-11	CD74/IDO1/CCL5/IL7R/PDCD1/ARG2/FASLG/BTK/FAS/CD3G/PRKCQ/IL10/IL2RA	13	biological process
GO:0032481	positive regulation of type I interferon production	12/247	58/18723	1.11e-11	1.56e-10	9.31e-11	TLR3/STAT1/IRF1/TLR7/IRF5/SYK/PLCG2/TLR4/TLR2/TLR8/CD14/TBK1	12	biological process
GO:0002637	regulation of immunoglobulin production	13/247	73/18723	1.14e-11	1.6e-10	9.56e-11	XCL1/CD40/CD40LG/CD22/FCGR2B/IL27RA/PTPRC/CD28/TGFB1/TNFSF4/IL10/CD86/TNFRSF4	13	biological process
GO:0032612	interleukin-1 production	16/247	128/18723	1.3e-11	1.8e-10	1.08e-10	IFNG/ARG2/CCL19/CCR7/JAK2/CX3CL1/CX3CR1/IL16/TLR4/NOD2/STAT3/F2R/TLR8/IL10/MALT1/TYROBP	16	biological process
GO:0032652	regulation of interleukin-1 production	16/247	128/18723	1.3e-11	1.8e-10	1.08e-10	IFNG/ARG2/CCL19/CCR7/JAK2/CX3CL1/CX3CR1/IL16/TLR4/NOD2/STAT3/F2R/TLR8/IL10/MALT1/TYROBP	16	biological process
GO:0070997	neuron death	25/247	361/18723	1.45e-11	2.01e-10	1.2e-10	IFNG/CCL5/FASLG/JAK2/FCGR2B/CX3CL1/CX3CR1/CSF1/FAS/LGMN/TLR4/STAT3/F2R/GRN/HMOX1/TBK1/IL10/C5AR1/NENF/CNTFR/TNFRSF1B/ITGB2/TYROBP/RHOA/CBL	25	biological process
GO:0033077	T cell differentiation in thymus	13/247	75/18723	1.64e-11	2.26e-10	1.35e-10	B2M/CD74/MR1/CCR6/IL7R/CCR7/ZAP70/CD3D/CD3E/CD3G/PTPRC/CD28/RASGRP1	13	biological process
GO:0031663	lipopolysaccharide-mediated signaling pathway	12/247	60/18723	1.7e-11	2.33e-10	1.39e-10	CCL5/PLCG2/CX3CL1/TGFB1/TLR4/TLR2/MAPK1/PRDX2/CD14/HCK/MALT1/PTAFR	12	biological process
GO:0051092	positive regulation of NF-kappaB transcription factor activity	17/247	152/18723	1.8e-11	2.46e-10	1.47e-10	TLR3/CD40/CD40LG/TRIM22/BTK/PLCG2/CX3CL1/CX3CR1/IL18R1/PRKCQ/ICAM1/TLR4/NOD2/TLR2/STAT3/MALT1/IL18RAP	17	biological process
GO:0006909	phagocytosis	23/247	308/18723	2.18e-11	2.96e-10	1.77e-10	IFNG/IL15/PTK2/SYK/VAV1/RAC2/FCGR2B/PLCG2/IL2RB/IL2RG/ITGAL/PTPRC/FCER1G/TLR4/NOD2/TLR2/MSR1/MARCO/CD14/FGR/HCK/ITGB2/TYROBP	23	biological process
GO:0002715	regulation of natural killer cell mediated immunity	11/247	48/18723	2.48e-11	3.36e-10	2.01e-10	KIR2DL4/IL12B/VAV1/NCR1/NCR3/SH2D1B/SH2D1A/RASGRP1/KLRD1/RAET1E/IL18RAP	11	biological process
GO:0042119	neutrophil activation	10/247	36/18723	2.5e-11	3.38e-10	2.02e-10	IL15/CCL5/SYK/FCGR2B/FCER1G/GRN/PTAFR/IL18RAP/ITGB2/TYROBP	10	biological process
GO:0002407	dendritic cell chemotaxis	9/247	26/18723	2.69e-11	3.61e-10	2.16e-10	CCL5/CCR6/PIK3CG/CCL19/CCR7/CCL21/CCR5/CXCR4/CCR1	9	biological process
GO:1904894	positive regulation of receptor signaling pathway via STAT	11/247	49/18723	3.16e-11	4.23e-10	2.53e-10	SOCS1/CCL5/IL12B/IL7R/JAK2/CRLF3/IL10RA/IL6R/TGFB1/F2R/IL10	11	biological process
GO:0038093	Fc receptor signaling pathway	11/247	50/18723	4e-11	5.32e-10	3.18e-10	PTK2/SYK/BTK/VAV1/FCGR2B/PLCG2/PTPRC/PRKCQ/FCER1G/FGR/HCK	11	biological process
GO:0046638	positive regulation of alpha-beta T cell differentiation	11/247	50/18723	4e-11	5.32e-10	3.18e-10	IFNG/SOCS1/IL12B/CCL19/SYK/IL12RB1/ZAP70/TNFSF4/CD86/MALT1/RHOA	11	biological process
GO:0060402	calcium ion transport into cytosol	17/247	160/18723	4.12e-11	5.45e-10	3.26e-10	CXCL10/CXCL9/CXCL11/XCL1/FASLG/CCL19/CCR7/CCL21/CCR5/CD19/PTPN6/PLCG2/CX3CL1/XCR1/LCK/PTPRC/F2R	17	biological process
GO:0071677	positive regulation of mononuclear cell migration	12/247	65/18723	4.62e-11	6.09e-10	3.64e-10	CXCL10/CXCL13/XCL1/CCL5/CCR6/CCR7/CCL21/CX3CR1/LGMN/CCL4/CCR1/RHOA	12	biological process
GO:0043123	positive regulation of I-kappaB kinase/NF-kappaB signaling	18/247	186/18723	5.22e-11	6.85e-10	4.1e-10	CD4/CD74/TLR3/CD40/TRIM22/FASLG/CCL19/CCR7/CCL21/CX3CL1/TLR4/NOD2/F2R/HMOX1/TBK1/MALT1/SECTM1/RHOA	18	biological process
GO:0002312	B cell activation involved in immune response	13/247	82/18723	5.32e-11	6.96e-10	4.16e-10	CD40/CCR6/CD40LG/CD19/FCGR2B/PLCG2/IL27RA/PTPRC/CD28/TGFB1/TLR4/TNFSF4/IL10	13	biological process
GO:0010759	positive regulation of macrophage chemotaxis	8/247	19/18723	5.46e-11	7.12e-10	4.26e-10	CCL5/PTK2/CMKLR1/CSF1/CSF1R/MAPK1/C5AR1/C3AR1	8	biological process
GO:0042093	T-helper cell differentiation	12/247	66/18723	5.58e-11	7.24e-10	4.33e-10	IL12B/CCL19/SEMA4A/IL12RB1/IL18R1/IL6R/PTGER4/RELB/STAT3/TNFSF4/CD86/MALT1	12	biological process
GO:2000516	positive regulation of CD4-positive, alpha-beta T cell activation	10/247	39/18723	6.05e-11	7.82e-10	4.68e-10	IFNG/XCL1/SOCS1/IL12B/CCL19/IL12RB1/PRKCQ/TNFSF4/CD86/MALT1	10	biological process
GO:0032102	negative regulation of response to external stimulus	26/247	420/18723	6.72e-11	8.65e-10	5.17e-10	KIR2DL4/MICB/CXCL13/IL12B/ARG2/SYK/FCGR2B/CX3CL1/SEMA4A/SEMA4D/IL22RA2/PTGER4/PTPRC/KLRD1/HAMP/NFKB1/NOD2/GRN/PRDX2/IL10/FGR/HCK/C5AR2/NENF/IL2RA/TNFRSF1B	26	biological process
GO:0051651	maintenance of location in cell	19/247	214/18723	6.74e-11	8.65e-10	5.17e-10	CD4/CXCL10/CXCL9/CXCL11/XCL1/TMSB4X/FASLG/CCL19/CCR7/CCL21/CCR5/CD19/PTPN6/PLCG2/CX3CL1/XCR1/LCK/PTPRC/F2R	19	biological process
GO:0038061	NIK/NF-kappaB signaling	16/247	143/18723	7.14e-11	9.13e-10	5.46e-10	TMSB4X/TLR3/TLR7/CYLD/IL12B/CCL19/IL18R1/RELB/TLR4/NOD2/TLR2/CD14/CD86/MALT1/TNFSF14/RHOA	16	biological process
GO:0042267	natural killer cell mediated cytotoxicity	12/247	68/18723	8.06e-11	1.03e-09	6.14e-10	KIR2DL4/IL12B/VAV1/PTPN6/NCR1/NCR3/SH2D1A/GZMB/RASGRP1/KLRD1/RAET1E/IL18RAP	12	biological process
GO:0030168	platelet activation	15/247	123/18723	8.25e-11	1.05e-09	6.26e-10	CD40/CD40LG/PIK3CG/JAK2/TXK/SYK/VAV1/PTPN6/PLCG2/LCK/PRKCQ/FCER1G/TLR4/F2R/MPL	15	biological process
GO:1901224	positive regulation of NIK/NF-kappaB signaling	12/247	69/18723	9.64e-11	1.22e-09	7.29e-10	TLR3/TLR7/IL12B/CCL19/IL18R1/TLR4/NOD2/TLR2/CD14/CD86/TNFSF14/RHOA	12	biological process
GO:0007162	negative regulation of cell adhesion	22/247	303/18723	1.04e-10	1.3e-09	7.8e-10	CD74/XCL1/SOCS1/IRF1/ARG2/CCL21/JAK2/PTK2/PTPN6/FCGR2B/CX3CL1/SEMA4D/PTPRC/CTLA4/TGFB1/PRDX2/TNFSF4/IL10/CD86/PLXNC1/IL2RA/RHOA	22	biological process
GO:1902622	regulation of neutrophil migration	10/247	41/18723	1.04e-10	1.3e-09	7.8e-10	CD74/XCL1/CCL19/CCR7/CCL21/RAC2/NOD2/C5AR1/C5AR2/C3AR1	10	biological process
GO:1905521	regulation of macrophage migration	10/247	41/18723	1.04e-10	1.3e-09	7.8e-10	CCL5/PTK2/CX3CL1/CMKLR1/CX3CR1/CSF1/CSF1R/MAPK1/C5AR1/C3AR1	10	biological process
GO:0002381	immunoglobulin production involved in immunoglobulin-mediated immune response	12/247	70/18723	1.15e-10	1.43e-09	8.57e-10	B2M/XCL1/CD40/CCR6/CD40LG/BTK/IL27RA/PTPRC/CD28/TGFB1/TNFSF4/IL10	12	biological process
GO:0036230	granulocyte activation	10/247	43/18723	1.74e-10	2.16e-09	1.29e-09	IL15/CCL5/SYK/FCGR2B/FCER1G/GRN/PTAFR/IL18RAP/ITGB2/TYROBP	10	biological process
GO:0070664	negative regulation of leukocyte proliferation	13/247	90/18723	1.79e-10	2.21e-09	1.32e-09	XCL1/ARG2/BTK/INPP5D/PTPN6/FCGR2B/TNFRSF13B/CTLA4/CCL8/IL10/CD86/IL2RA/TYROBP	13	biological process
GO:0032611	interleukin-1 beta production	14/247	110/18723	2e-10	2.45e-09	1.47e-09	IFNG/ARG2/CCL19/CCR7/JAK2/CX3CL1/CX3CR1/TLR4/NOD2/STAT3/F2R/TLR8/MALT1/TYROBP	14	biological process
GO:0032651	regulation of interleukin-1 beta production	14/247	110/18723	2e-10	2.45e-09	1.47e-09	IFNG/ARG2/CCL19/CCR7/JAK2/CX3CL1/CX3CR1/TLR4/NOD2/STAT3/F2R/TLR8/MALT1/TYROBP	14	biological process
GO:0032620	interleukin-17 production	10/247	44/18723	2.23e-10	2.7e-09	1.62e-09	IFNG/IL15/IL12B/ARG2/IL27RA/PRKCQ/TGFB1/TLR4/NOD2/TNFSF4	10	biological process
GO:0032660	regulation of interleukin-17 production	10/247	44/18723	2.23e-10	2.7e-09	1.62e-09	IFNG/IL15/IL12B/ARG2/IL27RA/PRKCQ/TGFB1/TLR4/NOD2/TNFSF4	10	biological process
GO:0042269	regulation of natural killer cell mediated cytotoxicity	10/247	44/18723	2.23e-10	2.7e-09	1.62e-09	KIR2DL4/IL12B/VAV1/NCR1/NCR3/SH2D1A/RASGRP1/KLRD1/RAET1E/IL18RAP	10	biological process
GO:0045061	thymic T cell selection	8/247	22/18723	2.23e-10	2.7e-09	1.62e-09	CD74/CCR7/ZAP70/CD3D/CD3E/CD3G/PTPRC/CD28	8	biological process
GO:0048015	phosphatidylinositol-mediated signaling	17/247	178/18723	2.24e-10	2.7e-09	1.62e-09	CCL5/PIK3CG/JAK2/PTK2/PIK3CD/PTPN6/SEMA4D/CSF1R/FLT3/HCST/CD28/RASGRP1/F2R/FGR/PIK3R5/PTAFR/CBL	17	biological process
GO:0031348	negative regulation of defense response	20/247	258/18723	2.4e-10	2.89e-09	1.73e-09	KIR2DL4/MICB/IL12B/ARG2/SYK/FCGR2B/CX3CL1/IL22RA2/PTGER4/PTPRC/KLRD1/HAMP/NFKB1/NOD2/GRN/IL10/FGR/HCK/IL2RA/TNFRSF1B	20	biological process
GO:1901222	regulation of NIK/NF-kappaB signaling	14/247	112/18723	2.55e-10	3.06e-09	1.83e-09	TMSB4X/TLR3/TLR7/CYLD/IL12B/CCL19/IL18R1/TLR4/NOD2/TLR2/CD14/CD86/TNFSF14/RHOA	14	biological process
GO:0043551	regulation of phosphatidylinositol 3-kinase activity	11/247	59/18723	2.7e-10	3.23e-09	1.93e-09	SOCS1/CCL19/CCR7/CCL21/PTK2/CD19/FLT3/TGFB1/NOD2/FGR/PIK3R5	11	biological process
GO:0051091	positive regulation of DNA-binding transcription factor activity	20/247	260/18723	2.76e-10	3.28e-09	1.96e-09	TLR3/CD40/CD40LG/TRIM22/JAK2/BTK/PLCG2/CX3CL1/CX3CR1/ESR1/IL18R1/PRKCQ/ICAM1/TLR4/NOD2/TLR2/STAT3/IL10/MALT1/IL18RAP	20	biological process
GO:0036336	dendritic cell migration	9/247	33/18723	3.06e-10	3.62e-09	2.16e-09	CCL5/CCR6/PIK3CG/CCL19/CCR7/CCL21/CCR5/CXCR4/CCR1	9	biological process
GO:0043552	positive regulation of phosphatidylinositol 3-kinase activity	9/247	33/18723	3.06e-10	3.62e-09	2.16e-09	CCL19/CCR7/CCL21/PTK2/CD19/FLT3/TGFB1/NOD2/FGR	9	biological process
GO:0048017	inositol lipid-mediated signaling	17/247	182/18723	3.17e-10	3.73e-09	2.23e-09	CCL5/PIK3CG/JAK2/PTK2/PIK3CD/PTPN6/SEMA4D/CSF1R/FLT3/HCST/CD28/RASGRP1/F2R/FGR/PIK3R5/PTAFR/CBL	17	biological process
GO:0060401	cytosolic calcium ion transport	17/247	182/18723	3.17e-10	3.73e-09	2.23e-09	CXCL10/CXCL9/CXCL11/XCL1/FASLG/CCL19/CCR7/CCL21/CCR5/CD19/PTPN6/PLCG2/CX3CL1/XCR1/LCK/PTPRC/F2R	17	biological process
GO:0072677	eosinophil migration	8/247	23/18723	3.39e-10	3.96e-09	2.37e-09	CCL5/CCL21/CX3CL1/PTGER4/CCL13/CCL8/CCL4/CCL26	8	biological process
GO:0050764	regulation of phagocytosis	13/247	95/18723	3.58e-10	4.17e-09	2.49e-09	IFNG/IL15/SYK/FCGR2B/PLCG2/IL2RB/IL2RG/PTPRC/FCER1G/NOD2/TLR2/FGR/HCK	13	biological process
GO:0032418	lysosome localization	12/247	77/18723	3.66e-10	4.26e-09	2.54e-09	PTGDS/PIK3CG/SYK/BTK/RAC2/PIK3CD/LAT/RASGRP1/HMOX1/FGR/PTGDR/CBL	12	biological process
GO:0051235	maintenance of location	22/247	327/18723	4.47e-10	5.17e-09	3.09e-09	CD4/CXCL10/CXCL9/CXCL11/XCL1/TMSB4X/FASLG/CCL19/CCR7/CCL21/CCR5/CD19/PTPN6/PLCG2/CX3CL1/XCR1/LCK/PTPRC/NFKB1/F2R/MSR1/IL10	22	biological process
GO:0090023	positive regulation of neutrophil chemotaxis	8/247	24/18723	5.02e-10	5.8e-09	3.46e-09	CD74/XCL1/CCL19/CCR7/CCL21/RAC2/C5AR1/C3AR1	8	biological process
GO:0002704	negative regulation of leukocyte mediated immunity	11/247	63/18723	5.67e-10	6.53e-09	3.9e-09	KIR2DL4/XCL1/IL7R/CR2/PTPN6/FCGR2B/CX3CR1/PTPRC/KLRD1/NOD2/HMOX1	11	biological process
GO:0002224	toll-like receptor signaling pathway	14/247	121/18723	7.24e-10	8.3e-09	4.96e-09	TLR3/IRF1/CD40/TLR7/BTK/PLCG2/ESR1/CTSS/TLR4/NOD2/TLR2/TLR8/TLR1/CD14	14	biological process
GO:0032753	positive regulation of interleukin-4 production	8/247	25/18723	7.3e-10	8.34e-09	4.99e-09	CD40LG/SYK/CD3E/CD28/PRKCQ/FCER1G/TNFSF4/CD86	8	biological process
GO:0014065	phosphatidylinositol 3-kinase signaling	15/247	144/18723	7.85e-10	8.94e-09	5.34e-09	CCL5/PIK3CG/JAK2/PTK2/PIK3CD/PTPN6/SEMA4D/FLT3/HCST/CD28/RASGRP1/F2R/FGR/PIK3R5/CBL	15	biological process
GO:0050672	negative regulation of lymphocyte proliferation	12/247	83/18723	9e-10	1.02e-08	6.11e-09	XCL1/ARG2/BTK/INPP5D/PTPN6/FCGR2B/TNFRSF13B/CTLA4/IL10/CD86/IL2RA/TYROBP	12	biological process
GO:0090218	positive regulation of lipid kinase activity	9/247	37/18723	9.43e-10	1.07e-08	6.38e-09	CCL19/CCR7/CCL21/PTK2/CD19/FLT3/TGFB1/NOD2/FGR	9	biological process
GO:0045639	positive regulation of myeloid cell differentiation	13/247	103/18723	9.99e-10	1.13e-08	6.74e-09	CD4/CD74/IFNG/STAT1/IL12B/INPP5D/CSF1/TGFB1/STAT3/CCR1/INHBA/MPL/TYROBP	13	biological process
GO:0022408	negative regulation of cell-cell adhesion	17/247	196/18723	1e-09	1.13e-08	6.75e-09	CD74/XCL1/SOCS1/IRF1/ARG2/CCL21/JAK2/PTK2/PTPN6/FCGR2B/CTLA4/TGFB1/PRDX2/TNFSF4/IL10/CD86/IL2RA	17	biological process
GO:0032945	negative regulation of mononuclear cell proliferation	12/247	84/18723	1.04e-09	1.16e-08	6.95e-09	XCL1/ARG2/BTK/INPP5D/PTPN6/FCGR2B/TNFRSF13B/CTLA4/IL10/CD86/IL2RA/TYROBP	12	biological process
GO:0045954	positive regulation of natural killer cell mediated cytotoxicity	8/247	26/18723	1.04e-09	1.16e-08	6.96e-09	IL12B/VAV1/NCR3/SH2D1A/RASGRP1/KLRD1/RAET1E/IL18RAP	8	biological process
GO:2000514	regulation of CD4-positive, alpha-beta T cell activation	11/247	67/18723	1.13e-09	1.26e-08	7.52e-09	IFNG/XCL1/SOCS1/IL12B/ARG2/CCL19/IL12RB1/PRKCQ/TNFSF4/CD86/MALT1	11	biological process
GO:0042509	regulation of tyrosine phosphorylation of STAT protein	12/247	85/18723	1.19e-09	1.33e-08	7.92e-09	IFNG/SOCS1/IL15/CD40/CCL5/IL12B/JAK2/CSF1R/FLT3/IL22RA2/IL6R/TNFRSF18	12	biological process
GO:0046637	regulation of alpha-beta T cell differentiation	11/247	68/18723	1.33e-09	1.47e-08	8.81e-09	IFNG/SOCS1/IL12B/CCL19/SYK/IL12RB1/ZAP70/TNFSF4/CD86/MALT1/RHOA	11	biological process
GO:0010758	regulation of macrophage chemotaxis	8/247	27/18723	1.46e-09	1.6e-08	9.59e-09	CCL5/PTK2/CMKLR1/CSF1/CSF1R/MAPK1/C5AR1/C3AR1	8	biological process
GO:0060333	interferon-gamma-mediated signaling pathway	8/247	27/18723	1.46e-09	1.6e-08	9.59e-09	IFNG/STAT1/SOCS1/IRF1/JAK2/TXK/JAK1/HCK	8	biological process
GO:0071624	positive regulation of granulocyte chemotaxis	8/247	27/18723	1.46e-09	1.6e-08	9.59e-09	CD74/XCL1/CCL19/CCR7/CCL21/RAC2/C5AR1/C3AR1	8	biological process
GO:0050728	negative regulation of inflammatory response	16/247	176/18723	1.59e-09	1.74e-08	1.04e-08	IL12B/SYK/FCGR2B/CX3CL1/IL22RA2/PTGER4/PTPRC/HAMP/NFKB1/NOD2/GRN/IL10/FGR/HCK/IL2RA/TNFRSF1B	16	biological process
GO:0050871	positive regulation of B cell activation	15/247	152/18723	1.68e-09	1.82e-08	1.09e-08	CD74/CD40/SYK/BTK/NFATC2/INPP5D/TNFSF13B/PTPRC/CD28/TGFB1/TLR4/NOD2/TNFSF4/IL10/TNFRSF4	15	biological process
GO:0030889	negative regulation of B cell proliferation	7/247	18/18723	1.8e-09	1.94e-08	1.16e-08	BTK/INPP5D/FCGR2B/TNFRSF13B/CTLA4/IL10/TYROBP	7	biological process
GO:0007260	tyrosine phosphorylation of STAT protein	12/247	88/18723	1.8e-09	1.94e-08	1.16e-08	IFNG/SOCS1/IL15/CD40/CCL5/IL12B/JAK2/CSF1R/FLT3/IL22RA2/IL6R/TNFRSF18	12	biological process
GO:0030101	natural killer cell activation	12/247	88/18723	1.8e-09	1.94e-08	1.16e-08	IL15/IL12B/PIK3CD/IL18R1/IL21R/NCR1/NCR3/CD244/PTPRC/RASGRP1/FGR/TYROBP	12	biological process
GO:0045123	cellular extravasation	11/247	70/18723	1.84e-09	1.97e-08	1.18e-08	PIK3CG/VCAM1/CCL21/PIK3CD/CX3CL1/CX3CR1/IL27RA/PTGER4/ITGAL/ICAM1/PTAFR	11	biological process
GO:0002823	negative regulation of adaptive immune response based on somatic recombination of immune receptors built from immunoglobulin superfamily domains	10/247	54/18723	1.91e-09	2.04e-08	1.22e-08	XCL1/IL7R/CR2/PTPN6/FCGR2B/IL27RA/PTPRC/KLRD1/NOD2/TNFSF4	10	biological process
GO:0070228	regulation of lymphocyte apoptotic process	10/247	54/18723	1.91e-09	2.04e-08	1.22e-08	CD74/IDO1/CCL5/IL7R/PDCD1/ARG2/BTK/CD3G/PRKCQ/IL10	10	biological process
GO:0002714	positive regulation of B cell mediated immunity	9/247	40/18723	2e-09	2.13e-08	1.27e-08	LTA/XCL1/CD40/BTK/PTPRC/CD28/TGFB1/NOD2/TNFSF4	9	biological process
GO:0002891	positive regulation of immunoglobulin mediated immune response	9/247	40/18723	2e-09	2.13e-08	1.27e-08	LTA/XCL1/CD40/BTK/PTPRC/CD28/TGFB1/NOD2/TNFSF4	9	biological process
GO:0032607	interferon-alpha production	8/247	28/18723	2.03e-09	2.13e-08	1.27e-08	TLR3/STAT1/TLR7/IRF5/TLR4/TLR8/TBK1/IL10	8	biological process
GO:0032647	regulation of interferon-alpha production	8/247	28/18723	2.03e-09	2.13e-08	1.27e-08	TLR3/STAT1/TLR7/IRF5/TLR4/TLR8/TBK1/IL10	8	biological process
GO:0038094	Fc-gamma receptor signaling pathway	8/247	28/18723	2.03e-09	2.13e-08	1.27e-08	PTK2/SYK/VAV1/FCGR2B/PTPRC/FCER1G/FGR/HCK	8	biological process
GO:1902624	positive regulation of neutrophil migration	8/247	28/18723	2.03e-09	2.13e-08	1.27e-08	CD74/XCL1/CCL19/CCR7/CCL21/RAC2/C5AR1/C3AR1	8	biological process
GO:0043550	regulation of lipid kinase activity	11/247	71/18723	2.15e-09	2.25e-08	1.34e-08	SOCS1/CCL19/CCR7/CCL21/PTK2/CD19/FLT3/TGFB1/NOD2/FGR/PIK3R5	11	biological process
GO:0002604	regulation of dendritic cell antigen processing and presentation	6/247	11/18723	2.17e-09	2.25e-08	1.35e-08	CD74/CCL19/CCR7/CCL21/FCGR2B/NOD2	6	biological process
GO:0045060	negative thymic T cell selection	6/247	11/18723	2.17e-09	2.25e-08	1.35e-08	CD74/CCR7/ZAP70/CD3E/PTPRC/CD28	6	biological process
GO:0048660	regulation of smooth muscle cell proliferation	16/247	180/18723	2.21e-09	2.29e-08	1.37e-08	IFNG/STAT1/IL15/CCL5/IL12B/JAK2/CX3CL1/IL6R/S1PR2/TGFB1/MMP9/TLR4/HMOX1/IL10/PTAFR/RHOA	16	biological process
GO:1905517	macrophage migration	10/247	55/18723	2.31e-09	2.39e-08	1.43e-08	CCL5/PTK2/CX3CL1/CMKLR1/CX3CR1/CSF1/CSF1R/MAPK1/C5AR1/C3AR1	10	biological process
GO:0002886	regulation of myeloid leukocyte mediated immunity	10/247	56/18723	2.78e-09	2.87e-08	1.71e-08	SYK/BTK/RAC2/FCGR2B/CX3CR1/HMOX1/FGR/PTAFR/ITGB2/TYROBP	10	biological process
GO:0048245	eosinophil chemotaxis	7/247	19/18723	2.81e-09	2.89e-08	1.73e-08	CCL5/CCL21/CX3CL1/CCL13/CCL8/CCL4/CCL26	7	biological process
GO:0045637	regulation of myeloid cell differentiation	17/247	210/18723	2.89e-09	2.96e-08	1.77e-08	B2M/CD4/CD74/IFNG/TLR3/STAT1/IL12B/INPP5D/CSF1/TGFB1/TLR4/STAT3/CCR1/LILRB3/INHBA/MPL/TYROBP	17	biological process
GO:0048659	smooth muscle cell proliferation	16/247	184/18723	3.05e-09	3.11e-08	1.86e-08	IFNG/STAT1/IL15/CCL5/IL12B/JAK2/CX3CL1/IL6R/S1PR2/TGFB1/MMP9/TLR4/HMOX1/IL10/PTAFR/RHOA	16	biological process
GO:1904892	regulation of receptor signaling pathway via STAT	13/247	114/18723	3.56e-09	3.62e-08	2.16e-08	IFNG/SOCS1/CCL5/IL12B/IL7R/JAK2/CRLF3/IL10RA/IL6R/PTPRC/TGFB1/F2R/IL10	13	biological process
GO:0002577	regulation of antigen processing and presentation	7/247	20/18723	4.28e-09	4.34e-08	2.59e-08	CD74/TAPBPL/CCL19/CCR7/CCL21/FCGR2B/NOD2	7	biological process
GO:0043383	negative T cell selection	6/247	12/18723	4.29e-09	4.34e-08	2.59e-08	CD74/CCR7/ZAP70/CD3E/PTPRC/CD28	6	biological process
GO:0002820	negative regulation of adaptive immune response	10/247	59/18723	4.74e-09	4.78e-08	2.86e-08	XCL1/IL7R/CR2/PTPN6/FCGR2B/IL27RA/PTPRC/KLRD1/NOD2/TNFSF4	10	biological process
GO:0010959	regulation of metal ion transport	23/247	406/18723	4.91e-09	4.94e-08	2.95e-08	B2M/CD4/IFNG/CXCL10/CXCL9/CXCL11/XCL1/CCL5/PIK3CG/CXCR4/CD19/PTPN6/PLCG2/CX3CL1/IL16/ADRB2/ICAM1/HAMP/F2R/CCL4/CCR1/EDN3/RHOA	23	biological process
GO:0046427	positive regulation of receptor signaling pathway via JAK-STAT	9/247	44/18723	4.96e-09	4.97e-08	2.97e-08	SOCS1/CCL5/IL12B/JAK2/CRLF3/IL10RA/IL6R/F2R/IL10	9	biological process
GO:1903038	negative regulation of leukocyte cell-cell adhesion	14/247	141/18723	5.47e-09	5.47e-08	3.27e-08	CD74/XCL1/SOCS1/IRF1/ARG2/CCL21/PTPN6/FCGR2B/CTLA4/PRDX2/TNFSF4/IL10/CD86/IL2RA	14	biological process
GO:0033002	muscle cell proliferation	18/247	248/18723	5.57e-09	5.55e-08	3.32e-08	IFNG/STAT1/IL15/CCL5/IL12B/JAK2/CX3CL1/IL6R/S1PR2/TGFB1/MMP9/TLR4/MAPK1/STAT3/HMOX1/IL10/PTAFR/RHOA	18	biological process
GO:0007252	I-kappaB phosphorylation	7/247	21/18723	6.35e-09	6.3e-08	3.77e-08	TLR3/TLR7/PLCG2/CX3CL1/CX3CR1/TLR4/TLR2	7	biological process
GO:0043372	positive regulation of CD4-positive, alpha-beta T cell differentiation	8/247	32/18723	6.55e-09	6.49e-08	3.88e-08	IFNG/SOCS1/IL12B/CCL19/IL12RB1/TNFSF4/CD86/MALT1	8	biological process
GO:0002761	regulation of myeloid leukocyte differentiation	13/247	120/18723	6.71e-09	6.63e-08	3.96e-08	CD4/CD74/IFNG/TLR3/IL12B/INPP5D/CSF1/TGFB1/TLR4/CCR1/LILRB3/INHBA/TYROBP	13	biological process
GO:0014068	positive regulation of phosphatidylinositol 3-kinase signaling	11/247	79/18723	6.91e-09	6.81e-08	4.07e-08	CCL5/JAK2/PTK2/PTPN6/SEMA4D/FLT3/HCST/CD28/F2R/FGR/CBL	11	biological process
GO:2000107	negative regulation of leukocyte apoptotic process	9/247	46/18723	7.53e-09	7.4e-08	4.42e-08	CD74/CCL5/IL7R/ARG2/CCL19/CCR7/CCL21/PRKCQ/NOD2	9	biological process
GO:0032623	interleukin-2 production	10/247	62/18723	7.84e-09	7.66e-08	4.58e-08	CD4/XCL1/PLCG2/CD3E/PTPRC/CD28/PRKCQ/NOD2/CD86/MALT1	10	biological process
GO:0032663	regulation of interleukin-2 production	10/247	62/18723	7.84e-09	7.66e-08	4.58e-08	CD4/XCL1/PLCG2/CD3E/PTPRC/CD28/PRKCQ/NOD2/CD86/MALT1	10	biological process
GO:0050868	negative regulation of T cell activation	13/247	122/18723	8.22e-09	8e-08	4.78e-08	CD74/XCL1/SOCS1/IRF1/ARG2/PTPN6/FCGR2B/CTLA4/PRDX2/TNFSF4/IL10/CD86/IL2RA	13	biological process
GO:0002431	Fc receptor mediated stimulatory signaling pathway	8/247	33/18723	8.55e-09	8.24e-08	4.93e-08	PTK2/SYK/VAV1/FCGR2B/PTPRC/FCER1G/FGR/HCK	8	biological process
GO:0032633	interleukin-4 production	8/247	33/18723	8.55e-09	8.24e-08	4.93e-08	CD40LG/SYK/CD3E/CD28/PRKCQ/FCER1G/TNFSF4/CD86	8	biological process
GO:0032673	regulation of interleukin-4 production	8/247	33/18723	8.55e-09	8.24e-08	4.93e-08	CD40LG/SYK/CD3E/CD28/PRKCQ/FCER1G/TNFSF4/CD86	8	biological process
GO:0006959	humoral immune response	20/247	317/18723	8.56e-09	8.24e-08	4.93e-08	IFNG/LTA/CXCL10/CXCL9/CXCL11/CXCL13/CCR6/GNLY/PDCD1/CCR7/CR2/PTPN6/FCGR2B/EBI3/SH2D1A/PTPRC/CD28/CAMP/CCL13/NOD2	20	biological process
GO:0051924	regulation of calcium ion transport	18/247	255/18723	8.62e-09	8.28e-08	4.95e-08	CD4/CXCL10/CXCL9/CXCL11/XCL1/CCL5/PIK3CG/CXCR4/CD19/PTPN6/PLCG2/CX3CL1/IL16/ICAM1/F2R/CCL4/CCR1/RHOA	18	biological process
GO:0050830	defense response to Gram-positive bacterium	12/247	101/18723	8.99e-09	8.6e-08	5.14e-08	MR1/LTA/IL7R/GBP2/TNFSF8/IL27RA/CAMP/NOD2/TLR2/TBK1/FGR/C5AR1	12	biological process
GO:0032727	positive regulation of interferon-alpha production	7/247	22/18723	9.2e-09	8.76e-08	5.24e-08	TLR3/STAT1/TLR7/IRF5/TLR4/TLR8/TBK1	7	biological process
GO:0050854	regulation of antigen receptor-mediated signaling pathway	10/247	63/18723	9.21e-09	8.76e-08	5.24e-08	CCR7/CD19/CD22/PTPN6/FCGR2B/LCK/SH2D1A/PTPRC/MALT1/CMTM3	10	biological process
GO:0002221	pattern recognition receptor signaling pathway	15/247	172/18723	9.23e-09	8.76e-08	5.24e-08	TLR3/IRF1/CD40/TLR7/CYLD/BTK/PLCG2/ESR1/CTSS/TLR4/NOD2/TLR2/TLR8/TLR1/CD14	15	biological process
GO:1902106	negative regulation of leukocyte differentiation	12/247	102/18723	1.01e-08	9.53e-08	5.7e-08	CD74/TLR3/SOCS1/IRF1/INPP5D/FCGR2B/CTLA4/TLR4/PRDX2/TNFSF4/LILRB3/INHBA	12	biological process
GO:0032743	positive regulation of interleukin-2 production	8/247	34/18723	1.11e-08	1.04e-07	6.23e-08	CD4/PLCG2/CD3E/PTPRC/CD28/PRKCQ/CD86/MALT1	8	biological process
GO:0050869	negative regulation of B cell activation	8/247	34/18723	1.11e-08	1.04e-07	6.23e-08	BTK/INPP5D/FCGR2B/TNFRSF13B/CTLA4/IL10/INHBA/TYROBP	8	biological process
GO:0044403	biological process involved in symbiotic interaction	19/247	290/18723	1.11e-08	1.04e-07	6.24e-08	CD4/CD74/CIITA/CCL5/TRIM22/CCR5/CXCR4/CR2/CX3CR1/CTSB/CTSL/ICAM1/CAMP/CCL8/CCL4/CD86/IGF2R/TNFRSF4/CBL	19	biological process
GO:0002720	positive regulation of cytokine production involved in immune response	10/247	65/18723	1.26e-08	1.18e-07	7.06e-08	B2M/CD74/KIR2DL4/XCL1/PLCG2/IL18R1/TLR4/NOD2/TNFSF4/MALT1	10	biological process
GO:0002204	somatic recombination of immunoglobulin genes involved in immune response	9/247	49/18723	1.36e-08	1.26e-07	7.51e-08	CD40/CCR6/CD40LG/IL27RA/PTPRC/CD28/TGFB1/TNFSF4/IL10	9	biological process
GO:0002208	somatic diversification of immunoglobulins involved in immune response	9/247	49/18723	1.36e-08	1.26e-07	7.51e-08	CD40/CCR6/CD40LG/IL27RA/PTPRC/CD28/TGFB1/TNFSF4/IL10	9	biological process
GO:0030225	macrophage differentiation	9/247	49/18723	1.36e-08	1.26e-07	7.51e-08	CD4/IFNG/IL15/CSF1/CSF1R/TGFB1/MMP9/TLR2/INHBA	9	biological process
GO:0045190	isotype switching	9/247	49/18723	1.36e-08	1.26e-07	7.51e-08	CD40/CCR6/CD40LG/IL27RA/PTPRC/CD28/TGFB1/TNFSF4/IL10	9	biological process
GO:0002475	antigen processing and presentation via MHC class Ib	6/247	14/18723	1.36e-08	1.26e-07	7.51e-08	B2M/CD1A/CD1B/CD1C/CD1D/CD1E	6	biological process
GO:0045059	positive thymic T cell selection	6/247	14/18723	1.36e-08	1.26e-07	7.51e-08	CD74/ZAP70/CD3D/CD3E/CD3G/PTPRC	6	biological process
GO:1903707	negative regulation of hemopoiesis	12/247	106/18723	1.57e-08	1.44e-07	8.6e-08	CD74/TLR3/SOCS1/IRF1/INPP5D/FCGR2B/CTLA4/TLR4/PRDX2/TNFSF4/LILRB3/INHBA	12	biological process
GO:0002639	positive regulation of immunoglobulin production	9/247	50/18723	1.64e-08	1.5e-07	8.94e-08	XCL1/CD40/PTPRC/CD28/TGFB1/TNFSF4/IL10/CD86/TNFRSF4	9	biological process
GO:0070231	T cell apoptotic process	9/247	50/18723	1.64e-08	1.5e-07	8.94e-08	IDO1/CCL5/IL7R/PDCD1/ARG2/FASLG/FAS/PRKCQ/IL2RA	9	biological process
GO:1901215	negative regulation of neuron death	16/247	208/18723	1.77e-08	1.62e-07	9.66e-08	JAK2/CX3CL1/CX3CR1/CSF1/LGMN/STAT3/F2R/GRN/HMOX1/IL10/C5AR1/NENF/CNTFR/TNFRSF1B/RHOA/CBL	16	biological process
GO:0042092	type 2 immune response	8/247	36/18723	1.8e-08	1.64e-07	9.8e-08	CD74/XCL1/ARG2/IL27RA/NOD2/TNFSF4/IL10/CD86	8	biological process
GO:0045766	positive regulation of angiogenesis	15/247	181/18723	1.84e-08	1.67e-07	9.97e-08	TLR3/CD40/CXCR4/PIK3CD/CX3CR1/CAMP/CYBB/STAT3/GRN/JAK1/HMOX1/CCR3/IL10/C5AR1/C3AR1	15	biological process
GO:1904018	positive regulation of vasculature development	15/247	181/18723	1.84e-08	1.67e-07	9.97e-08	TLR3/CD40/CXCR4/PIK3CD/CX3CR1/CAMP/CYBB/STAT3/GRN/JAK1/HMOX1/CCR3/IL10/C5AR1/C3AR1	15	biological process
GO:0001776	leukocyte homeostasis	11/247	87/18723	1.95e-08	1.76e-07	1.05e-07	CD74/PIK3CD/TNFSF13B/FLT3/TNFRSF13B/TNFRSF17/LAT/FAS/TNFSF14/IL2RA/MPL	11	biological process
GO:0042531	positive regulation of tyrosine phosphorylation of STAT protein	10/247	68/18723	1.98e-08	1.78e-07	1.06e-07	IFNG/IL15/CD40/CCL5/IL12B/JAK2/CSF1R/FLT3/IL6R/TNFRSF18	10	biological process
GO:0002468	dendritic cell antigen processing and presentation	6/247	15/18723	2.25e-08	2.02e-07	1.21e-07	CD74/CCL19/CCR7/CCL21/FCGR2B/NOD2	6	biological process
GO:0014066	regulation of phosphatidylinositol 3-kinase signaling	12/247	111/18723	2.65e-08	2.37e-07	1.42e-07	CCL5/JAK2/PTK2/PTPN6/SEMA4D/FLT3/HCST/CD28/RASGRP1/F2R/FGR/CBL	12	biological process
GO:0002707	negative regulation of lymphocyte mediated immunity	9/247	53/18723	2.8e-08	2.5e-07	1.49e-07	KIR2DL4/XCL1/IL7R/CR2/PTPN6/FCGR2B/PTPRC/KLRD1/NOD2	9	biological process
GO:0048246	macrophage chemotaxis	8/247	38/18723	2.85e-08	2.53e-07	1.52e-07	CCL5/PTK2/CMKLR1/CSF1/CSF1R/MAPK1/C5AR1/C3AR1	8	biological process
GO:0002377	immunoglobulin production	16/247	216/18723	3.02e-08	2.68e-07	1.6e-07	B2M/XCL1/CD40/CCR6/CD40LG/BTK/CD22/FCGR2B/IL27RA/PTPRC/CD28/TGFB1/TNFSF4/IL10/CD86/TNFRSF4	16	biological process
GO:0045765	regulation of angiogenesis	20/247	342/18723	3.05e-08	2.7e-07	1.62e-07	CXCL10/CXCL13/TLR3/STAT1/CD40/FASLG/CXCR4/PIK3CD/SEMA4A/CX3CR1/CAMP/CYBB/STAT3/GRN/JAK1/HMOX1/CCR3/IL10/C5AR1/C3AR1	20	biological process
GO:0007596	blood coagulation	16/247	217/18723	3.22e-08	2.85e-07	1.7e-07	CD40/CD40LG/PIK3CG/JAK2/TXK/SYK/VAV1/PTPN6/PLCG2/LCK/PRKCQ/FCER1G/TLR4/F2R/PRDX2/MPL	16	biological process
GO:0019883	antigen processing and presentation of endogenous antigen	7/247	26/18723	3.39e-08	2.99e-07	1.79e-07	B2M/CD1A/CD1B/CD1C/CD1D/CD1E/CD74	7	biological process
GO:0033627	cell adhesion mediated by integrin	10/247	72/18723	3.48e-08	3.06e-07	1.83e-07	CXCL13/CCL5/PIK3CG/CCL21/PTK2/SYK/PTPN6/CD3E/ICAM1/ITGB2	10	biological process
GO:0016032	viral process	22/247	415/18723	3.54e-08	3.1e-07	1.85e-07	CD4/CD74/CIITA/APOBEC3G/STAT1/APOBEC3F/CCL5/APOBEC3C/TRIM22/CCR5/CXCR4/CXCR6/CR2/CD28/CTSB/CTSL/ICAM1/CCL8/CCL4/CD86/IGF2R/TNFRSF4	22	biological process
GO:0032728	positive regulation of interferon-beta production	8/247	39/18723	3.54e-08	3.1e-07	1.85e-07	TLR3/IRF1/TLR7/IRF5/TLR4/TLR2/TLR8/TBK1	8	biological process
GO:0051770	positive regulation of nitric-oxide synthase biosynthetic process	6/247	16/18723	3.56e-08	3.1e-07	1.85e-07	IFNG/STAT1/JAK2/TLR4/NOD2/TLR2	6	biological process
GO:0032732	positive regulation of interleukin-1 production	10/247	73/18723	3.99e-08	3.47e-07	2.08e-07	IFNG/CCL19/JAK2/IL16/TLR4/NOD2/STAT3/TLR8/MALT1/TYROBP	10	biological process
GO:1901342	regulation of vasculature development	20/247	348/18723	4.07e-08	3.53e-07	2.11e-07	CXCL10/CXCL13/TLR3/STAT1/CD40/FASLG/CXCR4/PIK3CD/SEMA4A/CX3CR1/CAMP/CYBB/STAT3/GRN/JAK1/HMOX1/CCR3/IL10/C5AR1/C3AR1	20	biological process
GO:0007599	hemostasis	16/247	222/18723	4.43e-08	3.83e-07	2.29e-07	CD40/CD40LG/PIK3CG/JAK2/TXK/SYK/VAV1/PTPN6/PLCG2/LCK/PRKCQ/FCER1G/TLR4/F2R/PRDX2/MPL	16	biological process
GO:0050817	coagulation	16/247	222/18723	4.43e-08	3.83e-07	2.29e-07	CD40/CD40LG/PIK3CG/JAK2/TXK/SYK/VAV1/PTPN6/PLCG2/LCK/PRKCQ/FCER1G/TLR4/F2R/PRDX2/MPL	16	biological process
GO:0002433	immune response-regulating cell surface receptor signaling pathway involved in phagocytosis	7/247	27/18723	4.53e-08	3.88e-07	2.32e-07	PTK2/SYK/VAV1/FCGR2B/PTPRC/FGR/HCK	7	biological process
GO:0002825	regulation of T-helper 1 type immune response	7/247	27/18723	4.53e-08	3.88e-07	2.32e-07	XCL1/IL12B/CCL19/IL12RB1/IL18R1/IL27RA/TNFSF4	7	biological process
GO:0038096	Fc-gamma receptor signaling pathway involved in phagocytosis	7/247	27/18723	4.53e-08	3.88e-07	2.32e-07	PTK2/SYK/VAV1/FCGR2B/PTPRC/FGR/HCK	7	biological process
GO:0032608	interferon-beta production	9/247	56/18723	4.62e-08	3.94e-07	2.35e-07	TLR3/IRF1/TLR7/IRF5/RELB/TLR4/TLR2/TLR8/TBK1	9	biological process
GO:0032648	regulation of interferon-beta production	9/247	56/18723	4.62e-08	3.94e-07	2.35e-07	TLR3/IRF1/TLR7/IRF5/RELB/TLR4/TLR2/TLR8/TBK1	9	biological process
GO:0019058	viral life cycle	19/247	317/18723	4.64e-08	3.94e-07	2.36e-07	CD4/CD74/CIITA/APOBEC3G/APOBEC3F/CCL5/APOBEC3C/TRIM22/CCR5/CXCR4/CXCR6/CR2/CD28/CTSB/CTSL/ICAM1/CCL8/CD86/TNFRSF4	19	biological process
GO:0042060	wound healing	22/247	422/18723	4.75e-08	4.03e-07	2.41e-07	CD40/CD40LG/PIK3CG/CXCR4/JAK2/PTK2/TXK/SYK/VAV1/PTPN6/PLCG2/CX3CL1/LCK/PRKCQ/FCER1G/TGFB1/TLR4/F2R/PRDX2/HMOX1/MPL/RHOA	22	biological process
GO:0034767	positive regulation of ion transmembrane transport	14/247	167/18723	4.8e-08	4.06e-07	2.43e-07	IFNG/CXCL10/CXCL9/CXCL11/XCL1/TMSB4X/CD19/PLCG2/CX3CL1/ADRB2/CTSS/F2R/EDN3/PTAFR	14	biological process
GO:0006887	exocytosis	20/247	352/18723	4.91e-08	4.15e-07	2.48e-07	IFNG/PTGDS/CCL5/PIK3CG/SYK/BTK/RAC2/PIK3CD/FCGR2B/LAT/RASGRP1/CCL8/HMOX1/CCR1/FGR/PTGDR/HCK/PTAFR/ITGB2/CBL	20	biological process
GO:0016447	somatic recombination of immunoglobulin gene segments	9/247	57/18723	5.42e-08	4.57e-07	2.73e-07	CD40/CCR6/CD40LG/IL27RA/PTPRC/CD28/TGFB1/TNFSF4/IL10	9	biological process
GO:2000404	regulation of T cell migration	8/247	42/18723	6.56e-08	5.52e-07	3.3e-07	CXCL10/CXCL13/XCL1/CCL5/CCR6/CCL21/IL27RA/RHOA	8	biological process
GO:0071902	positive regulation of protein serine/threonine kinase activity	15/247	200/18723	6.99e-08	5.86e-07	3.5e-07	IFNG/CD40/PIK3CG/CCL19/SYK/ADRB2/CSF1R/FLT3/RASGRP1/TGFB1/TLR4/NOD2/PIK3R5/EDN3/RHOA	15	biological process
GO:0045055	regulated exocytosis	16/247	230/18723	7.25e-08	6.06e-07	3.63e-07	PTGDS/PIK3CG/SYK/BTK/RAC2/PIK3CD/FCGR2B/LAT/RASGRP1/HMOX1/FGR/PTGDR/HCK/PTAFR/ITGB2/CBL	16	biological process
GO:0033209	tumor necrosis factor-mediated signaling pathway	11/247	99/18723	7.65e-08	6.38e-07	3.81e-07	TMSB4X/STAT1/CYLD/JAK2/SYK/TNFSF13B/TNFRSF17/TNFRSF18/FAS/TNFRSF1B/TNFRSF4	11	biological process
GO:0002862	negative regulation of inflammatory response to antigenic stimulus	7/247	29/18723	7.78e-08	6.48e-07	3.87e-07	IL12B/SYK/FCGR2B/NOD2/IL10/FGR/HCK	7	biological process
GO:0002923	regulation of humoral immune response mediated by circulating immunoglobulin	6/247	18/18723	8.06e-08	6.68e-07	3.99e-07	LTA/CR2/PTPN6/FCGR2B/PTPRC/NOD2	6	biological process
GO:0048535	lymph node development	6/247	18/18723	8.06e-08	6.68e-07	3.99e-07	LTA/IL15/IL7R/CXCR5/LTB/TGFB1	6	biological process
GO:0035747	natural killer cell chemotaxis	5/247	10/18723	9.16e-08	7.55e-07	4.51e-07	XCL1/CCL5/PIK3CG/PIK3CD/CCL4	5	biological process
GO:0045348	positive regulation of MHC class II biosynthetic process	5/247	10/18723	9.16e-08	7.55e-07	4.51e-07	IFNG/CIITA/JAK2/TLR4/IL10	5	biological process
GO:2000401	regulation of lymphocyte migration	9/247	61/18723	9.98e-08	8.21e-07	4.91e-07	CXCL10/CXCL13/XCL1/CCL5/CCR6/CCL21/IL27RA/CCL4/RHOA	9	biological process
GO:0019886	antigen processing and presentation of exogenous peptide antigen via MHC class II	7/247	30/18723	1e-07	8.23e-07	4.92e-07	B2M/CD74/FCGR2B/CTSL/CTSS/FCER1G/LGMN	7	biological process
GO:0044409	entry into host	13/247	151/18723	1.07e-07	8.72e-07	5.21e-07	CD4/CD74/CIITA/TRIM22/CCR5/CXCR4/CR2/CTSB/CTSL/ICAM1/CD86/TNFRSF4/CBL	13	biological process
GO:1904064	positive regulation of cation transmembrane transport	13/247	151/18723	1.07e-07	8.72e-07	5.21e-07	IFNG/CXCL10/CXCL9/CXCL11/XCL1/TMSB4X/CD19/PLCG2/CX3CL1/ADRB2/CTSS/F2R/EDN3	13	biological process
GO:0031334	positive regulation of protein-containing complex assembly	16/247	237/18723	1.1e-07	8.93e-07	5.34e-07	IFNG/CXCL13/CCR7/CCL21/SYK/PLCG2/GMFG/ESR1/ICAM1/TGFB1/TLR4/CCL26/HCK/GRB2/NCK1/RHOA	16	biological process
GO:0071260	cellular response to mechanical stimulus	10/247	81/18723	1.1e-07	8.94e-07	5.34e-07	TLR3/IRF1/CD40/TLR7/PTGER4/FAS/TLR4/NFKB1/TLR8/TNFSF14	10	biological process
GO:0032731	positive regulation of interleukin-1 beta production	9/247	62/18723	1.15e-07	9.3e-07	5.56e-07	IFNG/CCL19/JAK2/TLR4/NOD2/STAT3/TLR8/MALT1/TYROBP	9	biological process
GO:0048002	antigen processing and presentation of peptide antigen	9/247	62/18723	1.15e-07	9.3e-07	5.56e-07	B2M/CD74/MR1/TAPBPL/FCGR2B/CTSL/CTSS/FCER1G/LGMN	9	biological process
GO:0046425	regulation of receptor signaling pathway via JAK-STAT	11/247	103/18723	1.16e-07	9.3e-07	5.56e-07	IFNG/SOCS1/CCL5/IL12B/JAK2/CRLF3/IL10RA/IL6R/PTPRC/F2R/IL10	11	biological process
GO:0002920	regulation of humoral immune response	8/247	45/18723	1.16e-07	9.3e-07	5.56e-07	LTA/CXCL13/CCR7/CR2/PTPN6/FCGR2B/PTPRC/NOD2	8	biological process
GO:0071354	cellular response to interleukin-6	8/247	45/18723	1.16e-07	9.3e-07	5.56e-07	JAK2/IL6R/ICAM1/HAMP/CAMP/NFKB1/STAT3/JAK1	8	biological process
GO:0002281	macrophage activation involved in immune response	6/247	19/18723	1.17e-07	9.32e-07	5.57e-07	IFNG/SYK/PLCG2/CX3CR1/GRN/TYROBP	6	biological process
GO:0032695	negative regulation of interleukin-12 production	6/247	19/18723	1.17e-07	9.32e-07	5.57e-07	CCR7/CMKLR1/NFKB1/NOD2/TLR8/IL10	6	biological process
GO:0048661	positive regulation of smooth muscle cell proliferation	11/247	104/18723	1.28e-07	1.02e-06	6.09e-07	STAT1/CCL5/JAK2/CX3CL1/IL6R/TGFB1/MMP9/TLR4/HMOX1/IL10/PTAFR	11	biological process
GO:0002828	regulation of type 2 immune response	7/247	31/18723	1.28e-07	1.02e-06	6.1e-07	CD74/XCL1/ARG2/IL27RA/NOD2/TNFSF4/CD86	7	biological process
GO:0045670	regulation of osteoclast differentiation	9/247	64/18723	1.53e-07	1.22e-06	7.27e-07	IFNG/TLR3/IL12B/INPP5D/CSF1/TLR4/CCR1/LILRB3/TYROBP	9	biological process
GO:0043270	positive regulation of ion transport	17/247	275/18723	1.56e-07	1.23e-06	7.36e-07	IFNG/CXCL10/CXCL9/CXCL11/XCL1/TMSB4X/CCL5/CD19/PLCG2/CX3CL1/ADRB2/CTSS/F2R/CCL4/CCR1/EDN3/PTAFR	17	biological process
GO:0006898	receptor-mediated endocytosis	16/247	244/18723	1.64e-07	1.29e-06	7.72e-07	B2M/CCL19/CCL21/SYK/FCGR2B/PLCG2/ADRB2/CTSL/FCER1G/MSR1/MARCO/CD14/IGF2R/ITGB2/GRB2/CBL	16	biological process
GO:2000377	regulation of reactive oxygen species metabolic process	13/247	157/18723	1.69e-07	1.33e-06	7.95e-07	ARG2/SYK/RAC2/PLCG2/TGFB1/TLR4/NOX4/STAT3/PRDX2/ITGB2/TYROBP/GRB2/RHOA	13	biological process
GO:0070588	calcium ion transmembrane transport	18/247	312/18723	1.87e-07	1.47e-06	8.8e-07	CXCL10/CXCL9/CXCL11/XCL1/PIK3CG/FASLG/CCL19/CCR7/CCL21/CCR5/CD19/PTPN6/PLCG2/CX3CL1/XCR1/LCK/PTPRC/F2R	18	biological process
GO:0009612	response to mechanical stimulus	15/247	216/18723	1.92e-07	1.5e-06	8.99e-07	CXCL10/TLR3/STAT1/IRF1/CD40/TLR7/CXCR4/PTK2/PTGER4/FAS/TLR4/NFKB1/TLR8/TNFSF14/RHOA	15	biological process
GO:0031098	stress-activated protein kinase signaling cascade	16/247	247/18723	1.93e-07	1.51e-06	9.04e-07	TLR3/TLR7/CYLD/CCL19/CCR7/CCL21/FCGR2B/PTGER4/FAS/RASGRP1/TLR4/NFKB1/NOD2/MAPK1/FGF19/RHOA	16	biological process
GO:0033628	regulation of cell adhesion mediated by integrin	8/247	48/18723	1.96e-07	1.53e-06	9.15e-07	CXCL13/CCL5/PIK3CG/CCL21/PTK2/SYK/PTPN6/CD3E	8	biological process
GO:0002562	somatic diversification of immune receptors via germline recombination within a single locus	9/247	66/18723	2.01e-07	1.56e-06	9.33e-07	CD40/CCR6/CD40LG/IL27RA/PTPRC/CD28/TGFB1/TNFSF4/IL10	9	biological process
GO:0016444	somatic cell DNA recombination	9/247	66/18723	2.01e-07	1.56e-06	9.33e-07	CD40/CCR6/CD40LG/IL27RA/PTPRC/CD28/TGFB1/TNFSF4/IL10	9	biological process
GO:0050766	positive regulation of phagocytosis	9/247	66/18723	2.01e-07	1.56e-06	9.33e-07	IFNG/IL15/FCGR2B/PLCG2/IL2RB/IL2RG/PTPRC/FCER1G/NOD2	9	biological process
GO:0033630	positive regulation of cell adhesion mediated by integrin	6/247	21/18723	2.28e-07	1.76e-06	1.05e-06	CXCL13/CCL5/CCL21/SYK/PTPN6/CD3E	6	biological process
GO:0051767	nitric-oxide synthase biosynthetic process	6/247	21/18723	2.28e-07	1.76e-06	1.05e-06	IFNG/STAT1/JAK2/TLR4/NOD2/TLR2	6	biological process
GO:0051769	regulation of nitric-oxide synthase biosynthetic process	6/247	21/18723	2.28e-07	1.76e-06	1.05e-06	IFNG/STAT1/JAK2/TLR4/NOD2/TLR2	6	biological process
GO:0034764	positive regulation of transmembrane transport	15/247	219/18723	2.29e-07	1.76e-06	1.05e-06	IFNG/CXCL10/CXCL9/CXCL11/XCL1/TMSB4X/CD19/PLCG2/CX3CL1/ADRB2/CTSS/F2R/EDN3/PTAFR/FGF19	15	biological process
GO:0097191	extrinsic apoptotic signaling pathway	15/247	219/18723	2.29e-07	1.76e-06	1.05e-06	IFNG/TLR3/CYLD/FASLG/JAK2/CX3CL1/IL6R/FAS/PTPRC/ICAM1/TGFB1/PRDX2/HMOX1/INHBA/TNFRSF1B	15	biological process
GO:0016445	somatic diversification of immunoglobulins	9/247	67/18723	2.3e-07	1.76e-06	1.05e-06	CD40/CCR6/CD40LG/IL27RA/PTPRC/CD28/TGFB1/TNFSF4/IL10	9	biological process
GO:0070741	response to interleukin-6	8/247	49/18723	2.32e-07	1.77e-06	1.06e-06	JAK2/IL6R/ICAM1/HAMP/CAMP/NFKB1/STAT3/JAK1	8	biological process
GO:0060759	regulation of response to cytokine stimulus	13/247	162/18723	2.43e-07	1.85e-06	1.11e-06	CD74/SOCS1/CCL5/CYLD/CXCR4/TXK/SYK/PTPN6/CSF1/PTPRC/TLR4/TLR2/TBK1	13	biological process
GO:0002495	antigen processing and presentation of peptide antigen via MHC class II	7/247	34/18723	2.54e-07	1.93e-06	1.15e-06	B2M/CD74/FCGR2B/CTSL/CTSS/FCER1G/LGMN	7	biological process
GO:0097305	response to alcohol	16/247	253/18723	2.68e-07	2.03e-06	1.21e-06	VCAM1/CCL19/CCR7/CCL21/CCR5/PTGER4/ICAM1/HAMP/TGFB1/CYBB/STAT3/CD14/TNFSF4/INHBA/RHOA/CBL	16	biological process
GO:0002526	acute inflammatory response	11/247	112/18723	2.74e-07	2.07e-06	1.24e-06	PIK3CG/VCAM1/CCR7/BTK/FCGR2B/IL6R/ICAM1/HAMP/STAT3/TNFSF4/OSMR	11	biological process
GO:0043406	positive regulation of MAP kinase activity	11/247	112/18723	2.74e-07	2.07e-06	1.24e-06	CD40/PIK3CG/CCL19/SYK/FLT3/RASGRP1/TGFB1/TLR4/NOD2/PIK3R5/EDN3	11	biological process
GO:0061517	macrophage proliferation	5/247	12/18723	2.82e-07	2.12e-06	1.27e-06	PTK2/CX3CL1/CSF1/CSF1R/MAPK1	5	biological process
GO:1902563	regulation of neutrophil activation	5/247	12/18723	2.82e-07	2.12e-06	1.27e-06	SYK/FCGR2B/GRN/PTAFR/ITGB2	5	biological process
GO:0032700	negative regulation of interleukin-17 production	6/247	22/18723	3.1e-07	2.32e-06	1.39e-06	IFNG/IL12B/ARG2/IL27RA/TLR4/TNFSF4	6	biological process
GO:0045624	positive regulation of T-helper cell differentiation	6/247	22/18723	3.1e-07	2.32e-06	1.39e-06	IL12B/CCL19/IL12RB1/TNFSF4/CD86/MALT1	6	biological process
GO:2000403	positive regulation of lymphocyte migration	7/247	35/18723	3.13e-07	2.34e-06	1.4e-06	CXCL10/CXCL13/XCL1/CCL5/CCL21/CCL4/RHOA	7	biological process
GO:0043370	regulation of CD4-positive, alpha-beta T cell differentiation	8/247	51/18723	3.2e-07	2.38e-06	1.42e-06	IFNG/SOCS1/IL12B/CCL19/IL12RB1/TNFSF4/CD86/MALT1	8	biological process
GO:0007254	JNK cascade	13/247	167/18723	3.46e-07	2.57e-06	1.54e-06	TLR3/TLR7/CYLD/CCL19/CCR7/CCL21/FCGR2B/PTGER4/RASGRP1/TLR4/NFKB1/NOD2/FGF19	13	biological process
GO:0002504	antigen processing and presentation of peptide or polysaccharide antigen via MHC class II	7/247	36/18723	3.85e-07	2.85e-06	1.7e-06	B2M/CD74/FCGR2B/CTSL/CTSS/FCER1G/LGMN	7	biological process
GO:0045191	regulation of isotype switching	7/247	36/18723	3.85e-07	2.85e-06	1.7e-06	CD40/IL27RA/PTPRC/CD28/TGFB1/TNFSF4/IL10	7	biological process
GO:0002363	alpha-beta T cell lineage commitment	6/247	23/18723	4.15e-07	3.07e-06	1.83e-06	IL12B/IL12RB1/IL6R/CTSL/STAT3/RHOA	6	biological process
GO:0002430	complement receptor mediated signaling pathway	5/247	13/18723	4.53e-07	3.34e-06	2e-06	CR2/CMKLR1/C5AR1/C5AR2/C3AR1	5	biological process
GO:0030316	osteoclast differentiation	10/247	94/18723	4.56e-07	3.35e-06	2e-06	IFNG/TLR3/IL12B/INPP5D/CSF1/CSF1R/TLR4/CCR1/LILRB3/TYROBP	10	biological process
GO:0045730	respiratory burst	7/247	37/18723	4.69e-07	3.44e-06	2.06e-06	PIK3CG/RAC2/PIK3CD/CYBB/GRN/PRDX2/HCK	7	biological process
GO:0046718	viral entry into host cell	12/247	144/18723	4.74e-07	3.47e-06	2.07e-06	CD4/CD74/CIITA/TRIM22/CCR5/CXCR4/CR2/CTSB/CTSL/ICAM1/CD86/TNFRSF4	12	biological process
GO:0001911	negative regulation of leukocyte mediated cytotoxicity	6/247	24/18723	5.47e-07	3.98e-06	2.38e-06	KIR2DL4/IL7R/FCGR2B/CX3CR1/PTPRC/KLRD1	6	biological process
GO:0002755	MyD88-dependent toll-like receptor signaling pathway	6/247	24/18723	5.47e-07	3.98e-06	2.38e-06	IRF1/BTK/TLR4/TLR2/TLR8/TLR1	6	biological process
GO:0038095	Fc-epsilon receptor signaling pathway	6/247	24/18723	5.47e-07	3.98e-06	2.38e-06	SYK/BTK/VAV1/PLCG2/PRKCQ/FCER1G	6	biological process
GO:0051897	positive regulation of protein kinase B signaling	11/247	120/18723	5.52e-07	4.01e-06	2.4e-06	PIK3CG/CCL19/CCR7/CCL21/PTK2/PIK3CD/CX3CL1/CX3CR1/CD28/TGFB1/PIK3R5	11	biological process
GO:0002478	antigen processing and presentation of exogenous peptide antigen	7/247	38/18723	5.69e-07	4.11e-06	2.46e-06	B2M/CD74/FCGR2B/CTSL/CTSS/FCER1G/LGMN	7	biological process
GO:0072538	T-helper 17 type immune response	7/247	38/18723	5.69e-07	4.11e-06	2.46e-06	IL12B/IL12RB1/IL27RA/IL6R/PRKCQ/STAT3/MALT1	7	biological process
GO:0052126	movement in host environment	13/247	175/18723	5.92e-07	4.27e-06	2.56e-06	CD4/CD74/CIITA/TRIM22/CCR5/CXCR4/CR2/CTSB/CTSL/ICAM1/CD86/TNFRSF4/CBL	13	biological process
GO:0051928	positive regulation of calcium ion transport	11/247	122/18723	6.52e-07	4.7e-06	2.81e-06	CXCL10/CXCL9/CXCL11/XCL1/CCL5/CD19/PLCG2/CX3CL1/F2R/CCL4/CCR1	11	biological process
GO:0051403	stress-activated MAPK cascade	15/247	239/18723	7.02e-07	5.03e-06	3.01e-06	TLR3/TLR7/CYLD/CCL19/CCR7/CCL21/FCGR2B/PTGER4/FAS/RASGRP1/TLR4/NFKB1/NOD2/MAPK1/FGF19	15	biological process
GO:0072593	reactive oxygen species metabolic process	15/247	239/18723	7.02e-07	5.03e-06	3.01e-06	ARG2/SYK/VAV1/RAC2/PLCG2/TGFB1/TLR4/NOX4/CYBB/STAT3/PRDX2/ITGB2/TYROBP/GRB2/RHOA	15	biological process
GO:1901623	regulation of lymphocyte chemotaxis	6/247	25/18723	7.12e-07	5.1e-06	3.05e-06	CXCL10/CXCL13/XCL1/CCL5/CCL21/CCL4	6	biological process
GO:0002200	somatic diversification of immune receptors	9/247	77/18723	7.73e-07	5.52e-06	3.3e-06	CD40/CCR6/CD40LG/IL27RA/PTPRC/CD28/TGFB1/TNFSF4/IL10	9	biological process
GO:0051281	positive regulation of release of sequestered calcium ion into cytosol	7/247	40/18723	8.22e-07	5.86e-06	3.5e-06	CXCL10/CXCL9/CXCL11/XCL1/CD19/CX3CL1/F2R	7	biological process
GO:0002763	positive regulation of myeloid leukocyte differentiation	8/247	58/18723	8.89e-07	6.32e-06	3.78e-06	CD4/CD74/IFNG/IL12B/CSF1/TGFB1/CCR1/TYROBP	8	biological process
GO:0002710	negative regulation of T cell mediated immunity	6/247	26/18723	9.15e-07	6.5e-06	3.88e-06	XCL1/IL7R/FCGR2B/PTPRC/KLRD1/NOD2	6	biological process
GO:0008360	regulation of cell shape	12/247	154/18723	9.74e-07	6.9e-06	4.13e-06	PTK2/RAC2/SEMA4A/SEMA4D/CSF1R/ICAM1/CCL13/FGR/HCK/PLXNC1/ITGB2/RHOA	12	biological process
GO:0050691	regulation of defense response to virus by host	7/247	41/18723	9.8e-07	6.92e-06	4.14e-06	MICB/APOBEC3G/STAT1/IL15/APOBEC3F/IL12B/IL12RB1	7	biological process
GO:0002679	respiratory burst involved in defense response	5/247	15/18723	1.03e-06	7.25e-06	4.34e-06	PIK3CG/PIK3CD/GRN/PRDX2/HCK	5	biological process
GO:0042976	activation of Janus kinase activity	5/247	15/18723	1.03e-06	7.25e-06	4.34e-06	SOCS1/CCL5/IL12B/JAK2/IL6R	5	biological process
GO:0045346	regulation of MHC class II biosynthetic process	5/247	15/18723	1.03e-06	7.25e-06	4.34e-06	IFNG/CIITA/JAK2/TLR4/IL10	5	biological process
GO:0090594	inflammatory response to wounding	5/247	15/18723	1.03e-06	7.25e-06	4.34e-06	TGFB1/TLR4/F2R/GRN/HMOX1	5	biological process
GO:0009620	response to fungus	8/247	60/18723	1.16e-06	8.11e-06	4.85e-06	GNLY/SYK/BTK/PLCG2/CX3CR1/HAMP/TLR4/MALT1	8	biological process
GO:0030890	positive regulation of B cell proliferation	7/247	42/18723	1.16e-06	8.12e-06	4.85e-06	CD74/CD40/NFATC2/TNFSF13B/PTPRC/TLR4/TNFRSF4	7	biological process
GO:0071496	cellular response to external stimulus	17/247	320/18723	1.3e-06	9.05e-06	5.41e-06	TLR3/IRF1/IL15/CD40/TLR7/VCAM1/PTGER4/FAS/PTPRC/ICAM1/TLR4/NFKB1/MAPK1/TLR8/HMOX1/TNFSF14/CBL	17	biological process
GO:0043030	regulation of macrophage activation	8/247	61/18723	1.32e-06	9.18e-06	5.49e-06	CD74/FCGR2B/CX3CL1/PTPRC/HAMP/TLR4/GRN/IL10	8	biological process
GO:0031342	negative regulation of cell killing	6/247	28/18723	1.47e-06	1.01e-05	6.07e-06	KIR2DL4/IL7R/FCGR2B/CX3CR1/PTPRC/KLRD1	6	biological process
GO:0045589	regulation of regulatory T cell differentiation	6/247	28/18723	1.47e-06	1.01e-05	6.07e-06	IFNG/SOCS1/IRF1/CD28/CTLA4/TNFSF4	6	biological process
GO:0002827	positive regulation of T-helper 1 type immune response	5/247	16/18723	1.49e-06	1.02e-05	6.11e-06	XCL1/IL12B/IL12RB1/IL18R1/IL27RA	5	biological process
GO:0002830	positive regulation of type 2 immune response	5/247	16/18723	1.49e-06	1.02e-05	6.11e-06	CD74/XCL1/NOD2/TNFSF4/CD86	5	biological process
GO:0010819	regulation of T cell chemotaxis	5/247	16/18723	1.49e-06	1.02e-05	6.11e-06	CXCL10/CXCL13/XCL1/CCL5/CCL21	5	biological process
GO:0045342	MHC class II biosynthetic process	5/247	16/18723	1.49e-06	1.02e-05	6.11e-06	IFNG/CIITA/JAK2/TLR4/IL10	5	biological process
GO:0002260	lymphocyte homeostasis	8/247	62/18723	1.5e-06	1.03e-05	6.14e-06	CD74/TNFSF13B/TNFRSF13B/TNFRSF17/LAT/FAS/TNFSF14/IL2RA	8	biological process
GO:0007229	integrin-mediated signaling pathway	10/247	107/18723	1.53e-06	1.04e-05	6.24e-06	CD40LG/PTK2/TXK/SYK/VAV1/ITGAL/LAT/FGR/HCK/ITGB2	10	biological process
GO:0150076	neuroinflammatory response	7/247	44/18723	1.61e-06	1.1e-05	6.59e-06	IFNG/PLCG2/CX3CL1/PTPRC/MMP9/GRN/TNFRSF1B	7	biological process
GO:0010632	regulation of epithelial cell migration	16/247	292/18723	1.8e-06	1.22e-05	7.32e-06	IFNG/CXCL13/TMSB4X/CD40/CCR6/PIK3CG/PTK2/PIK3CD/PLCG2/SEMA4A/LGMN/TGFB1/MMP9/GRN/HMOX1/RHOA	16	biological process
GO:0002360	T cell lineage commitment	6/247	29/18723	1.83e-06	1.24e-05	7.42e-06	IL12B/IL12RB1/IL6R/CTSL/STAT3/RHOA	6	biological process
GO:2000406	positive regulation of T cell migration	6/247	29/18723	1.83e-06	1.24e-05	7.42e-06	CXCL10/CXCL13/XCL1/CCL5/CCL21/RHOA	6	biological process
GO:0071214	cellular response to abiotic stimulus	17/247	331/18723	2.06e-06	1.39e-05	8.32e-06	TLR3/IRF1/CD40/TLR7/PTGER4/FAS/RELB/HAMP/MMP9/TLR4/NFKB1/NOX4/TLR8/TANK/PTAFR/TNFSF14/GRB2	17	biological process
GO:0104004	cellular response to environmental stimulus	17/247	331/18723	2.06e-06	1.39e-05	8.32e-06	TLR3/IRF1/CD40/TLR7/PTGER4/FAS/RELB/HAMP/MMP9/TLR4/NFKB1/NOX4/TLR8/TANK/PTAFR/TNFSF14/GRB2	17	biological process
GO:0043300	regulation of leukocyte degranulation	7/247	46/18723	2.21e-06	1.49e-05	8.9e-06	SYK/RAC2/FCGR2B/HMOX1/FGR/PTAFR/ITGB2	7	biological process
GO:0045577	regulation of B cell differentiation	6/247	30/18723	2.26e-06	1.52e-05	9.1e-06	SYK/BTK/INPP5D/PTPN6/IL10/INHBA	6	biological process
GO:0046330	positive regulation of JNK cascade	9/247	89/18723	2.66e-06	1.78e-05	1.07e-05	TLR3/CCL19/CCR7/CCL21/FCGR2B/RASGRP1/TLR4/NOD2/FGF19	9	biological process
GO:0045066	regulatory T cell differentiation	6/247	31/18723	2.77e-06	1.86e-05	1.11e-05	IFNG/SOCS1/IRF1/CD28/CTLA4/TNFSF4	6	biological process
GO:0002283	neutrophil activation involved in immune response	5/247	18/18723	2.86e-06	1.91e-05	1.14e-05	SYK/FCER1G/PTAFR/ITGB2/TYROBP	5	biological process
GO:0002544	chronic inflammatory response	5/247	18/18723	2.86e-06	1.91e-05	1.14e-05	LTA/CXCL13/CCL5/VCAM1/IL10	5	biological process
GO:0051701	biological process involved in interaction with host	13/247	203/18723	3.14e-06	2.09e-05	1.25e-05	CD4/CD74/CIITA/TRIM22/CCR5/CXCR4/CR2/CTSB/CTSL/ICAM1/CD86/TNFRSF4/CBL	13	biological process
GO:0050850	positive regulation of calcium-mediated signaling	6/247	32/18723	3.37e-06	2.24e-05	1.34e-05	CD4/SYK/PLCG2/ZAP70/CD3E/CCL4	6	biological process
GO:0060193	positive regulation of lipase activity	8/247	69/18723	3.42e-06	2.27e-05	1.36e-05	CCL5/TXK/ESR1/ITK/CD86/C5AR1/PTAFR/RHOA	8	biological process
GO:0043524	negative regulation of neuron apoptotic process	11/247	145/18723	3.6e-06	2.39e-05	1.43e-05	JAK2/CX3CL1/CX3CR1/LGMN/F2R/GRN/HMOX1/IL10/C5AR1/CNTFR/RHOA	11	biological process
GO:0140131	positive regulation of lymphocyte chemotaxis	5/247	19/18723	3.84e-06	2.54e-05	1.52e-05	CXCL13/XCL1/CCL5/CCL21/CCL4	5	biological process
GO:0010634	positive regulation of epithelial cell migration	12/247	176/18723	3.96e-06	2.62e-05	1.57e-05	IFNG/TMSB4X/CD40/CCR6/PIK3CG/PIK3CD/PLCG2/LGMN/TGFB1/MMP9/GRN/HMOX1	12	biological process
GO:0002335	mature B cell differentiation	6/247	33/18723	4.08e-06	2.69e-05	1.61e-05	CD19/FCGR2B/PLCG2/CMTM7/IL10/MALT1	6	biological process
GO:0043405	regulation of MAP kinase activity	12/247	177/18723	4.2e-06	2.77e-05	1.65e-05	CD40/PIK3CG/CCL19/SYK/PTPN6/FLT3/RASGRP1/TGFB1/TLR4/NOD2/PIK3R5/EDN3	12	biological process
GO:0043254	regulation of protein-containing complex assembly	19/247	428/18723	4.39e-06	2.88e-05	1.72e-05	IFNG/CXCL13/TMSB4X/CCR7/CCL21/SYK/PLCG2/GMFG/ESR1/PTGER4/ICAM1/TGFB1/TLR4/CCL26/HCK/THRA/GRB2/NCK1/RHOA	19	biological process
GO:0045834	positive regulation of lipid metabolic process	11/247	149/18723	4.69e-06	3.08e-05	1.84e-05	CD74/IFNG/CCL19/CCR7/CCL21/PTK2/CD19/FLT3/TGFB1/NOD2/FGR	11	biological process
GO:0043491	protein kinase B signaling	13/247	211/18723	4.8e-06	3.14e-05	1.88e-05	CD40/CCL5/PIK3CG/CCL19/CCR7/CCL21/PTK2/PIK3CD/CX3CL1/CX3CR1/CD28/TGFB1/PIK3R5	13	biological process
GO:0070232	regulation of T cell apoptotic process	6/247	34/18723	4.9e-06	3.2e-05	1.91e-05	IDO1/CCL5/IL7R/PDCD1/ARG2/PRKCQ	6	biological process
GO:0001959	regulation of cytokine-mediated signaling pathway	11/247	150/18723	5.01e-06	3.26e-05	1.95e-05	CD74/SOCS1/CCL5/CYLD/CXCR4/TXK/SYK/PTPN6/CSF1/PTPRC/TBK1	11	biological process
GO:0043523	regulation of neuron apoptotic process	13/247	212/18723	5.05e-06	3.27e-05	1.96e-05	FASLG/JAK2/CX3CL1/CX3CR1/LGMN/F2R/GRN/HMOX1/IL10/C5AR1/CNTFR/TYROBP/RHOA	13	biological process
GO:0045063	T-helper 1 cell differentiation	5/247	20/18723	5.06e-06	3.27e-05	1.96e-05	CCL19/SEMA4A/IL18R1/RELB/TNFSF4	5	biological process
GO:0046629	gamma-delta T cell activation	5/247	20/18723	5.06e-06	3.27e-05	1.96e-05	MICB/SYK/PTPRC/ITK/NOD2	5	biological process
GO:0098543	detection of other organism	5/247	20/18723	5.06e-06	3.27e-05	1.96e-05	CD1D/TLR4/NOD2/TLR2/TLR1	5	biological process
GO:0002218	activation of innate immune response	7/247	52/18723	5.15e-06	3.33e-05	1.99e-05	SYK/PLCG2/KLRD1/TLR4/TBK1/HCK/TYROBP	7	biological process
GO:0051402	neuron apoptotic process	14/247	246/18723	5.2e-06	3.35e-05	2e-05	FASLG/JAK2/CX3CL1/CX3CR1/FAS/LGMN/F2R/GRN/HMOX1/IL10/C5AR1/CNTFR/TYROBP/RHOA	14	biological process
GO:0050848	regulation of calcium-mediated signaling	8/247	73/18723	5.26e-06	3.37e-05	2.02e-05	CD4/SYK/CD22/PLCG2/CMKLR1/ZAP70/CD3E/CCL4	8	biological process
GO:1904427	positive regulation of calcium ion transmembrane transport	8/247	73/18723	5.26e-06	3.37e-05	2.02e-05	CXCL10/CXCL9/CXCL11/XCL1/CD19/PLCG2/CX3CL1/F2R	8	biological process
GO:1904062	regulation of cation transmembrane transport	17/247	357/18723	5.66e-06	3.63e-05	2.17e-05	IFNG/CXCL10/CXCL9/CXCL11/XCL1/TMSB4X/PIK3CG/CD19/PTPN6/PLCG2/CX3CL1/ADRB2/CTSS/HAMP/MMP9/F2R/EDN3	17	biological process
GO:0001915	negative regulation of T cell mediated cytotoxicity	4/247	10/18723	5.83e-06	3.73e-05	2.23e-05	IL7R/FCGR2B/PTPRC/KLRD1	4	biological process
GO:1901653	cellular response to peptide	17/247	359/18723	6.1e-06	3.89e-05	2.33e-05	STAT1/SOCS1/VCAM1/JAK2/PTK2/FCGR2B/ADRB2/TSHR/PRKCQ/ICAM1/LGMN/TLR4/NFKB1/NOD2/STAT3/GRB2/NCK1	17	biological process
GO:0030838	positive regulation of actin filament polymerization	9/247	99/18723	6.45e-06	4.11e-05	2.46e-05	CCR7/CCL21/GMFG/ICAM1/CCL26/HCK/GRB2/NCK1/RHOA	9	biological process
GO:0043373	CD4-positive, alpha-beta T cell lineage commitment	5/247	21/18723	6.57e-06	4.17e-05	2.49e-05	IL12B/IL12RB1/IL6R/CTSL/STAT3	5	biological process
GO:0090026	positive regulation of monocyte chemotaxis	5/247	21/18723	6.57e-06	4.17e-05	2.49e-05	CXCL10/CCL5/CX3CR1/LGMN/CCR1	5	biological process
GO:0010524	positive regulation of calcium ion transport into cytosol	7/247	54/18723	6.67e-06	4.23e-05	2.53e-05	CXCL10/CXCL9/CXCL11/XCL1/CD19/CX3CL1/F2R	7	biological process
GO:0032720	negative regulation of tumor necrosis factor production	8/247	76/18723	7.13e-06	4.5e-05	2.69e-05	ARG2/PTPN6/CX3CL1/IL27RA/TLR4/NOD2/IL10/C5AR2	8	biological process
GO:2000379	positive regulation of reactive oxygen species metabolic process	8/247	76/18723	7.13e-06	4.5e-05	2.69e-05	SYK/PLCG2/TGFB1/TLR4/NOX4/ITGB2/TYROBP/GRB2	8	biological process
GO:0045620	negative regulation of lymphocyte differentiation	7/247	55/18723	7.56e-06	4.76e-05	2.85e-05	CD74/SOCS1/IRF1/CTLA4/PRDX2/TNFSF4/INHBA	7	biological process
GO:0002262	myeloid cell homeostasis	11/247	157/18723	7.76e-06	4.87e-05	2.91e-05	B2M/STAT1/JAK2/PIK3CD/INPP5D/HAMP/STAT3/HMOX1/INHBA/MPL/THRA	11	biological process
GO:1990845	adaptive thermogenesis	11/247	157/18723	7.76e-06	4.87e-05	2.91e-05	IL15/CXCR4/JAK2/SYK/CMKLR1/ADRB2/IL18R1/TSHR/TLR4/BMP8A/THRA	11	biological process
GO:0002369	T cell cytokine production	6/247	37/18723	8.19e-06	5.12e-05	3.06e-05	B2M/XCL1/IL18R1/TNFSF4/MALT1/TNFRSF1B	6	biological process
GO:0002724	regulation of T cell cytokine production	6/247	37/18723	8.19e-06	5.12e-05	3.06e-05	B2M/XCL1/IL18R1/TNFSF4/MALT1/TNFRSF1B	6	biological process
GO:0010518	positive regulation of phospholipase activity	7/247	56/18723	8.54e-06	5.32e-05	3.18e-05	CCL5/TXK/ESR1/ITK/CD86/C5AR1/PTAFR	7	biological process
GO:1904645	response to amyloid-beta	7/247	56/18723	8.54e-06	5.32e-05	3.18e-05	VCAM1/FCGR2B/ADRB2/ICAM1/LGMN/MMP9/TLR4	7	biological process
GO:1903556	negative regulation of tumor necrosis factor superfamily cytokine production	8/247	78/18723	8.66e-06	5.39e-05	3.22e-05	ARG2/PTPN6/CX3CL1/IL27RA/TLR4/NOD2/IL10/C5AR2	8	biological process
GO:0019216	regulation of lipid metabolic process	16/247	331/18723	8.89e-06	5.52e-05	3.3e-05	CD74/IFNG/PIK3CG/CCL19/CCR7/CCL21/PTK2/CD19/PLCG2/FLT3/TGFB1/NFKB1/NOD2/FGR/FGF19/THRA	16	biological process
GO:0051279	regulation of release of sequestered calcium ion into cytosol	8/247	79/18723	9.53e-06	5.9e-05	3.53e-05	CXCL10/CXCL9/CXCL11/XCL1/CD19/PTPN6/CX3CL1/F2R	8	biological process
GO:0061844	antimicrobial humoral immune response mediated by antimicrobial peptide	8/247	79/18723	9.53e-06	5.9e-05	3.53e-05	CXCL10/CXCL9/CXCL11/CXCL13/GNLY/CAMP/CCL13/NOD2	8	biological process
GO:0010742	macrophage derived foam cell differentiation	6/247	38/18723	9.61e-06	5.91e-05	3.54e-05	STAT1/CSF1/TGFB1/NFKB1/CETP/MSR1	6	biological process
GO:0090077	foam cell differentiation	6/247	38/18723	9.61e-06	5.91e-05	3.54e-05	STAT1/CSF1/TGFB1/NFKB1/CETP/MSR1	6	biological process
GO:0060760	positive regulation of response to cytokine stimulus	7/247	57/18723	9.63e-06	5.91e-05	3.54e-05	CD74/CXCR4/TXK/CSF1/TLR4/TLR2/TBK1	7	biological process
GO:0061756	leukocyte adhesion to vascular endothelial cell	7/247	57/18723	9.63e-06	5.91e-05	3.54e-05	VCAM1/CCL21/CX3CR1/ICAM1/PTAFR/ITGB2/RHOA	7	biological process
GO:0032872	regulation of stress-activated MAPK cascade	12/247	192/18723	9.66e-06	5.93e-05	3.54e-05	TLR3/CYLD/CCL19/CCR7/CCL21/FCGR2B/FAS/RASGRP1/TLR4/NOD2/MAPK1/FGF19	12	biological process
GO:0002758	innate immune response-activating signal transduction	5/247	23/18723	1.06e-05	6.47e-05	3.87e-05	SYK/PLCG2/KLRD1/HCK/TYROBP	5	biological process
GO:0032740	positive regulation of interleukin-17 production	5/247	23/18723	1.06e-05	6.47e-05	3.87e-05	IL15/IL12B/PRKCQ/TGFB1/NOD2	5	biological process
GO:0034695	response to prostaglandin E	5/247	23/18723	1.06e-05	6.47e-05	3.87e-05	CCL19/CCR7/CCL21/PTGER4/TNFSF4	5	biological process
GO:0043369	CD4-positive or CD8-positive, alpha-beta T cell lineage commitment	5/247	23/18723	1.06e-05	6.47e-05	3.87e-05	IL12B/IL12RB1/IL6R/CTSL/STAT3	5	biological process
GO:0046328	regulation of JNK cascade	10/247	133/18723	1.09e-05	6.6e-05	3.95e-05	TLR3/CYLD/CCL19/CCR7/CCL21/FCGR2B/RASGRP1/TLR4/NOD2/FGF19	10	biological process
GO:0002701	negative regulation of production of molecular mediator of immune response	6/247	39/18723	1.12e-05	6.81e-05	4.07e-05	XCL1/CD22/FCGR2B/TGFB1/HMOX1/IL10	6	biological process
GO:0045622	regulation of T-helper cell differentiation	6/247	39/18723	1.12e-05	6.81e-05	4.07e-05	IL12B/CCL19/IL12RB1/TNFSF4/CD86/MALT1	6	biological process
GO:0035821	modulation of process of other organism	9/247	106/18723	1.13e-05	6.82e-05	4.08e-05	CD4/IFNG/CCL5/SYK/CX3CR1/PRF1/CCL8/CCL4/IGF2R	9	biological process
GO:0070302	regulation of stress-activated protein kinase signaling cascade	12/247	195/18723	1.13e-05	6.82e-05	4.08e-05	TLR3/CYLD/CCL19/CCR7/CCL21/FCGR2B/FAS/RASGRP1/TLR4/NOD2/MAPK1/FGF19	12	biological process
GO:0046209	nitric oxide metabolic process	8/247	81/18723	1.15e-05	6.92e-05	4.14e-05	IFNG/ARG2/JAK2/CX3CR1/ICAM1/TLR4/TLR2/IL10	8	biological process
GO:0050792	regulation of viral process	11/247	164/18723	1.17e-05	7.06e-05	4.22e-05	CD4/CD74/CIITA/APOBEC3G/STAT1/APOBEC3F/CCL5/APOBEC3C/TRIM22/CXCR4/CD28	11	biological process
GO:0042063	gliogenesis	15/247	301/18723	1.19e-05	7.14e-05	4.27e-05	IFNG/LTA/CXCR4/CX3CL1/CX3CR1/CSF1/TGFB1/TLR4/TLR2/MAPK1/STAT3/GRN/C5AR1/TNFRSF1B/RHOA	15	biological process
GO:0010952	positive regulation of peptidase activity	12/247	197/18723	1.25e-05	7.51e-05	4.49e-05	FASLG/JAK2/SYK/LCK/FAS/LGMN/STAT3/F2R/GRN/TANK/MALT1/RHOA	12	biological process
GO:2001057	reactive nitrogen species metabolic process	8/247	82/18723	1.26e-05	7.53e-05	4.5e-05	IFNG/ARG2/JAK2/CX3CR1/ICAM1/TLR4/TLR2/IL10	8	biological process
GO:0010543	regulation of platelet activation	6/247	40/18723	1.31e-05	7.78e-05	4.65e-05	JAK2/TXK/SYK/PRKCQ/FCER1G/TLR4	6	biological process
GO:0010863	positive regulation of phospholipase C activity	6/247	40/18723	1.31e-05	7.78e-05	4.65e-05	TXK/ESR1/ITK/CD86/C5AR1/PTAFR	6	biological process
GO:0150077	regulation of neuroinflammatory response	6/247	40/18723	1.31e-05	7.78e-05	4.65e-05	PLCG2/CX3CL1/PTPRC/MMP9/GRN/TNFRSF1B	6	biological process
GO:0002726	positive regulation of T cell cytokine production	5/247	24/18723	1.33e-05	7.88e-05	4.71e-05	B2M/XCL1/IL18R1/TNFSF4/MALT1	5	biological process
GO:0002922	positive regulation of humoral immune response	5/247	24/18723	1.33e-05	7.88e-05	4.71e-05	LTA/CCR7/FCGR2B/PTPRC/NOD2	5	biological process
GO:0002863	positive regulation of inflammatory response to antigenic stimulus	4/247	12/18723	1.35e-05	7.96e-05	4.76e-05	LTA/CCR7/BTK/CD28	4	biological process
GO:0032490	detection of molecule of bacterial origin	4/247	12/18723	1.35e-05	7.96e-05	4.76e-05	TLR4/NOD2/TLR2/TLR1	4	biological process
GO:0098581	detection of external biotic stimulus	5/247	25/18723	1.64e-05	9.68e-05	5.79e-05	CD1D/TLR4/NOD2/TLR2/TLR1	5	biological process
GO:2000316	regulation of T-helper 17 type immune response	5/247	25/18723	1.64e-05	9.68e-05	5.79e-05	IL12B/IL12RB1/IL27RA/PRKCQ/MALT1	5	biological process
GO:0032689	negative regulation of interferon-gamma production	6/247	42/18723	1.75e-05	0.000102617	6.14e-05	XCL1/TLR4/NOD2/TNFSF4/IL10/INHBA	6	biological process
GO:1900274	regulation of phospholipase C activity	6/247	42/18723	1.75e-05	0.000102617	6.14e-05	TXK/ESR1/ITK/CD86/C5AR1/PTAFR	6	biological process
GO:0032494	response to peptidoglycan	4/247	13/18723	1.92e-05	0.000112026	6.7e-05	IRF5/CAMP/NOD2/C5AR1	4	biological process
GO:0036005	response to macrophage colony-stimulating factor	4/247	13/18723	1.92e-05	0.000112026	6.7e-05	CSF1/CSF1R/TLR4/TLR2	4	biological process
GO:0036006	cellular response to macrophage colony-stimulating factor stimulus	4/247	13/18723	1.92e-05	0.000112026	6.7e-05	CSF1/CSF1R/TLR4/TLR2	4	biological process
GO:0048302	regulation of isotype switching to IgG isotypes	4/247	13/18723	1.92e-05	0.000112026	6.7e-05	CD40/IL27RA/PTPRC/CD28	4	biological process
GO:2000318	positive regulation of T-helper 17 type immune response	4/247	13/18723	1.92e-05	0.000112026	6.7e-05	IL12B/IL12RB1/PRKCQ/MALT1	4	biological process
GO:0045672	positive regulation of osteoclast differentiation	5/247	26/18723	2.01e-05	0.000116727	6.98e-05	IFNG/IL12B/CSF1/CCR1/TYROBP	5	biological process
GO:2000108	positive regulation of leukocyte apoptotic process	5/247	26/18723	2.01e-05	0.000116727	6.98e-05	IDO1/CCL5/PDCD1/PIK3CD/IL10	5	biological process
GO:0001659	temperature homeostasis	11/247	174/18723	2.05e-05	0.000118306	7.07e-05	IL15/CXCR4/JAK2/SYK/CMKLR1/ADRB2/IL18R1/TSHR/TLR4/STAT3/THRA	11	biological process
GO:0007584	response to nutrient	11/247	174/18723	2.05e-05	0.000118306	7.07e-05	LTA/CXCL10/STAT1/IL15/CD40/VCAM1/CD3E/HAMP/NOD2/CYBB/HMOX1	11	biological process
GO:0106106	cold-induced thermogenesis	10/247	144/18723	2.18e-05	0.000125402	7.5e-05	IL15/CXCR4/JAK2/SYK/CMKLR1/ADRB2/IL18R1/TSHR/TLR4/THRA	10	biological process
GO:0120161	regulation of cold-induced thermogenesis	10/247	144/18723	2.18e-05	0.000125402	7.5e-05	IL15/CXCR4/JAK2/SYK/CMKLR1/ADRB2/IL18R1/TSHR/TLR4/THRA	10	biological process
GO:0010631	epithelial cell migration	16/247	357/18723	2.26e-05	0.000130066	7.78e-05	IFNG/CXCL13/TMSB4X/CD40/CCR6/PIK3CG/PTK2/PIK3CD/PLCG2/SEMA4A/LGMN/TGFB1/MMP9/GRN/HMOX1/RHOA	16	biological process
GO:0042554	superoxide anion generation	6/247	44/18723	2.3e-05	0.000132136	7.9e-05	SYK/TGFB1/NOX4/CYBB/ITGB2/TYROBP	6	biological process
GO:0071900	regulation of protein serine/threonine kinase activity	16/247	359/18723	2.42e-05	0.000138746	8.3e-05	IFNG/CD40/PIK3CG/CCL19/SYK/PTPN6/ADRB2/CSF1R/FLT3/RASGRP1/TGFB1/TLR4/NOD2/PIK3R5/EDN3/RHOA	16	biological process
GO:0045830	positive regulation of isotype switching	5/247	27/18723	2.44e-05	0.000139828	8.36e-05	CD40/PTPRC/CD28/TGFB1/TNFSF4	5	biological process
GO:0034109	homotypic cell-cell adhesion	8/247	90/18723	2.5e-05	0.000142796	8.54e-05	CCL5/PIK3CG/JAK2/SYK/PTPN6/PRKCQ/JAK1/MPL	8	biological process
GO:0090132	epithelium migration	16/247	360/18723	2.5e-05	0.000142796	8.54e-05	IFNG/CXCL13/TMSB4X/CD40/CCR6/PIK3CG/PTK2/PIK3CD/PLCG2/SEMA4A/LGMN/TGFB1/MMP9/GRN/HMOX1/RHOA	16	biological process
GO:0032715	negative regulation of interleukin-6 production	7/247	66/18723	2.56e-05	0.000146018	8.73e-05	INPP5D/PTPN6/CX3CL1/IL27RA/TLR4/IL10/C5AR2	7	biological process
GO:1904646	cellular response to amyloid-beta	6/247	45/18723	2.63e-05	0.000149294	8.93e-05	VCAM1/FCGR2B/ADRB2/ICAM1/LGMN/TLR4	6	biological process
GO:0001771	immunological synapse formation	4/247	14/18723	2.67e-05	0.00015061	9e-05	CCL19/CCR7/CCL21/PRF1	4	biological process
GO:0045579	positive regulation of B cell differentiation	4/247	14/18723	2.67e-05	0.00015061	9e-05	SYK/BTK/INPP5D/IL10	4	biological process
GO:0048291	isotype switching to IgG isotypes	4/247	14/18723	2.67e-05	0.00015061	9e-05	CD40/IL27RA/PTPRC/CD28	4	biological process
GO:0072540	T-helper 17 cell lineage commitment	4/247	14/18723	2.67e-05	0.00015061	9e-05	IL12B/IL12RB1/IL6R/STAT3	4	biological process
GO:0060191	regulation of lipase activity	8/247	91/18723	2.71e-05	0.000152831	9.14e-05	CCL5/TXK/ESR1/ITK/CD86/C5AR1/PTAFR/RHOA	8	biological process
GO:0010517	regulation of phospholipase activity	7/247	67/18723	2.83e-05	0.000159125	9.51e-05	CCL5/TXK/ESR1/ITK/CD86/C5AR1/PTAFR	7	biological process
GO:0042130	negative regulation of T cell proliferation	7/247	67/18723	2.83e-05	0.000159125	9.51e-05	XCL1/ARG2/PTPN6/CTLA4/IL10/CD86/IL2RA	7	biological process
GO:0061082	myeloid leukocyte cytokine production	5/247	28/18723	2.94e-05	0.000165096	9.87e-05	CD74/PLCG2/TGFB1/TLR4/HMOX1	5	biological process
GO:0090130	tissue migration	16/247	365/18723	2.96e-05	0.000165715	9.91e-05	IFNG/CXCL13/TMSB4X/CD40/CCR6/PIK3CG/PTK2/PIK3CD/PLCG2/SEMA4A/LGMN/TGFB1/MMP9/GRN/HMOX1/RHOA	16	biological process
GO:0034765	regulation of ion transmembrane transport	19/247	491/18723	3e-05	0.00016798	0.000100429	IFNG/CXCL10/CXCL9/CXCL11/XCL1/TMSB4X/PIK3CG/CD19/PTPN6/PLCG2/CX3CL1/ADRB2/CTSS/HAMP/MMP9/CYBB/F2R/EDN3/PTAFR	19	biological process
GO:0031640	killing of cells of other organism	7/247	68/18723	3.12e-05	0.000174269	0.000104189	IFNG/GNLY/SYK/PRF1/HAMP/CAMP/CCL13	7	biological process
GO:0045581	negative regulation of T cell differentiation	6/247	47/18723	3.39e-05	0.00018877	0.000112859	CD74/SOCS1/IRF1/CTLA4/PRDX2/TNFSF4	6	biological process
GO:0050688	regulation of defense response to virus	7/247	69/18723	3.44e-05	0.000191165	0.00011429	MICB/APOBEC3G/STAT1/IL15/APOBEC3F/IL12B/IL12RB1	7	biological process
GO:0072539	T-helper 17 cell differentiation	5/247	29/18723	3.52e-05	0.000195119	0.000116655	IL12B/IL12RB1/IL6R/STAT3/MALT1	5	biological process
GO:0090025	regulation of monocyte chemotaxis	5/247	29/18723	3.52e-05	0.000195119	0.000116655	CXCL10/CCL5/CX3CR1/LGMN/CCR1	5	biological process
GO:0002730	regulation of dendritic cell cytokine production	4/247	15/18723	3.6e-05	0.000198835	0.000118876	TLR3/PLCG2/TLR4/NOD2	4	biological process
GO:0010820	positive regulation of T cell chemotaxis	4/247	15/18723	3.6e-05	0.000198835	0.000118876	CXCL13/XCL1/CCL5/CCL21	4	biological process
GO:0043433	negative regulation of DNA-binding transcription factor activity	11/247	185/18723	3.61e-05	0.000198835	0.000118876	XCL1/TMSB4X/CYLD/CMKLR1/ESR1/NOD2/PRDX2/HMOX1/TNFSF4/IL10/TNFRSF4	11	biological process
GO:0051896	regulation of protein kinase B signaling	11/247	185/18723	3.61e-05	0.000198835	0.000118876	PIK3CG/CCL19/CCR7/CCL21/PTK2/PIK3CD/CX3CL1/CX3CR1/CD28/TGFB1/PIK3R5	11	biological process
GO:0002532	production of molecular mediator involved in inflammatory response	8/247	95/18723	3.71e-05	0.000203884	0.000121895	SYK/BTK/TLR4/NOD2/STAT3/GRN/PRDX2/IL17RA	8	biological process
GO:0034694	response to prostaglandin	5/247	30/18723	4.18e-05	0.000229043	0.000136936	CCL19/CCR7/CCL21/PTGER4/TNFSF4	5	biological process
GO:0070229	negative regulation of lymphocyte apoptotic process	5/247	30/18723	4.18e-05	0.000229043	0.000136936	CD74/CCL5/IL7R/ARG2/PRKCQ	5	biological process
GO:1901216	positive regulation of neuron death	8/247	97/18723	4.31e-05	0.000235856	0.00014101	IFNG/FASLG/FCGR2B/TLR4/GRN/ITGB2/TYROBP/RHOA	8	biological process
GO:0032874	positive regulation of stress-activated MAPK cascade	9/247	126/18723	4.51e-05	0.00024647	0.000147355	TLR3/CCL19/CCR7/CCL21/FCGR2B/RASGRP1/TLR4/NOD2/FGF19	9	biological process
GO:0050878	regulation of body fluid levels	16/247	379/18723	4.65e-05	0.000253575	0.000151603	CD40/CD40LG/PIK3CG/JAK2/TXK/SYK/VAV1/PTPN6/PLCG2/LCK/PRKCQ/FCER1G/TLR4/F2R/PRDX2/MPL	16	biological process
GO:0007568	aging	15/247	339/18723	4.73e-05	0.000257567	0.00015399	B2M/KIR2DL4/IL15/ARG2/VCAM1/INPP5D/CX3CL1/ICAM1/HAMP/NOX4/MAPK1/STAT3/IL10/TNFRSF1B/GRB2	15	biological process
GO:0002371	dendritic cell cytokine production	4/247	16/18723	4.75e-05	0.000258001	0.000154249	TLR3/PLCG2/TLR4/NOD2	4	biological process
GO:0070230	positive regulation of lymphocyte apoptotic process	4/247	16/18723	4.75e-05	0.000258001	0.000154249	IDO1/CCL5/PDCD1/IL10	4	biological process
GO:0030041	actin filament polymerization	11/247	191/18723	4.83e-05	0.000261943	0.000156606	TMSB4X/CCR7/CCL21/JAK2/GMFG/ICAM1/CCL26/HCK/GRB2/NCK1/RHOA	11	biological process
GO:0060337	type I interferon signaling pathway	6/247	50/18723	4.85e-05	0.000262605	0.000157002	STAT1/PTPN6/IFNAR1/JAK1/IFNAR2/TBK1	6	biological process
GO:0002230	positive regulation of defense response to virus by host	5/247	31/18723	4.93e-05	0.000266332	0.00015923	APOBEC3G/STAT1/APOBEC3F/IL12B/IL12RB1	5	biological process
GO:0046777	protein autophosphorylation	12/247	227/18723	5.08e-05	0.000274086	0.000163866	JAK2/PTK2/TXK/SYK/BTK/CSF1R/FLT3/ZAP70/PTPRC/ITK/FGR/HCK	12	biological process
GO:1903169	regulation of calcium ion transmembrane transport	10/247	159/18723	5.09e-05	0.000274348	0.000164022	CXCL10/CXCL9/CXCL11/XCL1/PIK3CG/CD19/PTPN6/PLCG2/CX3CL1/F2R	10	biological process
GO:0070304	positive regulation of stress-activated protein kinase signaling cascade	9/247	128/18723	5.1e-05	0.000274521	0.000164126	TLR3/CCL19/CCR7/CCL21/FCGR2B/RASGRP1/TLR4/NOD2/FGF19	9	biological process
GO:0045807	positive regulation of endocytosis	8/247	100/18723	5.36e-05	0.000288047	0.000172213	B2M/CCL19/CCL21/SYK/PLCG2/CD14/PPP3CC/CBL	8	biological process
GO:0006801	superoxide metabolic process	7/247	74/18723	5.42e-05	0.000290674	0.000173783	SYK/TGFB1/NOX4/CYBB/PRDX2/ITGB2/TYROBP	7	biological process
GO:1901654	response to ketone	11/247	194/18723	5.56e-05	0.000297977	0.000178149	CCL19/CCR7/CCL21/PTGER4/ICAM1/TGFB1/TLR2/CYBB/TNFSF4/PTAFR/CBL	11	biological process
GO:0048662	negative regulation of smooth muscle cell proliferation	7/247	75/18723	5.91e-05	0.000316045	0.000188952	IFNG/IL15/IL12B/S1PR2/HMOX1/IL10/RHOA	7	biological process
GO:0048260	positive regulation of receptor-mediated endocytosis	6/247	52/18723	6.08e-05	0.000323999	0.000193707	B2M/CCL19/CCL21/SYK/PLCG2/CBL	6	biological process
GO:0071357	cellular response to type I interferon	6/247	52/18723	6.08e-05	0.000323999	0.000193707	STAT1/PTPN6/IFNAR1/JAK1/IFNAR2/TBK1	6	biological process
GO:0010934	macrophage cytokine production	4/247	17/18723	6.15e-05	0.000326146	0.000194991	CD74/PLCG2/TGFB1/TLR4	4	biological process
GO:0010935	regulation of macrophage cytokine production	4/247	17/18723	6.15e-05	0.000326146	0.000194991	CD74/PLCG2/TGFB1/TLR4	4	biological process
GO:0016045	detection of bacterium	4/247	17/18723	6.15e-05	0.000326146	0.000194991	CD1D/NOD2/TLR2/TLR1	4	biological process
GO:0010522	regulation of calcium ion transport into cytosol	8/247	102/18723	6.18e-05	0.000327247	0.000195649	CXCL10/CXCL9/CXCL11/XCL1/CD19/PTPN6/CX3CL1/F2R	8	biological process
GO:0031667	response to nutrient levels	18/247	474/18723	6.21e-05	0.000328729	0.000196535	LTA/CXCL10/STAT1/IL15/CD40/VCAM1/ADRB2/FAS/CD3E/ICAM1/HAMP/NOD2/MAPK1/CYBB/HMOX1/BMP8A/NENF/CBL	18	biological process
GO:0010594	regulation of endothelial cell migration	12/247	232/18723	6.26e-05	0.000330862	0.00019781	CXCL13/TMSB4X/CD40/PIK3CG/PTK2/PIK3CD/SEMA4A/LGMN/TGFB1/GRN/HMOX1/RHOA	12	biological process
GO:0001667	ameboidal-type cell migration	18/247	475/18723	6.38e-05	0.000336663	0.000201278	IFNG/CXCL13/TMSB4X/CD40/CCR6/PIK3CG/PTK2/PIK3CD/PLCG2/SEMA4A/SEMA4D/LGMN/TGFB1/MMP9/GRN/HMOX1/EDN3/RHOA	18	biological process
GO:0006809	nitric oxide biosynthetic process	7/247	76/18723	6.44e-05	0.000338953	0.000202647	IFNG/ARG2/JAK2/CX3CR1/ICAM1/TLR4/IL10	7	biological process
GO:0022604	regulation of cell morphogenesis	14/247	309/18723	6.57e-05	0.000345292	0.000206438	CXCR4/PTK2/RAC2/SEMA4A/SEMA4D/CSF1R/ICAM1/CCL13/FGR/HCK/PLXNC1/MPL/ITGB2/RHOA	14	biological process
GO:0034110	regulation of homotypic cell-cell adhesion	5/247	33/18723	6.73e-05	0.00035351	0.000211351	CCL5/JAK2/SYK/PRKCQ/JAK1	5	biological process
GO:0032147	activation of protein kinase activity	9/247	134/18723	7.29e-05	0.000382136	0.000228465	TLR3/SOCS1/CCL5/IL12B/JAK2/ADRB2/IL6R/CD86/MALT1	9	biological process
GO:0002223	stimulatory C-type lectin receptor signaling pathway	4/247	18/18723	7.82e-05	0.000406812	0.000243218	SYK/PLCG2/KLRD1/TYROBP	4	biological process
GO:0002295	T-helper cell lineage commitment	4/247	18/18723	7.82e-05	0.000406812	0.000243218	IL12B/IL12RB1/IL6R/STAT3	4	biological process
GO:0150079	negative regulation of neuroinflammatory response	4/247	18/18723	7.82e-05	0.000406812	0.000243218	CX3CL1/PTPRC/GRN/TNFRSF1B	4	biological process
GO:1990840	response to lectin	4/247	18/18723	7.82e-05	0.000406812	0.000243218	SYK/PLCG2/KLRD1/TYROBP	4	biological process
GO:1990858	cellular response to lectin	4/247	18/18723	7.82e-05	0.000406812	0.000243218	SYK/PLCG2/KLRD1/TYROBP	4	biological process
GO:0000018	regulation of DNA recombination	8/247	107/18723	8.68e-05	0.000450642	0.000269422	CD40/IL7R/IL27RA/PTPRC/CD28/TGFB1/TNFSF4/IL10	8	biological process
GO:0110053	regulation of actin filament organization	13/247	278/18723	8.71e-05	0.00045191	0.00027018	TMSB4X/CCR7/CCL21/CX3CL1/GMFG/PTGER4/ICAM1/NOX4/CCL26/HCK/GRB2/NCK1/RHOA	13	biological process
GO:0032956	regulation of actin cytoskeleton organization	15/247	358/18723	8.73e-05	0.000451939	0.000270198	TMSB4X/CCR7/CCL21/RAC2/CX3CL1/GMFG/CSF1R/PTGER4/ICAM1/NOX4/CCL26/HCK/GRB2/NCK1/RHOA	15	biological process
GO:0032814	regulation of natural killer cell activation	5/247	35/18723	9.02e-05	0.000466117	0.000278674	IL15/IL12B/RASGRP1/FGR/TYROBP	5	biological process
GO:0032273	positive regulation of protein polymerization	9/247	138/18723	9.15e-05	0.000472434	0.000282451	CCR7/CCL21/GMFG/ICAM1/CCL26/HCK/GRB2/NCK1/RHOA	9	biological process
GO:0002888	positive regulation of myeloid leukocyte mediated immunity	4/247	19/18723	9.8e-05	0.000503857	0.000301237	BTK/PTAFR/ITGB2/TYROBP	4	biological process
GO:0043031	negative regulation of macrophage activation	4/247	19/18723	9.8e-05	0.000503857	0.000301237	FCGR2B/CX3CL1/PTPRC/GRN	4	biological process
GO:0070233	negative regulation of T cell apoptotic process	4/247	19/18723	9.8e-05	0.000503857	0.000301237	CCL5/IL7R/ARG2/PRKCQ	4	biological process
GO:0030833	regulation of actin filament polymerization	10/247	172/18723	9.84e-05	0.000504921	0.000301874	TMSB4X/CCR7/CCL21/GMFG/ICAM1/CCL26/HCK/GRB2/NCK1/RHOA	10	biological process
GO:0002691	regulation of cellular extravasation	5/247	36/18723	0.000103572	0.000529919	0.000316819	CCL21/IL27RA/PTGER4/ICAM1/PTAFR	5	biological process
GO:0030224	monocyte differentiation	5/247	36/18723	0.000103572	0.000529919	0.000316819	CD4/CD74/INPP5D/CSF1/CSF1R	5	biological process
GO:1902905	positive regulation of supramolecular fiber organization	11/247	209/18723	0.000108445	0.000554021	0.000331229	CCR7/CCL21/CX3CL1/GMFG/ICAM1/NOX4/CCL26/HCK/GRB2/NCK1/RHOA	11	biological process
GO:0034340	response to type I interferon	6/247	58/18723	0.000113115	0.000577022	0.00034498	STAT1/PTPN6/IFNAR1/JAK1/IFNAR2/TBK1	6	biological process
GO:0048771	tissue remodeling	10/247	175/18723	0.00011354	0.000578328	0.000345761	IL15/IL12B/SYK/RAC2/INPP5D/ADRB2/CSF1R/HAMP/TGFB1/F2R	10	biological process
GO:0032930	positive regulation of superoxide anion generation	4/247	20/18723	0.000121282	0.000616846	0.000368789	SYK/TGFB1/ITGB2/TYROBP	4	biological process
GO:0045862	positive regulation of proteolysis	15/247	372/18723	0.000133312	0.000677029	0.000404771	IFNG/FASLG/JAK2/PTK2/SYK/LCK/FAS/LGMN/STAT3/F2R/GRN/TANK/MALT1/TNFRSF1B/RHOA	15	biological process
GO:0009595	detection of biotic stimulus	5/247	38/18723	0.00013497	0.000683424	0.000408594	CD1D/TLR4/NOD2/TLR2/TLR1	5	biological process
GO:0097242	amyloid-beta clearance	5/247	38/18723	0.00013497	0.000683424	0.000408594	IFNG/MSR1/MARCO/C5AR1/ITGB2	5	biological process
GO:0010950	positive regulation of endopeptidase activity	10/247	179/18723	0.000136769	0.000691511	0.000413429	FASLG/JAK2/SYK/LCK/FAS/LGMN/STAT3/F2R/MALT1/RHOA	10	biological process
GO:0034103	regulation of tissue remodeling	7/247	86/18723	0.0001415	0.000714375	0.000427098	IL15/IL12B/SYK/INPP5D/CSF1R/HAMP/TGFB1	7	biological process
GO:0006925	inflammatory cell apoptotic process	4/247	21/18723	0.000148273	0.000746372	0.000446228	FASLG/PIK3CD/CTSL/NOD2	4	biological process
GO:0045655	regulation of monocyte differentiation	4/247	21/18723	0.000148273	0.000746372	0.000446228	CD4/CD74/INPP5D/CSF1	4	biological process
GO:0034113	heterotypic cell-cell adhesion	6/247	61/18723	0.000150147	0.000754698	0.000451206	CD1D/VCAM1/LCK/PTPRC/IL10/ITGB2	6	biological process
GO:0010212	response to ionizing radiation	9/247	148/18723	0.000156121	0.000781287	0.000467102	CXCL10/VCAM1/PTPRC/ICAM1/HAMP/NOX4/TANK/GRB2/CBL	9	biological process
GO:1903900	regulation of viral life cycle	9/247	148/18723	0.000156121	0.000781287	0.000467102	CD4/CD74/CIITA/APOBEC3G/APOBEC3F/CCL5/APOBEC3C/TRIM22/CD28	9	biological process
GO:2001056	positive regulation of cysteine-type endopeptidase activity	9/247	148/18723	0.000156121	0.000781287	0.000467102	FASLG/JAK2/SYK/LCK/FAS/LGMN/F2R/MALT1/RHOA	9	biological process
GO:0008154	actin polymerization or depolymerization	11/247	218/18723	0.000157217	0.000785628	0.000469698	TMSB4X/CCR7/CCL21/JAK2/GMFG/ICAM1/CCL26/HCK/GRB2/NCK1/RHOA	11	biological process
GO:0045428	regulation of nitric oxide biosynthetic process	6/247	62/18723	0.00016442	0.000820423	0.000490501	IFNG/JAK2/CX3CR1/ICAM1/TLR4/IL10	6	biological process
GO:1904994	regulation of leukocyte adhesion to vascular endothelial cell	5/247	40/18723	0.000173179	0.000862874	0.00051588	CCL21/ICAM1/PTAFR/ITGB2/RHOA	5	biological process
GO:0010720	positive regulation of cell development	13/247	298/18723	0.000173831	0.000864868	0.000517073	IFNG/LTA/CXCR4/CX3CL1/SEMA4D/CX3CR1/S1PR2/TGFB1/TLR2/PLXNC1/MPL/TNFRSF1B/TYROBP	13	biological process
GO:0002220	innate immune response activating cell surface receptor signaling pathway	4/247	22/18723	0.000179353	0.000889758	0.000531953	SYK/PLCG2/KLRD1/TYROBP	4	biological process
GO:0032816	positive regulation of natural killer cell activation	4/247	22/18723	0.000179353	0.000889758	0.000531953	IL15/IL12B/RASGRP1/TYROBP	4	biological process
GO:0046849	bone remodeling	7/247	90/18723	0.000188173	0.000932164	0.000557306	SYK/RAC2/INPP5D/ADRB2/CSF1R/HAMP/TGFB1	7	biological process
GO:0002251	organ or tissue specific immune response	5/247	41/18723	0.000195127	0.000963828	0.000576237	XCL1/IL6R/CAMP/NOD2/RNASE2	5	biological process
GO:0050856	regulation of T cell receptor signaling pathway	5/247	41/18723	0.000195127	0.000963828	0.000576237	CCR7/PTPN6/LCK/SH2D1A/MALT1	5	biological process
GO:0080164	regulation of nitric oxide metabolic process	6/247	64/18723	0.000196174	0.000966215	0.000577664	IFNG/JAK2/CX3CR1/ICAM1/TLR4/IL10	6	biological process
GO:1903409	reactive oxygen species biosynthetic process	6/247	64/18723	0.000196174	0.000966215	0.000577664	ARG2/PLCG2/TLR4/NOX4/STAT3/RHOA	6	biological process
GO:0008064	regulation of actin polymerization or depolymerization	10/247	188/18723	0.000204034	0.00100296	0.000599631	TMSB4X/CCR7/CCL21/GMFG/ICAM1/CCL26/HCK/GRB2/NCK1/RHOA	10	biological process
GO:0038127	ERBB signaling pathway	8/247	121/18723	0.000204512	0.00100296	0.000599631	FASLG/PTK2/LGMN/TGFB1/MMP9/MAPK1/GRB2/CBL	8	biological process
GO:1904019	epithelial cell apoptotic process	8/247	121/18723	0.000204512	0.00100296	0.000599631	CD40/CD40LG/PIK3CG/FASLG/JAK2/ICAM1/HMOX1/IL10	8	biological process
GO:0010001	glial cell differentiation	11/247	225/18723	0.000207027	0.00101384	0.000606138	IFNG/CXCR4/TGFB1/TLR4/TLR2/MAPK1/STAT3/GRN/C5AR1/TNFRSF1B/RHOA	11	biological process
GO:0030832	regulation of actin filament length	10/247	189/18723	0.000212982	0.00104151	0.000622682	TMSB4X/CCR7/CCL21/GMFG/ICAM1/CCL26/HCK/GRB2/NCK1/RHOA	10	biological process
GO:0045453	bone resorption	6/247	65/18723	0.000213767	0.00104386	0.000624088	SYK/RAC2/INPP5D/ADRB2/CSF1R/HAMP	6	biological process
GO:0051495	positive regulation of cytoskeleton organization	11/247	226/18723	0.00021513	0.00104903	0.000627175	CCR7/CCL21/CX3CL1/GMFG/ICAM1/NOX4/CCL26/HCK/GRB2/NCK1/RHOA	11	biological process
GO:0019730	antimicrobial humoral response	8/247	122/18723	0.000216411	0.00105378	0.000630013	CXCL10/CXCL9/CXCL11/CXCL13/GNLY/CAMP/CCL13/NOD2	8	biological process
GO:0040013	negative regulation of locomotion	15/247	391/18723	0.000228761	0.00111233	0.000665021	CD74/CXCL13/CCL21/CX3CL1/SEMA4A/SEMA4D/CX3CR1/IL27RA/PTGER4/S1PR2/TGFB1/STAT3/HMOX1/C5AR2/RHOA	15	biological process
GO:0050918	positive chemotaxis	6/247	66/18723	0.000232579	0.00112929	0.000675163	CXCL10/CCL5/CCR4/CX3CL1/IL16/CCL16	6	biological process
GO:0050673	epithelial cell proliferation	16/247	437/18723	0.000240572	0.00116645	0.000697378	B2M/STAT1/IL12B/PIK3CD/ESR1/TGFB1/NOD2/MAPK1/STAT3/GRN/HMOX1/CCL26/CCR3/IL10/C5AR1/C5AR2	16	biological process
GO:0070527	platelet aggregation	6/247	67/18723	0.000252671	0.00121331	0.000725391	PIK3CG/JAK2/SYK/PTPN6/PRKCQ/MPL	6	biological process
GO:0002524	hypersensitivity	3/247	10/18723	0.000254164	0.00121331	0.000725391	CCR7/BTK/FCGR2B	3	biological process
GO:0002887	negative regulation of myeloid leukocyte mediated immunity	3/247	10/18723	0.000254164	0.00121331	0.000725391	FCGR2B/CX3CR1/HMOX1	3	biological process
GO:0034756	regulation of iron ion transport	3/247	10/18723	0.000254164	0.00121331	0.000725391	B2M/IFNG/HAMP	3	biological process
GO:0070383	DNA cytosine deamination	3/247	10/18723	0.000254164	0.00121331	0.000725391	APOBEC3G/APOBEC3F/APOBEC3C	3	biological process
GO:0070391	response to lipoteichoic acid	3/247	10/18723	0.000254164	0.00121331	0.000725391	TLR4/TLR2/CD14	3	biological process
GO:0071223	cellular response to lipoteichoic acid	3/247	10/18723	0.000254164	0.00121331	0.000725391	TLR4/TLR2/CD14	3	biological process
GO:2000510	positive regulation of dendritic cell chemotaxis	3/247	10/18723	0.000254164	0.00121331	0.000725391	CCR6/CCR7/CCL21	3	biological process
GO:0001779	natural killer cell differentiation	4/247	24/18723	0.000255191	0.00121331	0.000725391	IL15/PIK3CD/PTPRC/RASGRP1	4	biological process
GO:0002438	acute inflammatory response to antigenic stimulus	4/247	24/18723	0.000255191	0.00121331	0.000725391	CCR7/BTK/FCGR2B/ICAM1	4	biological process
GO:0006213	pyrimidine nucleoside metabolic process	4/247	24/18723	0.000255191	0.00121331	0.000725391	APOBEC3G/APOBEC3F/APOBEC3C/TYMP	4	biological process
GO:0032928	regulation of superoxide anion generation	4/247	24/18723	0.000255191	0.00121331	0.000725391	SYK/TGFB1/ITGB2/TYROBP	4	biological process
GO:0043302	positive regulation of leukocyte degranulation	4/247	24/18723	0.000255191	0.00121331	0.000725391	SYK/FGR/PTAFR/ITGB2	4	biological process
GO:0050855	regulation of B cell receptor signaling pathway	4/247	24/18723	0.000255191	0.00121331	0.000725391	CD19/CD22/FCGR2B/CMTM3	4	biological process
GO:0032970	regulation of actin filament-based process	15/247	397/18723	0.000269189	0.00127809	0.000764122	TMSB4X/CCR7/CCL21/RAC2/CX3CL1/GMFG/CSF1R/PTGER4/ICAM1/NOX4/CCL26/HCK/GRB2/NCK1/RHOA	15	biological process
GO:0120162	positive regulation of cold-induced thermogenesis	7/247	97/18723	0.000299279	0.00141899	0.00084836	CXCR4/JAK2/SYK/CMKLR1/ADRB2/TSHR/THRA	7	biological process
GO:0010560	positive regulation of glycoprotein biosynthetic process	4/247	25/18723	0.000300669	0.00141903	0.000848385	IL15/CCL19/CCR7/CCL21	4	biological process
GO:0042832	defense response to protozoan	4/247	25/18723	0.000300669	0.00141903	0.000848385	CD40/IL12B/GBP2/IL10	4	biological process
GO:1904996	positive regulation of leukocyte adhesion to vascular endothelial cell	4/247	25/18723	0.000300669	0.00141903	0.000848385	ICAM1/PTAFR/ITGB2/RHOA	4	biological process
GO:2000116	regulation of cysteine-type endopeptidase activity	11/247	235/18723	0.000300944	0.00141903	0.000848385	FASLG/JAK2/SYK/LCK/FAS/LGMN/MMP9/F2R/MALT1/TNFSF14/RHOA	11	biological process
GO:0034101	erythrocyte homeostasis	8/247	129/18723	0.000316601	0.00148876	0.000890076	B2M/STAT1/JAK2/INPP5D/STAT3/HMOX1/INHBA/THRA	8	biological process
GO:0043280	positive regulation of cysteine-type endopeptidase activity involved in apoptotic process	8/247	129/18723	0.000316601	0.00148876	0.000890076	FASLG/JAK2/SYK/LCK/FAS/F2R/MALT1/RHOA	8	biological process
GO:0035094	response to nicotine	5/247	46/18723	0.000338294	0.00158859	0.000949759	B2M/VCAM1/NFKB1/MAPK1/HMOX1	5	biological process
GO:0002924	negative regulation of humoral immune response mediated by circulating immunoglobulin	3/247	11/18723	0.000346074	0.00160751	0.000961069	CR2/PTPN6/FCGR2B	3	biological process
GO:0032493	response to bacterial lipoprotein	3/247	11/18723	0.000346074	0.00160751	0.000961069	TLR2/TLR1/CD14	3	biological process
GO:0033632	regulation of cell-cell adhesion mediated by integrin	3/247	11/18723	0.000346074	0.00160751	0.000961069	CXCL13/CCL5/CD3E	3	biological process
GO:0043312	neutrophil degranulation	3/247	11/18723	0.000346074	0.00160751	0.000961069	SYK/PTAFR/ITGB2	3	biological process
GO:0045657	positive regulation of monocyte differentiation	3/247	11/18723	0.000346074	0.00160751	0.000961069	CD4/CD74/CSF1	3	biological process
GO:0046643	regulation of gamma-delta T cell activation	3/247	11/18723	0.000346074	0.00160751	0.000961069	SYK/PTPRC/NOD2	3	biological process
GO:0097048	dendritic cell apoptotic process	3/247	11/18723	0.000346074	0.00160751	0.000961069	CCL19/CCR7/CCL21	3	biological process
GO:2000668	regulation of dendritic cell apoptotic process	3/247	11/18723	0.000346074	0.00160751	0.000961069	CCL19/CCR7/CCL21	3	biological process
GO:0043542	endothelial cell migration	12/247	279/18723	0.000349806	0.00162254	0.000970058	CXCL13/TMSB4X/CD40/PIK3CG/PTK2/PIK3CD/SEMA4A/LGMN/TGFB1/GRN/HMOX1/RHOA	12	biological process
GO:0001562	response to protozoan	4/247	26/18723	0.000351677	0.00162254	0.000970058	CD40/IL12B/GBP2/IL10	4	biological process
GO:0050857	positive regulation of antigen receptor-mediated signaling pathway	4/247	26/18723	0.000351677	0.00162254	0.000970058	CCR7/LCK/PTPRC/CMTM3	4	biological process
GO:0070102	interleukin-6-mediated signaling pathway	4/247	26/18723	0.000351677	0.00162254	0.000970058	JAK2/IL6R/STAT3/JAK1	4	biological process
GO:1900017	positive regulation of cytokine production involved in inflammatory response	4/247	26/18723	0.000351677	0.00162254	0.000970058	TLR4/NOD2/STAT3/IL17RA	4	biological process
GO:0045646	regulation of erythrocyte differentiation	5/247	47/18723	0.000374535	0.00171875	0.00102758	B2M/STAT1/INPP5D/STAT3/INHBA	5	biological process
GO:0045911	positive regulation of DNA recombination	5/247	47/18723	0.000374535	0.00171875	0.00102758	CD40/PTPRC/CD28/TGFB1/TNFSF4	5	biological process
GO:0046677	response to antibiotic	5/247	47/18723	0.000374535	0.00171875	0.00102758	CIITA/CCR4/JAK2/JAK1/CBL	5	biological process
GO:0097028	dendritic cell differentiation	5/247	47/18723	0.000374535	0.00171875	0.00102758	CCL19/CCR7/FCGR2B/FLT3/RELB	5	biological process
GO:0010595	positive regulation of endothelial cell migration	8/247	133/18723	0.00038905	0.00178297	0.00106597	TMSB4X/CD40/PIK3CG/PIK3CD/LGMN/TGFB1/GRN/HMOX1	8	biological process
GO:0002719	negative regulation of cytokine production involved in immune response	4/247	27/18723	0.000408589	0.00186256	0.00111355	XCL1/TGFB1/HMOX1/IL10	4	biological process
GO:0036037	CD8-positive, alpha-beta T cell activation	4/247	27/18723	0.000408589	0.00186256	0.00111355	XCL1/SOCS1/IRF1/TNFSF8	4	biological process
GO:0042104	positive regulation of activated T cell proliferation	4/247	27/18723	0.000408589	0.00186256	0.00111355	IL12B/IL12RB1/IL27RA/IL2RA	4	biological process
GO:0060142	regulation of syncytium formation by plasma membrane fusion	4/247	27/18723	0.000408589	0.00186256	0.00111355	CXCL10/CXCL9/NFATC2/TYROBP	4	biological process
GO:0002673	regulation of acute inflammatory response	5/247	48/18723	0.000413635	0.00188056	0.00112432	PIK3CG/CCR7/BTK/FCGR2B/OSMR	5	biological process
GO:0002686	negative regulation of leukocyte migration	5/247	48/18723	0.000413635	0.00188056	0.00112432	CCL21/IL27RA/PTGER4/HMOX1/C5AR2	5	biological process
GO:0050679	positive regulation of epithelial cell proliferation	10/247	207/18723	0.000439884	0.00199725	0.00119408	PIK3CD/NOD2/STAT3/GRN/HMOX1/CCL26/CCR3/IL10/C5AR1/C5AR2	10	biological process
GO:0002762	negative regulation of myeloid leukocyte differentiation	5/247	49/18723	0.000455736	0.00204356	0.00122177	TLR3/INPP5D/TLR4/LILRB3/INHBA	5	biological process
GO:0006216	cytidine catabolic process	3/247	12/18723	0.000456943	0.00204356	0.00122177	APOBEC3G/APOBEC3F/APOBEC3C	3	biological process
GO:0009972	cytidine deamination	3/247	12/18723	0.000456943	0.00204356	0.00122177	APOBEC3G/APOBEC3F/APOBEC3C	3	biological process
GO:0016554	cytidine to uridine editing	3/247	12/18723	0.000456943	0.00204356	0.00122177	APOBEC3G/APOBEC3F/APOBEC3C	3	biological process
GO:0032621	interleukin-18 production	3/247	12/18723	0.000456943	0.00204356	0.00122177	NOD2/TLR2/IL10	3	biological process
GO:0032661	regulation of interleukin-18 production	3/247	12/18723	0.000456943	0.00204356	0.00122177	NOD2/TLR2/IL10	3	biological process
GO:0043380	regulation of memory T cell differentiation	3/247	12/18723	0.000456943	0.00204356	0.00122177	IL12B/IL12RB1/TNFSF4	3	biological process
GO:0046087	cytidine metabolic process	3/247	12/18723	0.000456943	0.00204356	0.00122177	APOBEC3G/APOBEC3F/APOBEC3C	3	biological process
GO:0060907	positive regulation of macrophage cytokine production	3/247	12/18723	0.000456943	0.00204356	0.00122177	CD74/PLCG2/TLR4	3	biological process
GO:0072683	T cell extravasation	3/247	12/18723	0.000456943	0.00204356	0.00122177	IL27RA/ITGAL/ICAM1	3	biological process
GO:2000508	regulation of dendritic cell chemotaxis	3/247	12/18723	0.000456943	0.00204356	0.00122177	CCR6/CCR7/CCL21	3	biological process
GO:0007200	phospholipase C-activating G protein-coupled receptor signaling pathway	7/247	104/18723	0.000457833	0.00204356	0.00122177	CMKLR1/CX3CR1/ESR1/F2R/C5AR1/C5AR2/C3AR1	7	biological process
GO:0032963	collagen metabolic process	7/247	104/18723	0.000457833	0.00204356	0.00122177	CIITA/CTSB/CTSL/CTSS/TGFB1/MMP9/F2R	7	biological process
GO:0034121	regulation of toll-like receptor signaling pathway	6/247	75/18723	0.000467053	0.002082	0.00124475	TLR3/IRF1/ESR1/NOD2/TLR2/TLR1	6	biological process
GO:0002474	antigen processing and presentation of peptide antigen via MHC class I	4/247	28/18723	0.000471783	0.0020895	0.00124923	B2M/MR1/TAPBPL/FCER1G	4	biological process
GO:0002507	tolerance induction	4/247	28/18723	0.000471783	0.0020895	0.00124923	CCR4/CD3E/ICOS/IL2RA	4	biological process
GO:0002675	positive regulation of acute inflammatory response	4/247	28/18723	0.000471783	0.0020895	0.00124923	PIK3CG/CCR7/BTK/OSMR	4	biological process
GO:0045671	negative regulation of osteoclast differentiation	4/247	28/18723	0.000471783	0.0020895	0.00124923	TLR3/INPP5D/TLR4/LILRB3	4	biological process
GO:1903020	positive regulation of glycoprotein metabolic process	4/247	28/18723	0.000471783	0.0020895	0.00124923	IL15/CCL19/CCR7/CCL21	4	biological process
GO:0043281	regulation of cysteine-type endopeptidase activity involved in apoptotic process	10/247	209/18723	0.000474359	0.00209589	0.00125305	FASLG/JAK2/SYK/LCK/FAS/MMP9/F2R/MALT1/TNFSF14/RHOA	10	biological process
GO:0045471	response to ethanol	8/247	137/18723	0.000474448	0.00209589	0.00125305	VCAM1/ICAM1/HAMP/CYBB/STAT3/CD14/RHOA/CBL	8	biological process
GO:0062207	regulation of pattern recognition receptor signaling pathway	7/247	105/18723	0.000485113	0.00214024	0.00127957	TLR3/IRF1/ESR1/TLR4/NOD2/TLR2/TLR1	7	biological process
GO:0001961	positive regulation of cytokine-mediated signaling pathway	5/247	50/18723	0.000500985	0.00220716	0.00131958	CD74/CXCR4/TXK/CSF1/TBK1	5	biological process
GO:0031100	animal organ regeneration	6/247	76/18723	0.000501569	0.00220716	0.00131958	FLT3/HAMP/HMOX1/IL10/C5AR1/IGF2R	6	biological process
GO:0033028	myeloid cell apoptotic process	4/247	29/18723	0.00054164	0.00238044	0.00142318	PIK3CD/CTSL/NOD2/THRA	4	biological process
GO:0050678	regulation of epithelial cell proliferation	14/247	381/18723	0.000565473	0.002482	0.0014839	B2M/STAT1/IL12B/PIK3CD/TGFB1/NOD2/STAT3/GRN/HMOX1/CCL26/CCR3/IL10/C5AR1/C5AR2	14	biological process
GO:0001768	establishment of T cell polarity	3/247	13/18723	0.000588252	0.00255904	0.00152996	CCL19/CCR7/CCL21	3	biological process
GO:0034112	positive regulation of homotypic cell-cell adhesion	3/247	13/18723	0.000588252	0.00255904	0.00152996	CCL5/JAK2/JAK1	3	biological process
GO:0043379	memory T cell differentiation	3/247	13/18723	0.000588252	0.00255904	0.00152996	IL12B/IL12RB1/TNFSF4	3	biological process
GO:0051709	regulation of killing of cells of other organism	3/247	13/18723	0.000588252	0.00255904	0.00152996	IFNG/SYK/PRF1	3	biological process
GO:0070234	positive regulation of T cell apoptotic process	3/247	13/18723	0.000588252	0.00255904	0.00152996	IDO1/CCL5/PDCD1	3	biological process
GO:0070486	leukocyte aggregation	3/247	13/18723	0.000588252	0.00255904	0.00152996	RAC2/SEMA4D/ZAP70	3	biological process
GO:1903977	positive regulation of glial cell migration	3/247	13/18723	0.000588252	0.00255904	0.00152996	CX3CL1/CX3CR1/CSF1	3	biological process
GO:0032535	regulation of cellular component size	14/247	383/18723	0.000595281	0.00258634	0.00154628	TMSB4X/IL7R/CCR7/CCL21/VAV1/SEMA4A/SEMA4D/GMFG/ICAM1/CCL26/HCK/GRB2/NCK1/RHOA	14	biological process
GO:1903426	regulation of reactive oxygen species biosynthetic process	5/247	52/18723	0.000601527	0.00261017	0.00156052	ARG2/PLCG2/TLR4/STAT3/RHOA	5	biological process
GO:0007202	activation of phospholipase C activity	4/247	30/18723	0.000618545	0.00267386	0.0015986	TXK/ITK/CD86/C5AR1	4	biological process
GO:0043304	regulation of mast cell degranulation	4/247	30/18723	0.000618545	0.00267386	0.0015986	SYK/RAC2/HMOX1/FGR	4	biological process
GO:0050858	negative regulation of antigen receptor-mediated signaling pathway	4/247	30/18723	0.000618545	0.00267386	0.0015986	CD22/PTPN6/FCGR2B/SH2D1A	4	biological process
GO:0030336	negative regulation of cell migration	13/247	344/18723	0.000683696	0.00295178	0.00176476	CD74/CXCL13/CCL21/CX3CL1/CX3CR1/IL27RA/PTGER4/S1PR2/TGFB1/STAT3/HMOX1/C5AR2/RHOA	13	biological process
GO:0033006	regulation of mast cell activation involved in immune response	4/247	31/18723	0.000702883	0.0030308	0.001812	SYK/RAC2/HMOX1/FGR	4	biological process
GO:0048708	astrocyte differentiation	6/247	81/18723	0.000704972	0.00303217	0.00181282	IFNG/TLR4/MAPK1/STAT3/GRN/C5AR1	6	biological process
GO:0051817	modulation of process of other organism involved in symbiotic interaction	6/247	81/18723	0.000704972	0.00303217	0.00181282	CD4/CCL5/CX3CR1/CCL8/CCL4/IGF2R	6	biological process
GO:0001767	establishment of lymphocyte polarity	3/247	14/18723	0.00074141	0.00315329	0.00188524	CCL19/CCR7/CCL21	3	biological process
GO:0002517	T cell tolerance induction	3/247	14/18723	0.00074141	0.00315329	0.00188524	CD3E/ICOS/IL2RA	3	biological process
GO:0002756	MyD88-independent toll-like receptor signaling pathway	3/247	14/18723	0.00074141	0.00315329	0.00188524	TLR3/CD40/TLR4	3	biological process
GO:0002864	regulation of acute inflammatory response to antigenic stimulus	3/247	14/18723	0.00074141	0.00315329	0.00188524	CCR7/BTK/FCGR2B	3	biological process
GO:0043374	CD8-positive, alpha-beta T cell differentiation	3/247	14/18723	0.00074141	0.00315329	0.00188524	SOCS1/IRF1/TNFSF8	3	biological process
GO:0045006	DNA deamination	3/247	14/18723	0.00074141	0.00315329	0.00188524	APOBEC3G/APOBEC3F/APOBEC3C	3	biological process
GO:0046131	pyrimidine ribonucleoside metabolic process	3/247	14/18723	0.00074141	0.00315329	0.00188524	APOBEC3G/APOBEC3F/APOBEC3C	3	biological process
GO:0046133	pyrimidine ribonucleoside catabolic process	3/247	14/18723	0.00074141	0.00315329	0.00188524	APOBEC3G/APOBEC3F/APOBEC3C	3	biological process
GO:0090715	immunological memory formation process	3/247	14/18723	0.00074141	0.00315329	0.00188524	IL12B/IL12RB1/TNFSF4	3	biological process
GO:0002244	hematopoietic progenitor cell differentiation	7/247	114/18723	0.000793572	0.00336471	0.00201163	PTPN6/CSF1R/FLT3/TNFRSF13B/PTPRC/TGFB1/INHBA	7	biological process
GO:0010743	regulation of macrophage derived foam cell differentiation	4/247	32/18723	0.000795045	0.00336471	0.00201163	CSF1/NFKB1/CETP/MSR1	4	biological process
GO:0019835	cytolysis	4/247	32/18723	0.000795045	0.00336471	0.00201163	MICB/GZMB/PRF1/TGFB1	4	biological process
GO:0035456	response to interferon-beta	4/247	32/18723	0.000795045	0.00336471	0.00201163	TLR3/STAT1/IRF1/IFNAR2	4	biological process
GO:0007015	actin filament organization	15/247	442/18723	0.000820671	0.00346888	0.00207391	TMSB4X/CCR7/CCL21/JAK2/RAC2/CX3CL1/GMFG/PTGER4/ICAM1/NOX4/CCL26/HCK/GRB2/NCK1/RHOA	15	biological process
GO:0050769	positive regulation of neurogenesis	10/247	225/18723	0.000839483	0.00354402	0.00211884	IFNG/LTA/CXCR4/CX3CL1/SEMA4D/CX3CR1/TGFB1/TLR2/PLXNC1/TNFRSF1B	10	biological process
GO:0098586	cellular response to virus	6/247	84/18723	0.000854503	0.00360299	0.0021541	CXCL10/TLR3/TLR7/CCL5/CCL19/NFKB1	6	biological process
GO:0045648	positive regulation of erythrocyte differentiation	4/247	33/18723	0.000895418	0.00376625	0.0022517	STAT1/INPP5D/STAT3/INHBA	4	biological process
GO:0050901	leukocyte tethering or rolling	4/247	33/18723	0.000895418	0.00376625	0.0022517	VCAM1/CCL21/CX3CR1/PTAFR	4	biological process
GO:0001894	tissue homeostasis	11/247	268/18723	0.000900665	0.00378368	0.00226212	B2M/SYK/RAC2/INPP5D/CSF1/ADRB2/CSF1R/HAMP/TLR4/NOD2/F2R	11	biological process
GO:0023035	CD40 signaling pathway	3/247	15/18723	0.000917766	0.00383129	0.00229059	CD40/CD40LG/CD86	3	biological process
GO:0032725	positive regulation of granulocyte macrophage colony-stimulating factor production	3/247	15/18723	0.000917766	0.00383129	0.00229059	IL12B/SYK/RASGRP1	3	biological process
GO:0098760	response to interleukin-7	3/247	15/18723	0.000917766	0.00383129	0.00229059	IL7R/BTK/IL2RG	3	biological process
GO:0098761	cellular response to interleukin-7	3/247	15/18723	0.000917766	0.00383129	0.00229059	IL7R/BTK/IL2RG	3	biological process
GO:1903799	negative regulation of production of miRNAs involved in gene silencing by miRNA	3/247	15/18723	0.000917766	0.00383129	0.00229059	ESR1/TGFB1/STAT3	3	biological process
GO:0033619	membrane protein proteolysis	5/247	57/18723	0.000918706	0.00383129	0.00229059	IFNG/PRKCQ/TGFB1/IL10/TNFRSF1B	5	biological process
GO:2001233	regulation of apoptotic signaling pathway	13/247	356/18723	0.000936702	0.0039016	0.00233262	CD74/CYLD/CX3CL1/CX3CR1/LCK/FAS/PTPRC/ICAM1/MMP9/PRDX2/HMOX1/INHBA/NCK1	13	biological process
GO:0060249	anatomical structure homeostasis	12/247	314/18723	0.000991451	0.00412463	0.00246596	B2M/SYK/RAC2/INPP5D/CX3CL1/CSF1/ADRB2/CSF1R/HAMP/TLR4/NOD2/F2R	12	biological process
GO:0001954	positive regulation of cell-matrix adhesion	5/247	58/18723	0.000994705	0.00413315	0.00247106	CCR7/CCL21/CX3CL1/CSF1/CD3E	5	biological process
GO:0055094	response to lipoprotein particle	4/247	34/18723	0.00100439	0.00416835	0.0024921	SYK/FCER1G/TLR4/ITGB2	4	biological process
GO:2000146	negative regulation of cell motility	13/247	359/18723	0.00101097	0.00419056	0.00250538	CD74/CXCL13/CCL21/CX3CL1/CX3CR1/IL27RA/PTGER4/S1PR2/TGFB1/STAT3/HMOX1/C5AR2/RHOA	13	biological process
GO:0051962	positive regulation of nervous system development	11/247	272/18723	0.00101571	0.00420514	0.0025141	IFNG/LTA/CXCR4/CX3CL1/SEMA4A/SEMA4D/CX3CR1/TGFB1/TLR2/PLXNC1/TNFRSF1B	11	biological process
GO:0030218	erythrocyte differentiation	7/247	120/18723	0.00107344	0.00443878	0.00265378	B2M/STAT1/JAK2/INPP5D/STAT3/INHBA/THRA	7	biological process
GO:0050732	negative regulation of peptidyl-tyrosine phosphorylation	5/247	59/18723	0.00107528	0.00444102	0.00265512	SOCS1/PTPN6/SEMA4D/PTPRC/CBL	5	biological process
GO:0050829	defense response to Gram-negative bacterium	6/247	88/18723	0.00109058	0.00449881	0.00268967	CD4/MR1/IL12B/IL6R/CAMP/TLR4	6	biological process
GO:0007160	cell-matrix adhesion	10/247	233/18723	0.00109447	0.00450403	0.00269279	VCAM1/CCR7/CCL21/PTK2/CX3CL1/CSF1/ITGAL/CD3E/ITGB2/RHOA	10	biological process
GO:0032271	regulation of protein polymerization	10/247	233/18723	0.00109447	0.00450403	0.00269279	TMSB4X/CCR7/CCL21/GMFG/ICAM1/CCL26/HCK/GRB2/NCK1/RHOA	10	biological process
GO:0001503	ossification	14/247	408/18723	0.00109588	0.00450439	0.00269301	PTK2/SEMA4D/CSF1/ADRB2/IL6R/PTGER4/TGFB1/MMP9/MAPK1/CCR1/FGR/BMP8A/THRA/RHOA	14	biological process
GO:0002713	negative regulation of B cell mediated immunity	3/247	16/18723	0.0011186	0.00455952	0.00272597	CR2/PTPN6/FCGR2B	3	biological process
GO:0002890	negative regulation of immunoglobulin mediated immune response	3/247	16/18723	0.0011186	0.00455952	0.00272597	CR2/PTPN6/FCGR2B	3	biological process
GO:0002921	negative regulation of humoral immune response	3/247	16/18723	0.0011186	0.00455952	0.00272597	CR2/PTPN6/FCGR2B	3	biological process
GO:0033631	cell-cell adhesion mediated by integrin	3/247	16/18723	0.0011186	0.00455952	0.00272597	CXCL13/CCL5/CD3E	3	biological process
GO:0045869	negative regulation of single stranded viral RNA replication via double stranded DNA intermediate	3/247	16/18723	0.0011186	0.00455952	0.00272597	APOBEC3G/APOBEC3F/APOBEC3C	3	biological process
GO:0046135	pyrimidine nucleoside catabolic process	3/247	16/18723	0.0011186	0.00455952	0.00272597	APOBEC3G/APOBEC3F/APOBEC3C	3	biological process
GO:2001267	regulation of cysteine-type endopeptidase activity involved in apoptotic signaling pathway	3/247	16/18723	0.0011186	0.00455952	0.00272597	JAK2/FAS/MMP9	3	biological process
GO:0051851	modulation by host of symbiont process	5/247	60/18723	0.00116059	0.00472504	0.00282493	CCL5/CX3CR1/CCL8/CCL4/IGF2R	5	biological process
GO:1904705	regulation of vascular associated smooth muscle cell proliferation	6/247	90/18723	0.00122592	0.0049851	0.00298041	JAK2/S1PR2/MMP9/HMOX1/IL10/RHOA	6	biological process
GO:0051271	negative regulation of cellular component movement	13/247	367/18723	0.00123349	0.00500995	0.00299526	CD74/CXCL13/CCL21/CX3CL1/CX3CR1/IL27RA/PTGER4/S1PR2/TGFB1/STAT3/HMOX1/C5AR2/RHOA	13	biological process
GO:0071402	cellular response to lipoprotein particle stimulus	4/247	36/18723	0.00124971	0.00506383	0.00302747	SYK/FCER1G/TLR4/ITGB2	4	biological process
GO:0090322	regulation of superoxide metabolic process	4/247	36/18723	0.00124971	0.00506383	0.00302747	SYK/TGFB1/ITGB2/TYROBP	4	biological process
GO:0043434	response to peptide hormone	14/247	414/18723	0.00125825	0.00509243	0.00304457	STAT1/SOCS1/JAK2/PTK2/TSHR/PRKCQ/ICAM1/NFKB1/TLR2/CYBB/STAT3/IL10/GRB2/NCK1	14	biological process
GO:0031099	regeneration	9/247	198/18723	0.00129537	0.00523648	0.0031307	JAK2/TXK/FLT3/HAMP/GRN/HMOX1/IL10/C5AR1/IGF2R	9	biological process
GO:1990874	vascular associated smooth muscle cell proliferation	6/247	91/18723	0.00129822	0.00524182	0.00313389	JAK2/S1PR2/MMP9/HMOX1/IL10/RHOA	6	biological process
GO:0032604	granulocyte macrophage colony-stimulating factor production	3/247	17/18723	0.00134513	0.00540574	0.00323189	IL12B/SYK/RASGRP1	3	biological process
GO:0032645	regulation of granulocyte macrophage colony-stimulating factor production	3/247	17/18723	0.00134513	0.00540574	0.00323189	IL12B/SYK/RASGRP1	3	biological process
GO:0090713	immunological memory process	3/247	17/18723	0.00134513	0.00540574	0.00323189	IL12B/IL12RB1/TNFSF4	3	biological process
GO:0097067	cellular response to thyroid hormone stimulus	3/247	17/18723	0.00134513	0.00540574	0.00323189	CTSB/CTSL/CTSS	3	biological process
GO:1903532	positive regulation of secretion by cell	11/247	282/18723	0.00135735	0.00544846	0.00325743	IFNG/JAK2/SYK/TGFB1/TLR4/TLR2/FGR/EDN3/PTAFR/INHBA/ITGB2	11	biological process
GO:0048525	negative regulation of viral process	6/247	92/18723	0.00137374	0.00550782	0.00329292	CIITA/APOBEC3G/STAT1/APOBEC3F/CCL5/APOBEC3C	6	biological process
GO:0072529	pyrimidine-containing compound catabolic process	4/247	37/18723	0.00138683	0.00555379	0.0033204	APOBEC3G/APOBEC3F/APOBEC3C/TYMP	4	biological process
GO:0034250	positive regulation of cellular amide metabolic process	8/247	162/18723	0.00141531	0.00566125	0.00338465	IFNG/CCL5/CD28/NOD2/MAPK1/PTAFR/NCK1/RHOA	8	biological process
GO:0032088	negative regulation of NF-kappaB transcription factor activity	6/247	93/18723	0.00145257	0.0058035	0.00346969	TMSB4X/CYLD/CMKLR1/NOD2/PRDX2/IL10	6	biological process
GO:0002385	mucosal immune response	4/247	38/18723	0.0015341	0.00611776	0.00365758	XCL1/CAMP/NOD2/RNASE2	4	biological process
GO:0051702	biological process involved in interaction with symbiont	6/247	94/18723	0.00153479	0.00611776	0.00365758	CCL5/CX3CR1/CAMP/CCL8/CCL4/IGF2R	6	biological process
GO:0001952	regulation of cell-matrix adhesion	7/247	128/18723	0.00156106	0.00621524	0.00371586	CCR7/CCL21/PTK2/CX3CL1/CSF1/CD3E/RHOA	7	biological process
GO:0034134	toll-like receptor 2 signaling pathway	3/247	18/18723	0.00159851	0.00634959	0.00379619	NOD2/TLR2/TLR1	3	biological process
GO:1900424	regulation of defense response to bacterium	3/247	18/18723	0.00159851	0.00634959	0.00379619	ARG2/NOD2/GRN	3	biological process
GO:0072577	endothelial cell apoptotic process	5/247	65/18723	0.00166419	0.00660283	0.00394759	CD40/CD40LG/FASLG/ICAM1/IL10	5	biological process
GO:0002347	response to tumor cell	4/247	39/18723	0.00169192	0.00670511	0.00400874	MR1/IL12B/PRF1/PRDX2	4	biological process
GO:1904035	regulation of epithelial cell apoptotic process	6/247	96/18723	0.00170983	0.00676825	0.00404649	CD40/CD40LG/FASLG/JAK2/ICAM1/HMOX1	6	biological process
GO:0014015	positive regulation of gliogenesis	5/247	66/18723	0.00178154	0.00704115	0.00420964	LTA/CXCR4/TGFB1/TLR2/TNFRSF1B	5	biological process
GO:0019079	viral genome replication	7/247	131/18723	0.00178288	0.00704115	0.00420964	APOBEC3G/APOBEC3F/CCL5/APOBEC3C/CXCR6/CD28/CCL8	7	biological process
GO:1902903	regulation of supramolecular fiber organization	13/247	383/18723	0.00180213	0.00710897	0.00425019	TMSB4X/CCR7/CCL21/CX3CL1/GMFG/PTGER4/ICAM1/NOX4/CCL26/HCK/GRB2/NCK1/RHOA	13	biological process
GO:0045429	positive regulation of nitric oxide biosynthetic process	4/247	40/18723	0.00186068	0.00731467	0.00437317	IFNG/JAK2/ICAM1/TLR4	4	biological process
GO:0070266	necroptotic process	4/247	40/18723	0.00186068	0.00731467	0.00437317	TLR3/CYLD/FASLG/FAS	4	biological process
GO:0071276	cellular response to cadmium ion	4/247	40/18723	0.00186068	0.00731467	0.00437317	MMP9/MAPK1/CYBB/HMOX1	4	biological process
GO:0002902	regulation of B cell apoptotic process	3/247	19/18723	0.00187985	0.00732287	0.00437807	CD74/BTK/IL10	3	biological process
GO:0010744	positive regulation of macrophage derived foam cell differentiation	3/247	19/18723	0.00187985	0.00732287	0.00437807	CSF1/NFKB1/MSR1	3	biological process
GO:0045091	regulation of single stranded viral RNA replication via double stranded DNA intermediate	3/247	19/18723	0.00187985	0.00732287	0.00437807	APOBEC3G/APOBEC3F/APOBEC3C	3	biological process
GO:1901739	regulation of myoblast fusion	3/247	19/18723	0.00187985	0.00732287	0.00437807	CXCL10/CXCL9/NFATC2	3	biological process
GO:1903975	regulation of glial cell migration	3/247	19/18723	0.00187985	0.00732287	0.00437807	CX3CL1/CX3CR1/CSF1	3	biological process
GO:1903978	regulation of microglial cell activation	3/247	19/18723	0.00187985	0.00732287	0.00437807	CX3CL1/PTPRC/GRN	3	biological process
GO:2000319	regulation of T-helper 17 cell differentiation	3/247	19/18723	0.00187985	0.00732287	0.00437807	IL12B/IL12RB1/MALT1	3	biological process
GO:2001185	regulation of CD8-positive, alpha-beta T cell activation	3/247	19/18723	0.00187985	0.00732287	0.00437807	XCL1/SOCS1/IRF1	3	biological process
GO:0061180	mammary gland epithelium development	5/247	67/18723	0.00190483	0.00741176	0.00443122	JAK2/CSF1/CSF1R/ESR1/MAPK1	5	biological process
GO:0051048	negative regulation of secretion	8/247	171/18723	0.00199074	0.00773724	0.00462581	CD74/IL12B/FCGR2B/F2R/HMOX1/BMP8A/INHBA/TNFRSF1B	8	biological process
GO:0030100	regulation of endocytosis	9/247	211/18723	0.0020052	0.00778461	0.00465413	B2M/CCL19/CCL21/SYK/CD22/PLCG2/CD14/PPP3CC/CBL	9	biological process
GO:0046686	response to cadmium ion	5/247	68/18723	0.00203425	0.00788849	0.00471623	B2M/MMP9/MAPK1/CYBB/HMOX1	5	biological process
GO:0042307	positive regulation of protein import into nucleus	4/247	41/18723	0.00204073	0.00789258	0.00471868	IFNG/JAK2/TGFB1/MAPK1	4	biological process
GO:1904407	positive regulation of nitric oxide metabolic process	4/247	41/18723	0.00204073	0.00789258	0.00471868	IFNG/JAK2/ICAM1/TLR4	4	biological process
GO:0051258	protein polymerization	11/247	297/18723	0.00204222	0.00789258	0.00471868	TMSB4X/CCR7/CCL21/JAK2/GMFG/ICAM1/CCL26/HCK/GRB2/NCK1/RHOA	11	biological process
GO:0003159	morphogenesis of an endothelium	3/247	20/18723	0.00219019	0.00841699	0.00503221	CXCL10/CXCR4/RHOA	3	biological process
GO:0016553	base conversion or substitution editing	3/247	20/18723	0.00219019	0.00841699	0.00503221	APOBEC3G/APOBEC3F/APOBEC3C	3	biological process
GO:0039692	single stranded viral RNA replication via double stranded DNA intermediate	3/247	20/18723	0.00219019	0.00841699	0.00503221	APOBEC3G/APOBEC3F/APOBEC3C	3	biological process
GO:0042359	vitamin D metabolic process	3/247	20/18723	0.00219019	0.00841699	0.00503221	IFNG/LGMN/NFKB1	3	biological process
GO:0061154	endothelial tube morphogenesis	3/247	20/18723	0.00219019	0.00841699	0.00503221	CXCL10/CXCR4/RHOA	3	biological process
GO:0099024	plasma membrane invagination	7/247	136/18723	0.00220615	0.00845937	0.00505755	RAC2/FCGR2B/PLCG2/MSR1/MARCO/ITGB2/RHOA	7	biological process
GO:1903305	regulation of regulated secretory pathway	7/247	136/18723	0.00220615	0.00845937	0.00505755	SYK/RAC2/FCGR2B/HMOX1/FGR/PTAFR/ITGB2	7	biological process
GO:0030574	collagen catabolic process	4/247	42/18723	0.00223248	0.00851273	0.00508945	CTSB/CTSL/CTSS/MMP9	4	biological process
GO:0033003	regulation of mast cell activation	4/247	42/18723	0.00223248	0.00851273	0.00508945	SYK/RAC2/HMOX1/FGR	4	biological process
GO:0045687	positive regulation of glial cell differentiation	4/247	42/18723	0.00223248	0.00851273	0.00508945	CXCR4/TGFB1/TLR2/TNFRSF1B	4	biological process
GO:0046596	regulation of viral entry into host cell	4/247	42/18723	0.00223248	0.00851273	0.00508945	CD4/CD74/CIITA/TRIM22	4	biological process
GO:1904037	positive regulation of epithelial cell apoptotic process	4/247	42/18723	0.00223248	0.00851273	0.00508945	CD40/CD40LG/FASLG/JAK2	4	biological process
GO:0070482	response to oxygen levels	12/247	347/18723	0.00229688	0.00874858	0.00523045	LTA/VCAM1/CXCR4/FAS/ICAM1/TLR2/NOX4/CYBB/HMOX1/MPL/RHOA/CBL	12	biological process
GO:0006509	membrane protein ectodomain proteolysis	4/247	43/18723	0.00243629	0.0092283	0.00551726	IFNG/PRKCQ/IL10/TNFRSF1B	4	biological process
GO:0014002	astrocyte development	4/247	43/18723	0.00243629	0.0092283	0.00551726	IFNG/TLR4/GRN/C5AR1	4	biological process
GO:0046636	negative regulation of alpha-beta T cell activation	4/247	43/18723	0.00243629	0.0092283	0.00551726	XCL1/SOCS1/ARG2/TNFSF4	4	biological process
GO:1904591	positive regulation of protein import	4/247	43/18723	0.00243629	0.0092283	0.00551726	IFNG/JAK2/TGFB1/MAPK1	4	biological process
GO:1904706	negative regulation of vascular associated smooth muscle cell proliferation	4/247	43/18723	0.00243629	0.0092283	0.00551726	S1PR2/HMOX1/IL10/RHOA	4	biological process
GO:0019233	sensory perception of pain	6/247	103/18723	0.00244382	0.0092466	0.0055282	IL12B/CXCR4/MAPK1/F2R/IL10/PTAFR	6	biological process
GO:0042454	ribonucleoside catabolic process	3/247	21/18723	0.00253051	0.0095325	0.00569913	APOBEC3G/APOBEC3F/APOBEC3C	3	biological process
GO:0048714	positive regulation of oligodendrocyte differentiation	3/247	21/18723	0.00253051	0.0095325	0.00569913	CXCR4/TLR2/TNFRSF1B	3	biological process
GO:0061081	positive regulation of myeloid leukocyte cytokine production involved in immune response	3/247	21/18723	0.00253051	0.0095325	0.00569913	CD74/PLCG2/TLR4	3	biological process
GO:2000774	positive regulation of cellular senescence	3/247	21/18723	0.00253051	0.0095325	0.00569913	B2M/KIR2DL4/ARG2	3	biological process
GO:0009266	response to temperature stimulus	8/247	178/18723	0.00255441	0.00961198	0.00574664	MICB/CXCL10/CXCR4/ADRB2/HSPA6/CD14/HMOX1/THRA	8	biological process
GO:1903036	positive regulation of response to wounding	5/247	72/18723	0.00261678	0.00983588	0.00588051	CXCR4/PTK2/F2R/GRN/PRDX2	5	biological process
GO:0001936	regulation of endothelial cell proliferation	8/247	179/18723	0.0026442	0.00992675	0.00593484	STAT1/IL12B/PIK3CD/STAT3/HMOX1/CCL26/CCR3/IL10	8	biological process
GO:0045124	regulation of bone resorption	4/247	44/18723	0.00265254	0.00992675	0.00593484	SYK/INPP5D/CSF1R/HAMP	4	biological process
GO:0046006	regulation of activated T cell proliferation	4/247	44/18723	0.00265254	0.00992675	0.00593484	IL12B/IL12RB1/IL27RA/IL2RA	4	biological process
GO:0062208	positive regulation of pattern recognition receptor signaling pathway	4/247	44/18723	0.00265254	0.00992675	0.00593484	TLR3/TLR4/TLR2/TLR1	4	biological process
GO:0010810	regulation of cell-substrate adhesion	9/247	221/18723	0.00273896	0.010239	0.00612152	CCR7/CCL21/JAK2/PTK2/RAC2/CX3CL1/CSF1/CD3E/RHOA	9	biological process
GO:0051047	positive regulation of secretion	11/247	310/18723	0.00284236	0.010614	0.00634569	IFNG/JAK2/SYK/TGFB1/TLR4/TLR2/FGR/EDN3/PTAFR/INHBA/ITGB2	11	biological process
GO:2000273	positive regulation of signaling receptor activity	4/247	45/18723	0.00288159	0.0107487	0.00642627	IFNG/JAK2/ADRB2/IL10	4	biological process
GO:0010310	regulation of hydrogen peroxide metabolic process	3/247	22/18723	0.00290174	0.0107653	0.00643619	RAC2/STAT3/PRDX2	3	biological process
GO:0032693	negative regulation of interleukin-10 production	3/247	22/18723	0.00290174	0.0107653	0.00643619	IL12B/FCGR2B/TYROBP	3	biological process
GO:0060965	negative regulation of gene silencing by miRNA	3/247	22/18723	0.00290174	0.0107653	0.00643619	ESR1/TGFB1/STAT3	3	biological process
GO:0071404	cellular response to low-density lipoprotein particle stimulus	3/247	22/18723	0.00290174	0.0107653	0.00643619	SYK/FCER1G/ITGB2	3	biological process
GO:1900120	regulation of receptor binding	3/247	22/18723	0.00290174	0.0107653	0.00643619	B2M/MMP9/IL10	3	biological process
GO:0031532	actin cytoskeleton reorganization	6/247	107/18723	0.00295752	0.0109604	0.00655283	GMFG/CSF1R/S1PR2/HCK/GRB2/RHOA	6	biological process
GO:0010324	membrane invagination	7/247	144/18723	0.00304007	0.011242	0.00672118	RAC2/FCGR2B/PLCG2/MSR1/MARCO/ITGB2/RHOA	7	biological process
GO:0031644	regulation of nervous system process	7/247	144/18723	0.00304007	0.011242	0.00672118	ADRB2/S1PR2/F2R/IL10/TYMP/PTAFR/TNFRSF1B	7	biological process
GO:0002832	negative regulation of response to biotic stimulus	6/247	108/18723	0.00309768	0.0114304	0.00683382	KIR2DL4/MICB/ARG2/KLRD1/GRN/PRDX2	6	biological process
GO:0007173	epidermal growth factor receptor signaling pathway	6/247	108/18723	0.00309768	0.0114304	0.00683382	FASLG/PTK2/TGFB1/MMP9/GRB2/CBL	6	biological process
GO:2001259	positive regulation of cation channel activity	5/247	75/18723	0.00312677	0.0115253	0.00689056	IFNG/TMSB4X/PLCG2/ADRB2/CTSS	5	biological process
GO:0032414	positive regulation of ion transmembrane transporter activity	6/247	109/18723	0.00324274	0.01194	0.00713847	IFNG/TMSB4X/PLCG2/ADRB2/CTSS/PTAFR	6	biological process
GO:0007189	adenylate cyclase-activating G protein-coupled receptor signaling pathway	7/247	146/18723	0.00328193	0.0120713	0.00721698	CXCL10/CXCL9/CXCL11/ADRB2/PTGER4/S1PR2/TSHR	7	biological process
GO:0045662	negative regulation of myoblast differentiation	3/247	23/18723	0.00330477	0.0121163	0.00724389	CXCL10/CCL17/TGFB1	3	biological process
GO:0060143	positive regulation of syncytium formation by plasma membrane fusion	3/247	23/18723	0.00330477	0.0121163	0.00724389	CXCL9/NFATC2/TYROBP	3	biological process
GO:0060396	growth hormone receptor signaling pathway	3/247	23/18723	0.00330477	0.0121163	0.00724389	JAK2/PTK2/STAT3	3	biological process
GO:0031589	cell-substrate adhesion	12/247	363/18723	0.00331148	0.0121279	0.00725084	VCAM1/CCR7/CCL21/JAK2/PTK2/RAC2/CX3CL1/CSF1/ITGAL/CD3E/ITGB2/RHOA	12	biological process
GO:0052547	regulation of peptidase activity	14/247	461/18723	0.00336777	0.0123209	0.00736623	FASLG/JAK2/SYK/LCK/FAS/LGMN/MMP9/STAT3/F2R/GRN/TANK/MALT1/TNFSF14/RHOA	14	biological process
GO:0003044	regulation of systemic arterial blood pressure mediated by a chemical signal	4/247	47/18723	0.00337955	0.0123246	0.00736841	ADRB2/F2R/EDN3/RHOA	4	biological process
GO:0050798	activated T cell proliferation	4/247	47/18723	0.00337955	0.0123246	0.00736841	IL12B/IL12RB1/IL27RA/IL2RA	4	biological process
GO:0097300	programmed necrotic cell death	4/247	47/18723	0.00337955	0.0123246	0.00736841	TLR3/CYLD/FASLG/FAS	4	biological process
GO:0050767	regulation of neurogenesis	12/247	364/18723	0.00338531	0.0123325	0.00737312	B2M/IFNG/LTA/CXCR4/CX3CL1/SEMA4A/SEMA4D/CX3CR1/TGFB1/TLR2/PLXNC1/TNFRSF1B	12	biological process
GO:0048259	regulation of receptor-mediated endocytosis	6/247	110/18723	0.00339281	0.0123467	0.00738161	B2M/CCL19/CCL21/SYK/PLCG2/CBL	6	biological process
GO:1903531	negative regulation of secretion by cell	7/247	147/18723	0.00340823	0.0123896	0.0074073	IL12B/FCGR2B/F2R/HMOX1/BMP8A/INHBA/TNFRSF1B	7	biological process
GO:0009410	response to xenobiotic stimulus	14/247	462/18723	0.00343312	0.0124669	0.00745348	B2M/LTA/TLR3/STAT1/CXCR4/NFATC2/LCK/ICAM1/CYBB/STAT3/HMOX1/IL10/INHBA/RHOA	14	biological process
GO:0071695	anatomical structure maturation	9/247	229/18723	0.00346701	0.0125766	0.0075191	IL15/CCR6/CCL19/CCL21/BTK/CX3CL1/SEMA4D/CX3CR1/RHOA	9	biological process
GO:0001938	positive regulation of endothelial cell proliferation	6/247	111/18723	0.00354799	0.0128568	0.00768658	PIK3CD/STAT3/HMOX1/CCL26/CCR3/IL10	6	biological process
GO:0001783	B cell apoptotic process	3/247	24/18723	0.00374042	0.0133983	0.00801035	CD74/BTK/IL10	3	biological process
GO:0033032	regulation of myeloid cell apoptotic process	3/247	24/18723	0.00374042	0.0133983	0.00801035	PIK3CD/NOD2/THRA	3	biological process
GO:0035458	cellular response to interferon-beta	3/247	24/18723	0.00374042	0.0133983	0.00801035	TLR3/STAT1/IRF1	3	biological process
GO:0045649	regulation of macrophage differentiation	3/247	24/18723	0.00374042	0.0133983	0.00801035	CSF1/TGFB1/INHBA	3	biological process
GO:0051043	regulation of membrane protein ectodomain proteolysis	3/247	24/18723	0.00374042	0.0133983	0.00801035	IFNG/IL10/TNFRSF1B	3	biological process
GO:0060149	negative regulation of posttranscriptional gene silencing	3/247	24/18723	0.00374042	0.0133983	0.00801035	ESR1/TGFB1/STAT3	3	biological process
GO:0060967	negative regulation of gene silencing by RNA	3/247	24/18723	0.00374042	0.0133983	0.00801035	ESR1/TGFB1/STAT3	3	biological process
GO:0071378	cellular response to growth hormone stimulus	3/247	24/18723	0.00374042	0.0133983	0.00801035	JAK2/PTK2/STAT3	3	biological process
GO:0090343	positive regulation of cell aging	3/247	24/18723	0.00374042	0.0133983	0.00801035	B2M/KIR2DL4/ARG2	3	biological process
GO:2000353	positive regulation of endothelial cell apoptotic process	3/247	24/18723	0.00374042	0.0133983	0.00801035	CD40/CD40LG/FASLG	3	biological process
GO:2001026	regulation of endothelial cell chemotaxis	3/247	24/18723	0.00374042	0.0133983	0.00801035	CXCL13/TMSB4X/LGMN	3	biological process
GO:0036293	response to decreased oxygen levels	11/247	322/18723	0.00378925	0.013559	0.00810643	LTA/VCAM1/CXCR4/ICAM1/TLR2/NOX4/CYBB/HMOX1/MPL/RHOA/CBL	11	biological process
GO:0007188	adenylate cyclase-modulating G protein-coupled receptor signaling pathway	9/247	233/18723	0.003884	0.0138836	0.00830048	CXCL10/CXCL9/CXCL11/ADRB2/PTGER4/S1PR2/TSHR/MARCO/CCR3	9	biological process
GO:0050832	defense response to fungus	4/247	49/18723	0.00393305	0.0140296	0.0083878	GNLY/PLCG2/CX3CR1/HAMP	4	biological process
GO:0052372	modulation by symbiont of entry into host	4/247	49/18723	0.00393305	0.0140296	0.0083878	CD4/CD74/CIITA/TRIM22	4	biological process
GO:2001236	regulation of extrinsic apoptotic signaling pathway	7/247	151/18723	0.00395087	0.0140786	0.00841705	CYLD/CX3CL1/PTPRC/ICAM1/PRDX2/HMOX1/INHBA	7	biological process
GO:0001935	endothelial cell proliferation	8/247	193/18723	0.00417957	0.0148781	0.00889504	STAT1/IL12B/PIK3CD/STAT3/HMOX1/CCL26/CCR3/IL10	8	biological process
GO:0033622	integrin activation	3/247	25/18723	0.00420948	0.0149071	0.00891242	CXCL13/CX3CL1/PTGER4	3	biological process
GO:0048143	astrocyte activation	3/247	25/18723	0.00420948	0.0149071	0.00891242	IFNG/GRN/C5AR1	3	biological process
GO:0070423	nucleotide-binding oligomerization domain containing signaling pathway	3/247	25/18723	0.00420948	0.0149071	0.00891242	CYLD/TLR4/NOD2	3	biological process
GO:0090330	regulation of platelet aggregation	3/247	25/18723	0.00420948	0.0149071	0.00891242	JAK2/SYK/PRKCQ	3	biological process
GO:1903798	regulation of production of miRNAs involved in gene silencing by miRNA	3/247	25/18723	0.00420948	0.0149071	0.00891242	ESR1/TGFB1/STAT3	3	biological process
GO:0030278	regulation of ossification	6/247	115/18723	0.00422191	0.0149357	0.0089295	CSF1/ADRB2/PTGER4/TGFB1/MAPK1/CCR1	6	biological process
GO:0043124	negative regulation of I-kappaB kinase/NF-kappaB signaling	4/247	51/18723	0.00454484	0.0160121	0.00957301	STAT1/ESR1/TANK/RHOA	4	biological process
GO:0045661	regulation of myoblast differentiation	4/247	51/18723	0.00454484	0.0160121	0.00957301	CXCL10/CXCL9/CCL17/TGFB1	4	biological process
GO:0046850	regulation of bone remodeling	4/247	51/18723	0.00454484	0.0160121	0.00957301	SYK/INPP5D/CSF1R/HAMP	4	biological process
GO:1903307	positive regulation of regulated secretory pathway	4/247	51/18723	0.00454484	0.0160121	0.00957301	SYK/FGR/PTAFR/ITGB2	4	biological process
GO:0072527	pyrimidine-containing compound metabolic process	5/247	82/18723	0.00458963	0.0161532	0.00965742	APOBEC3G/APOBEC3F/APOBEC3C/MAPK1/TYMP	5	biological process
GO:0002418	immune response to tumor cell	3/247	26/18723	0.00471267	0.0165016	0.00986568	MR1/IL12B/PRF1	3	biological process
GO:0009164	nucleoside catabolic process	3/247	26/18723	0.00471267	0.0165016	0.00986568	APOBEC3G/APOBEC3F/APOBEC3C	3	biological process
GO:0035872	nucleotide-binding domain, leucine rich repeat containing receptor signaling pathway	3/247	26/18723	0.00471267	0.0165016	0.00986568	CYLD/TLR4/NOD2	3	biological process
GO:0070920	regulation of production of small RNA involved in gene silencing by RNA	3/247	26/18723	0.00471267	0.0165016	0.00986568	ESR1/TGFB1/STAT3	3	biological process
GO:0097066	response to thyroid hormone	3/247	26/18723	0.00471267	0.0165016	0.00986568	CTSB/CTSL/CTSS	3	biological process
GO:0051101	regulation of DNA binding	6/247	118/18723	0.00478618	0.0167419	0.0100093	IFNG/TMSB4X/JAK2/TGFB1/MMP9/HMOX1	6	biological process
GO:0032411	positive regulation of transporter activity	6/247	120/18723	0.00519197	0.0181428	0.0108469	IFNG/TMSB4X/PLCG2/ADRB2/CTSS/PTAFR	6	biological process
GO:0002227	innate immune response in mucosa	3/247	27/18723	0.00525068	0.0182734	0.010925	CAMP/NOD2/RNASE2	3	biological process
GO:0010528	regulation of transposition	3/247	27/18723	0.00525068	0.0182734	0.010925	APOBEC3G/APOBEC3F/APOBEC3C	3	biological process
GO:0010529	negative regulation of transposition	3/247	27/18723	0.00525068	0.0182734	0.010925	APOBEC3G/APOBEC3F/APOBEC3C	3	biological process
GO:0032703	negative regulation of interleukin-2 production	3/247	27/18723	0.00525068	0.0182734	0.010925	XCL1/PTPRC/NOD2	3	biological process
GO:0007265	Ras protein signal transduction	11/247	337/18723	0.00531086	0.0184322	0.01102	PIK3CG/RAC2/RASGRP3/CSF1/LAT/GRAP2/RASGRP1/F2R/GRB2/RHOA/CBL	11	biological process
GO:0062197	cellular response to chemical stress	11/247	337/18723	0.00531086	0.0184322	0.01102	JAK2/BTK/FAS/RELB/MMP9/TLR4/MAPK1/PRDX2/HMOX1/IL10/IL18RAP	11	biological process
GO:0071375	cellular response to peptide hormone stimulus	10/247	290/18723	0.00531244	0.0184322	0.01102	STAT1/SOCS1/JAK2/PTK2/TSHR/PRKCQ/NFKB1/STAT3/GRB2/NCK1	10	biological process
GO:0045069	regulation of viral genome replication	5/247	85/18723	0.0053451	0.0185268	0.0110765	APOBEC3G/APOBEC3F/CCL5/APOBEC3C/CD28	5	biological process
GO:0002455	humoral immune response mediated by circulating immunoglobulin	6/247	121/18723	0.00540407	0.0187123	0.0111874	LTA/CR2/PTPN6/FCGR2B/PTPRC/NOD2	6	biological process
GO:0090316	positive regulation of intracellular protein transport	7/247	160/18723	0.00540962	0.0187126	0.0111876	IFNG/JAK2/RAC2/GZMB/TGFB1/MAPK1/ITGB2	7	biological process
GO:0017157	regulation of exocytosis	8/247	202/18723	0.00548053	0.0189388	0.0113228	IFNG/SYK/RAC2/FCGR2B/HMOX1/FGR/PTAFR/ITGB2	8	biological process
GO:0045921	positive regulation of exocytosis	5/247	86/18723	0.00561536	0.0193656	0.011578	IFNG/SYK/FGR/PTAFR/ITGB2	5	biological process
GO:0048864	stem cell development	5/247	86/18723	0.00561536	0.0193656	0.011578	SEMA4A/SEMA4D/PTPRC/MAPK1/EDN3	5	biological process
GO:0051100	negative regulation of binding	7/247	162/18723	0.00578237	0.0199216	0.0119104	B2M/TMSB4X/JAK2/ADRB2/HMOX1/CCL23/IL10	7	biological process
GO:0051656	establishment of organelle localization	12/247	390/18723	0.0058228	0.0199452	0.0119245	PTGDS/PIK3CG/SYK/BTK/RAC2/PIK3CD/LAT/RASGRP1/HMOX1/FGR/PTGDR/CBL	12	biological process
GO:0002313	mature B cell differentiation involved in immune response	3/247	28/18723	0.00582415	0.0199452	0.0119245	FCGR2B/PLCG2/IL10	3	biological process
GO:0010575	positive regulation of vascular endothelial growth factor production	3/247	28/18723	0.00582415	0.0199452	0.0119245	TGFB1/C5AR1/C3AR1	3	biological process
GO:0032958	inositol phosphate biosynthetic process	3/247	28/18723	0.00582415	0.0199452	0.0119245	PLCG2/CD244/PTAFR	3	biological process
GO:0034123	positive regulation of toll-like receptor signaling pathway	3/247	28/18723	0.00582415	0.0199452	0.0119245	TLR3/TLR2/TLR1	3	biological process
GO:0080111	DNA demethylation	3/247	28/18723	0.00582415	0.0199452	0.0119245	APOBEC3G/APOBEC3F/APOBEC3C	3	biological process
GO:0010811	positive regulation of cell-substrate adhesion	6/247	123/18723	0.00584719	0.0200042	0.0119597	CCR7/CCL21/JAK2/CX3CL1/CSF1/CD3E	6	biological process
GO:0000768	syncytium formation by plasma membrane fusion	4/247	55/18723	0.00595405	0.0202887	0.0121299	CXCL10/CXCL9/NFATC2/TYROBP	4	biological process
GO:0043331	response to dsRNA	4/247	55/18723	0.00595405	0.0202887	0.0121299	TLR3/NFKB1/NOD2/MAPK1	4	biological process
GO:0048016	inositol phosphate-mediated signaling	4/247	55/18723	0.00595405	0.0202887	0.0121299	NFATC2/PLCG2/PPP3CC/EDN3	4	biological process
GO:0140253	cell-cell fusion	4/247	55/18723	0.00595405	0.0202887	0.0121299	CXCL10/CXCL9/NFATC2/TYROBP	4	biological process
GO:0010508	positive regulation of autophagy	6/247	124/18723	0.00607843	0.020692	0.012371	IFNG/TRIM22/ADRB2/NOD2/HMOX1/TBK1	6	biological process
GO:0051960	regulation of nervous system development	13/247	443/18723	0.00616041	0.0209503	0.0125254	B2M/IFNG/LTA/CXCR4/CX3CL1/SEMA4A/SEMA4D/CX3CR1/TGFB1/TLR2/TYMP/PLXNC1/TNFRSF1B	13	biological process
GO:0010332	response to gamma radiation	4/247	56/18723	0.00634689	0.0214992	0.0128535	CXCL10/PTPRC/NOX4/CBL	4	biological process
GO:0031529	ruffle organization	4/247	56/18723	0.00634689	0.0214992	0.0128535	CCR7/CCL21/CSF1R/ICAM1	4	biological process
GO:0043388	positive regulation of DNA binding	4/247	56/18723	0.00634689	0.0214992	0.0128535	IFNG/JAK2/TGFB1/MMP9	4	biological process
GO:0045071	negative regulation of viral genome replication	4/247	56/18723	0.00634689	0.0214992	0.0128535	APOBEC3G/APOBEC3F/CCL5/APOBEC3C	4	biological process
GO:0060969	negative regulation of gene silencing	3/247	29/18723	0.00643367	0.0217716	0.0130164	ESR1/TGFB1/STAT3	3	biological process
GO:0014910	regulation of smooth muscle cell migration	5/247	89/18723	0.00648382	0.0219196	0.0131049	CCL5/S1PR2/TLR4/NOX4/RHOA	5	biological process
GO:2001235	positive regulation of apoptotic signaling pathway	6/247	126/18723	0.0065608	0.0221581	0.0132475	CYLD/LCK/FAS/PTPRC/INHBA/NCK1	6	biological process
GO:0043112	receptor metabolic process	7/247	166/18723	0.00658512	0.0222183	0.0132835	SYK/PLCG2/FCER1G/LGMN/TGFB1/ITGB2/GRB2	7	biological process
GO:0006949	syncytium formation	4/247	57/18723	0.00675656	0.0227743	0.0136159	CXCL10/CXCL9/NFATC2/TYROBP	4	biological process
GO:0045638	negative regulation of myeloid cell differentiation	5/247	90/18723	0.0067931	0.0228526	0.0136627	TLR3/INPP5D/TLR4/LILRB3/INHBA	5	biological process
GO:0061097	regulation of protein tyrosine kinase activity	5/247	90/18723	0.0067931	0.0228526	0.0136627	CCL5/CSF1R/PTPRC/NOX4/CBL	5	biological process
GO:0006911	phagocytosis, engulfment	6/247	127/18723	0.00681214	0.0228941	0.0136876	RAC2/FCGR2B/PLCG2/MSR1/MARCO/ITGB2	6	biological process
GO:0010800	positive regulation of peptidyl-threonine phosphorylation	3/247	30/18723	0.0070798	0.0237007	0.0141698	S1PR2/TGFB1/MAPK1	3	biological process
GO:0032480	negative regulation of type I interferon production	3/247	30/18723	0.0070798	0.0237007	0.0141698	CYLD/RELB/IL10	3	biological process
GO:0043032	positive regulation of macrophage activation	3/247	30/18723	0.0070798	0.0237007	0.0141698	HAMP/TLR4/IL10	3	biological process
GO:0060603	mammary gland duct morphogenesis	3/247	30/18723	0.0070798	0.0237007	0.0141698	CSF1/CSF1R/ESR1	3	biological process
GO:0002931	response to ischemia	4/247	58/18723	0.00718337	0.0239772	0.0143351	CX3CL1/CX3CR1/CSF1/CSF1R	4	biological process
GO:0010559	regulation of glycoprotein biosynthetic process	4/247	58/18723	0.00718337	0.0239772	0.0143351	IL15/CCL19/CCR7/CCL21	4	biological process
GO:0043525	positive regulation of neuron apoptotic process	4/247	58/18723	0.00718337	0.0239772	0.0143351	FASLG/GRN/TYROBP/RHOA	4	biological process
GO:0002291	T cell activation via T cell receptor contact with antigen bound to MHC molecule on antigen presenting cell	2/247	10/18723	0.0072742	0.0240927	0.0144041	ITGAL/ICAM1	2	biological process
GO:0033089	positive regulation of T cell differentiation in thymus	2/247	10/18723	0.0072742	0.0240927	0.0144041	IL7R/RASGRP1	2	biological process
GO:0040015	negative regulation of multicellular organism growth	2/247	10/18723	0.0072742	0.0240927	0.0144041	ADRB2/LGMN	2	biological process
GO:0042368	vitamin D biosynthetic process	2/247	10/18723	0.0072742	0.0240927	0.0144041	IFNG/NFKB1	2	biological process
GO:0045625	regulation of T-helper 1 cell differentiation	2/247	10/18723	0.0072742	0.0240927	0.0144041	CCL19/TNFSF4	2	biological process
GO:0045898	regulation of RNA polymerase II transcription preinitiation complex assembly	2/247	10/18723	0.0072742	0.0240927	0.0144041	ESR1/THRA	2	biological process
GO:2001223	negative regulation of neuron migration	2/247	10/18723	0.0072742	0.0240927	0.0144041	CX3CL1/STAT3	2	biological process
GO:2001269	positive regulation of cysteine-type endopeptidase activity involved in apoptotic signaling pathway	2/247	10/18723	0.0072742	0.0240927	0.0144041	JAK2/FAS	2	biological process
GO:0006310	DNA recombination	10/247	305/18723	0.00748161	0.0247558	0.0148005	CD40/CCR6/IL7R/CD40LG/IL27RA/PTPRC/CD28/TGFB1/TNFSF4/IL10	10	biological process
GO:0035306	positive regulation of dephosphorylation	4/247	59/18723	0.0076276	0.0251659	0.0150458	IFNG/JAK2/PTPRC/TGFB1	4	biological process
GO:0090303	positive regulation of wound healing	4/247	59/18723	0.0076276	0.0251659	0.0150458	CXCR4/PTK2/F2R/PRDX2	4	biological process
GO:2000351	regulation of endothelial cell apoptotic process	4/247	59/18723	0.0076276	0.0251659	0.0150458	CD40/CD40LG/FASLG/ICAM1	4	biological process
GO:0001782	B cell homeostasis	3/247	31/18723	0.00776304	0.0254657	0.015225	CD74/TNFSF13B/TNFRSF13B	3	biological process
GO:0030212	hyaluronan metabolic process	3/247	31/18723	0.00776304	0.0254657	0.015225	IL15/TGFB1/NFKB1	3	biological process
GO:0034656	nucleobase-containing small molecule catabolic process	3/247	31/18723	0.00776304	0.0254657	0.015225	APOBEC3G/APOBEC3F/APOBEC3C	3	biological process
GO:0035510	DNA dealkylation	3/247	31/18723	0.00776304	0.0254657	0.015225	APOBEC3G/APOBEC3F/APOBEC3C	3	biological process
GO:0045987	positive regulation of smooth muscle contraction	3/247	31/18723	0.00776304	0.0254657	0.015225	F2R/PTAFR/RHOA	3	biological process
GO:0070723	response to cholesterol	3/247	31/18723	0.00776304	0.0254657	0.015225	CCR5/TGFB1/INHBA	3	biological process
GO:0001666	response to hypoxia	10/247	307/18723	0.0078161	0.0256153	0.0153144	LTA/VCAM1/CXCR4/ICAM1/TLR2/NOX4/CYBB/HMOX1/MPL/RHOA	10	biological process
GO:1901136	carbohydrate derivative catabolic process	7/247	172/18723	0.00794097	0.0259997	0.0155442	APOBEC3G/APOBEC3F/APOBEC3C/CTSL/TGFB1/CHIT1/TYMP	7	biological process
GO:0042306	regulation of protein import into nucleus	4/247	60/18723	0.00808952	0.0264608	0.0158199	IFNG/JAK2/TGFB1/MAPK1	4	biological process
GO:0010039	response to iron ion	3/247	32/18723	0.00848387	0.0276451	0.016528	B2M/HAMP/HMOX1	3	biological process
GO:0032196	transposition	3/247	32/18723	0.00848387	0.0276451	0.016528	APOBEC3G/APOBEC3F/APOBEC3C	3	biological process
GO:0035767	endothelial cell chemotaxis	3/247	32/18723	0.00848387	0.0276451	0.016528	CXCL13/TMSB4X/LGMN	3	biological process
GO:2000515	negative regulation of CD4-positive, alpha-beta T cell activation	3/247	32/18723	0.00848387	0.0276451	0.016528	XCL1/ARG2/TNFSF4	3	biological process
GO:0007163	establishment or maintenance of cell polarity	8/247	218/18723	0.00853001	0.0277691	0.0166021	CCL19/CCR7/CCL21/PTK2/RAC2/CD3G/CCL4/RHOA	8	biological process
GO:0040014	regulation of multicellular organism growth	4/247	61/18723	0.00856943	0.027871	0.016663	CSF1/ADRB2/LGMN/STAT3	4	biological process
GO:0001787	natural killer cell proliferation	2/247	11/18723	0.00881379	0.0280535	0.0167722	IL15/IL12B	2	biological process
GO:0002357	defense response to tumor cell	2/247	11/18723	0.00881379	0.0280535	0.0167722	PRF1/PRDX2	2	biological process
GO:0002732	positive regulation of dendritic cell cytokine production	2/247	11/18723	0.00881379	0.0280535	0.0167722	PLCG2/NOD2	2	biological process
GO:0030656	regulation of vitamin metabolic process	2/247	11/18723	0.00881379	0.0280535	0.0167722	IFNG/NFKB1	2	biological process
GO:0032610	interleukin-1 alpha production	2/247	11/18723	0.00881379	0.0280535	0.0167722	CX3CL1/IL16	2	biological process
GO:0032650	regulation of interleukin-1 alpha production	2/247	11/18723	0.00881379	0.0280535	0.0167722	CX3CL1/IL16	2	biological process
GO:0032957	inositol trisphosphate metabolic process	2/247	11/18723	0.00881379	0.0280535	0.0167722	PLCG2/PTAFR	2	biological process
GO:0033210	leptin-mediated signaling pathway	2/247	11/18723	0.00881379	0.0280535	0.0167722	EBI3/STAT3	2	biological process
GO:0042789	mRNA transcription by RNA polymerase II	2/247	11/18723	0.00881379	0.0280535	0.0167722	STAT3/C5AR1	2	biological process
GO:0045628	regulation of T-helper 2 cell differentiation	2/247	11/18723	0.00881379	0.0280535	0.0167722	TNFSF4/CD86	2	biological process
GO:0046598	positive regulation of viral entry into host cell	2/247	11/18723	0.00881379	0.0280535	0.0167722	CD4/CD74	2	biological process
GO:0051132	NK T cell activation	2/247	11/18723	0.00881379	0.0280535	0.0167722	IL15/IL12B	2	biological process
GO:0071609	chemokine (C-C motif) ligand 5 production	2/247	11/18723	0.00881379	0.0280535	0.0167722	ARG2/IL10	2	biological process
GO:0071649	regulation of chemokine (C-C motif) ligand 5 production	2/247	11/18723	0.00881379	0.0280535	0.0167722	ARG2/IL10	2	biological process
GO:0071888	macrophage apoptotic process	2/247	11/18723	0.00881379	0.0280535	0.0167722	CTSL/NOD2	2	biological process
GO:0075294	positive regulation by symbiont of entry into host	2/247	11/18723	0.00881379	0.0280535	0.0167722	CD4/CD74	2	biological process
GO:0098792	xenophagy	2/247	11/18723	0.00881379	0.0280535	0.0167722	NOD2/TBK1	2	biological process
GO:0098883	synapse pruning	2/247	11/18723	0.00881379	0.0280535	0.0167722	CX3CL1/CX3CR1	2	biological process
GO:1900227	positive regulation of NLRP3 inflammasome complex assembly	2/247	11/18723	0.00881379	0.0280535	0.0167722	PLCG2/TLR4	2	biological process
GO:1900426	positive regulation of defense response to bacterium	2/247	11/18723	0.00881379	0.0280535	0.0167722	NOD2/GRN	2	biological process
GO:1904464	regulation of matrix metallopeptidase secretion	2/247	11/18723	0.00881379	0.0280535	0.0167722	TLR4/TLR2	2	biological process
GO:1990773	matrix metallopeptidase secretion	2/247	11/18723	0.00881379	0.0280535	0.0167722	TLR4/TLR2	2	biological process
GO:2000343	positive regulation of chemokine (C-X-C motif) ligand 2 production	2/247	11/18723	0.00881379	0.0280535	0.0167722	CD74/TLR4	2	biological process
GO:0009116	nucleoside metabolic process	4/247	62/18723	0.00906759	0.0287546	0.0171913	APOBEC3G/APOBEC3F/APOBEC3C/TYMP	4	biological process
GO:0010573	vascular endothelial growth factor production	4/247	62/18723	0.00906759	0.0287546	0.0171913	IL6R/TGFB1/C5AR1/C3AR1	4	biological process
GO:0046824	positive regulation of nucleocytoplasmic transport	4/247	62/18723	0.00906759	0.0287546	0.0171913	IFNG/JAK2/TGFB1/MAPK1	4	biological process
GO:0070265	necrotic cell death	4/247	62/18723	0.00906759	0.0287546	0.0171913	TLR3/CYLD/FASLG/FAS	4	biological process
GO:0014909	smooth muscle cell migration	5/247	97/18723	0.00925242	0.0293136	0.0175255	CCL5/S1PR2/TLR4/NOX4/RHOA	5	biological process
GO:0045727	positive regulation of translation	6/247	136/18723	0.00939766	0.0297462	0.0177842	CCL5/CD28/MAPK1/PTAFR/NCK1/RHOA	6	biological process
GO:0050708	regulation of protein secretion	9/247	268/18723	0.00943112	0.0298246	0.017831	IFNG/CCL5/IL12B/JAK2/TGFB1/TLR4/TLR2/F2R/BMP8A	9	biological process
GO:0000302	response to reactive oxygen species	8/247	222/18723	0.00945963	0.0298872	0.0178684	STAT1/BTK/MMP9/MAPK1/PRDX2/HMOX1/IL10/IL18RAP	8	biological process
GO:0016239	positive regulation of macroautophagy	4/247	63/18723	0.00958427	0.0302253	0.0180706	ADRB2/NOD2/HMOX1/TBK1	4	biological process
GO:1904589	regulation of protein import	4/247	63/18723	0.00958427	0.0302253	0.0180706	IFNG/JAK2/TGFB1/MAPK1	4	biological process
GO:0051051	negative regulation of transport	13/247	470/18723	0.0098516	0.0310398	0.0185575	CD74/IL12B/FCGR2B/ICAM1/HAMP/MMP9/NFKB1/TLR2/F2R/HMOX1/BMP8A/INHBA/TNFRSF1B	13	biological process
GO:0002446	neutrophil mediated immunity	3/247	34/18723	0.01004	0.0315752	0.0188777	SYK/PTAFR/ITGB2	3	biological process
GO:0010922	positive regulation of phosphatase activity	3/247	34/18723	0.01004	0.0315752	0.0188777	IFNG/JAK2/PTPRC	3	biological process
GO:0006940	regulation of smooth muscle contraction	4/247	64/18723	0.0101197	0.0317387	0.0189754	ADRB2/F2R/PTAFR/RHOA	4	biological process
GO:0046579	positive regulation of Ras protein signal transduction	4/247	64/18723	0.0101197	0.0317387	0.0189754	PIK3CG/CSF1/RASGRP1/F2R	4	biological process
GO:1903018	regulation of glycoprotein metabolic process	4/247	64/18723	0.0101197	0.0317387	0.0189754	IL15/CCL19/CCR7/CCL21	4	biological process
GO:0002024	diet induced thermogenesis	2/247	12/18723	0.0104852	0.0326163	0.0195	ADRB2/BMP8A	2	biological process
GO:0002664	regulation of T cell tolerance induction	2/247	12/18723	0.0104852	0.0326163	0.0195	CD3E/IL2RA	2	biological process
GO:0010455	positive regulation of cell fate commitment	2/247	12/18723	0.0104852	0.0326163	0.0195	IL12B/IL12RB1	2	biological process
GO:0032823	regulation of natural killer cell differentiation	2/247	12/18723	0.0104852	0.0326163	0.0195	IL15/RASGRP1	2	biological process
GO:0032908	regulation of transforming growth factor beta1 production	2/247	12/18723	0.0104852	0.0326163	0.0195	CX3CL1/TYROBP	2	biological process
GO:0035739	CD4-positive, alpha-beta T cell proliferation	2/247	12/18723	0.0104852	0.0326163	0.0195	XCL1/ARG2	2	biological process
GO:0043301	negative regulation of leukocyte degranulation	2/247	12/18723	0.0104852	0.0326163	0.0195	FCGR2B/HMOX1	2	biological process
GO:0060019	radial glial cell differentiation	2/247	12/18723	0.0104852	0.0326163	0.0195	STAT3/RHOA	2	biological process
GO:2000561	regulation of CD4-positive, alpha-beta T cell proliferation	2/247	12/18723	0.0104852	0.0326163	0.0195	XCL1/ARG2	2	biological process
GO:0038034	signal transduction in absence of ligand	4/247	65/18723	0.0106742	0.0331141	0.0197977	CX3CL1/FAS/PRDX2/INHBA	4	biological process
GO:0048524	positive regulation of viral process	4/247	65/18723	0.0106742	0.0331141	0.0197977	CD4/CD74/CCL5/CD28	4	biological process
GO:0097192	extrinsic apoptotic signaling pathway in absence of ligand	4/247	65/18723	0.0106742	0.0331141	0.0197977	CX3CL1/FAS/PRDX2/INHBA	4	biological process
GO:0009119	ribonucleoside metabolic process	3/247	35/18723	0.010876	0.0335882	0.0200811	APOBEC3G/APOBEC3F/APOBEC3C	3	biological process
GO:0039694	viral RNA genome replication	3/247	35/18723	0.010876	0.0335882	0.0200811	APOBEC3G/APOBEC3F/APOBEC3C	3	biological process
GO:0045907	positive regulation of vasoconstriction	3/247	35/18723	0.010876	0.0335882	0.0200811	ICAM1/F2R/RHOA	3	biological process
GO:0046627	negative regulation of insulin receptor signaling pathway	3/247	35/18723	0.010876	0.0335882	0.0200811	SOCS1/PRKCQ/NCK1	3	biological process
GO:0097421	liver regeneration	3/247	35/18723	0.010876	0.0335882	0.0200811	HAMP/HMOX1/IL10	3	biological process
GO:0010038	response to metal ion	11/247	373/18723	0.010945	0.033771	0.0201904	B2M/VCAM1/PLCG2/ICAM1/LGMN/HAMP/MMP9/MAPK1/CYBB/CD14/HMOX1	11	biological process
GO:0035296	regulation of tube diameter	6/247	141/18723	0.0111036	0.0341987	0.0204461	UTS2B/ADRB2/ICAM1/F2R/EDN3/RHOA	6	biological process
GO:0097746	blood vessel diameter maintenance	6/247	141/18723	0.0111036	0.0341987	0.0204461	UTS2B/ADRB2/ICAM1/F2R/EDN3/RHOA	6	biological process
GO:0019229	regulation of vasoconstriction	4/247	66/18723	0.0112479	0.034581	0.0206747	ICAM1/F2R/EDN3/RHOA	4	biological process
GO:0050922	negative regulation of chemotaxis	4/247	66/18723	0.0112479	0.034581	0.0206747	CXCL13/SEMA4A/SEMA4D/C5AR2	4	biological process
GO:1903829	positive regulation of cellular protein localization	9/247	276/18723	0.0112815	0.0346532	0.0207179	IFNG/JAK2/RAC2/CD247/GZMB/TGFB1/MAPK1/ITGB2/TYROBP	9	biological process
GO:0050808	synapse organization	12/247	426/18723	0.0112965	0.0346682	0.0207268	FCGR2B/CX3CL1/SEMA4A/SEMA4D/CX3CR1/IL10RA/LGMN/TLR2/F2R/IL10/C5AR1/RHOA	12	biological process
GO:0035150	regulation of tube size	6/247	142/18723	0.0114694	0.0351674	0.0210253	UTS2B/ADRB2/ICAM1/F2R/EDN3/RHOA	6	biological process
GO:0036314	response to sterol	3/247	36/18723	0.0117511	0.0359347	0.021484	CCR5/TGFB1/INHBA	3	biological process
GO:0045742	positive regulation of epidermal growth factor receptor signaling pathway	3/247	36/18723	0.0117511	0.0359347	0.021484	FASLG/MMP9/CBL	3	biological process
GO:1901658	glycosyl compound catabolic process	3/247	36/18723	0.0117511	0.0359347	0.021484	APOBEC3G/APOBEC3F/APOBEC3C	3	biological process
GO:0014013	regulation of gliogenesis	5/247	103/18723	0.0117993	0.0360499	0.0215529	LTA/CXCR4/TGFB1/TLR2/TNFRSF1B	5	biological process
GO:0062013	positive regulation of small molecule metabolic process	6/247	143/18723	0.0118436	0.0361532	0.0216146	CD74/IFNG/TMSB4X/CD244/STAT3/PTAFR	6	biological process
GO:0008217	regulation of blood pressure	7/247	186/18723	0.0118924	0.0362696	0.0216842	UTS2B/ADRB2/F2R/HMOX1/EDN3/PTAFR/RHOA	7	biological process
GO:0002551	mast cell chemotaxis	2/247	13/18723	0.0122846	0.0368753	0.0220464	RAC2/PIK3CD	2	biological process
GO:0002638	negative regulation of immunoglobulin production	2/247	13/18723	0.0122846	0.0368753	0.0220464	CD22/FCGR2B	2	biological process
GO:0014842	regulation of skeletal muscle satellite cell proliferation	2/247	13/18723	0.0122846	0.0368753	0.0220464	JAK2/STAT3	2	biological process
GO:0031272	regulation of pseudopodium assembly	2/247	13/18723	0.0122846	0.0368753	0.0220464	CCR7/CCL21	2	biological process
GO:0031274	positive regulation of pseudopodium assembly	2/247	13/18723	0.0122846	0.0368753	0.0220464	CCR7/CCL21	2	biological process
GO:0032252	secretory granule localization	2/247	13/18723	0.0122846	0.0368753	0.0220464	PIK3CG/RASGRP1	2	biological process
GO:0032905	transforming growth factor beta1 production	2/247	13/18723	0.0122846	0.0368753	0.0220464	CX3CL1/TYROBP	2	biological process
GO:0034135	regulation of toll-like receptor 2 signaling pathway	2/247	13/18723	0.0122846	0.0368753	0.0220464	NOD2/TLR1	2	biological process
GO:0042362	fat-soluble vitamin biosynthetic process	2/247	13/18723	0.0122846	0.0368753	0.0220464	IFNG/NFKB1	2	biological process
GO:0042492	gamma-delta T cell differentiation	2/247	13/18723	0.0122846	0.0368753	0.0220464	SYK/PTPRC	2	biological process
GO:0046642	negative regulation of alpha-beta T cell proliferation	2/247	13/18723	0.0122846	0.0368753	0.0220464	XCL1/ARG2	2	biological process
GO:0060670	branching involved in labyrinthine layer morphogenesis	2/247	13/18723	0.0122846	0.0368753	0.0220464	IL10/GRB2	2	biological process
GO:0071801	regulation of podosome assembly	2/247	13/18723	0.0122846	0.0368753	0.0220464	HCK/RHOA	2	biological process
GO:0072672	neutrophil extravasation	2/247	13/18723	0.0122846	0.0368753	0.0220464	PIK3CG/PIK3CD	2	biological process
GO:1900121	negative regulation of receptor binding	2/247	13/18723	0.0122846	0.0368753	0.0220464	B2M/IL10	2	biological process
GO:1900272	negative regulation of long-term synaptic potentiation	2/247	13/18723	0.0122846	0.0368753	0.0220464	CX3CR1/TYROBP	2	biological process
GO:1902947	regulation of tau-protein kinase activity	2/247	13/18723	0.0122846	0.0368753	0.0220464	IFNG/C5AR1	2	biological process
GO:1903054	negative regulation of extracellular matrix organization	2/247	13/18723	0.0122846	0.0368753	0.0220464	TGFB1/TNFRSF1B	2	biological process
GO:0021700	developmental maturation	9/247	280/18723	0.0123029	0.0368978	0.0220598	IL15/CCR6/CCL19/CCL21/BTK/CX3CL1/SEMA4D/CX3CR1/RHOA	9	biological process
GO:0009988	cell-cell recognition	4/247	68/18723	0.012454	0.0373185	0.0223114	CCL19/CCR7/CCL21/PRF1	4	biological process
GO:0052548	regulation of endopeptidase activity	12/247	432/18723	0.0125045	0.0374372	0.0223823	FASLG/JAK2/SYK/LCK/FAS/LGMN/MMP9/STAT3/F2R/MALT1/TNFSF14/RHOA	12	biological process
GO:0001990	regulation of systemic arterial blood pressure by hormone	3/247	37/18723	0.0126656	0.0377874	0.0225917	F2R/EDN3/RHOA	3	biological process
GO:0043029	T cell homeostasis	3/247	37/18723	0.0126656	0.0377874	0.0225917	FAS/TNFSF14/IL2RA	3	biological process
GO:0060416	response to growth hormone	3/247	37/18723	0.0126656	0.0377874	0.0225917	JAK2/PTK2/STAT3	3	biological process
GO:1900077	negative regulation of cellular response to insulin stimulus	3/247	37/18723	0.0126656	0.0377874	0.0225917	SOCS1/PRKCQ/NCK1	3	biological process
GO:0048732	gland development	12/247	436/18723	0.0133635	0.0398347	0.0238157	JAK2/CSF1/CSF1R/ESR1/HAMP/TGFB1/MAPK1/PRDX2/HMOX1/IL10/IGF2R/THRA	12	biological process
GO:0048713	regulation of oligodendrocyte differentiation	3/247	38/18723	0.0136197	0.0404579	0.0241883	CXCR4/TLR2/TNFRSF1B	3	biological process
GO:0051930	regulation of sensory perception of pain	3/247	38/18723	0.0136197	0.0404579	0.0241883	F2R/IL10/PTAFR	3	biological process
GO:1901186	positive regulation of ERBB signaling pathway	3/247	38/18723	0.0136197	0.0404579	0.0241883	FASLG/MMP9/CBL	3	biological process
GO:1903580	positive regulation of ATP metabolic process	3/247	38/18723	0.0136197	0.0404579	0.0241883	IFNG/TMSB4X/STAT3	3	biological process
GO:0002467	germinal center formation	2/247	14/18723	0.0142085	0.0417724	0.0249742	CXCL13/TNFSF13B	2	biological process
GO:0002829	negative regulation of type 2 immune response	2/247	14/18723	0.0142085	0.0417724	0.0249742	ARG2/IL27RA	2	biological process
GO:0003376	sphingosine-1-phosphate receptor signaling pathway	2/247	14/18723	0.0142085	0.0417724	0.0249742	PIK3CG/S1PR2	2	biological process
GO:0030213	hyaluronan biosynthetic process	2/247	14/18723	0.0142085	0.0417724	0.0249742	TGFB1/NFKB1	2	biological process
GO:0033008	positive regulation of mast cell activation involved in immune response	2/247	14/18723	0.0142085	0.0417724	0.0249742	SYK/FGR	2	biological process
GO:0043306	positive regulation of mast cell degranulation	2/247	14/18723	0.0142085	0.0417724	0.0249742	SYK/FGR	2	biological process
GO:0043922	negative regulation by host of viral transcription	2/247	14/18723	0.0142085	0.0417724	0.0249742	CCL5/CCL4	2	biological process
GO:0060732	positive regulation of inositol phosphate biosynthetic process	2/247	14/18723	0.0142085	0.0417724	0.0249742	CD244/PTAFR	2	biological process
GO:0097531	mast cell migration	2/247	14/18723	0.0142085	0.0417724	0.0249742	RAC2/PIK3CD	2	biological process
GO:1901857	positive regulation of cellular respiration	2/247	14/18723	0.0142085	0.0417724	0.0249742	IFNG/IFNAR1	2	biological process
GO:2001140	positive regulation of phospholipid transport	2/247	14/18723	0.0142085	0.0417724	0.0249742	FASLG/CETP	2	biological process
GO:2001171	positive regulation of ATP biosynthetic process	2/247	14/18723	0.0142085	0.0417724	0.0249742	TMSB4X/STAT3	2	biological process
GO:0034599	cellular response to oxidative stress	9/247	288/18723	0.0145506	0.0427415	0.0255535	JAK2/BTK/MMP9/TLR4/MAPK1/PRDX2/HMOX1/IL10/IL18RAP	9	biological process
GO:0051931	regulation of sensory perception	3/247	39/18723	0.0146137	0.0428536	0.0256206	F2R/IL10/PTAFR	3	biological process
GO:2000249	regulation of actin cytoskeleton reorganization	3/247	39/18723	0.0146137	0.0428536	0.0256206	GMFG/CSF1R/HCK	3	biological process
GO:0048545	response to steroid hormone	10/247	339/18723	0.0148938	0.0436375	0.0260893	JAK2/ESR1/FLT3/ICAM1/TGFB1/TLR2/CYBB/IL10/PTAFR/RHOA	10	biological process
GO:0002534	cytokine production involved in inflammatory response	4/247	72/18723	0.0151072	0.0440744	0.0263504	TLR4/NOD2/STAT3/IL17RA	4	biological process
GO:0043903	regulation of biological process involved in symbiotic interaction	4/247	72/18723	0.0151072	0.0440744	0.0263504	CD4/CD74/CIITA/TRIM22	4	biological process
GO:0051057	positive regulation of small GTPase mediated signal transduction	4/247	72/18723	0.0151072	0.0440744	0.0263504	PIK3CG/CSF1/RASGRP1/F2R	4	biological process
GO:0071479	cellular response to ionizing radiation	4/247	72/18723	0.0151072	0.0440744	0.0263504	HAMP/NOX4/TANK/GRB2	4	biological process
GO:1900015	regulation of cytokine production involved in inflammatory response	4/247	72/18723	0.0151072	0.0440744	0.0263504	TLR4/NOD2/STAT3/IL17RA	4	biological process
GO:0006939	smooth muscle contraction	5/247	110/18723	0.015328	0.0446047	0.0266675	ADRB2/F2R/EDN3/PTAFR/RHOA	5	biological process
GO:0009408	response to heat	5/247	110/18723	0.015328	0.0446047	0.0266675	MICB/CXCL10/HSPA6/CD14/HMOX1	5	biological process
GO:0014812	muscle cell migration	5/247	110/18723	0.015328	0.0446047	0.0266675	CCL5/S1PR2/TLR4/NOX4/RHOA	5	biological process
GO:0071526	semaphorin-plexin signaling pathway	3/247	40/18723	0.0156477	0.0454966	0.0272007	SEMA4A/SEMA4D/PLXNC1	3	biological process
GO:0035924	cellular response to vascular endothelial growth factor stimulus	4/247	73/18723	0.0158218	0.0459638	0.02748	IL12B/VCAM1/PIK3CD/FLT3	4	biological process
GO:0071248	cellular response to metal ion	7/247	197/18723	0.0158698	0.046064	0.02754	B2M/PLCG2/LGMN/MMP9/MAPK1/CYBB/HMOX1	7	biological process
GO:0002836	positive regulation of response to tumor cell	2/247	15/18723	0.0162532	0.0466632	0.0278982	MR1/IL12B	2	biological process
GO:0002839	positive regulation of immune response to tumor cell	2/247	15/18723	0.0162532	0.0466632	0.0278982	MR1/IL12B	2	biological process
GO:0010763	positive regulation of fibroblast migration	2/247	15/18723	0.0162532	0.0466632	0.0278982	PTK2/TGFB1	2	biological process
GO:0014841	skeletal muscle satellite cell proliferation	2/247	15/18723	0.0162532	0.0466632	0.0278982	JAK2/STAT3	2	biological process
GO:0014857	regulation of skeletal muscle cell proliferation	2/247	15/18723	0.0162532	0.0466632	0.0278982	JAK2/STAT3	2	biological process
GO:0031269	pseudopodium assembly	2/247	15/18723	0.0162532	0.0466632	0.0278982	CCR7/CCL21	2	biological process
GO:0042994	cytoplasmic sequestering of transcription factor	2/247	15/18723	0.0162532	0.0466632	0.0278982	TMSB4X/IL10	2	biological process
GO:0045064	T-helper 2 cell differentiation	2/247	15/18723	0.0162532	0.0466632	0.0278982	TNFSF4/CD86	2	biological process
GO:0045217	cell-cell junction maintenance	2/247	15/18723	0.0162532	0.0466632	0.0278982	CSF1R/F2R	2	biological process
GO:0071380	cellular response to prostaglandin E stimulus	2/247	15/18723	0.0162532	0.0466632	0.0278982	PTGER4/TNFSF4	2	biological process
GO:1901741	positive regulation of myoblast fusion	2/247	15/18723	0.0162532	0.0466632	0.0278982	CXCL9/NFATC2	2	biological process
GO:2001028	positive regulation of endothelial cell chemotaxis	2/247	15/18723	0.0162532	0.0466632	0.0278982	TMSB4X/LGMN	2	biological process
GO:2001138	regulation of phospholipid transport	2/247	15/18723	0.0162532	0.0466632	0.0278982	FASLG/CETP	2	biological process
GO:0031668	cellular response to extracellular stimulus	8/247	246/18723	0.0166969	0.047897	0.0286358	IL15/VCAM1/FAS/PTPRC/ICAM1/MAPK1/HMOX1/CBL	8	biological process
GO:0071634	regulation of transforming growth factor beta production	3/247	41/18723	0.016722	0.0479289	0.0286549	XCL1/CX3CL1/TYROBP	3	biological process
GO:0006606	protein import into nucleus	6/247	155/18723	0.0170265	0.0487036	0.0291181	IFNG/JAK2/SYK/TGFB1/MAPK1/STAT3	6	biological process
GO:0034614	cellular response to reactive oxygen species	6/247	155/18723	0.0170265	0.0487036	0.0291181	BTK/MMP9/MAPK1/PRDX2/IL10/IL18RAP	6	biological process
GO:0031623	receptor internalization	5/247	113/18723	0.0170349	0.0487036	0.0291181	SYK/PLCG2/FCER1G/ITGB2/GRB2	5	biological process
GO:0003012	muscle system process	12/247	452/18723	0.0172577	0.0492995	0.0294743	IL15/PIK3CG/ARG2/CXCR4/ADRB2/HAMP/F2R/HMOX1/EDN3/PTAFR/TNFRSF1B/RHOA	12	biological process
GO:0045913	positive regulation of carbohydrate metabolic process	4/247	75/18723	0.017314	0.0494193	0.029546	IFNG/CD244/NFKB1/PTAFR	4	biological process
GO:0051054	positive regulation of DNA metabolic process	7/247	201/18723	0.017526	0.0499827	0.0298828	CD40/PTPRC/CD28/PRKCQ/TGFB1/MAPK1/TNFSF4	7	biological process
GO:0009897	external side of plasma membrane	75/251	421/19550	7.23e-65	1.63e-62	1.29e-62	B2M/CD1A/CD1B/CD1C/CD1D/CD1E/CD4/CD8A/CD74/MR1/MICB/CXCL10/CXCL9/CCR10/CD40/CCR6/IL12B/IL7R/CD40LG/PDCD1/FASLG/VCAM1/CCR7/CCR8/CCR5/CXCR4/CXCR6/CCR4/CD79A/CD79B/CD19/CD22/FCGR2B/CX3CR1/CXCR3/CXCR5/XCR1/EBI3/IL12RB1/IL2RB/IL27RA/IL2RG/IL5RA/IL6R/TNFRSF18/TNFRSF9/CD48/CD244/FAS/CD3D/CD3E/CD3G/PTPRC/CD28/CTLA4/CTSB/FCER1G/ICAM1/RAET1E/TLR4/TLR8/MSR1/CD14/CCR3/CCR1/CD86/CCRL2/CNTFR/CSF2RA/IL12RB2/IL1…	75	cellular component
GO:0098802	plasma membrane signaling receptor complex	28/251	306/19550	3.85e-16	4.35e-14	3.42e-14	B2M/CD4/CD8A/CD40/CD79A/CD79B/SYK/PTPN6/CSF2RB/IL12RB1/IL2RB/IL18R1/IL27RA/IL6R/ITGAL/CD247/ZAP70/CD3D/CD3E/CD3G/TLR2/TLR1/CNTFR/IL13RA1/IL18RAP/IL2RA/OSMR/ITGB2	28	cellular component
GO:0045121	membrane raft	28/251	335/19550	3.93e-15	2.22e-13	1.75e-13	CD1A/CD4/CD8A/FASLG/JAK2/CD79A/BTK/CD19/INPP5D/LCK/ZAP70/LAT/CD48/FAS/PTPRC/ICAM1/TLR2/MAPK1/F2R/TLR1/CD14/HMOX1/HCK/OLR1/TNFRSF1B/ITGB2/LCP2/CBL	28	cellular component
GO:0098857	membrane microdomain	28/251	335/19550	3.93e-15	2.22e-13	1.75e-13	CD1A/CD4/CD8A/FASLG/JAK2/CD79A/BTK/CD19/INPP5D/LCK/ZAP70/LAT/CD48/FAS/PTPRC/ICAM1/TLR2/MAPK1/F2R/TLR1/CD14/HMOX1/HCK/OLR1/TNFRSF1B/ITGB2/LCP2/CBL	28	cellular component
GO:0030139	endocytic vesicle	21/251	336/19550	2.66e-09	1.2e-07	9.48e-08	B2M/CD4/CD74/TLR7/GNLY/IL7R/SYK/RAC2/ADRB2/CD3D/CD3G/CTLA4/CTSL/CTSS/NOD2/TLR2/CYBB/TLR1/MSR1/MARCO/IGF2R	21	cellular component
GO:0031904	endosome lumen	8/251	35/19550	1.15e-08	4.34e-07	3.42e-07	B2M/IL12B/JAK2/PRF1/CTSB/CTSL/CTSS/LGMN	8	cellular component
GO:0036019	endolysosome	7/251	27/19550	3.77e-08	1.22e-06	9.59e-07	TLR3/TLR7/CTSB/CTSL/CTSS/LGMN/TLR8	7	cellular component
GO:0001772	immunological synapse	8/251	44/19550	7.85e-08	2.22e-06	1.75e-06	LCK/ZAP70/LAT/GZMB/CD3E/CD28/PRKCQ/ICAM1	8	cellular component
GO:0030666	endocytic vesicle membrane	14/251	193/19550	2.11e-07	5.3e-06	4.17e-06	B2M/CD4/CD74/IL7R/RAC2/ADRB2/CD3D/CD3G/TLR2/CYBB/TLR1/MSR1/MARCO/IGF2R	14	cellular component
GO:0030667	secretory granule membrane	17/251	311/19550	6.1e-07	1.38e-05	1.08e-05	ITGAL/PTPRC/FCER1G/TLR2/CYBB/CD14/OLR1/LILRB3/C5AR1/PTAFR/C3AR1/IGF2R/TNFRSF1B/ITGB2/TYROBP/FCGR3B/RHOA	17	cellular component
GO:0070820	tertiary granule	12/251	164/19550	1.44e-06	2.96e-05	2.33e-05	B2M/PTPN6/CTSS/FCER1G/CAMP/MMP9/CYBB/CHIT1/OLR1/PTAFR/ITGB2/RHOA	12	cellular component
GO:0044853	plasma membrane raft	10/251	116/19550	2.52e-06	4.75e-05	3.74e-05	CD8A/FASLG/JAK2/MAPK1/F2R/HMOX1/HCK/ITGB2/LCP2/CBL	10	cellular component
GO:0042581	specific granule	11/251	160/19550	7.23e-06	0.000125772	9.9e-05	B2M/PTPN6/ITGAL/CAMP/NFKB1/CYBB/CHIT1/OLR1/C3AR1/TNFRSF1B/ITGB2	11	cellular component
GO:0045335	phagocytic vesicle	10/251	137/19550	1.12e-05	0.000180724	0.000142256	B2M/TLR7/GNLY/SYK/RAC2/CTSS/NOD2/TLR2/CYBB/TLR1	10	cellular component
GO:0005770	late endosome	14/251	282/19550	1.81e-05	0.000273031	0.000214915	CD1E/CD74/MR1/IL12B/CXCR4/CD79A/CTSL/CTSS/LGMN/IFNAR1/MAPK1/F2R/GRN/IGF2R	14	cellular component
GO:0045334	clathrin-coated endocytic vesicle	8/251	91/19550	2.24e-05	0.000316428	0.000249075	CD4/CD74/IL7R/ADRB2/CD3D/CD3G/CTLA4/IGF2R	8	cellular component
GO:0030669	clathrin-coated endocytic vesicle membrane	7/251	72/19550	3.83e-05	0.00050896	0.000400625	CD4/CD74/IL7R/ADRB2/CD3D/CD3G/IGF2R	7	cellular component
GO:0031234	extrinsic component of cytoplasmic side of plasma membrane	8/251	101/19550	4.77e-05	0.000599114	0.00047159	CYLD/PTK2/SYK/LCK/ZAP70/FGR/HCK/RHOA	8	cellular component
GO:1904724	tertiary granule lumen	6/251	55/19550	7.22e-05	0.000859221	0.000676331	B2M/PTPN6/CTSS/CAMP/MMP9/CHIT1	6	cellular component
GO:0060205	cytoplasmic vesicle lumen	14/251	325/19550	8.48e-05	0.000929903	0.000731968	B2M/TMSB4X/FASLG/PTPN6/GMFG/HSPA6/CAMP/TGFB1/NFKB1/MAPK1/CHIT1/GRN/FGR/RNASE2	14	cellular component
GO:0005775	vacuolar lumen	10/251	174/19550	8.7e-05	0.000929903	0.000731968	CD1E/CD74/FASLG/CTSB/CTSL/CTSS/LGMN/MAPK1/GRN/RNASE2	10	cellular component
GO:0031983	vesicle lumen	14/251	327/19550	9.05e-05	0.000929903	0.000731968	B2M/TMSB4X/FASLG/PTPN6/GMFG/HSPA6/CAMP/TGFB1/NFKB1/MAPK1/CHIT1/GRN/FGR/RNASE2	14	cellular component
GO:0005901	caveola	7/251	84/19550	0.000103314	0.00101098	0.000795787	FASLG/JAK2/MAPK1/F2R/HMOX1/HCK/CBL	7	cellular component
GO:0005925	focal adhesion	16/251	418/19550	0.000107361	0.00101098	0.000795787	B2M/JAK2/PTK2/RAC2/IL16/TNFSF13B/PTPRC/ICAM1/NOX4/MAPK1/JAK1/HCK/IGF2R/ITGB2/RHOA/CBL	16	cellular component
GO:0042101	T cell receptor complex	9/251	148/19550	0.000127777	0.00112964	0.000889187	CD4/CD8A/SYK/PTPN6/CD247/ZAP70/CD3D/CD3E/CD3G	9	cellular component
GO:0030055	cell-substrate junction	16/251	425/19550	0.000129958	0.00112964	0.000889187	B2M/JAK2/PTK2/RAC2/IL16/TNFSF13B/PTPRC/ICAM1/NOX4/MAPK1/JAK1/HCK/IGF2R/ITGB2/RHOA/CBL	16	cellular component
GO:0019898	extrinsic component of membrane	13/251	309/19550	0.000191201	0.00160043	0.00125977	SOCS1/CYLD/PIK3CG/PTK2/SYK/PIK3CD/LCK/ZAP70/FGR/HCK/PIK3R5/CNTFR/RHOA	13	cellular component
GO:0043202	lysosomal lumen	7/251	97/19550	0.000254471	0.00205394	0.00161675	CD1E/CD74/FASLG/CTSB/CTSL/CTSS/LGMN	7	cellular component
GO:0034774	secretory granule lumen	13/251	322/19550	0.000285107	0.00222187	0.00174893	B2M/TMSB4X/PTPN6/GMFG/HSPA6/CAMP/TGFB1/NFKB1/MAPK1/CHIT1/GRN/FGR/RNASE2	13	cellular component
GO:0009898	cytoplasmic side of plasma membrane	9/251	172/19550	0.000392486	0.00295673	0.00232738	CYLD/PTK2/SYK/LCK/ZAP70/PTPRC/FGR/HCK/RHOA	9	cellular component
GO:0005942	phosphatidylinositol 3-kinase complex	4/251	28/19550	0.000426192	0.00310707	0.00244572	SOCS1/PIK3CG/PIK3CD/PIK3R5	4	cellular component
GO:0005769	early endosome	14/251	394/19550	0.000605316	0.00427504	0.00336508	B2M/CD1E/CD4/MR1/KIR2DL4/TLR3/VCAM1/CXCR4/CD22/ADRB2/TLR4/MAPK1/F2R/IGF2R	14	cellular component
GO:0101002	ficolin-1-rich granule	9/251	185/19550	0.000665083	0.00455481	0.0035853	GMFG/CTSB/CTSS/FCER1G/HSPA6/MMP9/MAPK1/ITGB2/RHOA	9	cellular component
GO:0030665	clathrin-coated vesicle membrane	7/251	116/19550	0.000751988	0.00499851	0.00393455	CD4/CD74/IL7R/ADRB2/CD3D/CD3G/IGF2R	7	cellular component
GO:0098562	cytoplasmic side of membrane	9/251	197/19550	0.00103842	0.00670524	0.005278	CYLD/PTK2/SYK/LCK/ZAP70/PTPRC/FGR/HCK/RHOA	9	cellular component
GO:0098636	protein complex involved in cell adhesion	4/251	36/19550	0.0011314	0.006912	0.00544074	ITGAL/CD28/CTLA4/ITGB2	4	cellular component
GO:0035579	specific granule membrane	6/251	91/19550	0.00113161	0.006912	0.00544074	ITGAL/CYBB/OLR1/C3AR1/TNFRSF1B/ITGB2	6	cellular component
GO:0035580	specific granule lumen	5/251	62/19550	0.00119511	0.00710776	0.00559484	B2M/PTPN6/CAMP/NFKB1/CHIT1	5	cellular component
GO:0036020	endolysosome membrane	3/251	18/19550	0.00147948	0.00857342	0.00674852	TLR3/TLR7/TLR8	3	cellular component
GO:0019897	extrinsic component of plasma membrane	8/251	174/19550	0.00187894	0.010616	0.00835635	CYLD/PTK2/SYK/LCK/ZAP70/FGR/HCK/RHOA	8	cellular component
GO:0030662	coated vesicle membrane	8/251	181/19550	0.00240232	0.0132421	0.0104234	B2M/CD4/CD74/IL7R/ADRB2/CD3D/CD3G/IGF2R	8	cellular component
GO:0070821	tertiary granule membrane	5/251	73/19550	0.00247531	0.0133195	0.0104844	FCER1G/CYBB/OLR1/PTAFR/ITGB2	5	cellular component
GO:0030670	phagocytic vesicle membrane	5/251	76/19550	0.00295164	0.0155133	0.0122112	B2M/RAC2/TLR2/CYBB/TLR1	5	cellular component
GO:0042611	MHC protein complex	3/251	25/19550	0.00390304	0.0196167	0.0154412	B2M/CD74/MR1	3	cellular component
GO:0030136	clathrin-coated vesicle	8/251	196/19550	0.00390598	0.0196167	0.0154412	CD4/CD74/IL7R/ADRB2/CD3D/CD3G/CTLA4/IGF2R	8	cellular component
GO:1904813	ficolin-1-rich granule lumen	6/251	124/19550	0.00534786	0.0262743	0.0206816	GMFG/CTSB/CTSS/HSPA6/MMP9/MAPK1	6	cellular component
GO:0032009	early phagosome	2/251	12/19550	0.00995457	0.0478667	0.037678	TLR7/SYK	2	cellular component
GO:0140375	immune receptor activity	54/250	144/18368	2.36e-64	8.96e-62	6.37e-62	CD4/CD74/MR1/KIR2DL4/CCR10/CCR6/IL12B/IL7R/CCR7/CCR8/CCR5/CXCR4/CXCR6/CCR4/CR2/FCGR2B/CMKLR1/CX3CR1/CXCR3/CXCR5/XCR1/EBI3/CSF2RB/FLT3/IL10RA/IL12RB1/IL2RB/IL18R1/IL21R/IL22RA2/IL27RA/IL2RG/IL5RA/IL6R/FCER1G/KLRD1/IFNAR1/IFNAR2/CCR3/CCR1/LILRB3/C5AR1/CCRL2/C5AR2/C3AR1/CNTFR/CSF2RA/IL12RB2/IL13RA1/IL17RA/IL18RAP/IL2RA/MPL/OSMR	54	molecular function
GO:0004896	cytokine receptor activity	44/250	97/18368	6.89e-57	1.3e-54	9.28e-55	CD4/CD74/CCR10/CCR6/IL12B/IL7R/CCR7/CCR8/CCR5/CXCR4/CXCR6/CCR4/CMKLR1/CX3CR1/CXCR3/CXCR5/XCR1/EBI3/CSF2RB/FLT3/IL10RA/IL12RB1/IL2RB/IL18R1/IL21R/IL22RA2/IL27RA/IL2RG/IL5RA/IL6R/IFNAR1/IFNAR2/CCR3/CCR1/CCRL2/CNTFR/CSF2RA/IL12RB2/IL13RA1/IL17RA/IL18RAP/IL2RA/MPL/OSMR	44	molecular function
GO:0019955	cytokine binding	38/250	139/18368	4.06e-39	5.13e-37	3.65e-37	CD4/CD74/CCR10/CCR6/IL12B/CCR7/CCR8/CCR5/CXCR4/CXCR6/CCR4/CX3CR1/CXCR3/CXCR5/XCR1/EBI3/CSF1R/IL10RA/IL12RB1/IL2RB/IL18R1/IL22RA2/IL27RA/IL2RG/IL5RA/IL6R/TNFRSF9/IFNAR1/CCR3/CCR1/CCRL2/CNTFR/CSF2RA/IL12RB2/IL13RA1/IL2RA/OSMR/TNFRSF1B	38	molecular function
GO:0005126	cytokine receptor binding	45/250	271/18368	7.15e-36	6.78e-34	4.82e-34	IFNG/LTA/CXCL10/CXCL9/CXCL11/CXCL13/XCL1/STAT1/IL15/CCL5/IL12B/CD40LG/FASLG/CCL19/CCL17/CCL21/JAK2/SYK/CX3CL1/CX3CR1/CSF1/LTB/TNFSF13B/TNFSF8/IL12RB1/IL27RA/IL6R/CCL13/CCL8/TGFB1/STAT3/CCL4/JAK1/TNFSF4/CCL16/CCL18/CCL26/CCL22/CCL23/IL10/CCRL2/TNFSF14/IL13RA1/OSMR/GRB2	45	molecular function
GO:0005125	cytokine activity	41/250	235/18368	1.35e-33	1.03e-31	7.29e-32	IFNG/LTA/CXCL10/CXCL9/CXCL11/CXCL13/XCL1/IL15/CCL5/IL12B/CD40LG/FASLG/CCL19/CCL17/CCL21/CX3CL1/CMTM7/CSF1/EBI3/FLT3LG/IL16/LTB/TNFSF13B/TNFSF8/CCL13/CCL8/TGFB1/GRN/CCL4/TNFSF4/CCL16/CCL18/CCL26/CCL22/CCL23/IL10/BMP8A/CMTM3/INHBA/SECTM1/TNFSF14	41	molecular function
GO:0048018	receptor ligand activity	51/250	487/18368	1.32e-30	8.35e-29	5.93e-29	IFNG/LTA/CXCL10/CXCL9/CXCL11/CXCL13/XCL1/IL15/CCL5/IL12B/CD40LG/FASLG/CCL19/CCL17/CCL21/CX3CL1/SEMA4A/SEMA4D/CMTM7/CSF1/EBI3/FLT3LG/GMFG/IL16/LTB/PNOC/TNFSF13B/TNFSF8/UTS2B/HAMP/CCL13/CCL8/TGFB1/GRN/CCL4/TNFSF4/CCL16/CCL18/CCL26/CCL22/CCL23/IL10/EDN3/TYMP/BMP8A/CMTM3/FGF19/INHBA/NENF/SECTM1/TNFSF14	51	molecular function
GO:0030546	signaling receptor activator activity	51/250	495/18368	2.91e-30	1.57e-28	1.12e-28	IFNG/LTA/CXCL10/CXCL9/CXCL11/CXCL13/XCL1/IL15/CCL5/IL12B/CD40LG/FASLG/CCL19/CCL17/CCL21/CX3CL1/SEMA4A/SEMA4D/CMTM7/CSF1/EBI3/FLT3LG/GMFG/IL16/LTB/PNOC/TNFSF13B/TNFSF8/UTS2B/HAMP/CCL13/CCL8/TGFB1/GRN/CCL4/TNFSF4/CCL16/CCL18/CCL26/CCL22/CCL23/IL10/EDN3/TYMP/BMP8A/CMTM3/FGF19/INHBA/NENF/SECTM1/TNFSF14	51	molecular function
GO:0042379	chemokine receptor binding	23/250	72/18368	9.29e-26	4.4e-24	3.13e-24	CXCL10/CXCL9/CXCL11/CXCL13/XCL1/STAT1/CCL5/CCL19/CCL17/CCL21/CX3CL1/CX3CR1/CCL13/CCL8/STAT3/CCL4/JAK1/CCL16/CCL18/CCL26/CCL22/CCL23/CCRL2	23	molecular function
GO:0001637	G protein-coupled chemoattractant receptor activity	16/250	26/18368	4.03e-24	1.53e-22	1.08e-22	CCR10/CCR6/CCR7/CCR8/CCR5/CXCR4/CXCR6/CCR4/CMKLR1/CX3CR1/CXCR3/CXCR5/XCR1/CCR3/CCR1/CCRL2	16	molecular function
GO:0004950	chemokine receptor activity	16/250	26/18368	4.03e-24	1.53e-22	1.08e-22	CCR10/CCR6/CCR7/CCR8/CCR5/CXCR4/CXCR6/CCR4/CMKLR1/CX3CR1/CXCR3/CXCR5/XCR1/CCR3/CCR1/CCRL2	16	molecular function
GO:0048020	CCR chemokine receptor binding	19/250	48/18368	1.42e-23	4.91e-22	3.49e-22	CXCL13/XCL1/STAT1/CCL5/CCL19/CCL17/CCL21/CX3CL1/CCL13/CCL8/STAT3/CCL4/JAK1/CCL16/CCL18/CCL26/CCL22/CCL23/CCRL2	19	molecular function
GO:0016493	C-C chemokine receptor activity	15/250	23/18368	2.97e-23	9.39e-22	6.68e-22	CCR10/CCR6/CCR7/CCR8/CCR5/CXCR4/CXCR6/CCR4/CX3CR1/CXCR3/CXCR5/XCR1/CCR3/CCR1/CCRL2	15	molecular function
GO:0019957	C-C chemokine binding	15/250	24/18368	7.83e-23	2.28e-21	1.62e-21	CCR10/CCR6/CCR7/CCR8/CCR5/CXCR4/CXCR6/CCR4/CX3CR1/CXCR3/CXCR5/XCR1/CCR3/CCR1/CCRL2	15	molecular function
GO:0008009	chemokine activity	18/250	49/18368	1.1e-21	2.98e-20	2.12e-20	CXCL10/CXCL9/CXCL11/CXCL13/XCL1/CCL5/CCL19/CCL17/CCL21/CX3CL1/CCL13/CCL8/CCL4/CCL16/CCL18/CCL26/CCL22/CCL23	18	molecular function
GO:0019956	chemokine binding	15/250	33/18368	5.57e-20	1.41e-18	1e-18	CCR10/CCR6/CCR7/CCR8/CCR5/CXCR4/CXCR6/CCR4/CX3CR1/CXCR3/CXCR5/XCR1/CCR3/CCR1/CCRL2	15	molecular function
GO:0001664	G protein-coupled receptor binding	29/250	295/18368	7.21e-17	1.71e-15	1.21e-15	CXCL10/CXCL9/CXCL11/CXCL13/XCL1/STAT1/CCL5/CCL19/CCL17/CCL21/JAK2/CX3CL1/CX3CR1/PNOC/UTS2B/S1PR2/CCL13/CCL8/STAT3/CCL4/MARCO/JAK1/CCL16/CCL18/CCL26/CCL22/CCL23/EDN3/CCRL2	29	molecular function
GO:0008528	G protein-coupled peptide receptor activity	20/250	147/18368	1.13e-14	2.51e-13	1.79e-13	CCR10/CCR6/CCR7/CCR8/CCR5/CXCR4/CXCR6/CCR4/CMKLR1/CX3CR1/CXCR3/CXCR5/CYSLTR1/XCR1/S1PR2/TSHR/F2R/CCR3/CCR1/CCRL2	20	molecular function
GO:0001653	peptide receptor activity	20/250	153/18368	2.47e-14	5.19e-13	3.69e-13	CCR10/CCR6/CCR7/CCR8/CCR5/CXCR4/CXCR6/CCR4/CMKLR1/CX3CR1/CXCR3/CXCR5/CYSLTR1/XCR1/S1PR2/TSHR/F2R/CCR3/CCR1/CCRL2	20	molecular function
GO:0071723	lipopeptide binding	8/250	10/18368	4.63e-14	9.23e-13	6.57e-13	CD1A/CD1B/CD1C/CD1D/CD1E/TLR2/TLR1/CD14	8	molecular function
GO:0001784	phosphotyrosine residue binding	11/250	44/18368	1.23e-11	2.33e-10	1.66e-10	SYK/VAV1/PTPN6/PLCG2/LCK/ZAP70/MAPK1/FGR/HCK/GRB2/CBL	11	molecular function
GO:0004715	non-membrane spanning protein tyrosine kinase activity	11/250	45/18368	1.61e-11	2.9e-10	2.06e-10	JAK2/PTK2/TXK/SYK/BTK/LCK/ZAP70/ITK/JAK1/FGR/HCK	11	molecular function
GO:0051219	phosphoprotein binding	13/250	88/18368	1.96e-10	3.37e-09	2.39e-09	SYK/VAV1/PTPN6/PLCG2/LCK/ZAP70/MAPK1/TBK1/FGR/HCK/IGF2R/GRB2/CBL	13	molecular function
GO:0045309	protein phosphorylated amino acid binding	11/250	56/18368	2.07e-10	3.4e-09	2.42e-09	SYK/VAV1/PTPN6/PLCG2/LCK/ZAP70/MAPK1/FGR/HCK/GRB2/CBL	11	molecular function
GO:0005164	tumor necrosis factor receptor binding	9/250	31/18368	2.16e-10	3.4e-09	2.42e-09	LTA/STAT1/CD40LG/FASLG/LTB/TNFSF13B/TNFSF8/TNFSF4/TNFSF14	9	molecular function
GO:0038187	pattern recognition receptor activity	8/250	26/18368	1.33e-09	2.02e-08	1.43e-08	TLR7/TLR4/NOD2/TLR2/TLR8/MARCO/CD14/PTAFR	8	molecular function
GO:0004714	transmembrane receptor protein tyrosine kinase activity	14/250	124/18368	1.5e-09	2.18e-08	1.55e-08	JAK2/PTK2/TXK/SYK/BTK/CSF1R/FLT3/LCK/ZAP70/ITK/JAK1/FGR/HCK/IGF2R	14	molecular function
GO:0003953	NAD+ nucleosidase activity	8/250	28/18368	2.59e-09	3.63e-08	2.58e-08	TLR3/TLR7/IL18R1/TLR4/TLR2/TLR8/TLR1/IL18RAP	8	molecular function
GO:0004713	protein tyrosine kinase activity	14/250	136/18368	5.06e-09	6.85e-08	4.87e-08	JAK2/PTK2/TXK/SYK/BTK/CSF1R/FLT3/LCK/ZAP70/ITK/JAK1/FGR/HCK/IGF2R	14	molecular function
GO:0019199	transmembrane receptor protein kinase activity	14/250	143/18368	9.73e-09	1.27e-07	9.04e-08	JAK2/PTK2/TXK/SYK/BTK/CSF1R/FLT3/LCK/ZAP70/ITK/JAK1/FGR/HCK/IGF2R	14	molecular function
GO:0032813	tumor necrosis factor receptor superfamily binding	9/250	49/18368	1.77e-08	2.24e-07	1.59e-07	LTA/STAT1/CD40LG/FASLG/LTB/TNFSF13B/TNFSF8/TNFSF4/TNFSF14	9	molecular function
GO:0042277	peptide binding	19/250	321/18368	9.19e-08	1.12e-06	7.99e-07	CD1A/CD1B/CD1C/CD1D/CD1E/CD74/FCGR2B/CMKLR1/EBI3/ADRB2/TLR4/NOD2/TLR2/TLR1/MSR1/MARCO/CD14/INHBA/ITGB2	19	molecular function
GO:0015026	coreceptor activity	8/250	48/18368	2.48e-07	2.94e-06	2.09e-06	CD4/CD8A/CCR8/CCR5/CXCR4/CXCR6/CD28/CD86	8	molecular function
GO:0004875	complement receptor activity	5/250	12/18368	3.29e-07	3.78e-06	2.68e-06	CR2/CMKLR1/C5AR1/C5AR2/C3AR1	5	molecular function
GO:0016799	hydrolase activity, hydrolyzing N-glycosyl compounds	8/250	50/18368	3.45e-07	3.85e-06	2.73e-06	TLR3/TLR7/IL18R1/TLR4/TLR2/TLR8/TLR1/IL18RAP	8	molecular function
GO:0050135	NAD(P)+ nucleosidase activity	5/250	16/18368	1.73e-06	1.83e-05	1.3e-05	IL18R1/TLR4/TLR2/TLR1/IL18RAP	5	molecular function
GO:0061809	NAD+ nucleotidase, cyclic ADP-ribose generating	5/250	16/18368	1.73e-06	1.83e-05	1.3e-05	IL18R1/TLR4/TLR2/TLR1/IL18RAP	5	molecular function
GO:0033218	amide binding	19/250	400/18368	2.58e-06	2.64e-05	1.88e-05	CD1A/CD1B/CD1C/CD1D/CD1E/CD74/FCGR2B/CMKLR1/EBI3/ADRB2/TLR4/NOD2/TLR2/TLR1/MSR1/MARCO/CD14/INHBA/ITGB2	19	molecular function
GO:0045236	CXCR chemokine receptor binding	5/250	18/18368	3.33e-06	3.32e-05	2.36e-05	CXCL10/CXCL9/CXCL11/CXCL13/CX3CL1	5	molecular function
GO:0005031	tumor necrosis factor-activated receptor activity	4/250	10/18368	6.6e-06	6.41e-05	4.56e-05	TNFRSF18/FAS/TNFRSF1B/TNFRSF4	4	molecular function
GO:0023023	MHC protein complex binding	6/250	36/18368	8.28e-06	7.85e-05	5.58e-05	B2M/CD4/CD8A/CD74/TAPBPL/KLRD1	6	molecular function
GO:0042608	T cell receptor binding	4/250	11/18368	1.03e-05	9.48e-05	6.74e-05	MR1/LCK/CD3E/CD3G	4	molecular function
GO:0008083	growth factor activity	11/250	162/18368	1.4e-05	0.000125999	8.96e-05	IL12B/CSF1/GMFG/TGFB1/GRN/IL10/TYMP/BMP8A/FGF19/INHBA/NENF	11	molecular function
GO:0001540	amyloid-beta binding	8/250	84/18368	1.88e-05	0.00016586	0.000117928	CD74/FCGR2B/ADRB2/TLR4/TLR2/MSR1/MARCO/ITGB2	8	molecular function
GO:0005035	death receptor activity	4/250	13/18368	2.17e-05	0.00018734	0.000133201	TNFRSF18/FAS/TNFRSF1B/TNFRSF4	4	molecular function
GO:0016004	phospholipase activator activity	4/250	16/18368	5.36e-05	0.000451498	0.000321021	CCL5/BTK/LCK/CCL8	4	molecular function
GO:0001530	lipopolysaccharide binding	5/250	33/18368	7.8e-05	0.000630649	0.000448399	CAMP/TLR4/TLR2/CD14/PTAFR	5	molecular function
GO:0001618	virus receptor activity	7/250	76/18368	7.82e-05	0.000630649	0.000448399	CD4/CCR5/CXCR4/CR2/ICAM1/CD86/TNFRSF4	7	molecular function
GO:0019902	phosphatase binding	11/250	196/18368	8.05e-05	0.000635806	0.000452066	STAT1/PTK2/SYK/NFATC2/CD22/LCK/MAPK1/STAT3/JAK1/TBK1/GRB2	11	molecular function
GO:0140272	exogenous protein binding	7/250	77/18368	8.5e-05	0.000657774	0.000467686	CD4/CCR5/CXCR4/CR2/ICAM1/CD86/TNFRSF4	7	molecular function
GO:0060229	lipase activator activity	4/250	18/18368	8.82e-05	0.000668712	0.000475462	CCL5/BTK/LCK/CCL8	4	molecular function
GO:0003823	antigen binding	10/250	171/18368	0.000120932	0.000898693	0.000638982	CD1A/CD1B/CD1C/CD1D/CD1E/CD40/IL7R/CD48/KLRD1/TGFB1	10	molecular function
GO:0019838	growth factor binding	9/250	141/18368	0.000136432	0.000975621	0.000693678	CXCL13/FLT3/IL10RA/IL2RB/IL2RG/IL6R/IGF2R/IL2RA/OSMR	9	molecular function
GO:0070851	growth factor receptor binding	9/250	141/18368	0.000136432	0.000975621	0.000693678	IL12B/JAK2/IL12RB1/IL27RA/IL6R/IL10/FGF19/GRB2/CBL	9	molecular function
GO:0016798	hydrolase activity, acting on glycosyl bonds	9/250	144/18368	0.000160072	0.00112346	0.000798798	TLR3/TLR7/IL18R1/TLR4/TLR2/CHIT1/TLR8/TLR1/IL18RAP	9	molecular function
GO:0042169	SH2 domain binding	5/250	40/18368	0.000200104	0.00135428	0.000962907	JAK2/PTK2/SYK/PTPN6/LCK	5	molecular function
GO:0042287	MHC protein binding	5/250	40/18368	0.000200104	0.00135428	0.000962907	CD4/CD8A/CD74/CD244/KLRD1	5	molecular function
GO:0019865	immunoglobulin binding	4/250	23/18368	0.000241989	0.00160902	0.00114403	CD22/FCGR2B/FCER1G/FCGR3B	4	molecular function
GO:0047844	deoxycytidine deaminase activity	3/250	10/18368	0.000278545	0.00182015	0.00129415	APOBEC3G/APOBEC3F/APOBEC3C	3	molecular function
GO:0019864	IgG binding	3/250	11/18368	0.000379154	0.00243558	0.00173173	FCGR2B/FCER1G/FCGR3B	3	molecular function
GO:0004435	phosphatidylinositol phospholipase C activity	4/250	26/18368	0.000395666	0.00249929	0.00177703	CCL5/CCR5/PLCG2/CCR1	4	molecular function
GO:0004126	cytidine deaminase activity	3/250	12/18368	0.000500465	0.00305929	0.0021752	APOBEC3G/APOBEC3F/APOBEC3C	3	molecular function
GO:0035325	Toll-like receptor binding	3/250	12/18368	0.000500465	0.00305929	0.0021752	SYK/TLR2/TLR1	3	molecular function
GO:0004629	phospholipase C activity	4/250	28/18368	0.000530447	0.00314124	0.00223346	CCL5/CCR5/PLCG2/CCR1	4	molecular function
GO:0046875	ephrin receptor binding	4/250	28/18368	0.000530447	0.00314124	0.00223346	PIK3CG/GRB2/NCK1/CBL	4	molecular function
GO:1990782	protein tyrosine kinase binding	7/250	105/18368	0.000583387	0.00340159	0.00241858	CD4/PLCG2/FLT3LG/CD247/NOX4/NCK1/CBL	7	molecular function
GO:0005178	integrin binding	8/250	144/18368	0.000807775	0.00463859	0.00329809	CD40LG/VCAM1/PTK2/SYK/CX3CL1/S1PR2/ICAM1/ITGB2	8	molecular function
GO:0004953	icosanoid receptor activity	3/250	15/18368	0.00100424	0.00568072	0.00403906	CYSLTR1/PTGER4/PTGDR	3	molecular function
GO:0019903	protein phosphatase binding	8/250	150/18368	0.00105302	0.00586902	0.00417294	STAT1/PTK2/CD22/LCK/STAT3/JAK1/TBK1/GRB2	8	molecular function
GO:0043548	phosphatidylinositol 3-kinase binding	4/250	34/18368	0.00112707	0.00619071	0.00440167	JAK2/LCK/HCST/CBL	4	molecular function
GO:0043394	proteoglycan binding	4/250	36/18368	0.00140143	0.00758775	0.00539499	PTPRC/CTSB/CTSL/CTSS	4	molecular function
GO:0042056	chemoattractant activity	4/250	37/18368	0.00155469	0.00829899	0.00590068	CXCL10/CCL5/CX3CL1/CCL16	4	molecular function
GO:0001848	complement binding	3/250	21/18368	0.00276382	0.0145485	0.0103441	CR2/C5AR1/ITGB2	3	molecular function
GO:0043274	phospholipase binding	3/250	24/18368	0.00408154	0.0211905	0.0150667	SYK/BTK/LCK	3	molecular function
GO:0030159	signaling receptor complex adaptor activity	4/250	50/18368	0.00472378	0.0241934	0.0172018	LAT/CD3E/CD3G/NCK1	4	molecular function
GO:0035591	signaling adaptor activity	5/250	81/18368	0.00496397	0.0250846	0.0178355	LAT/CD3E/CD3G/STAT3/NCK1	5	molecular function
GO:0023026	MHC class II protein complex binding	3/250	27/18368	0.00572429	0.0285461	0.0202966	B2M/CD4/CD74	3	molecular function
GO:0008081	phosphoric diester hydrolase activity	5/250	89/18368	0.00736988	0.0361501	0.0257031	CCL5/CCR5/PLCG2/HMOX1/CCR1	5	molecular function
GO:0004955	prostaglandin receptor activity	2/250	10/18368	0.007726	0.0361501	0.0257031	PTGER4/PTGDR	2	molecular function
GO:0016175	superoxide-generating NAD(P)H oxidase activity	2/250	10/18368	0.007726	0.0361501	0.0257031	NOX4/CYBB	2	molecular function
GO:0016303	1-phosphatidylinositol-3-kinase activity	2/250	10/18368	0.007726	0.0361501	0.0257031	PIK3CG/PIK3CD	2	molecular function
GO:0052813	phosphatidylinositol bisphosphate kinase activity	2/250	10/18368	0.007726	0.0361501	0.0257031	PIK3CG/PIK3CD	2	molecular function
GO:0004954	prostanoid receptor activity	2/250	11/18368	0.00935864	0.042734	0.0303844	PTGER4/PTGDR	2	molecular function
GO:0043560	insulin receptor substrate binding	2/250	11/18368	0.00935864	0.042734	0.0303844	JAK2/GRB2	2	molecular function
GO:0019239	deaminase activity	3/250	33/18368	0.0100581	0.045381	0.0322665	APOBEC3G/APOBEC3F/APOBEC3C	3	molecular function
GO:0035004	phosphatidylinositol 3-kinase activity	2/250	12/18368	0.0111303	0.0496279	0.0352861	PIK3CG/PIK3CD	2	molecular function
hsa04060	Cytokine-cytokine receptor interaction	82/231	295/8142	7.54e-62	1.6e-59	9.52e-60	920/3458/4049/3627/4283/6373/10563/6375/2826/3600/958/6352/1235/3593/3575/959/356/6363/6361/1236/1237/6366/1234/7852/10663/1233/6376/1524/2833/643/2829/1435/10148/3603/4050/10673/944/1436/1439/3587/3594/3560/8809/50615/9466/3561/3568/3570/23495/608/8784/3604/355/6357/6355/3454/7040/6351/3455/7292/6360/6362/10344/6367/1232/6368/1230/3586/353500/3624/8740/1271/1438/3595/3597/23765/8807/3559/4352/91…	82	KEGG pathway
hsa04061	Viral protein interaction with cytokine and cytokine receptor	44/231	100/8142	1.63e-42	1.73e-40	1.03e-40	4049/3627/4283/6373/10563/6375/2826/6352/1235/6363/6361/1236/1237/6366/1234/7852/1233/6376/1524/2833/643/2829/1435/1436/3587/3560/8809/3561/3570/6357/6355/6351/6360/6362/10344/6367/1232/6368/1230/3586/8740/8807/3559/7133	44	KEGG pathway
hsa04062	Chemokine signaling pathway	49/231	192/8142	4.51e-34	3.19e-32	1.9e-32	3627/4283/6373/10563/6375/2826/6772/6352/1235/5294/6363/6361/1236/1237/6366/1234/7852/10663/1233/3717/5747/7409/5880/5293/5336/6376/1524/2833/643/2829/3702/6357/6355/4790/5594/6774/6351/6360/6362/10344/6367/1232/6368/1230/2268/3055/23533/2885/387	49	KEGG pathway
hsa04650	Natural killer cell mediated cytotoxicity	40/231	131/8142	3.63e-31	1.93e-29	1.15e-29	3458/3823/4277/115653/356/6850/7409/5880/4773/5293/5777/5336/3683/3932/9437/259197/919/7535/27040/10870/962/51744/117157/4068/355/3002/5551/2207/3383/3824/135250/3454/5594/3455/5533/3689/7305/2215/3937/2885	40	KEGG pathway
hsa04660	T cell receptor signaling pathway	33/231	104/8142	2.15e-26	9.12e-25	5.44e-25	920/925/3458/959/5133/7409/4773/5293/5777/3932/919/7535/27040/915/916/917/5788/3702/9402/940/29851/1493/10125/5588/4790/5594/3586/5533/10892/3937/2885/4690/387	33	KEGG pathway
hsa05235	PD-L1 expression and PD-1 checkpoint pathway in cancer	25/231	89/8142	9.73e-19	2.85e-17	1.7e-17	920/3458/6772/5133/3717/4773/5293/5777/3932/919/7535/27040/915/916/917/940/10125/5588/7099/4790/7097/5594/6774/3716/5533	25	KEGG pathway
hsa04659	Th17 cell differentiation	27/231	108/8142	1.04e-18	2.85e-17	1.7e-17	920/3458/6772/3717/4773/10148/3594/3560/50615/9466/3561/3570/3932/919/7535/27040/915/916/917/5588/7040/4790/5594/6774/3716/5533/3559	27	KEGG pathway
hsa04630	JAK-STAT signaling pathway	32/231	162/8142	1.07e-18	2.85e-17	1.7e-17	3458/6772/8651/3600/3593/3575/3717/5293/5777/1439/3587/3594/3560/50615/116379/9466/3561/3568/3570/3454/6774/3716/3455/3586/1271/1438/3595/3597/3559/4352/9180/2885	32	KEGG pathway
hsa04662	B cell receptor signaling pathway	23/231	82/8142	2.64e-17	6.23e-16	3.71e-16	973/974/6850/695/7409/5880/4773/930/1380/5293/3635/933/971/5777/2213/25780/5336/4790/5594/5533/10892/11025/2885	23	KEGG pathway
hsa05340	Primary immunodeficiency	17/231	38/8142	4.72e-17	1e-15	5.96e-16	920/925/4261/958/3575/959/973/695/930/3561/23495/3932/7535/915/916/5788/29851	17	KEGG pathway
hsa04064	NF-kappa B signaling pathway	25/231	104/8142	5.93e-17	1.14e-15	6.81e-16	4049/958/1540/959/7412/6363/6366/6850/695/5336/4050/10673/3932/7535/27040/5588/3383/5971/6357/7099/4790/6351/929/10892/8740	25	KEGG pathway
hsa04658	Th1 and Th2 cell differentiation	23/231	92/8142	4.37e-16	7.71e-15	4.6e-15	920/3458/6772/3593/3717/4773/3594/3560/3561/3932/919/7535/27040/915/916/917/5588/4790/5594/3716/5533/3595/3559	23	KEGG pathway
hsa04380	Osteoclast differentiation	26/231	128/8142	1.15e-15	1.87e-14	1.11e-14	3458/6772/8651/1540/6850/695/4773/5293/2213/5336/1435/1436/3932/5971/3454/7040/4790/5594/3716/3455/5533/11025/7305/2215/3937/2885	26	KEGG pathway
hsa04640	Hematopoietic cell lineage	23/231	99/8142	2.5e-15	3.78e-14	2.25e-14	909/910/911/912/913/920/925/3575/930/1380/933/1435/2323/1436/2322/3568/3570/915/916/917/929/1438/3559	23	KEGG pathway
hsa04620	Toll-like receptor signaling pathway	23/231	104/8142	7.91e-15	1.12e-13	6.66e-14	3627/4283/6373/7098/6772/958/51284/6352/3663/3593/5293/3454/7099/4790/7097/5594/51311/7096/6351/3455/929/29110/942	23	KEGG pathway
hsa05152	Tuberculosis	27/231	180/8142	7.62e-13	1.01e-11	6.02e-12	972/3458/4261/6772/3593/3717/6850/2213/3587/1520/2207/820/7040/7099/4790/64127/7097/5594/7096/3716/929/3586/5533/10892/3689/2215/387	27	KEGG pathway
hsa05145	Toxoplasmosis	21/231	112/8142	3.8e-12	4.74e-11	2.83e-11	3458/4261/6772/8651/958/3593/959/5294/1234/3717/3587/3310/7040/7099/4790/7097/5594/6774/3716/3586/23533	21	KEGG pathway
hsa05167	Kaposi sarcoma-associated herpesvirus infection	27/231	194/8142	4.75e-12	5.6e-11	3.34e-11	4277/7098/6772/5294/1237/1234/1233/3717/6850/4773/5293/5336/355/3383/3454/4790/5594/6774/3716/3455/29110/1232/1230/942/3055/5533/23533	27	KEGG pathway
hsa05162	Measles	23/231	139/8142	5.25e-12	5.86e-11	3.49e-11	6772/51284/3593/356/5293/2213/3560/3561/355/915/916/917/940/3310/3454/7099/4790/7097/6774/3716/3455/29110/3559	23	KEGG pathway
hsa05321	Inflammatory bowel disease	16/231	65/8142	1.98e-11	2.1e-10	1.25e-10	3458/6772/3593/3594/8809/50615/3561/7040/7099/4790/64127/7097/6774/3586/3595/8807	16	KEGG pathway
hsa05417	Lipid and atherosclerosis	27/231	215/8142	5.48e-11	5.54e-10	3.3e-10	958/6352/3593/959/356/7412/3717/5747/7409/4773/5293/355/3310/3383/4318/7099/4790/7097/5594/1536/6774/929/10010/29110/4973/5533/387	27	KEGG pathway
hsa04612	Antigen processing and presentation	16/231	78/8142	3.78e-10	3.64e-09	2.17e-09	567/920/925/972/3458/3805/3823/4261/8302/115653/1508/1514/1520/3310/3824/5641	16	KEGG pathway
hsa05169	Epstein-Barr virus infection	25/231	202/8142	4.08e-10	3.76e-09	2.24e-09	567/3627/6772/958/6850/695/930/1380/5293/5336/3683/919/355/915/916/917/3383/5971/3454/4790/7097/6774/3716/3455/29110	25	KEGG pathway
hsa04625	C-type lectin receptor signaling pathway	18/231	104/8142	5.57e-10	4.92e-09	2.93e-09	6772/3659/1540/3593/6361/6850/4773/5293/5336/2207/5971/4790/5594/6367/3586/5533/10892/387	18	KEGG pathway
hsa04672	Intestinal immune network for IgA production	13/231	49/8142	5.85e-10	4.96e-09	2.96e-09	2826/3600/958/959/7852/10673/23495/608/940/29851/7040/3586/942	13	KEGG pathway
hsa05170	Human immunodeficiency virus 1 infection	25/231	212/8142	1.15e-09	9.36e-09	5.58e-09	567/920/60489/200316/27350/356/1234/7852/5747/5880/4773/5293/5336/919/355/915/916/917/7099/4790/7097/5594/29110/5533/7133	25	KEGG pathway
hsa05140	Leishmaniasis	15/231	77/8142	2.92e-09	2.29e-08	1.37e-08	3458/6772/3593/3717/5777/7040/7099/4790/7097/5594/1536/3716/3586/3689/2215	15	KEGG pathway
hsa05146	Amoebiasis	17/231	102/8142	3.13e-09	2.37e-08	1.41e-08	909/910/911/912/913/3458/3593/384/5747/5293/7040/7099/4790/7097/929/3586/3689	17	KEGG pathway
hsa05163	Human cytomegalovirus infection	25/231	225/8142	4.01e-09	2.93e-08	1.75e-08	567/6352/356/1234/7852/5747/5880/4773/5293/6376/3587/3570/5734/355/4790/5594/6774/6351/3716/29110/1232/1230/5533/2885/387	25	KEGG pathway
hsa05330	Allograft rejection	11/231	38/8142	4.63e-09	3.27e-08	1.95e-08	3458/958/3593/959/356/355/3002/5551/940/3586/942	11	KEGG pathway
hsa05323	Rheumatoid arthritis	16/231	93/8142	5.73e-09	3.92e-08	2.34e-08	3458/3600/6352/1435/4050/10673/3683/940/1493/1514/3383/7040/7099/7097/942/3689	16	KEGG pathway
hsa04668	TNF signaling pathway	17/231	112/8142	1.36e-08	9.01e-08	5.37e-08	4049/3627/3659/3600/6352/7412/5293/6376/1435/8809/355/3383/4318/4790/64127/5594/7133	17	KEGG pathway
hsa05142	Chagas disease	16/231	102/8142	2.28e-08	1.46e-07	8.71e-08	3458/6352/3593/356/5293/919/355/915/916/917/7040/7099/4790/7097/5594/3586	16	KEGG pathway
hsa05166	Human T-cell leukemia virus 1 infection	23/231	222/8142	6.55e-08	4.02e-07	2.4e-07	567/920/4049/3600/958/4773/5293/3560/3561/3683/3932/915/916/917/3383/5971/7040/4790/5594/3716/5533/3559/3689	23	KEGG pathway
hsa05164	Influenza A	20/231	171/8142	6.64e-08	4.02e-07	2.4e-07	3458/4261/3627/7098/6772/51284/6352/3593/356/3717/5293/355/3383/3454/7099/4790/5594/3716/3455/29110	20	KEGG pathway
hsa05144	Malaria	11/231	50/8142	1.06e-07	6.27e-07	3.74e-07	3458/958/959/7412/3683/3383/7040/7099/7097/3586/3689	11	KEGG pathway
hsa05320	Autoimmune thyroid disease	11/231	53/8142	2.02e-07	1.15e-06	6.88e-07	958/959/356/7253/355/3002/5551/940/1493/3586/942	11	KEGG pathway
hsa05135	Yersinia infection	17/231	137/8142	2.84e-07	1.58e-06	9.43e-07	920/925/5747/7409/5880/4773/5293/3932/7535/27040/7099/4790/5594/29110/3586/3937/387	17	KEGG pathway
hsa04664	Fc epsilon RI signaling pathway	12/231	68/8142	3.65e-07	1.99e-06	1.18e-06	6850/695/7409/5880/5293/3635/5336/27040/2207/5594/3937/2885	12	KEGG pathway
hsa05171	Coronavirus disease - COVID-19	22/231	232/8142	6.06e-07	3.21e-06	1.91e-06	3627/7098/6772/51284/3593/6850/5293/5336/3570/3454/7099/4790/7097/5594/1536/6774/51311/3716/3455/29110/728/719	22	KEGG pathway
hsa05161	Hepatitis B	18/231	162/8142	6.71e-07	3.42e-06	2.04e-06	7098/6772/356/3717/4773/5293/355/3454/7040/4318/7099/4790/7097/5594/6774/3716/29110/2885	18	KEGG pathway
hsa04670	Leukocyte transendothelial migration	15/231	114/8142	6.78e-07	3.42e-06	2.04e-06	7412/7852/5747/7294/7409/5880/5293/5336/3683/3702/3383/4318/1536/3689/387	15	KEGG pathway
hsa04151	PI3K-Akt signaling pathway	28/231	354/8142	7.28e-07	3.59e-06	2.14e-06	3575/5294/356/3717/5747/6850/930/5293/1435/2323/1436/2322/3560/3561/3570/3454/7099/4790/7097/5594/2149/3716/3455/23533/9965/3559/9180/2885	28	KEGG pathway
hsa05332	Graft-versus-host disease	9/231	42/8142	2.01e-06	9.68e-06	5.77e-06	3458/115653/356/355/3002/5551/940/3824/942	9	KEGG pathway
hsa04940	Type I diabetes mellitus	9/231	43/8142	2.48e-06	1.17e-05	6.96e-06	3458/4049/3593/356/355/3002/5551/940/942	9	KEGG pathway
hsa05205	Proteoglycans in cancer	19/231	205/8142	5.15e-06	2.37e-05	1.41e-05	3593/356/5747/7409/5293/5777/5336/2099/355/1514/7040/4318/7099/7097/5594/6774/2885/387/867	19	KEGG pathway
hsa05143	African trypanosomiasis	8/231	37/8142	7.05e-06	3.18e-05	1.89e-05	3458/3620/3593/356/7412/355/3383/3586	8	KEGG pathway
hsa04666	Fc gamma R-mediated phagocytosis	12/231	97/8142	1.73e-05	7.63e-05	4.55e-05	6850/7409/5880/5293/3635/2213/5336/27040/5788/5594/3055/2215	12	KEGG pathway
hsa04514	Cell adhesion molecules	15/231	149/8142	1.97e-05	8.51e-05	5.07e-05	920/925/958/959/5133/7412/933/3683/5788/940/29851/1493/3383/942/3689	15	KEGG pathway
hsa04933	AGE-RAGE signaling pathway in diabetic complications	12/231	100/8142	2.36e-05	0.00010015	5.97e-05	6772/7412/3717/5293/5336/3383/7040/4790/50507/5594/1536/6774	12	KEGG pathway
hsa04917	Prolactin signaling pathway	10/231	70/8142	2.48e-05	0.000103051	6.14e-05	6772/8651/3659/3717/5293/2099/4790/5594/6774/2885	10	KEGG pathway
hsa05160	Hepatitis C	15/231	157/8142	3.66e-05	0.000149171	8.89e-05	3458/3627/7098/6772/356/5293/355/3454/4790/5594/6774/3716/3455/29110/2885	15	KEGG pathway
hsa05416	Viral myocarditis	9/231	60/8142	4.27e-05	0.000170797	0.000101766	958/959/5880/3683/5551/940/3383/942/3689	9	KEGG pathway
hsa04621	NOD-like receptor signaling pathway	16/231	184/8142	6.38e-05	0.000250626	0.00014933	6772/6352/2634/1508/820/3454/7099/4790/64127/5594/1536/3716/3455/10010/29110/387	16	KEGG pathway
hsa04613	Neutrophil extracellular trap formation	16/231	190/8142	9.37e-05	0.000361239	0.000215237	51284/6850/5880/5293/5336/3683/820/7099/4790/7097/5594/1536/51311/728/3689/2215	16	KEGG pathway
hsa04014	Ras signaling pathway	18/231	232/8142	9.96e-05	0.000377007	0.000224632	356/5880/5293/25780/5336/1435/2323/1436/2322/7535/27040/10125/4790/5594/29110/9965/2885/387	18	KEGG pathway
hsa04611	Platelet activation	12/231	124/8142	0.000196505	0.00073086	0.000435467	5294/6850/695/5293/5336/10125/2207/5594/2149/23533/3937/387	12	KEGG pathway
hsa05133	Pertussis	9/231	76/8142	0.000277552	0.0010145	0.000604468	3659/3593/7099/4790/5594/929/3586/3689/387	9	KEGG pathway
hsa05150	Staphylococcus aureus infection	10/231	96/8142	0.000370176	0.00133012	0.000792527	2213/3683/3383/820/3586/728/5724/719/3689/2215	10	KEGG pathway
hsa04217	Necroptosis	13/231	159/8142	0.00056649	0.00198995	0.00118567	3458/7098/6772/1540/356/3717/355/3454/7099/1536/6774/3716/3455	13	KEGG pathway
hsa05221	Acute myeloid leukemia	8/231	67/8142	0.000572581	0.00198995	0.00118567	5293/1436/2322/4790/5594/6774/929/2885	8	KEGG pathway
hsa04066	HIF-1 signaling pathway	10/231	109/8142	0.0010151	0.00347099	0.00206811	3458/5293/5336/3570/7099/4790/5594/1536/6774/3162	10	KEGG pathway
hsa05134	Legionellosis	7/231	57/8142	0.00106711	0.00359093	0.00213958	3593/3310/7099/4790/7097/929/3689	7	KEGG pathway
hsa04145	Phagosome	12/231	152/8142	0.00124872	0.00413637	0.00246457	2213/1514/1520/7099/7097/1536/4481/8685/929/4973/3689/2215	12	KEGG pathway
hsa04370	VEGF signaling pathway	7/231	59/8142	0.00131249	0.00427344	0.00254624	5747/5880/4773/5293/5336/5594/5533	7	KEGG pathway
hsa05212	Pancreatic cancer	8/231	76/8142	0.00133041	0.00427344	0.00254624	6772/5880/5293/7040/4790/5594/6774/3716	8	KEGG pathway
hsa04210	Apoptosis	11/231	136/8142	0.00162897	0.00515435	0.00307111	356/5293/1439/355/3002/5551/1508/1514/1520/4790/5594	11	KEGG pathway
hsa04010	MAPK signaling pathway	18/231	294/8142	0.00171123	0.00525906	0.0031335	356/5880/25780/1435/2323/1436/2322/355/10125/3310/5971/7040/4790/5594/929/5533/9965/2885	18	KEGG pathway
hsa01521	EGFR tyrosine kinase inhibitor resistance	8/231	79/8142	0.00171167	0.00525906	0.0031335	3717/5293/5336/3570/5594/6774/3716/2885	8	KEGG pathway
hsa05418	Fluid shear stress and atherosclerosis	11/231	139/8142	0.00194046	0.00587683	0.00350159	3458/7412/5747/5880/5293/1514/3383/4318/4790/3162/387	11	KEGG pathway
hsa04360	Axon guidance	13/231	182/8142	0.0019716	0.00588704	0.00350767	7852/5747/5880/4773/5293/5336/64218/10507/5594/5533/10154/4690/387	13	KEGG pathway
hsa04936	Alcoholic liver disease	11/231	142/8142	0.00229888	0.00676894	0.00403313	3593/356/355/7099/4790/50507/929/29110/728/719/23765	11	KEGG pathway
hsa04015	Rap1 signaling pathway	14/231	210/8142	0.00255324	0.00741487	0.004418	7409/5880/5293/25780/1435/1436/3683/27040/5594/2149/9965/3689/3937/387	14	KEGG pathway
hsa04657	IL-17 signaling pathway	8/231	94/8142	0.00508328	0.0145629	0.00867701	3458/3627/6361/4318/4790/5594/29110/23765	8	KEGG pathway
hsa04935	Growth hormone synthesis, secretion and action	9/231	119/8142	0.00658983	0.0186273	0.0110987	6772/8651/3717/5747/5293/5336/5594/6774/2885	9	KEGG pathway
hsa03250	Viral life cycle - HIV-1	6/231	63/8142	0.0086199	0.024045	0.0143267	920/60489/200316/27350/1234/7852	6	KEGG pathway
hsa04072	Phospholipase D signaling pathway	10/231	148/8142	0.00931083	0.025635	0.0152741	5294/6850/5293/5336/2207/5594/2149/23533/2885/387	10	KEGG pathway
hsa04012	ErbB signaling pathway	7/231	85/8142	0.010219	0.0277748	0.016549	5747/5293/5336/5594/2885/4690/867	7	KEGG pathway
hsa05310	Asthma	4/231	31/8142	0.0108845	0.0292091	0.0174036	958/959/2207/3586	4	KEGG pathway
hsa05203	Viral carcinogenesis	12/231	204/8142	0.0132061	0.0349963	0.0208518	1237/1234/1233/6850/5293/4790/5594/6774/3716/1232/2885/387	12	KEGG pathway
hsa04622	RIG-I-like receptor signaling pathway	6/231	70/8142	0.0141317	0.0369867	0.0220378	3627/1540/3593/4790/10010/29110	6	KEGG pathway
hsa04350	TGF-beta signaling pathway	7/231	94/8142	0.0171303	0.0442882	0.0263882	3458/57817/7040/5594/353500/3624/387	7	KEGG pathway

## Sheet: Supplement Table S2
Supplement Table S2: Hallmark pathways enriched in the high-risk groups based on GSEA.
ID	Description	setSize	enrichmentScore	NES	pvalue	p.adjust	qvalues	rank	leading_edge	core_enrichment
hsa05144	Malaria	45	0.793845	2.3046	1e-10	5.56667e-09	3.05263e-09	1712	tags=62%, list=11%, signal=56%	7058/7060/6401/1311/6347/7057/3569/6383/948/7412/7099/3689/2532/7097/2995/7040/3082/3383/6403/7059/3606/7043/7042/3683/975/3458/3586/4035
hsa00532	Glycosaminoglycan biosynthesis - chondroitin sulfate / dermatan sulfate	19	0.77255	1.88415	5.74683e-05	0.000505116	0.000276994	3205	tags=79%, list=20%, signal=63%	337876/56548/50515/55454/51363/22856/9469/113189/10090/55501/29940/126792/79586/54480/64131
hsa00604	Glycosphingolipid biosynthesis - ganglio series	14	0.725481	1.65802	0.0090736	0.0269741	0.014792	2735	tags=57%, list=17%, signal=47%	81849/6482/30815/256435/6489/8869/3074/6483
hsa04512	ECM-receptor interaction	85	0.700326	2.22585	1e-10	5.56667e-09	3.05263e-09	1554	tags=40%, list=10%, signal=36%	7058/7060/1311/1277/1292/7057/3908/3371/2335/1278/6696/1293/948/1284/1282/3912/3676/3693/3915/3913/3678/3679/3339/3672/3685/1291/3910/7059/960/7450/63923/1286/3688/9900
hsa05322	Systemic lupus erythematosus	45	0.690452	2.00444	4.92404e-06	6.48065e-05	3.55384e-05	2028	tags=40%, list=13%, signal=35%	716/715/730/713/712/714/2212/3119/718/2215/942/87/3113/3458/3586/3115/3109/3122
hsa04610	Complement and coagulation cascades	79	0.682621	2.14287	3.54146e-09	1.31427e-07	7.20718e-08	1876	tags=47%, list=12%, signal=42%	716/710/715/728/719/730/713/11326/5054/3684/712/714/5328/3075/3689/718/2162/2151/1675/7056/5627/3426/5055/2149/5327/2/623/7035/7450/10544/3687/1191/624/2157/2244/966/5329
hsa04145	Phagosome	135	0.648056	2.16364	1e-10	5.56667e-09	3.05263e-09	2304	tags=35%, list=15%, signal=30%	7058/7060/4973/1311/81035/715/7057/2213/929/4360/3684/2212/948/84617/4688/4481/7099/3689/3119/718/2215/64581/7846/1514/7097/3693/9902/3678/3685/4689/7059/1781/3113/347733/1536/8685/3688/526/3115/11151/653361/3109/3122/1780/22925/8411/3916
hsa05146	Amoebiasis	99	0.64662	2.08668	2.14473e-09	1.01787e-07	5.58177e-08	1994	tags=40%, list=13%, signal=36%	1277/3908/2335/1278/1281/929/3684/3569/1284/7099/3689/1282/3912/7097/3554/7040/3915/3913/2774/912/5295/3910/87/2769/7043/7042/5567/6318/7414/5290/1286/5272/3315/913/3458/5293/3586/6317/3576/5579
hsa04933	AGE-RAGE signaling pathway in diabetic complications	99	0.645519	2.08313	2.43802e-09	1.01787e-07	5.58177e-08	2121	tags=40%, list=13%, signal=35%	6401/1277/6347/50507/7424/2335/1278/1281/5054/3569/7412/1284/7046/1282/185/7040/7056/183/1958/3383/5295/7043/1536/7042/10000/7048/3717/5290/1286/7423/1906/5293/5292/4772/2308/3576/5594/5579/6774/6776
hsa05310	Asthma	23	0.645481	1.64187	0.00746422	0.0232995	0.0127769	3183	tags=57%, list=20%, signal=45%	2207/6356/3119/3113/2205/3586/3115/3109/3122/958/2206/3111/3117
hsa04380	Osteoclast differentiation	123	0.639282	2.11621	1e-10	5.56667e-09	3.05263e-09	2565	tags=46%, list=16%, signal=38%	1513/2213/7305/54209/2212/1436/4688/2215/7046/10288/8600/3554/2534/7040/4982/3937/54/4286/11006/4689/5295/9021/7042/10859/1540/10000/7048/695/5290/126014/10990/3726/6688/9846/3458/5293/7132/5533/2354/653361/4772/5594/140885/814/11027/4773/11025/79168/3932/6885/3455/5602/5971/2353/4791/2355
hsa05150	Staphylococcus aureus infection	73	0.619871	1.92861	5.43288e-06	6.48065e-05	3.55384e-05	2277	tags=42%, list=14%, signal=37%	716/715/728/719/2359/713/2213/3684/712/714/2212/3075/3689/3119/718/2215/1675/3426/2357/3383/6403/3113/2358/5724/3683/3586/3115/3109/3122/6404/2266
hsa05140	Leishmaniasis	69	0.613959	1.89089	2.06625e-05	0.00020913	0.000114682	3025	tags=49%, list=19%, signal=40%	3684/2212/4688/7099/3689/3119/718/2215/3676/7097/7040/5743/4689/3113/7043/1536/7042/3717/3688/3458/3586/3115/653361/5594/5579/3109/3122/6885/2353/1378/3111/3716/51135/7189
hsa04640	Hematopoietic cell lineage	89	0.609571	1.94972	1.18791e-06	2.68638e-05	1.47315e-05	2530	tags=43%, list=16%, signal=36%	929/3684/3569/948/1436/3119/3676/3554/3678/3589/3672/1438/912/3113/960/3570/3575/914/3563/925/947/3815/913/945/952/3559/3115/966/951/3109/3122/4311/1441/1440/3566/917/915/1378
hsa05323	Rheumatoid arthritis	82	0.608397	1.91811	1.67442e-06	3.49534e-05	1.91677e-05	2292	tags=40%, list=14%, signal=35%	1513/6347/6387/3569/7099/3689/3119/942/8600/1514/7097/10673/6372/7040/284/3589/3383/54/3113/3606/7043/7042/6352/3683/3458/526/3115/7010/3576/3109/3122/3600/2321
hsa04620	Toll-like receptor signaling pathway	85	0.605511	1.9245	3.05091e-06	4.64412e-05	2.54673e-05	2503	tags=35%, list=16%, signal=30%	1513/23643/7096/6696/929/3569/51311/7099/4283/3627/51284/942/6351/6373/7097/5295/6352/10000/5290/1326/5293/3576/5594/6885/3455/6416/7100/5602/958/2353
hsa05416	Viral myocarditis	53	0.601863	1.79015	0.000275566	0.00184078	0.00100944	2411	tags=36%, list=15%, signal=31%	3908/6444/3689/3119/942/2534/857/3383/3113/6443/27/3683/25/6442/3115/3109/3122/5880/958
hsa04392	Hippo signaling pathway - multiple species	28	0.599794	1.58414	0.00911564	0.0269741	0.014792	2080	tags=43%, list=13%, signal=37%	122786/79633/9770/25937/8642/26524/126374/10413/84962/7003/60485/83937
hsa04510	Focal adhesion	195	0.59586	2.04913	1e-10	5.56667e-09	3.05263e-09	2859	tags=42%, list=18%, signal=35%	7058/7060/1311/3479/1277/1292/7057/3908/5159/3371/56034/7424/2335/1278/6696/1293/2316/10398/1284/4638/2318/1282/3480/3912/3676/2534/857/3693/3082/858/3915/3913/3678/3679/55742/3672/3685/3791/1291/399694/5295/3910/87/7059/7791/7450/7409/63923/10000/7414/5290/1286/3688/7423/5293/5156/80310/4659/5594/894/3611/5579/5228/3680/6654/2321/7094/5880/5728/5602/5906/22801/23396/5155/1499/2889/5649/5908/4660…
hsa05143	African trypanosomiasis	34	0.595072	1.64341	0.00333846	0.0119897	0.00657489	2327	tags=35%, list=15%, signal=30%	6401/3569/7412/355/3383/3910/3606/3620/3458/3586/5579/8542
hsa05330	Allograft rejection	32	0.594168	1.61483	0.0058276	0.0188973	0.0103628	3183	tags=41%, list=20%, signal=33%	3119/942/355/3002/3113/3458/3586/3115/3109/3122/958/3111/3117
hsa04923	Regulation of lipolysis in adipocytes	52	0.590551	1.74512	0.000856987	0.00414831	0.00227484	2835	tags=44%, list=18%, signal=36%	2167/5592/3667/5743/2770/5295/5567/5733/5742/10000/5290/2771/113/5293/196883/8660/109/4886/4881/11343/3643/2773/154
hsa05414	Dilated cardiomyopathy	93	0.589403	1.8883	3.059e-06	4.64412e-05	2.54673e-05	2511	tags=37%, list=16%, signal=31%	5350/3479/3908/6444/1674/3676/3693/7040/183/3678/3679/781/3672/3685/70/55799/7168/7043/7042/5567/7171/6443/3688/6442/113/775/196883/109/6262/3680/783/6546/22801/784
hsa04061	Viral protein interaction with cytokine and cytokine receptor	91	0.58695	1.88111	5.26417e-06	6.48065e-05	3.55384e-05	1730	tags=38%, list=11%, signal=34%	10344/6347/6355/6387/6356/3569/1436/4283/3627/1230/6351/6362/6373/729230/6372/3587/7852/11009/3572/6366/1234/3606/57007/3570/6352/7133/6354/3560/1524/3579/6363/3586/10563/7132/3559
hsa05332	Graft-versus-host disease	33	0.586412	1.60665	0.00790944	0.0244607	0.0134137	2028	tags=33%, list=13%, signal=29%	3569/3119/942/355/3824/3002/3113/3458/3115/3109/3122
hsa04613	Neutrophil extracellular trap formation	106	0.584461	1.90732	2.69764e-06	4.57424e-05	2.50841e-05	2370	tags=33%, list=15%, signal=28%	728/2359/3684/2212/51311/4688/7099/3689/718/2215/51284/64581/7097/2357/366/6403/4689/5295/1536/7450/2358/10000/3683/5290/5293/2244/653361/5594/5579/9759/6404/2266/837/6885/5880
hsa04350	TGF-beta signaling pathway	87	0.583847	1.86125	1.68374e-05	0.00018248	0.000100068	2965	tags=43%, list=19%, signal=35%	26585/3624/2200/1634/7057/4052/10468/7046/7040/2331/4093/56963/1030/4092/3400/7043/64388/7042/9241/658/7048/659/3458/4681/3625/90/3399/5594/64750/57817/60436/353500/9765/657/2033/3398/92
hsa05142	Chagas disease	98	0.582455	1.87714	3.40742e-06	4.94816e-05	2.71346e-05	3025	tags=42%, list=19%, signal=34%	6347/713/5054/712/3569/714/7099/718/7046/7097/7040/355/2774/2770/5295/2769/7043/7042/6352/624/10000/7048/5290/2771/3458/5293/3586/7132/8837/3576/5594/6416/5602/917/2353/915/9630/2773/919/51135/7189
hsa05133	Pertussis	68	0.581461	1.79136	0.000313366	0.00205224	0.0011254	1952	tags=32%, list=12%, signal=28%	716/710/715/713/23643/929/1073/3684/712/3569/714/7099/3689/718/6372/3678/2770/3688/2771/3586/3576/5594
hsa05205	Proteoglycans in cancer	195	0.58062	1.99672	1e-10	5.56667e-09	3.05263e-09	2267	tags=35%, list=14%, signal=31%	7291/3479/7472/1634/4060/1277/7057/2247/8324/7078/2335/1278/2316/6383/5328/5962/7099/2318/117581/7482/1514/3480/7097/2535/857/3693/7474/7040/3082/22808/858/6237/355/2719/3678/3059/3316/3339/4318/3708/3685/3791/8321/5295/960/4478/7042/5567/7409/22800/10000/5290/3688/11211/5293/10855/8322/3709/5329/4659/5594/7157/287/2260/5579/6774/2817/6654/7074
hsa05410	Hypertrophic cardiomyopathy	88	0.572343	1.82645	2.76584e-05	0.000256609	0.000140718	2511	tags=35%, list=16%, signal=30%	3479/3908/6444/3569/1674/3676/3693/7040/183/3678/3679/781/3672/3685/70/55799/7168/7043/7042/7171/6443/3688/6442/1906/775/6262/3680/783/6546/22801/784
hsa04974	Protein digestion and absorption	93	0.564529	1.80861	2.25638e-05	0.000216239	0.000118581	1477	tags=30%, list=9%, signal=27%	1300/1301/1303/1295/1289/1277/1296/1292/1290/1278/1281/1293/1306/1359/1284/1282/1307/81578/80781/1294/1291/477/2006/7373/50509/9056/120103/1286
hsa05321	Inflammatory bowel disease	59	0.563721	1.70173	0.00123982	0.00555461	0.00304602	3333	tags=47%, list=21%, signal=38%	3569/7099/3119/7097/7040/3113/3606/7043/7042/6095/3458/3586/3115/6775/4772/50615/3109/3122/6774/64127/4094/7100/3566/3111/2625/3117/3561/3595
hsa04658	Th1 and Th2 cell differentiation	87	0.561011	1.78845	8.78263e-05	0.000682186	0.000374095	4203	tags=55%, list=27%, signal=41%	3119/4854/84441/4853/3113/28514/3717/3560/864/3458/3559/3115/5533/6775/4772/5594/3109/3122/4773/6776/3932/4094/5602/3566/917/2353/915/5532/5588/919/3111/3716/2625/27040/3117/3561/3595/6777/3516/182/4790/3551/1432/916/6772/5970/3459/920
hsa05134	Legionellosis	53	0.555955	1.65361	0.00283646	0.0108702	0.00596097	2673	tags=34%, list=17%, signal=28%	929/3684/3569/7099/3689/3306/718/7097/3606/3310/664/4671/3576/58484/7100/4791/1378/1195
hsa01521	EGFR tyrosine kinase inhibitor resistance	78	0.552224	1.73123	0.000374733	0.00240694	0.00131991	3173	tags=41%, list=20%, signal=33%	3479/5159/2247/56034/3569/558/3480/3082/3791/399694/5295/3570/10000/2621/3717/5290/5293/5156/80310/5594/5579/6774/6654/5728/5155/2549/581/5336/6464/3716/25759/673
hsa04213	Longevity regulating pathway - multiple species	58	0.551323	1.66578	0.00177483	0.00731844	0.00401327	2237	tags=29%, list=14%, signal=25%	3479/1410/3306/3480/3667/5295/3310/5567/10000/5290/113/5293/196883/8660/109/2308/6648
hsa04514	Cell adhesion molecules	133	0.549779	1.83669	2.5215e-06	4.57424e-05	2.50841e-05	2411	tags=43%, list=15%, signal=37%	1462/6401/3684/6383/58494/7412/3689/3119/257194/942/3676/5797/9369/1003/5788/3383/6403/5010/3685/6402/57502/3113/6614/23705/9076/914/925/947/4267/1272/3683/90952/3688/83700/3384/7122/3115/3897/84628/22829/29851/80380/23114/3109/3122/83692/29126/1000/3680/8506/6404/201633/1001/9672/9379/965/958
hsa04611	Platelet activation	117	0.548769	1.80661	2.03663e-05	0.00020913	0.000114682	2441	tags=35%, list=15%, signal=30%	1277/2207/1278/1281/2212/4638/2534/8605/2149/3937/5592/3708/2770/5295/5567/7450/5294/2977/5742/10000/695/5290/6916/3688/2771/113/10125/5293/196883/64805/2244/3709/109/10235/4659/5594/83706/2266/7094/10672/5906
hsa05152	Tuberculosis	156	0.543293	1.84208	1.20646e-06	2.68638e-05	1.47315e-05	3187	tags=38%, list=20%, signal=31%	2207/2213/7096/929/4360/3684/3569/2212/7099/3689/3119/718/2215/8877/64581/7097/7040/9902/3587/3113/3606/7043/7042/3687/10000/3717/1051/26253/4046/3458/3586/7132/3115/5533/11151/5594/3109/1509/3122/64127/972/22925/8411/3916/10892/5602/1378/1520/4801/581/2033/5532/5868/3111/3716/51135/7189/1385/3117/1263
hsa05145	Toxoplasmosis	103	0.542941	1.7654	8.51378e-05	0.000682186	0.000374095	3027	tags=40%, list=19%, signal=32%	3908/23643/7099/3119/3306/3912/7097/7040/3915/3587/3913/2770/1234/3910/3113/3310/7043/7042/5294/10000/3717/3688/2771/3458/3586/7132/3115/5594/3109/3122/6774/6885/5602/958/240/2773/3111/3716/51135/7189/3911
hsa04670	Leukocyte transendothelial migration	106	0.535337	1.74701	0.000139448	0.00103502	0.000567579	2858	tags=43%, list=18%, signal=36%	7070/6387/3684/58494/7412/10398/4688/3689/3676/1003/7852/3383/4318/5010/2770/4689/5295/87/3702/4478/1536/9076/7409/7414/4267/3683/90952/5290/3688/2771/83700/11069/7122/5293/653361/5579/83692/399/5880/5906/1499/29119/5336/2773/5908/83593
hsa04540	Gap junction	82	0.531863	1.67682	0.000462093	0.00280617	0.00153884	1994	tags=28%, list=13%, signal=25%	3357/5159/56034/84617/2697/7846/5592/3708/2770/3356/1902/347733/5567/2977/2771/113/196883/5156/3709/80310/109/5594/5579
hsa04340	Hedgehog signaling pathway	51	0.530734	1.56538	0.010068	0.0289889	0.0158968	3974	tags=45%, list=25%, signal=34%	2619/2737/91653/23432/2735/5567/57758/2736/2121/1954/894/64750/408/5727/1452/11127/8405/409/50937/596/132884/84455/374654
hsa04662	B cell receptor signaling pathway	79	0.529112	1.66098	0.00123208	0.00555461	0.00304602	2873	tags=38%, list=18%, signal=31%	2213/10288/971/11006/5295/10859/7409/10000/695/5290/25780/975/10990/5293/5533/118788/4772/5594/5579/11027/4773/11025/79168/6654/8519/10892/5880/2353/5336/5532
hsa04072	Phospholipase D signaling pathway	139	0.521962	1.7496	1.69367e-05	0.00018248	0.000100068	2921	tags=36%, list=18%, signal=30%	2207/5159/56034/5737/8877/185/2534/22808/6237/183/8605/2149/552/56895/1759/1902/399694/5295/5294/22800/10000/5290/10161/3815/11069/113/9846/5293/196883/3579/2205/2846/5156/80310/109/3576/5594/2768/6654/5337/10672/23396/5155/5900/2549/3643/5336/6464/9162/2206
hsa04659	Th17 cell differentiation	101	0.518246	1.67901	0.000547583	0.00304821	0.00167157	3642	tags=47%, list=23%, signal=36%	3569/3119/7046/3554/7040/3572/3113/3570/7048/3717/3560/6095/3458/3559/3115/5533/196/4772/50615/5594/10148/3109/3122/4773/6774/6776/3932/5602/3566/917/2353/915/5532/5588/919/3111/3716/2625/27040/3117/3561/6777/3091/3556/4790/9466/3551
hsa05218	Melanoma	72	0.517907	1.61292	0.00286401	0.0108702	0.00596097	2719	tags=36%, list=17%, signal=30%	3479/5159/2247/56034/3480/3082/4616/4286/2252/5295/2255/10000/5290/5293/5156/2254/80310/51426/5594/7157/2260/5728/5155/1026/26281/581
hsa04650	Natural killer cell mediated cytotoxicity	103	0.510551	1.66009	0.000535326	0.00303049	0.00166185	3616	tags=41%, list=23%, signal=32%	2207/7305/3689/2215/2534/355/3937/3383/10870/399694/5295/3824/3002/7409/3683/5290/3384/3458/5293/5533/962/80328/4772/5594/5579/4773/3932/6654/3455/5880/5336/6464/5532/919/25759/27040/673/4068/3454/53358/2885/5551
hsa04625	C-type lectin receptor signaling pathway	98	0.509969	1.64353	0.00040448	0.00254899	0.00139781	2888	tags=34%, list=18%, signal=28%	1959/2207/3569/1960/64581/22808/6237/53342/5743/3708/5295/22800/1540/10000/5290/26253/4046/5293/3586/5533/3709/4772/5594/4773/10892/5602/5971/4791/114548/5336/868/5532/6773
hsa04926	Relaxin signaling pathway	127	0.509905	1.69483	8.42217e-05	0.000682186	0.000374095	3592	tags=41%, list=23%, signal=32%	1277/7424/1278/1281/1284/7046/1282/4322/2791/7040/59/1910/4318/2770/399694/5295/59345/2769/5567/10000/7048/5290/1286/7423/2771/113/1906/5293/196883/109/5594/6654/408/6416/5602/10681/2353/55970/2790/2773/6464/4313/4312/1385/25759/64764/2782/53358/9586/409/4790/2885
hsa05412	Arrhythmogenic right ventricular cardiomyopathy	75	0.507273	1.58577	0.00410295	0.0141277	0.0077473	2884	tags=36%, list=18%, signal=30%	3908/6444/2697/1674/3676/83439/3693/3678/3679/781/3672/3685/55799/6443/3688/6442/775/6262/1000/3680/783/6546/22801/784/1499/29119/1756
hsa04140	Autophagy - animal	137	0.506935	1.69231	6.28718e-05	0.000538441	0.000295269	4198	tags=46%, list=26%, signal=34%	58528/1514/3480/22808/6237/1508/3667/23710/3708/81671/5295/5567/664/22800/10000/5290/55062/10325/5293/53349/8660/8837/5594/10670/7405/1509/22863/10010/9706/54541/3916/6885/5728/5602/203228/51100/81631/83452/9821/29982/84557/5588/9342/7189/55255/64121/11337/7248/3920/5563/8408/3091/5289/3476/596/8503/10533/84938/11345/2081/26100/5515/9140
hsa04062	Chemokine signaling pathway	181	0.506403	1.73733	7.32461e-06	8.43594e-05	4.62607e-05	3592	tags=45%, list=23%, signal=35%	10344/6347/6355/6387/6356/4283/3627/1230/3055/6351/9844/6362/6373/729230/6372/2791/7852/6366/2770/1234/399694/5295/59345/3702/2268/5567/6352/1794/5294/7409/57580/6354/10000/3717/5290/2771/1524/113/5293/196883/3579/6363/10563/58191/109/653361/3576/10235/5594/5579/6774/5473/6654/7074/408/5880/5906/10681/2826/55970/2790/5336/2773/5908/10663/6464/1398/6376/6773/1232/25759/1236/673/2782/6368/6777/5335…
hsa05171	Coronavirus disease - COVID-19	193	0.505024	1.73678	4.79118e-06	6.48065e-05	3.55384e-05	3025	tags=26%, list=19%, signal=21%	716/715/728/6347/719/730/713/712/3569/714/2212/51311/7099/718/3627/51284/2162/185/7097/1675/8829/3572/6403/5295/1536/3570/7450/5290/5293/7132/2244/3576/5594/5579/6774/1440/2266/6885/3455/5602/2353/6868/114548/4314/5336/6773/3716/51135/4312/7189
hsa04015	Rap1 signaling pathway	199	0.504569	1.73623	2.73906e-06	4.57424e-05	2.50841e-05	3373	tags=43%, list=21%, signal=34%	3479/7057/5159/2247/56034/7424/3684/5587/1436/3689/3480/3082/22808/6237/2357/284/2149/3937/2770/3791/2252/1902/55740/5295/51466/2255/57568/7409/23683/9732/5217/10000/3683/5290/25780/3688/7423/2771/3815/11069/113/5293/196883/9693/2846/5156/7010/2254/80310/109/64411/10235/5594/2260/5579/285/5228/9863/7074/2321/7094/26037/5880/1946/5906/5155/1499/5900/26281/2889/3643/2773/5908/83593/1398/8631/4804/8…
hsa04668	TNF signaling pathway	108	0.502795	1.64669	0.000818023	0.00401793	0.00220334	3847	tags=45%, list=24%, signal=35%	6401/6347/7424/3569/7412/3627/6372/355/4323/3383/5743/4318/5295/9021/6352/7133/10000/3976/5290/1051/3726/1326/1906/5293/7132/8837/5594/7128/64127/3600/6885/6416/5602/2353/7185/4314/6376/1385/64764/182/9586/2919/23118/4790/3551/257397/8503/7187/1432
hsa04630	JAK-STAT signaling pathway	144	0.498763	1.6754	8.67192e-05	0.000682186	0.000374095	2598	tags=33%, list=16%, signal=28%	5159/2690/2273/3569/9180/53342/3587/316/11009/3572/3589/1438/1439/5295/9021/3570/3575/3563/10000/3717/3976/3560/5290/1489/9655/3458/5293/3586/3559/85480/5156/5292/6775/50615/894/4170/6774/6776/1441/1440/5008/3600/6654/3455/3566/5155/1026
hsa04010	MAPK signaling pathway	280	0.497785	1.74687	1.2698e-07	3.53428e-06	1.93812e-06	3173	tags=36%, list=20%, signal=30%	3479/5159/2247/56034/7424/929/2316/1436/3306/2318/7046/4208/3480/3554/1847/7040/3082/22808/6237/355/8605/284/781/4616/5924/3791/2252/3310/55799/7043/7042/5567/2255/22800/11221/10000/7048/25780/7423/3815/3315/5922/1326/10125/9448/775/9693/7132/5533/5156/7010/1845/2254/80310/4772/10235/5594/7157/2260/5579/285/4215/2768/5228/4214/6654/1848/2321/783/6885/408/6416/5880/1946/5602/5971/5906/2353/784/479…
hsa05221	Acute myeloid leukemia	65	0.497261	1.5228	0.0103769	0.029623	0.0162446	3754	tags=43%, list=24%, signal=33%	929/3684/1436/83439/862/5295/597/10000/5290/3815/6688/5293/5292/5594/6774/7704/6776/6654/1848/1050/673/6777/4609/4790/51176/2885/3551/8503
hsa04151	PI3K-Akt signaling pathway	328	0.496471	1.75203	5.28405e-09	1.76487e-07	9.67816e-08	2762	tags=31%, list=17%, signal=26%	7058/7060/1311/3479/1277/1292/7057/3908/5159/3371/2247/56034/7424/2690/2335/1278/6696/1293/3569/1436/1284/7099/1282/3480/3912/3676/7097/9180/3693/2791/3082/3915/3913/3678/284/3679/2149/3667/3672/3685/3791/1291/2252/1902/5295/3910/7059/59345/3570/2255/7450/5294/3575/3563/63923/10000/3717/3560/5290/10161/1286/3688/7423/3815/5293/2846/3559/5156/7010/118788/2254/80310/5594/894/7157/2260/4170/285/5228…
hsa04924	Renin secretion	65	0.496167	1.51945	0.0112793	0.0316577	0.0173604	1846	tags=29%, list=12%, signal=26%	1909/5139/5136/185/183/1508/358/3778/3708/2770/3759/5567/2977/2771/1906/5732/775/5533/3709
hsa04064	NF-kappa B signaling pathway	99	0.492856	1.59047	0.00207906	0.00836999	0.00458991	3787	tags=45%, list=24%, signal=35%	23643/6387/929/7412/5328/7099/6351/8600/3554/10673/6366/3383/5743/4616/1540/597/695/6363/7132/8837/3576/5579/7128/3932/10892/6885/5971/958/4791/7185/5336/5588/51135/23085/7189/472/27040/1459/2919/23118/4790/3551/596/257397/7187
hsa04270	Vascular smooth muscle contraction	123	0.490666	1.62425	0.000593945	0.00325209	0.00178337	2033	tags=29%, list=13%, signal=26%	1909/4628/94274/10203/800/10398/4638/4629/185/72/10267/59/3779/183/8605/5592/3778/3708/552/10268/5567/2977/4627/4882/113/1906/5583/775/196883/3709/109/4659/5594/5579/10266/2768
hsa05235	PD-L1 expression and PD-1 checkpoint pathway in cancer	86	0.490283	1.55852	0.00712036	0.0226495	0.0124205	4409	tags=49%, list=28%, signal=35%	7099/7097/5295/10000/3717/5290/10125/3458/5293/5533/4772/5594/55509/4215/4773/6774/29126/3932/10538/5728/917/2353/915/5532/5588/919/3716/7189/27040/3091/1459/4790/3551/8503/1432/916/6772/5970/3459/920/5530/5600
hsa04664	Fc epsilon RI signaling pathway	62	0.489445	1.48258	0.0140948	0.0389063	0.0213353	2921	tags=34%, list=18%, signal=28%	2207/2534/8605/3937/241/5295/7409/10000/695/5290/9846/5293/2205/5594/6654/6416/5880/5602/240/5336/2206
hsa04520	Adherens junction	63	0.489228	1.48996	0.016694	0.0441425	0.0242067	2853	tags=38%, list=18%, signal=31%	6591/10810/8936/7046/3480/5797/2534/83439/10580/87/6615/7048/7414/5787/5594/2260/6885/2241/5880/1499/3643/29119/2033/8826
hsa04810	Regulation of actin cytoskeleton	211	0.481695	1.65905	2.94165e-05	0.000265543	0.000145618	2859	tags=33%, list=18%, signal=28%	4628/5159/2247/56034/6387/2335/1073/8936/3684/10398/5962/3689/4638/4629/3676/9459/3693/22808/6237/3678/7852/3679/2149/3672/3071/623/3685/2252/1902/55740/5295/87/5305/4478/2255/7409/22800/2245/3687/4627/5217/624/7414/3683/5290/3688/5293/2846/5156/2254/80310/4659/5594/2260/2768/3680/6654/7074/5880/10672/22801/54434/23396/5155/26281/55970/4660/5063/8826/1398
hsa04060	Cytokine-cytokine receptor interaction	257	0.478787	1.66936	5.05014e-06	6.48065e-05	3.55384e-05	2202	tags=30%, list=14%, signal=26%	3624/10344/7292/6347/6355/90865/2690/6387/6356/3569/1436/4283/3627/1230/7046/6351/8600/6362/6373/3554/729230/10673/9180/6372/7040/355/53342/4982/3587/7852/11009/3572/3589/6366/1438/1439/1234/3606/57007/7043/7042/3570/6352/7133/3575/3563/658/6354/7048/51330/3976/3560/94/659/1524/1489/3458/3579/6363/3586/10563/7132/3559/85480/3625/90/58191/50615/3576/10148/939/1441/9966/1440/5473/5008/3600
hsa04142	Lysosome	127	0.478672	1.59101	0.000785108	0.00391382	0.00214625	3960	tags=48%, list=25%, signal=36%	1513/1519/1514/7805/8905/1508/54/1075/3988/2799/9516/5641/8907/23659/411/5660/2760/4125/4758/10577/427/1200/950/2548/57192/8692/1509/1203/4668/8722/11154/3916/5538/4864/175/5476/1657/1520/3482/84572/3074/4074/1522/2581/138050/6272/6448/967/9741/1497/3920/2717/245972/53/4126/1176/285362/3423/23335/23163/27074
hsa05418	Fluid shear stress and atherosclerosis	128	0.478396	1.58998	0.00143386	0.0062196	0.00341069	2699	tags=33%, list=17%, signal=27%	6401/6347/6383/7412/4688/4208/1514/3554/857/3162/1003/7056/858/5327/3383/4318/3685/3791/5295/658/10000/5290/659/1906/3458/5293/7132/90/653361/7157/4205/2817/6885/6416/5880/5602/2353/1843/5155/1499/657/2949
hsa04371	Apelin signaling pathway	133	0.468087	1.56377	0.0017351	0.00724405	0.00397247	2790	tags=30%, list=18%, signal=25%	6696/5054/100506013/4638/8877/7046/4208/185/2791/22808/6237/59/187/1958/5327/3708/4854/2770/59345/5567/5294/22800/10000/2771/113/196883/3709/109/5594/814/9759/6262/4205/6546/10672/10681/81631/55970/2790/2773
hsa04310	Wnt signaling pathway	158	0.466394	1.58391	0.00101931	0.00472847	0.00259298	2961	tags=28%, list=19%, signal=23%	6424/6423/84870/5176/7472/8324/166336/4920/144165/64321/7482/22943/2535/2487/83439/7474/4316/6422/23500/8321/27123/5567/11211/5533/8322/4772/894/7157/5579/7089/340419/4773/7090/6885/4919/5880/5602/1499/6907/7976/2033/5532/23002/50964/1452
hsa05206	MicroRNAs in cancer	156	0.465694	1.57897	0.000694997	0.00363833	0.00199518	2859	tags=37%, list=18%, signal=30%	1545/23414/7057/5159/3371/7078/9839/5328/5962/7431/3162/3678/6624/3667/5743/4318/4854/4853/399694/5295/5243/7168/960/7042/4082/63923/5290/25/659/5293/5156/5292/8660/5594/894/7157/5579/4170/9759/8434/6774/2744/6654/6659/54541/1946/27086/5728/90427/5155/1026/7976/10253/2033/5336/6464/1398
hsa05202	Transcriptional misregulation in cancer	162	0.465342	1.58276	0.000704855	0.00363833	0.00199518	2719	tags=33%, list=17%, signal=28%	3479/929/3684/3569/5328/1436/4211/4208/942/3480/3486/862/26471/5090/5327/9915/3087/4616/4318/2078/4286/3002/604/5087/7102/8013/4005/2313/597/7048/3560/1051/6688/55589/4291/860/221037/51426/2308/3576/5218/894/7157/7704/4094/1848/2321/958/1026/7490/7185/4314/1050/581
hsa04022	cGMP-PKG signaling pathway	157	0.461978	1.56818	0.000919752	0.00438853	0.00240657	2065	tags=25%, list=13%, signal=22%	5350/1909/3764/5139/10398/4638/4208/185/493/3779/1910/5592/3667/3778/7225/3708/2770/477/5997/5294/2977/4882/624/10000/5138/2771/113/775/196883/5533/3709/8660/109/4772/4659/5594/2768/4773/4205
hsa05167	Kaposi sarcoma-associated herpesvirus infection	178	0.459418	1.57309	0.000532688	0.00303049	0.00166185	4176	tags=44%, list=26%, signal=33%	2247/9976/3569/718/1230/3055/942/83439/2791/355/3572/3383/5743/3708/1234/5295/59345/5294/57580/10000/3717/1827/5290/5293/7132/5533/7538/3709/4772/3576/5594/7157/285/4773/6774/22863/3455/6416/5602/10681/81631/2353/5155/1499/1026/55970/581/2033/2790/5336/5532/6773/84557/3716/1232/1385/2782/3454/3091/5289/4609/2919/4790/51176/3551/4776/8503/3665/7187/1432/7311/5925/6772/2793/5970/3133/3459/100507436
hsa05220	Chronic myeloid leukemia	75	0.459274	1.43572	0.0188595	0.0477203	0.0261687	4302	tags=53%, list=27%, signal=39%	7046/7040/4616/399694/5295/7043/7042/10000/7048/5290/25/9846/5293/51426/5594/7157/6776/6654/1026/867/581/6464/1398/25759/673/6777/53358/4609/1027/4790/2885/4193/3551/8503/1647/5925/5970/1643/1399/613
hsa05224	Breast cancer	141	0.458188	1.53587	0.00207997	0.00836999	0.00458991	3592	tags=40%, list=23%, signal=32%	3479/7472/2247/8324/7482/8600/3480/2535/83439/7474/26508/23462/4616/4854/8321/2252/4853/399694/5295/28514/2255/10000/5290/3815/11211/5293/8322/2254/5241/23493/51426/5594/7157/2260/6654/5728/2353/4791/1499/8648/1026/26281/7976/581/6464/1452/25759/673/8817/7483/182/53358/7481/4609/4855/51176/2885
hsa04666	Fc gamma R-mediated phagocytosis	89	0.457811	1.46432	0.0149084	0.0408149	0.0223819	2478	tags=28%, list=16%, signal=24%	2213/1073/10810/8936/2212/2215/8877/3055/273/8605/5788/50807/5295/7409/4082/10000/5290/9846/5293/653361/5594/5579/5337/5880/23396
hsa04014	Ras signaling pathway	215	0.45636	1.57537	0.000216993	0.00150991	0.000828	3153	tags=36%, list=20%, signal=29%	3479/5159/2247/56034/7424/1436/3480/2791/3082/22808/6237/51365/8605/284/2113/5924/3791/2252/399694/5295/59345/23179/5567/2255/22800/10000/27/5290/25/25780/7423/3815/5922/9846/10125/5293/5156/7010/2254/80310/10235/5594/2260/5579/285/5228/6654/7074/2321/5337/5880/1946/5602/5906/10681/5155/5900/2549/26281/55970/3643/2790/5336/5908/5063/6464/83593/5322/5868/2323/4804/55770/22821/4254/6789/25759/27040…
hsa04068	FoxO signaling pathway	126	0.455443	1.5136	0.00464202	0.0155427	0.00852326	3976	tags=45%, list=25%, signal=34%	3479/3569/7046/114907/3480/7040/9454/3667/1030/23710/4616/5295/10769/1901/604/7043/7042/664/3575/10000/7048/5290/9456/901/5293/3586/8660/2308/5594/894/6774/6648/80854/6654/6446/5728/5602/1026/3643/2033/472/6789/11337/673/1263/5563/2309/1027/5565/2885/4193/3551/8503/1432/23411/1647/11345
hsa05162	Measles	121	0.452009	1.49566	0.00547568	0.0179302	0.0098325	3787	tags=39%, list=24%, signal=30%	2213/3569/7099/3306/51284/7097/355/5295/3310/4478/10000/3560/5290/51209/5293/3559/894/7157/7128/6774/6776/6885/3455/9367/5602/917/2353/915/6504/581/868/6773/3716/51135/7189/3561/3454/6777/1459/23118/1027/4790/3551/596/8503/3665/7187
hsa05132	Salmonella infection	241	0.446355	1.54986	0.000149809	0.00108774	0.000596493	4194	tags=44%, list=26%, signal=33%	23643/929/2316/10810/3569/84617/10398/7099/2318/9844/7846/57381/113146/7097/83439/6237/5788/3071/1781/347733/3606/5294/5420/5217/10000/5290/3831/4671/51209/5293/7132/23207/3576/5594/112574/10640/26084/6281/388/399/1780/837/6885/6416/9367/10392/58484/7100/5602/5286/6990/2353/1499/391/114548/51429/10121/55207/581/3840/5063/4074/5585/55860/79026/5868/51135/7189/55770/27072/29109/79659/55823/10096/23…
hsa04550	Signaling pathways regulating pluripotency of stem cells	131	0.445667	1.48481	0.00416747	0.0142034	0.00778883	2069	tags=24%, list=13%, signal=21%	3624/3479/7472/2247/8324/4211/7482/3480/2535/7474/3572/4093/8321/3670/5295/3400/6498/658/10000/3717/3976/5290/659/11211/5293/3625/8322/90/3399/5594/2260/6774
hsa04360	Axon guidance	179	0.445437	1.52511	0.00227515	0.00904641	0.00496084	2873	tags=32%, list=18%, signal=27%	9353/7220/6387/1073/10398/2043/91653/6091/2534/7474/6237/10154/7852/8829/1808/56963/7225/2770/55740/5295/6586/2045/658/10512/5290/2042/25/659/3688/2771/54910/5293/9723/4690/22885/5533/3897/84628/56920/219699/5594/3611/4773/5880/1946/5727/2242/6092/54434/59277/7223/9037/7976/5336/2773/91584/5063/5532
hsa04020	Calcium signaling pathway	232	0.44282	1.53529	0.000243692	0.00166108	0.000910899	2060	tags=23%, list=13%, signal=21%	5350/3357/1909/5159/2247/56034/7424/5737/5136/4638/8877/5027/185/845/10800/493/3082/7852/2149/1910/2774/623/3708/552/3791/2252/3356/57118/2769/6865/5567/2255/5724/5733/5021/624/7423/113/3269/775/196883/952/5533/5156/2254/3709/80310/109/2260/814/5579/57192/80228/6262
hsa04066	HIF-1 signaling pathway	103	0.442692	1.43944	0.0175576	0.0454592	0.0249288	2856	tags=30%, list=18%, signal=25%	3479/5054/7076/3569/7099/3480/3162/284/5295/1536/3570/10000/5290/1906/3458/5293/7010/5209/2026/5594/5579/285/6774/2321/3945/1026/3643/2033/5336/3101/405
hsa05200	Pathways in cancer	497	0.440837	1.57255	1.20046e-07	3.53428e-06	1.93812e-06	3027	tags=32%, list=19%, signal=27%	1909/3479/7472/3908/5159/2247/8324/7424/6387/2335/3569/1436/1284/2737/7046/1282/7482/185/3480/3912/2535/3162/83439/2791/7474/7040/3082/355/3915/862/183/3913/7852/2149/1910/3572/26508/23462/9915/1438/1439/1030/5743/4616/2113/4318/623/3685/4286/4854/2770/8321/2252/4853/1902/5295/3910/59345/7043/7042/2735/3570/5567/28514/2255/3575/3563/5733/624/10000/7048/3717/2736/3560/5290/10161/1286/25/2034/25780…
hsa05135	Yersinia infection	131	0.438756	1.46179	0.00606548	0.0194795	0.0106821	4203	tags=44%, list=27%, signal=33%	6347/2335/3569/2212/7099/9844/7456/3676/3678/3937/5295/3606/7409/925/10000/5290/3688/5293/3586/9815/4772/3576/5594/4773/3932/6885/6416/5880/58484/5602/23396/2353/391/114548/8935/5585/1398/51135/7189/6197/6196/27040/10096/60/10163/23118/4790/3551/63916/8503/7454/1432/387/5970/10097/998/29108/920
hsa05165	Human papillomavirus infection	307	0.435466	1.53542	0.000104491	0.000793178	0.000434961	1976	tags=20%, list=12%, signal=17%	7058/7060/1311/7472/1277/1292/7057/3908/5159/3371/8324/2335/1278/6696/1293/1284/1282/7482/3912/3676/2535/83439/3693/7474/355/3915/3913/3678/3679/26508/23462/3672/5743/3685/4854/1291/8321/84441/4853/5295/3910/7059/5567/7450/63923/57801/10000/5290/1286/3688/11211/5293/7132/526/8322/23493/2308/5594/894/7157
hsa05131	Shigellosis	213	0.432998	1.4948	0.00166031	0.00710954	0.00389871	4447	tags=44%, list=28%, signal=32%	58528/929/8936/10398/7099/718/9844/3554/23048/3678/3059/3708/5295/87/3606/960/664/6352/5217/10000/7414/5290/3688/55062/4671/10325/5293/7321/7132/3709/2308/3576/5594/10670/7157/3611/22863/837/10892/6885/7094/10392/58484/7100/5602/81631/114548/581/5336/3101/1398/84557/5588/7189/472/64121/10096/826/60/10163/5289/2309/23118/4790/4193/3551/63916/9267/596/257397/8503/1432/7311/387/6500/199746/5216/5970…
hsa05417	Lipid and atherosclerosis	191	0.428157	1.47145	0.00307322	0.011405	0.00625426	3025	tags=30%, list=19%, signal=24%	6401/4973/6347/23643/929/3569/948/7412/4688/7099/3306/7097/355/19/3383/6403/4318/3708/4689/5295/7436/3606/3310/1536/6352/7409/10000/3717/5290/5293/7132/5533/653361/4772/3576/5594/7157/4773/6774/10010/6648/6885/6416/5602/57534/958/5906/2353/114548/4314/581/5908/5452/5532/51135/4312/7189
hsa04921	Oxytocin signaling pathway	142	0.425822	1.42948	0.0100228	0.0289889	0.0158968	2873	tags=30%, list=18%, signal=24%	10398/4638/4208/8605/781/5743/3708/2770/3759/57118/55799/5997/5567/5294/2977/5021/4882/1827/2771/113/775/196883/952/5533/3709/109/4772/4659/5594/814/5579/6262/4773/783/140465/2353/784/1026/4881/2773/4660/5532
hsa05166	Human T-cell leukemia virus 1 infection	215	0.42452	1.46546	0.00238001	0.00935206	0.00512845	3754	tags=38%, list=24%, signal=30%	1959/3569/3689/3119/7046/3554/7040/4316/8829/1958/1030/3383/2113/5295/3113/4488/7043/7042/5567/10000/7048/3683/3560/5290/113/6688/5293/196883/7132/3559/3115/5533/7538/109/4772/5594/894/7157/3109/4215/3122/4773/6776/64784/4214/3600/3932/7094/6416/8379/5728/5602/5971/958/917/2353/915/4791/8850/1026/4801/581/6722/2033/5532/3111/3716/472/1385/3117/3561/64764/6777/9586/4609/10393/4790/821/3551/4776/44…
hsa04621	NOD-like receptor signaling pathway	158	0.423506	1.43826	0.00803525	0.0246218	0.013502	4207	tags=44%, list=27%, signal=32%	6347/3569/7099/5027/2634/3428/115362/1508/118429/23710/3708/2633/24145/3606/84168/1536/6352/115361/51393/7205/9051/4671/10135/3709/9447/3576/5594/22900/7128/64127/10628/10010/837/6885/3455/10392/58484/5602/81631/114548/6041/84674/5585/6773/84557/3716/51135/7189/199713/11337/3454/140609/2919/23118/4790/3551/114769/596/257397/3665/7187/1432/387/11345/6772/5970/29108/9140/2635
hsa05163	Human cytomegalovirus infection	204	0.419974	1.4435	0.0033757	0.0119945	0.00657751	3666	tags=34%, list=23%, signal=26%	6347/6387/3569/1230/6351/3554/2791/355/3587/7852/5743/3708/3685/2770/1234/5295/59345/3570/5567/6352/5733/10000/5290/2771/113/5732/5293/196883/3579/7132/5533/5156/3709/109/4772/3576/5594/7157/5579/2768/4773/6774/6654/5880/10672/10681/1499/1026/55970/581/2790/2773/1398/5532/6376/3716/1232/1385/7248/64764/2782/11214/9586/4609/4790/2885/4193/3551/4776
hsa05161	Hepatitis B	146	0.414239	1.39526	0.0164163	0.0438645	0.0240543	3847	tags=40%, list=24%, signal=30%	1959/3569/1960/7099/7046/7097/7040/355/3339/4318/5295/7043/7042/10000/7048/3717/5290/5293/6775/4772/3576/5594/7157/5579/4773/6774/6776/4214/6654/6885/6416/5602/2353/1026/581/2033/6773/3716/51135/7189/1385/673/64764/3454/6777/1654/9586/4609/23118/4790/2885/3551/4776/596/8503/3665/7187/1432
hsa05168	Herpes simplex virus 1 infection	428	0.357588	1.2707	0.0159138	0.0428646	0.0235059	4143	tags=32%, list=26%, signal=24%	6347/3569/29992/3119/718/7097/355/57343/3678/219749/5295/3113/10172/147694/9021/6352/29915/342926/55422/10000/3717/5290/146198/284406/284370/63934/80818/7771/148266/3458/5293/7132/3115/55786/7673/7768/342908/79088/54753/7157/126375/10780/3109/7773/3122/7770/147923/342909/80264/148268/972/51276/6885/10308/3455/390980/7596/146540/7562/163087/163081/6041/7767/163071/90075/162963/57573/80778/84924/65…

## Sheet: Supplement Table S3
ID	Description	setSize	enrichmentScore	NES	pvalue	p.adjust	qvalues	rank	leading_edge	core_enrichment
hsa04976	Bile secretion	76	-0.365386	-1.39104	0.0130494	0.0363209	0.0199175	3002	tags=34%, list=19%, signal=28%	361/7367/54658/1244/9376/6554/6522/3156/6513/64241/10864/200931/8714/8671/57552/54490/481/1576/8431/6523/6548/64240/54578/6550/7366/760
hsa01240	Biosynthesis of cofactors	129	-0.374742	-1.63367	0.000507359	0.00297294	0.00163029	3955	tags=42%, list=25%, signal=32%	4143/212/55163/51727/2356/203/60490/6472/124454/10797/2990/10327/84274/55312/7367/554235/54658/158067/7390/326625/29926/65220/10229/51805/112724/54995/23498/204/1719/217/80347/6470/5373/349565/441024/3145/10243/224/129607/2937/6697/125061/29968/1723/195814/54490/93100/122481/248/1728/53354/54578/7366/145226
hsa04146	Peroxisome	81	-0.381593	-1.49321	0.00293032	0.0109969	0.00603045	5235	tags=54%, list=33%, signal=37%	55670/8443/3295/5052/6342/373156/8799/1610/9409/2181/196743/92960/189/51555/23417/84769/6647/3155/8310/83594/54363/55825/4598/390916/5189/51703/5825/1384/11264/3418/26063/215/3417/8800/10005/2053/255027/5191/23600/5827/51268/11001/4843/7498
hsa04110	Cell cycle	124	-0.40774	-1.75835	2.26598e-05	0.000216239	0.000118581	2593	tags=34%, list=16%, signal=29%	1111/5001/5933/1029/1017/4172/85417/11200/1874/4175/3065/9133/8317/10926/4173/699/993/5111/1870/898/701/4085/891/4176/23594/4171/9700/7272/983/9232/890/5347/991/1869/9088/4998/995/2810/9134/990/8318/6502
hsa00982	Drug metabolism - cytochrome P450	52	-0.409444	-1.49327	0.0187	0.0476778	0.0261454	2188	tags=50%, list=14%, signal=43%	1544/7367/54658/4257/4259/2948/2329/124/2944/1565/1557/2940/1558/1571/2938/54490/1577/1559/1576/131/2330/54578/7366/119391/126/218
hsa00140	Steroid hormone biosynthesis	45	-0.425003	-1.5134	0.0154016	0.0418223	0.0229344	1089	tags=31%, list=7%, signal=29%	3294/1543/6783/1571/54490/1109/1577/1576/8644/79154/1645/54578/7366/3291
hsa04971	Gastric acid secretion	71	-0.437173	-1.67411	0.00101267	0.00472847	0.00259298	1481	tags=32%, list=9%, signal=30%	6522/7430/5578/810/1131/816/3274/5331/3710/481/54207/3772/91860/887/6548/3773/3784/496/2520/760/495/6750/9992
hsa00010	Glycolysis / Gluconeogenesis	62	-0.439301	-1.67758	0.0027263	0.0105882	0.00580632	2358	tags=48%, list=15%, signal=41%	7167/501/223/5214/5232/5211/221/2027/3948/10327/222/5160/130589/229/124/160287/217/5313/224/55902/3099/84532/2203/5106/230/80201/131/8789/126/218
Supplement Table S3: Hallmark pathways enriched in the low-risk groups based on GSEA.
hsa05204	Chemical carcinogenesis - DNA adducts	47	-0.43964	-1.58697	0.00912598	0.0269741	0.014792	3071	tags=60%, list=19%, signal=48%	1544/7367/54658/9/4257/4259/374875/2948/2944/1557/64816/2940/6817/1558/1543/6799/1571/2938/54490/873/1577/1559/1576/10/54578/7366/119391/1562
hsa00980	Metabolism of xenobiotics by cytochrome P450	57	-0.44352	-1.6426	0.00330145	0.0119857	0.00657267	1942	tags=51%, list=12%, signal=45%	1544/7367/54658/4257/4259/374875/2948/124/2944/1565/29785/2940/1543/27294/1571/2938/54490/873/1577/1559/1576/131/1645/54578/7366/119391/126/22977/218
hsa00830	Retinol metabolism	48	-0.45348	-1.63459	0.0112524	0.0316577	0.0173604	1484	tags=46%, list=9%, signal=42%	1544/7367/8608/54658/8854/112724/124/8694/29785/1558/1543/195814/54490/1577/1559/1576/131/54578/7366/145226/126/1562
hsa00983	Drug metabolism - other enzymes	59	-0.463446	-1.73422	0.00124729	0.00555461	0.00304602	4441	tags=54%, list=28%, signal=39%	83549/7372/79799/1548/4830/3704/51727/2990/7172/7367/3251/54658/9/4257/51733/4259/6240/2948/2944/2940/1571/2938/54490/6241/7083/1576/8824/10/7498/54578/7366/119391
hsa01230	Biosynthesis of amino acids	66	-0.467212	-1.78866	0.000473217	0.0028224	0.00154774	4640	tags=56%, list=29%, signal=40%	221823/7167/875/5214/27430/5232/5211/5832/4143/3420/6472/2027/2806/50/229/22934/8277/26227/5723/440/5091/6470/3419/5313/3418/3417/1491/29968/5831/2875/435/230/2805/5009/445/1373/84706
hsa01200	Carbon metabolism	107	-0.471016	-1.96442	2.65507e-06	4.57424e-05	2.50841e-05	4378	tags=54%, list=28%, signal=40%	6888/5226/221823/7167/6389/5214/5232/8802/5211/10873/189/3420/6472/2027/2806/1892/5160/8310/55753/2271/54363/283871/50/4329/4200/2539/2731/8801/4191/229/4199/22934/39/8277/132158/26227/5723/5091/6470/3419/5313/414328/3418/3417/35/55902/3099/84532/2203/29968/2875/230/275/80201/2805/1373/8789/84706
hsa00512	Mucin type O-glycan biosynthesis	32	-0.488529	-1.62462	0.00987098	0.0289202	0.0158592	2210	tags=47%, list=14%, signal=40%	55808/26290/2650/10610/79623/11227/51301/51809/9245/56913/10331/2591/11226/79695/192134
hsa00620	Pyruvate metabolism	45	-0.500358	-1.78173	0.00169959	0.00718562	0.00394043	3523	tags=49%, list=22%, signal=38%	3948/10327/5160/2271/4200/97/4191/4199/39/124/160287/31/5091/217/5313/224/55902/84532/5106/131/197257/126
hsa00020	Citrate cycle (TCA cycle)	29	-0.501392	-1.62581	0.0167847	0.0441425	0.0242067	4378	tags=48%, list=28%, signal=35%	6389/8802/3420/5160/55753/2271/50/8801/4191/5091/3419/3418/3417/5106
hsa03460	Fanconi anemia pathway	45	-0.520377	-1.85301	0.000780155	0.00391382	0.00214625	3000	tags=44%, list=19%, signal=36%	84464/9894/2178/79728/22909/6119/197342/146956/672/2177/641/116028/83990/2189/80010/55215/5888/2175/675/29089
hsa05033	Nicotine addiction	37	-0.521692	-1.77901	0.00346394	0.0121785	0.00667839	7319	tags=86%, list=46%, signal=47%	2559/774/2892/2567/200959/2893/2569/2566/2554/57084/116443/116444/2563/1137/2891/140679/2904/8973/1141/57030/2905/246213/2570/2902/55879/2560/2556/2906/2562/2557/2568/2561
hsa00790	Folate biosynthesis	23	-0.534803	-1.62062	0.0174752	0.0454592	0.0249288	2215	tags=39%, list=14%, signal=34%	5092/1719/10243/6697/55034/873/248/8644/57016
hsa00630	Glyoxylate and dicarboxylate metabolism	28	-0.546204	-1.7386	0.00739302	0.023295	0.0127744	4137	tags=54%, list=26%, signal=40%	112817/189/6472/54363/283871/50/2731/4191/39/132158/6470/55902/84532/125061/275
hsa04964	Proximal tubule bicarbonate reclamation	22	-0.555977	-1.66235	0.0186753	0.0476778	0.0261454	1032	tags=36%, list=7%, signal=34%	10991/8671/5106/481/1468/6550/762/760
hsa03410	Base excision repair	32	-0.561422	-1.86703	0.000708058	0.00363833	0.00199518	3386	tags=53%, list=21%, signal=42%	10038/10039/27343/27301/3980/5424/10714/142/3978/4595/5426/5425/2237/7374/5111/5427/55247
hsa00051	Fructose and mannose metabolism	28	-0.565389	-1.79967	0.00360828	0.0125538	0.00688423	2488	tags=54%, list=16%, signal=45%	29926/5207/229/5373/3099/55556/3795/2203/230/80201/2762/5208/6652/8789/57016
hsa04975	Fat digestion and absorption	37	-0.56708	-1.93378	0.000662378	0.0035683	0.00195677	2091	tags=41%, list=13%, signal=35%	39/1208/5319/64241/29881/337/8694/84647/338/80168/64240/1056/50487/4547/8513
hsa00591	Linoleic acid metabolism	23	-0.567325	-1.71917	0.00869467	0.0264002	0.0144772	1937	tags=48%, list=12%, signal=42%	5319/8398/1557/1558/1571/84647/1559/255189/1576/50487/1573
hsa03440	Homologous recombination	37	-0.596654	-2.03463	0.00018685	0.00132783	0.000728152	2945	tags=49%, list=19%, signal=40%	79728/5424/10714/5890/11073/7517/6119/5425/79184/7516/146956/672/641/83990/25788/5888/675/8438
hsa03430	Mismatch repair	22	-0.602949	-1.8028	0.0047542	0.0157218	0.00862148	3803	tags=59%, list=24%, signal=45%	5982/29935/5985/5424/10714/4436/5984/3978/6119/5425/5111/5983/9156
hsa04950	Maturity onset diabetes of the young	23	-0.604221	-1.83098	0.00320387	0.0117593	0.00644851	2834	tags=61%, list=18%, signal=50%	3175/3651/4825/222546/6928/5313/6927/3174/3172/3171/4760/3110/5080/3170
hsa00040	Pentose and glucuronate interconversions	20	-0.61394	-1.78329	0.0046535	0.0155427	0.00852326	1532	tags=45%, list=10%, signal=41%	51084/9942/27294/54490/51181/6652/54578/7366/57016
hsa00220	Arginine biosynthesis	21	-0.679156	-1.99618	0.000420143	0.00259866	0.00142504	713	tags=38%, list=4%, signal=36%	2875/435/2805/5009/4843/445/1373/84706
hsa03030	DNA replication	36	-0.68065	-2.3198	1.02772e-06	2.64044e-05	1.44796e-05	3803	tags=69%, list=24%, signal=53%	5982/5422/29935/5558/5985/5424/10714/4172/10535/5984/3978/4175/23649/6119/5557/5426/5425/2237/4173/5111/4176/1763/5983/4171/5427
hsa00910	Nitrogen metabolism	16	-0.700636	-1.93675	0.00130839	0.00575002	0.00315318	2345	tags=50%, list=15%, signal=43%	765/766/759/767/1373/762/760/768

## Sheet: Supplement Table S4
Supplement Table S4: Drug candidates with potential therapeutic effect for the low-risk group or the high-risk group.
Drug name	conMean	treatMean	logFC	P.Value	fdr	database
Cct128930	0.0400986	0.000553827	6.17797	0.00205884	0.0080301	PRISM
Chlorquinaldol	-0.0292843	-0.00526703	2.47506	0.00719859	0.0210734	PRISM
Flumethasone	0.0592792	0.0108468	2.45026	0.00317522	0.011109	PRISM
Imidapril	-0.0245938	-0.00642445	1.93665	0.00292236	0.0103648	PRISM
Betamethasone-Dipropionate	0.0612731	0.0174928	1.80849	4.62e-05	0.000562475	PRISM
Gsk429286A	-0.0316069	-0.00902513	1.80822	3.08e-06	9.95e-05	PRISM
Arcyriaflavin-A	0.0710166	0.0203858	1.80059	1.02e-06	4.96e-05	PRISM
Mrs-1220	0.0429067	0.0127014	1.75621	0.00328956	0.0113552	PRISM
Olaparib	-0.0126951	-0.00379412	1.74243	0.0494136	0.0996765	PRISM
Ciclesonide	0.0768069	0.0238368	1.68805	0.000115632	0.00101552	PRISM
Levobunolol	-0.0257385	-0.0100715	1.35365	9.35e-06	0.000198356	PRISM
Foscarnet	-0.037359	-0.0150515	1.31154	0.000110565	0.00100521	PRISM
Halobetasol-Propionate	0.0859659	0.0363052	1.24359	0.00134745	0.00570346	PRISM
Pd-173074	-0.0180075	-0.00767651	1.23008	8.43e-05	0.00084365	PRISM
Maxacalcitol	0.0652723	0.0309806	1.07511	7e-06	0.0001613	PRISM
Vincamine	0.0522262	0.0250389	1.0606	0.00498606	0.0157384	PRISM
Desonide	0.0715246	0.0365663	0.967926	0.00221547	0.00841226	PRISM
U-18666A	0.0369537	0.0193301	0.934871	0.00138202	0.00577408	PRISM
Idronoxil	-0.0686154	-0.0360678	0.927824	5.83e-05	0.000649322	PRISM
Sb-228357	0.047501	0.025825	0.879191	0.00136463	0.00571994	PRISM
Cx-4945	0.0480156	0.0270763	0.826473	3.97e-07	2.9e-05	PRISM
Prazosin	0.0275336	0.0156418	0.815788	1.4e-05	0.000244672	PRISM
Cgs-15943	0.152668	0.0893157	0.773414	0.00102961	0.00476426	PRISM
Methotrexate	10652.4	6261.99	0.766482	0.000236545	0.00201908	CTRP
Flumethasone-Pivalate	0.0716767	0.0424373	0.756171	4.31e-06	0.00012358	PRISM
Clobetasol-Propionate	0.143941	0.0856905	0.748272	0.00186579	0.00738878	PRISM
Tu-2100	0.0707818	0.0425361	0.734691	0.000148735	0.00121529	PRISM
Atenolol-(-)	0.0338445	0.0208606	0.698141	0.0181399	0.0447774	PRISM
Kenpaullone	0.102421	0.0656123	0.642468	0.000164805	0.00129734	PRISM
Su014813	-0.102571	-0.0657763	0.64098	1.49e-05	0.000250477	PRISM
Azd1480	-0.0396469	-0.0254375	0.64025	0.026389	0.0599793	PRISM
Piperine	0.117144	0.077148	0.602577	1.24e-08	8e-06	PRISM
Carboxypyridine-Disulfide	0.0368787	0.0243588	0.598344	0.010148	0.027408	PRISM
Brd-K97651142	106632	71180.1	0.5831	2.12e-06	0.000142059	CTRP
Lbh-589	233.648	159.686	0.549101	0.00208422	0.00946874	CTRP
Prednisolone-Hemisuccinate	0.0697318	0.0478673	0.542776	0.00129708	0.00558177	PRISM
2,3-Dcpe	-0.0606762	-0.0420531	0.52892	0.0224615	0.053207	PRISM
Lapatinib	29.7687	20.7414	0.521282	9.66e-05	0.0041052	GDSC
Efonidipine-Monoethanolate	-0.04775	-0.0334519	0.51341	0.00492985	0.0155991	PRISM
Dasatinib	26464.2	37433	-0.500268	0.000456781	0.00309844	CTRP
Foretinib	1.06706	1.51175	-0.502573	3.31e-06	8.03e-05	GDSC
Dienogest	-0.0466528	-0.0661257	-0.503246	0.000174708	0.00135872	PRISM
Parp-0108	1.21856	1.72815	-0.504058	0.00262429	0.0103042	GDSC
Sb-205384	-0.0605574	-0.0861069	-0.507826	0.00224261	0.00846552	PRISM
Sonidegib	-0.0208422	-0.0296377	-0.507926	0.00570723	0.0175848	PRISM
Azd4547	17.9306	25.6685	-0.517576	2.92e-05	0.000486519	GDSC
Cp-673451	0.0622342	0.0894294	-0.523041	0.0220347	0.0523881	PRISM
Deflazacort	-0.0948667	-0.136692	-0.526959	0.00104302	0.00477495	PRISM
Bx795	5.98397	8.69952	-0.539833	1.97e-06	6.57e-05	GDSC
Talazoparib	9.65627	14.1427	-0.550522	0.00200893	0.00851404	GDSC
Staurosporine	0.0450582	0.0660533	-0.551842	8.31e-07	7.06e-05	GDSC
Temsirolimus	0.125367	0.184818	-0.559947	0.000124566	0.00133037	GDSC
Canertinib	-0.103889	-0.1535	-0.563186	0.000207878	0.00151622	PRISM
Ercalcitriol	-0.0602106	-0.0892439	-0.567736	2.87e-05	0.000389888	PRISM
Az3146	-0.0908011	-0.135336	-0.575762	0.000104135	0.000981302	PRISM
Pi.103	140481	209756	-0.578336	0.000246898	0.00201908	CTRP
Methscopolamine	0.0368223	0.0553309	-0.587506	0.000444419	0.00250543	PRISM
Zm-306416	-0.0392986	-0.05931	-0.593797	0.00256194	0.00936959	PRISM
Nvp-Bhg712	-0.0187867	-0.028579	-0.605246	0.000132178	0.00113008	PRISM
Refametinib	5.6871	8.71452	-0.615729	0.0174377	0.0490091	GDSC
Ml162	12667.9	19433.5	-0.617367	8.05e-05	0.00105855	CTRP
Gsk2110183	-0.0895108	-0.137652	-0.62089	0.000112231	0.00101322	PRISM
Mifepristone	-0.0428594	-0.0659189	-0.621081	0.000649572	0.00332777	PRISM
Bleomycin	7.12686	11.0534	-0.633156	0.000185168	0.00170482	GDSC
Clomifene	-0.0469114	-0.073106	-0.64005	0.00205884	0.0080301	PRISM
Elesclomol	0.0386875	0.0602946	-0.640161	3.41e-07	1.82e-05	GDSC
Norfloxacin	-0.0443599	-0.0693318	-0.644261	0.00227005	0.00854414	PRISM
Ephb4-9721	7.90255	12.4084	-0.650923	5.92e-07	2.64e-05	GDSC
Parp-9482	0.794017	1.26027	-0.66649	0.00109827	0.00574977	GDSC
Tucatinib	-0.0544012	-0.0872351	-0.68127	0.000880716	0.00414965	PRISM
Pd0325901	0.488021	0.786686	-0.688844	0.00310101	0.0116615	GDSC
Otx015	-0.100004	-0.166036	-0.731432	4.46e-06	0.000125198	PRISM
(5Z)-7-Oxozeaenol	2.1453	3.5621	-0.731553	8.73e-06	0.000169424	GDSC
Butamben	-0.026581	-0.0442621	-0.735676	0.000456781	0.00255283	PRISM
Carboxyamidotriazole	-0.024406	-0.0407884	-0.740921	0.0335396	0.0727726	PRISM
1S,3R-Rsl-3	3244.9	5661.09	-0.802907	3.37e-05	0.000619474	CTRP
Zaleplon	-0.0189273	-0.0331128	-0.806923	5.15e-08	1.2e-05	PRISM
Bleomycin	10.1184	18.0118	-0.831958	0.000134148	0.0013776	GDSC
Kifunensine	0.0322163	0.057808	-0.843477	0.00104302	0.00477495	PRISM
Rociletinib	-0.0269004	-0.0488214	-0.859886	4.55e-05	0.000558995	PRISM
Pf-4981517	0.00683328	0.0125285	-0.874565	9.28e-08	1.2e-05	PRISM
Bibu-1361	-0.0361116	-0.0665636	-0.88227	0.00336787	0.0115024	PRISM
Bosentan	0.019711	0.0366151	-0.893436	0.000187873	0.00142673	PRISM
Atipamezole	-0.0188922	-0.0359326	-0.927504	0.0205958	0.0496067	PRISM
X12-O-Tetradecanoylphorbol-13-Acetate	-0.0494606	-0.0950522	-0.942439	0.00666654	0.0198307	PRISM
Ml210	30863.8	59798.4	-0.954192	3.16e-05	0.000611756	CTRP
Dasatinib	4.6514	9.18383	-0.981431	3.68e-07	6.25e-05	GDSC
Psi-7976	-0.00940288	-0.0192039	-1.03023	0.00218863	0.00833486	PRISM
Beclomethasone-Dipropionate	-0.0291677	-0.0613048	-1.07163	0.00117114	0.00521359	PRISM
Trametinib	0.554959	1.17195	-1.07846	0.0449475	0.102573	GDSC
Pf-573228	0.01124	0.0331784	-1.5616	0.0117469	0.0310762	PRISM
Bis(Maltolato)Oxovanadium(Iv)	0.0145378	0.0491397	-1.75707	0.000301079	0.00188686	PRISM
Ingenol-Mebutate	-0.0286424	-0.0971792	-1.7625	0.000751997	0.00369136	PRISM
Penicillamine-(D)	0.00388501	0.0158587	-2.02929	1.11e-05	0.00021005	PRISM
Gsk1904529A	-0.0092147	-0.0438644	-2.25104	0.00369834	0.0124337	PRISM
Pazopanib	0.00190597	0.0207764	-3.44635	0.000138172	0.00115831	PRISM
Gdc-0068	-0.00200259	-0.0368242	-4.20072	0.00168951	0.0068161	PRISM
Mk-2461	0.00154756	0.0465517	-4.91077	0.00903083	0.0250189	PRISM

## Sheet: Supplement Table S5
Supplement Table S5: Drug candidates and corresponding biomarkers for HP+ GC patients.
Drug name	Mutation	P-value	Effect
Zm-306416	TP53TG3F	0.0356069	effective
Zm-306416	TP53TG3E	0.0356069	effective
Zm-306416	TP53TG3D	0.0336593	effective
Zm-306416	TP53TG3C	0.0356069	effective
Zm-306416	TP53TG3B	0.0356069	effective
Zm-306416	TP53TG3	0.0356069	effective
Zm-306416	MIR4725	0.0408107	effective
Zm-306416	MIR4724	0.0204751	effective
Zm-306416	MIR365B	0.0408107	effective
Zm-306416	MIR193A	0.00474666	effective
Zm-306416	LOC390705	0.0495647	effective
Zm-306416	LOC102723753	0.0229368	effective
Zm-306416	HERC2P4	0.0229368	effective
Zaleplon	MIR4724	0.0354055	effective
Zaleplon	LOC102723753	0.0406583	effective
Zaleplon	HERC2P4	0.0406583	effective
Vincamine	ZNRD1ASP	0.0378906	ineffective
Vincamine	KDELR1	0.0178568	effective
Vincamine	KCNJ14	0.012519	effective
Vincamine	HLA-J	0.0378906	ineffective
Vincamine	GRWD1	0.00643397	effective
Vincamine	GRIN2D	0.0101959	effective
U-18666A	STRIP1	0.0450651	ineffective
U-18666A	MIR193A	0.0372802	effective
Tucatinib	TP53TG3F	0.0147403	effective
Tucatinib	TP53TG3E	0.0147403	effective
Tucatinib	TP53TG3D	0.0263644	effective
Tucatinib	TP53TG3C	0.0147403	effective
Tucatinib	TP53TG3B	0.0147403	effective
Tucatinib	TP53TG3	0.0147403	effective
Tucatinib	REREP3	0.00885702	effective
Tucatinib	OR4M2	0.0316323	effective
Tucatinib	MIR193A	0.0339557	effective
Tucatinib	LOC390705	0.0227468	effective
Tucatinib	LOC102723753	0.0169302	effective
Tucatinib	LOC101927079	0.0432857	effective
Tucatinib	HERC2P4	0.0169302	effective
Trametinib	TP53TG3F	0.0128219	effective
Trametinib	TP53TG3E	0.0128219	effective
Trametinib	TP53TG3D	0.0111218	effective
Trametinib	TP53TG3C	0.0128219	effective
Trametinib	TP53TG3B	0.0128219	effective
Trametinib	TP53TG3	0.0128219	effective
Trametinib	SLC6A10P	0.00310671	effective
Trametinib	SLC30A5	0.00158757	effective
Trametinib	SLC30A5	0.00255739	effective
Trametinib	MRPS36	0.00255739	effective
Trametinib	MIR4725	0.00513653	effective
Trametinib	MIR365B	0.00513653	effective
Trametinib	MIR193A	0.0120562	effective
Trametinib	LOC390705	0.0155615	effective
Trametinib	LOC102723753	0.00883776	effective
Trametinib	LOC101928885	0.00255739	effective
Trametinib	LINC00824	0.00278389	effective
Trametinib	HERC2P4	0.00883776	effective
Trametinib	FHOD3	0.0253853	effective
Trametinib	CENPH	0.00158757	effective
Trametinib	CDK7	0.00158757	effective
Trametinib	CCNB1	0.00158757	effective
Trametinib	ARNT	0.0206419	effective
Temsirolimus	ZNF385C	0.0141243	ineffective
Temsirolimus	TTC25	0.0141243	ineffective
Temsirolimus	REREP3	0.0331688	ineffective
Temsirolimus	P3H4	0.0141243	ineffective
Temsirolimus	OR51G1	0.0131627	ineffective
Temsirolimus	OR4M2	0.0276925	ineffective
Temsirolimus	NT5C3B	0.0141243	ineffective
Temsirolimus	NKIRAS2	0.0141243	ineffective
Temsirolimus	MIR6770-2	0.0238189	ineffective
Temsirolimus	MIR6770-1	0.0238189	ineffective
Temsirolimus	MIR6511A3	0.0238189	ineffective
Temsirolimus	MIR6511A2	0.0238189	ineffective
Temsirolimus	MIR6511A1	0.0238189	ineffective
Temsirolimus	MIR3670-3	0.0242551	ineffective
Temsirolimus	MIR3670-2	0.0242551	ineffective
Temsirolimus	MIR3670-1	0.0242551	ineffective
Temsirolimus	MIR3180-3	0.0238189	ineffective
Temsirolimus	MIR3180-2	0.0214293	ineffective
Temsirolimus	MIR3180-1	0.0214293	ineffective
Temsirolimus	MIR3179-4	0.0238189	ineffective
Temsirolimus	MIR3179-3	0.0272757	ineffective
Temsirolimus	MIR3179-2	0.0272757	ineffective
Temsirolimus	MIR3179-1	0.0272757	ineffective
Temsirolimus	LOC101927079	0.0487577	ineffective
Temsirolimus	LOC100288162	0.0238189	ineffective
Temsirolimus	LINC00824	0.00198323	effective
Temsirolimus	KLHL11	0.0141243	ineffective
Temsirolimus	KLHL10	0.0141243	ineffective
Temsirolimus	KAT2A	0.0222334	ineffective
Temsirolimus	JUP	0.0141243	ineffective
Temsirolimus	FKBP10	0.0141243	ineffective
Temsirolimus	DNAJC7	0.0141243	ineffective
Temsirolimus	DHX58	0.0222334	ineffective
Temsirolimus	CNP	0.0141243	ineffective
Temsirolimus	CHEK2P2	0.0250077	ineffective
Temsirolimus	ACLY	0.0141243	ineffective
Talazoparib	WNT2B	0.0450866	ineffective
Talazoparib	WEE2-AS1	0.0143064	effective
Talazoparib	SIRPD	0.0407041	ineffective
Talazoparib	MIR3180-2	0.0493016	ineffective
Talazoparib	MIR3180-1	0.0493016	ineffective
Talazoparib	LOC390705	0.0415566	ineffective
Talazoparib	KIAA1147	0.0143064	effective
Su014813	ZNF385C	0.0461959	ineffective
Su014813	TTC25	0.0461959	ineffective
Su014813	TP53TG3F	0.00989744	ineffective
Su014813	TP53TG3E	0.00989744	ineffective
Su014813	TP53TG3D	0.00688436	ineffective
Su014813	TP53TG3C	0.00989744	ineffective
Su014813	TP53TG3B	0.00989744	ineffective
Su014813	TP53TG3	0.00989744	ineffective
Su014813	RAB11FIP4	0.0340555	ineffective
Su014813	PABPC1P2	0.0293738	ineffective
Su014813	P3H4	0.0461959	ineffective
Su014813	NT5C3B	0.0461959	ineffective
Su014813	NKIRAS2	0.0461959	ineffective
Su014813	MIR4724	0.0266084	ineffective
Su014813	MIR193A	0.04103	ineffective
Su014813	LOC390705	0.0052366	ineffective
Su014813	LOC102723753	0.0129278	ineffective
Su014813	KLHL11	0.0461959	ineffective
Su014813	KLHL10	0.0461959	ineffective
Su014813	JUP	0.0461959	ineffective
Su014813	HERC2P4	0.0129278	ineffective
Su014813	FKBP10	0.0461959	ineffective
Su014813	DNAJC7	0.0461959	ineffective
Su014813	CNP	0.0461959	ineffective
Su014813	ACLY	0.0461959	ineffective
Staurosporine	LOC390705	0.0373088	ineffective
Staurosporine	EDC3	0.0196706	effective
Sonidegib	SIRPD	0.017179	ineffective
Sb-228357	HLA-DRB1	0.0146699	effective
Sb-228357	HLA-DQA1	0.0209472	effective
Sb-205384	FSTL5	0.0464616	ineffective
Rociletinib	TP53TG3F	0.0123436	effective
Rociletinib	TP53TG3E	0.0123436	effective
Rociletinib	TP53TG3D	0.030283	effective
Rociletinib	TP53TG3C	0.0123436	effective
Rociletinib	TP53TG3B	0.0123436	effective
Rociletinib	TP53TG3	0.0123436	effective
Rociletinib	LOC390705	0.0394952	effective
Rociletinib	LOC102723753	0.00851421	effective
Rociletinib	HLA-DRB5	0.0414412	effective
Rociletinib	HLA-A	0.0423051	effective
Rociletinib	HERC2P4	0.00851421	effective
Refametinib	TP53TG3F	0.0141052	effective
Refametinib	TP53TG3E	0.0141052	effective
Refametinib	TP53TG3D	0.0124047	effective
Refametinib	TP53TG3C	0.0141052	effective
Refametinib	TP53TG3B	0.0141052	effective
Refametinib	TP53TG3	0.0141052	effective
Refametinib	SLC6A10P	0.00368786	effective
Refametinib	SLC30A5	0.000930125	effective
Refametinib	MRPS36	0.000930125	effective
Refametinib	MIR4725	0.00630652	effective
Refametinib	MIR365B	0.00630652	effective
Refametinib	MIR193A	0.0156269	effective
Refametinib	LOC390705	0.01818	effective
Refametinib	LOC102723753	0.00921004	effective
Refametinib	LOC101928885	0.000930125	effective
Refametinib	LINC00824	0.002817	effective
Refametinib	HERC2P4	0.00921004	effective
Refametinib	FHOD3	0.0230209	effective
Refametinib	CENPH	0.000930125	effective
Refametinib	CDK7	0.000930125	effective
Refametinib	CCNB1	0.000930125	effective
Refametinib	ARNT	0.0172809	effective
Psi-7976	ZNRD1ASP	0.0141749	ineffective
Psi-7976	SPAG11A	0.0307801	ineffective
Psi-7976	LINC00824	0.0283776	effective
Psi-7976	HLA-J	0.0141749	ineffective
Psi-7976	HLA-A	0.00574161	ineffective
Psi-7976	HCG9	0.00622926	ineffective
Psi-7976	CTSB	0.00667043	ineffective
Psi-7976	CHEK2P2	0.0344453	ineffective
Prednisolone-Hemisuccinate	HLA-DRB5	0.0340313	effective
Prednisolone-Hemisuccinate	HCG9	0.040469	effective
Prazosin	TP53TG3F	0.0290151	effective
Prazosin	TP53TG3E	0.0290151	effective
Prazosin	TP53TG3C	0.0290151	effective
Prazosin	TP53TG3B	0.0290151	effective
Prazosin	TP53TG3	0.0290151	effective
Prazosin	SLC6A10P	0.0271445	effective
Prazosin	SENP5	0.0408785	effective
Prazosin	MIR3670-3	0.0480529	effective
Prazosin	MIR3670-2	0.0480529	effective
Prazosin	MIR3670-1	0.0480529	effective
Prazosin	MIR3179-3	0.0415676	effective
Prazosin	MIR3179-2	0.0415676	effective
Prazosin	MIR3179-1	0.0415676	effective
Prazosin	MIR193A	0.0410504	effective
Prazosin	LOC102723753	0.0261196	effective
Prazosin	KCNJ14	0.012909	effective
Prazosin	HERC2P4	0.0261196	effective
Prazosin	HCG9	0.022476	effective
Prazosin	GRWD1	0.0142447	effective
Prazosin	GRIN2D	0.0236439	effective
Prazosin	CTSB	0.0204163	effective
Piperine	TP53TG3F	0.00502557	effective
Piperine	TP53TG3E	0.00502557	effective
Piperine	TP53TG3D	0.00950009	effective
Piperine	TP53TG3C	0.00502557	effective
Piperine	TP53TG3B	0.00502557	effective
Piperine	TP53TG3	0.00502557	effective
Piperine	SLC6A10P	0.0438025	effective
Piperine	REREP3	0.0442254	effective
Piperine	PABPC1P2	0.0447919	effective
Piperine	MIR193A	0.0165926	effective
Piperine	LOC390705	0.0122514	effective
Piperine	LOC102723753	0.00360508	effective
Piperine	HERC2P4	0.00360508	effective
Pi-828	MIR193A	0.0459452	effective
Pi-103	TP53TG3F	0.0174541	ineffective
Pi-103	TP53TG3E	0.0174541	ineffective
Pi-103	TP53TG3D	0.0162003	ineffective
Pi-103	TP53TG3C	0.0174541	ineffective
Pi-103	TP53TG3B	0.0174541	ineffective
Pi-103	TP53TG3	0.0174541	ineffective
Pi-103	RAB11FIP4	0.0385384	ineffective
Pi-103	OR52E4	0.0197244	effective
Pi-103	MIR6770-2	0.0211014	effective
Pi-103	MIR6770-1	0.0211014	effective
Pi-103	MIR6511A3	0.0211014	effective
Pi-103	MIR6511A2	0.0211014	effective
Pi-103	MIR6511A1	0.0211014	effective
Pi-103	MIR4724	0.0451151	ineffective
Pi-103	MIR3670-3	0.0200501	effective
Pi-103	MIR3670-2	0.0200501	effective
Pi-103	MIR3670-1	0.0200501	effective
Pi-103	MIR3180-3	0.0211014	effective
Pi-103	MIR3180-2	0.0133064	effective
Pi-103	MIR3180-1	0.0133064	effective
Pi-103	MIR3179-4	0.0211014	effective
Pi-103	MIR3179-3	0.0313602	effective
Pi-103	MIR3179-2	0.0313602	effective
Pi-103	MIR3179-1	0.0313602	effective
Pi-103	LRRTM3	0.0398665	ineffective
Pi-103	LOC390705	0.0177433	ineffective
Pi-103	LOC102723753	0.0157206	ineffective
Pi-103	LOC101928961	0.0398665	ineffective
Pi-103	LOC100288162	0.0211014	effective
Pi-103	HERC2P4	0.0157206	ineffective
Pi-103	CTNNA3	0.0304108	ineffective
Pf-573228	ZNRD1ASP	0.0455878	ineffective
Pf-573228	TP53TG3F	0.00266108	ineffective
Pf-573228	TP53TG3E	0.00266108	ineffective
Pf-573228	TP53TG3D	0.000891061	ineffective
Pf-573228	TP53TG3C	0.00266108	ineffective
Pf-573228	TP53TG3B	0.00266108	ineffective
Pf-573228	TP53TG3	0.00266108	ineffective
Pf-573228	SLC6A10P	0.0356594	ineffective
Pf-573228	SLC30A5	0.0374582	effective
Pf-573228	MRPS36	0.0374582	effective
Pf-573228	LOC390705	0.0016263	ineffective
Pf-573228	LOC102723753	0.001469	ineffective
Pf-573228	LOC101928885	0.0374582	effective
Pf-573228	HLA-J	0.0455878	ineffective
Pf-573228	HLA-DRB6	0.0076773	effective
Pf-573228	HLA-DRB5	0.0013085	effective
Pf-573228	HLA-DRB1	0.00485774	effective
Pf-573228	HLA-DQA1	0.0082496	effective
Pf-573228	HLA-A	0.0312994	ineffective
Pf-573228	HERC2P4	0.001469	ineffective
Pf-573228	CENPH	0.0374582	effective
Pf-573228	CDK7	0.0374582	effective
Pf-573228	CCNB1	0.0374582	effective
Pf-4981517	TP53TG3F	0.00801998	ineffective
Pf-4981517	TP53TG3E	0.00801998	ineffective
Pf-4981517	TP53TG3D	0.00518567	ineffective
Pf-4981517	TP53TG3C	0.00801998	ineffective
Pf-4981517	TP53TG3B	0.00801998	ineffective
Pf-4981517	TP53TG3	0.00801998	ineffective
Pf-4981517	OR51G1	0.030764	ineffective
Pf-4981517	MIR4724	0.0411711	ineffective
Pf-4981517	MIR3180-2	0.0481582	ineffective
Pf-4981517	MIR3180-1	0.0481582	ineffective
Pf-4981517	LOC390705	0.00553372	ineffective
Pf-4981517	LOC102723753	0.00750606	ineffective
Pf-4981517	HERC2P4	0.00750606	ineffective
Pf-4981517	DEFB109P1B	0.0369896	ineffective
Penicillamine-(D)	MIR4724	0.0272316	ineffective
Penicillamine-(D)	MIR193A	0.023176	ineffective
Penicillamine-(D)	ARNT	0.0188436	effective
Pd-173074	TP53TG3F	0.00162282	ineffective
Pd-173074	TP53TG3E	0.00162282	ineffective
Pd-173074	TP53TG3D	0.000859749	ineffective
Pd-173074	TP53TG3C	0.00162282	ineffective
Pd-173074	TP53TG3B	0.00162282	ineffective
Pd-173074	TP53TG3	0.00162282	ineffective
Pd-173074	SLC6A10P	0.01957	ineffective
Pd-173074	PABPC1P2	0.044588	ineffective
Pd-173074	MIR193A	0.0224521	ineffective
Pd-173074	LOC390705	0.00186912	ineffective
Pd-173074	LOC102723753	0.000704892	ineffective
Pd-173074	HERC2P4	0.000704892	ineffective
Pd0325901	TP53TG3F	0.0158343	effective
Pd0325901	TP53TG3E	0.0158343	effective
Pd0325901	TP53TG3D	0.0136086	effective
Pd0325901	TP53TG3C	0.0158343	effective
Pd0325901	TP53TG3B	0.0158343	effective
Pd0325901	TP53TG3	0.0158343	effective
Pd0325901	SLC6A10P	0.00467925	effective
Pd0325901	SLC30A5	0.00166381	effective
Pd0325901	MRPS36	0.00166381	effective
Pd0325901	MIR4725	0.00619098	effective
Pd0325901	MIR365B	0.00619098	effective
Pd0325901	MIR193A	0.0153117	effective
Pd0325901	LOC390705	0.0196736	effective
Pd0325901	LOC102723753	0.0105241	effective
Pd0325901	LOC101928885	0.00166381	effective
Pd0325901	LINC00824	0.00160423	effective
Pd0325901	HERC2P4	0.0105241	effective
Pd0325901	FHOD3	0.0322583	effective
Pd0325901	CENPH	0.00166381	effective
Pd0325901	CDK7	0.00166381	effective
Pd0325901	CCNB1	0.00166381	effective
Pd0325901	ARNT	0.0179825	effective
Pazopanib	ZNRD1ASP	0.0324811	ineffective
Pazopanib	TP53TG3F	0.00365115	ineffective
Pazopanib	TP53TG3E	0.00365115	ineffective
Pazopanib	TP53TG3D	0.00200814	ineffective
Pazopanib	TP53TG3C	0.00365115	ineffective
Pazopanib	TP53TG3B	0.00365115	ineffective
Pazopanib	TP53TG3	0.00365115	ineffective
Pazopanib	SLC6A10P	0.0150689	ineffective
Pazopanib	LOC390705	0.00256904	ineffective
Pazopanib	LOC102723753	0.0359604	ineffective
Pazopanib	HLA-J	0.0324811	ineffective
Pazopanib	HLA-A	0.0270895	ineffective
Pazopanib	HERC2P4	0.0359604	ineffective
Otx015	WEE2-AS1	0.0222524	effective
Otx015	TP53TG3F	0.0310691	ineffective
Otx015	TP53TG3E	0.0310691	ineffective
Otx015	TP53TG3D	0.0207164	ineffective
Otx015	TP53TG3C	0.0310691	ineffective
Otx015	TP53TG3B	0.0310691	ineffective
Otx015	TP53TG3	0.0310691	ineffective
Otx015	NCBP2	0.034668	effective
Otx015	LOC390705	0.0144722	ineffective
Otx015	LOC102723753	0.0437538	ineffective
Otx015	KIAA1147	0.0222524	effective
Otx015	KDELR1	0.0414705	effective
Otx015	KCNJ14	0.0424212	effective
Otx015	HLA-DRB5	0.0133289	effective
Otx015	HERC2P4	0.0437538	ineffective
Otx015	GRWD1	0.022546	effective
Otx015	GRIN2D	0.0162084	effective
Olaparib	TP53TG3F	0.00701859	ineffective
Olaparib	TP53TG3E	0.00701859	ineffective
Olaparib	TP53TG3D	0.00103402	ineffective
Olaparib	TP53TG3C	0.00701859	ineffective
Olaparib	TP53TG3B	0.00701859	ineffective
Olaparib	TP53TG3	0.00701859	ineffective
Olaparib	SLC6A10P	0.024468	ineffective
Olaparib	RAB11FIP4	0.0383105	ineffective
Olaparib	MIR4725	0.0269203	ineffective
Olaparib	MIR4724	0.0126925	ineffective
Olaparib	MIR365B	0.0269203	ineffective
Olaparib	MIR193A	0.00423625	ineffective
Olaparib	LOC390705	0.00162237	ineffective
Olaparib	LOC102723753	0.00483206	ineffective
Olaparib	LINC00824	0.0215258	ineffective
Olaparib	HERC2P4	0.00483206	ineffective
Olaparib	FHOD3	0.0246757	ineffective
Nvp-Bhg712	TP53TG3F	0.0373342	effective
Nvp-Bhg712	TP53TG3F	0.0314017	ineffective
Nvp-Bhg712	TP53TG3E	0.0314017	ineffective
Nvp-Bhg712	TP53TG3D	0.0211082	ineffective
Nvp-Bhg712	TP53TG3C	0.0314017	ineffective
Nvp-Bhg712	TP53TG3B	0.0314017	ineffective
Nvp-Bhg712	TP53TG3	0.0314017	ineffective
Nvp-Bhg712	OR51G1	0.0487367	ineffective
Nvp-Bhg712	OR4M2	0.00803399	ineffective
Nvp-Bhg712	LOC390705	0.0131417	ineffective
Nvp-Bhg712	LOC102723753	0.0489755	ineffective
Nvp-Bhg712	LOC101927079	0.0166153	ineffective
Nvp-Bhg712	IGHV1OR15-3	0.0137764	ineffective
Nvp-Bhg712	IGHV1OR15-1	0.0137764	ineffective
Nvp-Bhg712	HLA-DRB1	0.0087501	effective
Nvp-Bhg712	HLA-DQA1	0.0418446	effective
Nvp-Bhg712	HERC2P4	0.0230555	effective
Norfloxacin	KCNJ14	0.0341366	effective
Norfloxacin	HLA-DRB5	0.0102703	effective
Norfloxacin	GRWD1	0.0327676	effective
Norfloxacin	GRIN2D	0.0325188	effective
Mrs-1220	MIR4725	0.0428559	effective
Mrs-1220	MIR365B	0.0428559	effective
Mrs-1220	MIR193A	0.0127756	effective
Mrs-1220	LINC01296	0.0209584	ineffective
Mrs-1220	EDC3	0.0200778	ineffective
Mrs-1220	DUXAP10	0.0209584	ineffective
Mrs-1220	BRD9	0.0109832	ineffective
Mrs-1220	BMS1P22	0.0209584	ineffective
Mrs-1220	BMS1P17	0.0209584	ineffective
Ml210	TP53TG3F	0.0319088	ineffective
Ml210	TP53TG3E	0.0319088	ineffective
Ml210	TP53TG3C	0.0319088	ineffective
Ml210	TP53TG3B	0.0319088	ineffective
Ml210	TP53TG3	0.0319088	ineffective
Ml210	LOC390705	0.0428264	ineffective
Ml210	LOC102723753	0.0385618	ineffective
Ml210	HERC2P4	0.0385618	ineffective
Ml162	TP53TG3F	0.003842	ineffective
Ml162	TP53TG3E	0.003842	ineffective
Ml162	TP53TG3D	0.010879	ineffective
Ml162	TP53TG3C	0.003842	ineffective
Ml162	TP53TG3B	0.003842	ineffective
Ml162	TP53TG3	0.003842	ineffective
Ml162	SLC6A10P	0.0221189	ineffective
Ml162	MIR4725	0.0336925	ineffective
Ml162	MIR365B	0.0336925	ineffective
Ml162	MIR193A	0.0123098	ineffective
Ml162	LOC390705	0.00981247	ineffective
Ml162	LOC102723753	0.00414512	ineffective
Ml162	HERC2P4	0.00414512	ineffective
Mk-2461	ZNRD1ASP	0.0143933	ineffective
Mk-2461	TP53TG3F	0.00849482	ineffective
Mk-2461	TP53TG3E	0.00849482	ineffective
Mk-2461	TP53TG3D	0.0061987	ineffective
Mk-2461	TP53TG3C	0.00849482	ineffective
Mk-2461	TP53TG3B	0.00849482	ineffective
Mk-2461	TP53TG3	0.00849482	ineffective
Mk-2461	SPAG11A	0.0117823	ineffective
Mk-2461	LOC390705	0.00723132	ineffective
Mk-2461	LOC102723753	0.00721289	ineffective
Mk-2461	HLA-J	0.0143933	ineffective
Mk-2461	HLA-A	0.0273959	ineffective
Mk-2461	HERC2P4	0.00721289	ineffective
Mk-2461	HCG9	0.0209329	ineffective
Mk-2461	EDC3	0.0335877	effective
Mk-2461	DEFB109P1B	0.0172811	ineffective
Mifepristone	LOC102723753	0.0420831	effective
Mifepristone	HERC2P4	0.0420831	effective
Mifepristone	GALNTL6	0.0403694	effective
Methscopolamine	ZNRD1ASP	0.0291226	ineffective
Methscopolamine	TP53TG3F	0.0147017	ineffective
Methscopolamine	TP53TG3E	0.0147017	ineffective
Methscopolamine	TP53TG3D	0.0276742	ineffective
Methscopolamine	TP53TG3C	0.0147017	ineffective
Methscopolamine	TP53TG3B	0.0147017	ineffective
Methscopolamine	TP53TG3	0.0147017	ineffective
Methscopolamine	REREP3	0.00962138	ineffective
Methscopolamine	LOC390705	0.0258278	ineffective
Methscopolamine	LOC102723753	0.0154547	ineffective
Methscopolamine	HLA-J	0.0291226	ineffective
Methscopolamine	HLA-DRB5	0.0235741	ineffective
Methscopolamine	HLA-A	0.0172786	ineffective
Methscopolamine	HERC2P4	0.0154547	ineffective
Methscopolamine	HCG9	0.00895014	ineffective
Methscopolamine	DEFB109P1B	0.0388457	ineffective
Methotrexate	TP53TG3F	0.0320677	effective
Methotrexate	TP53TG3E	0.0320677	effective
Methotrexate	TP53TG3D	0.0475939	effective
Methotrexate	TP53TG3C	0.0320677	effective
Methotrexate	TP53TG3B	0.0320677	effective
Methotrexate	TP53TG3	0.0320677	effective
Methotrexate	LOC102723753	0.022909	effective
Methotrexate	HERC2P4	0.022909	effective
Maxacalcitol	TP53TG3F	0.00427491	effective
Maxacalcitol	TP53TG3E	0.00427491	effective
Maxacalcitol	TP53TG3D	0.00713772	effective
Maxacalcitol	TP53TG3C	0.00427491	effective
Maxacalcitol	TP53TG3B	0.00427491	effective
Maxacalcitol	TP53TG3	0.00427491	effective
Maxacalcitol	SLC6A10P	0.0448794	effective
Maxacalcitol	REREP3	0.00952412	effective
Maxacalcitol	OR4M2	0.00598146	effective
Maxacalcitol	MIR6770-2	0.0172764	effective
Maxacalcitol	MIR6770-1	0.0172764	effective
Maxacalcitol	MIR6511A3	0.0172764	effective
Maxacalcitol	MIR6511A2	0.0172764	effective
Maxacalcitol	MIR6511A1	0.0172764	effective
Maxacalcitol	MIR3670-3	0.0331479	effective
Maxacalcitol	MIR3670-2	0.0331479	effective
Maxacalcitol	MIR3670-1	0.0331479	effective
Maxacalcitol	MIR3180-3	0.0172764	effective
Maxacalcitol	MIR3180-2	0.0186805	effective
Maxacalcitol	MIR3180-1	0.0186805	effective
Maxacalcitol	MIR3179-4	0.0172764	effective
Maxacalcitol	MIR3179-3	0.0319664	effective
Maxacalcitol	MIR3179-2	0.0319664	effective
Maxacalcitol	MIR3179-1	0.0319664	effective
Maxacalcitol	LOC390705	0.00778967	effective
Maxacalcitol	LOC102723753	0.0037599	effective
Maxacalcitol	LOC101927079	0.00982313	effective
Maxacalcitol	LOC100288162	0.0172764	effective
Maxacalcitol	HLA-DRB5	0.0223131	effective
Maxacalcitol	HERC2P4	0.0037599	effective
Maxacalcitol	HCG9	0.0182437	effective
Maxacalcitol	DEFB109P1B	0.0231861	effective
Levobunolol	EDC3	0.0485292	effective
Levobunolol	ARNT	0.0335201	effective
Lbh-589	HLA-DRB5	0.0145708	effective
Lbh-589	HLA-DRB1	0.0178457	effective
Lbh-589	HLA-DQA1	0.0392403	effective
Lapatinib	ZNRD1ASP	0.033846	effective
Lapatinib	TP53TG3F	0.0103251	effective
Lapatinib	TP53TG3E	0.0103251	effective
Lapatinib	TP53TG3D	0.0364225	effective
Lapatinib	TP53TG3C	0.0103251	effective
Lapatinib	TP53TG3B	0.0103251	effective
Lapatinib	TP53TG3	0.0103251	effective
Lapatinib	REREP3	0.019129	effective
Lapatinib	MIR6770-2	0.0377647	effective
Lapatinib	MIR6770-1	0.0377647	effective
Lapatinib	MIR6511A3	0.0377647	effective
Lapatinib	MIR6511A2	0.0377647	effective
Lapatinib	MIR6511A1	0.0377647	effective
Lapatinib	MIR3670-3	0.0449091	effective
Lapatinib	MIR3670-2	0.0449091	effective
Lapatinib	MIR3670-1	0.0449091	effective
Lapatinib	MIR3180-3	0.0377647	effective
Lapatinib	MIR3180-2	0.0439398	effective
Lapatinib	MIR3180-1	0.0439398	effective
Lapatinib	MIR3179-4	0.0377647	effective
Lapatinib	MIR3179-3	0.0392986	effective
Lapatinib	MIR3179-2	0.0392986	effective
Lapatinib	MIR3179-1	0.0392986	effective
Lapatinib	LOC390705	0.0273484	effective
Lapatinib	LOC102723753	0.0138995	effective
Lapatinib	LOC100288162	0.0377647	effective
Lapatinib	KCNJ14	0.0349239	effective
Lapatinib	HLA-J	0.033846	effective
Lapatinib	HLA-DRB5	0.0129638	effective
Lapatinib	HLA-A	0.00452682	effective
Lapatinib	HERC2P4	0.0138995	effective
Lapatinib	HCG9	0.0210838	effective
Lapatinib	GRWD1	0.0430088	effective
Kifunensine	TP53TG3F	0.0289856	ineffective
Kifunensine	TP53TG3E	0.0289856	ineffective
Kifunensine	TP53TG3D	0.0346992	ineffective
Kifunensine	TP53TG3C	0.0289856	ineffective
Kifunensine	TP53TG3B	0.0289856	ineffective
Kifunensine	TP53TG3	0.0289856	ineffective
Kifunensine	SPAG11A	0.0233145	ineffective
Kifunensine	SIRPD	0.0472051	ineffective
Kifunensine	OR51G1	0.0184114	ineffective
Kifunensine	MIR3670-3	0.0325291	ineffective
Kifunensine	MIR3670-2	0.0325291	ineffective
Kifunensine	MIR3670-1	0.0325291	ineffective
Kifunensine	MIR193A	0.0300151	ineffective
Kifunensine	LOC390705	0.0356266	ineffective
Kifunensine	LOC102723753	0.0277744	ineffective
Kifunensine	HERC2P4	0.0277744	ineffective
Kifunensine	DEFB109P1B	0.0118943	ineffective
Kenpaullone	TP53TG3F	0.0215967	effective
Kenpaullone	TP53TG3E	0.0215967	effective
Kenpaullone	TP53TG3D	0.043004	effective
Kenpaullone	TP53TG3C	0.0215967	effective
Kenpaullone	TP53TG3B	0.0215967	effective
Kenpaullone	TP53TG3	0.0215967	effective
Kenpaullone	MIR193A	0.0146581	effective
Kenpaullone	LOC102723753	0.0117836	effective
Kenpaullone	KCNJ14	0.0430232	effective
Kenpaullone	HLA-DRB5	0.0122441	effective
Kenpaullone	HERC2P4	0.0117836	effective
Kenpaullone	GRWD1	0.0219143	effective
Ingenol-Mebutate	TP53TG3F	0.0353248	effective
Ingenol-Mebutate	TP53TG3E	0.0353248	effective
Ingenol-Mebutate	TP53TG3D	0.0213607	effective
Ingenol-Mebutate	TP53TG3C	0.0353248	effective
Ingenol-Mebutate	TP53TG3B	0.0353248	effective
Ingenol-Mebutate	TP53TG3	0.0353248	effective
Ingenol-Mebutate	RAB11FIP4	0.0358833	effective
Ingenol-Mebutate	MIR4724	0.0202138	effective
Ingenol-Mebutate	MIR193A	0.0375768	effective
Ingenol-Mebutate	LOC390705	0.0460877	effective
Ingenol-Mebutate	LOC102723753	0.0151702	effective
Ingenol-Mebutate	HERC2P4	0.0151702	effective
Imidapril	HLA-DRB5	0.0381601	ineffective
Imidapril	HLA-A	0.0450211	ineffective
Imidapril	HCG9	0.0131759	ineffective
Idronoxil	TP53TG3F	0.00867231	ineffective
Idronoxil	TP53TG3E	0.00867231	ineffective
Idronoxil	TP53TG3D	0.0062628	ineffective
Idronoxil	TP53TG3C	0.00867231	ineffective
Idronoxil	TP53TG3B	0.00867231	ineffective
Idronoxil	TP53TG3	0.00867231	ineffective
Idronoxil	MIR4724	0.0309264	ineffective
Idronoxil	LOC390705	0.0129308	ineffective
Idronoxil	LOC102723753	0.00385686	ineffective
Idronoxil	HERC2P4	0.00385686	ineffective
Halobetasol-Propionate	TP53TG3F	0.0064206	effective
Halobetasol-Propionate	TP53TG3E	0.0064206	effective
Halobetasol-Propionate	TP53TG3D	0.0101311	effective
Halobetasol-Propionate	TP53TG3C	0.0064206	effective
Halobetasol-Propionate	TP53TG3B	0.0064206	effective
Halobetasol-Propionate	TP53TG3	0.0064206	effective
Halobetasol-Propionate	SLC6A10P	0.0303535	effective
Halobetasol-Propionate	OR4M2	0.049893	effective
Halobetasol-Propionate	MIR193A	0.0264172	effective
Halobetasol-Propionate	LOC390705	0.0162073	effective
Halobetasol-Propionate	LOC102723753	0.00357784	effective
Halobetasol-Propionate	HERC2P4	0.00357784	effective
Gsk429286A	TP53TG3F	0.0412397	ineffective
Gsk429286A	TP53TG3E	0.041641	ineffective
Gsk429286A	TP53TG3D	0.0322032	ineffective
Gsk429286A	TP53TG3C	0.041641	ineffective
Gsk429286A	TP53TG3B	0.041641	ineffective
Gsk429286A	TP53TG3	0.041641	ineffective
Gsk429286A	RAB11FIP4	0.0137494	ineffective
Gsk429286A	MIR4724	0.0102359	ineffective
Gsk429286A	MIR193A	0.046746	ineffective
Gsk429286A	LOC390705	0.0270764	ineffective
Gsk429286A	LOC102723753	0.0493998	ineffective
Gsk429286A	HERC2P4	0.0254706	ineffective
Gsk2110183	REREP3	0.0217896	effective
Gsk2110183	MIR193A	0.0474722	effective
Gsk2110183	KCNJ14	0.0318912	effective
Gsk2110183	GRWD1	0.0301615	effective
Gsk2110183	BRD9	0.0423276	ineffective
Gsk1904529A	LOC102723753	0.0390305	effective
Gsk1904529A	KDELR1	0.00656163	effective
Gsk1904529A	HLA-DRB6	0.0412031	effective
Gsk1904529A	HLA-DRB5	0.0150128	effective
Gsk1904529A	HERC2P4	0.0390305	effective
Gsk1904529A	GRWD1	0.0106428	effective
Gsk1904529A	GRIN2D	0.0116522	effective
Gsk1904529A	CTSB	0.042534	effective
Gdc-0068	PABPC1P2	0.0463373	effective
Gdc-0068	GRWD1	0.0420846	effective
Gdc-0068	BRD9	0.0365619	ineffective
Foscarnet	ZNF385C	0.0326997	ineffective
Foscarnet	TTC25	0.0326997	ineffective
Foscarnet	PABPC1P2	0.022371	ineffective
Foscarnet	P3H4	0.0326997	ineffective
Foscarnet	NT5C3B	0.0326997	ineffective
Foscarnet	NKIRAS2	0.0326997	ineffective
Foscarnet	LOC101927079	0.0397204	ineffective
Foscarnet	KLHL11	0.0326997	ineffective
Foscarnet	KLHL10	0.0326997	ineffective
Foscarnet	KCNJ14	0.0294706	ineffective
Foscarnet	JUP	0.0326997	ineffective
Foscarnet	FKBP10	0.0326997	ineffective
Foscarnet	DNAJC7	0.0326997	ineffective
Foscarnet	CNP	0.0326997	ineffective
Foscarnet	ARNT	0.0274994	effective
Foscarnet	ACLY	0.0326997	ineffective
Foretinib	TP53TG3F	0.0153728	ineffective
Foretinib	TP53TG3E	0.0153728	ineffective
Foretinib	TP53TG3D	0.0166112	ineffective
Foretinib	TP53TG3C	0.0153728	ineffective
Foretinib	TP53TG3B	0.0237336	ineffective
Foretinib	TP53TG3B	0.0153728	ineffective
Foretinib	TP53TG3	0.0237336	ineffective
Foretinib	TP53TG3	0.0153728	ineffective
Foretinib	SLC6A10P	0.0267256	ineffective
Foretinib	SLC2A9	0.0493207	ineffective
Foretinib	MIR3180-2	0.0365511	ineffective
Foretinib	MIR3180-1	0.0365511	ineffective
Foretinib	LOC390705	0.0117497	ineffective
Foretinib	LOC102723753	0.0329796	ineffective
Foretinib	LOC102723753	0.0216263	ineffective
Foretinib	HERC2P4	0.0216263	ineffective
Flumethasone-Pivalate	TP53TG3F	0.00302857	effective
Flumethasone-Pivalate	TP53TG3E	0.00302857	effective
Flumethasone-Pivalate	TP53TG3D	0.00531959	effective
Flumethasone-Pivalate	TP53TG3C	0.00302857	effective
Flumethasone-Pivalate	TP53TG3B	0.00302857	effective
Flumethasone-Pivalate	TP53TG3	0.00302857	effective
Flumethasone-Pivalate	SLC6A10P	0.0367203	effective
Flumethasone-Pivalate	PABPC1P2	0.0325144	effective
Flumethasone-Pivalate	MIR4725	0.0220713	effective
Flumethasone-Pivalate	MIR4724	0.0487353	effective
Flumethasone-Pivalate	MIR365B	0.0220713	effective
Flumethasone-Pivalate	MIR193A	0.00289683	effective
Flumethasone-Pivalate	LOC390705	0.00889011	effective
Flumethasone-Pivalate	LOC102723753	0.00158913	effective
Flumethasone-Pivalate	HERC2P4	0.00158913	effective
Flumethasone	TP53TG3F	0.0266402	effective
Flumethasone	TP53TG3E	0.0266402	effective
Flumethasone	TP53TG3C	0.0266402	effective
Flumethasone	TP53TG3B	0.0266402	effective
Flumethasone	TP53TG3	0.0266402	effective
Flumethasone	MIR193A	0.0450457	effective
Flumethasone	LOC102723753	0.0197432	effective
Flumethasone	HLA-DRB5	0.0289095	effective
Flumethasone	HERC2P4	0.0197432	effective
Flumethasone	HCG9	0.0419733	effective
Ercalcitriol	MIR4724	0.0492624	effective
Ercalcitriol	LOC102723753	0.0302049	effective
Ercalcitriol	HERC2P4	0.0302049	effective
Ercalcitriol	GALNTL6	0.0447895	effective
Ephb4	ARNT	0.0153749	effective
Elesclomol	LRRTM3	0.0138074	effective
Elesclomol	LOC102723753	0.0410121	ineffective
Elesclomol	LOC101928961	0.0138074	effective
Elesclomol	HERC2P4	0.0410121	ineffective
Elesclomol	HCG9	0.0413849	ineffective
Elesclomol	CTNNA3	0.00843602	effective
Efonidipine-Monoethanolate	ZNF385C	0.0380178	ineffective
Efonidipine-Monoethanolate	TTC25	0.0380178	ineffective
Efonidipine-Monoethanolate	P3H4	0.0380178	ineffective
Efonidipine-Monoethanolate	OR4M2	0.0109217	ineffective
Efonidipine-Monoethanolate	NT5C3B	0.0380178	ineffective
Efonidipine-Monoethanolate	NKIRAS2	0.0380178	ineffective
Efonidipine-Monoethanolate	MIR193A	0.0336774	ineffective
Efonidipine-Monoethanolate	LOC101927079	0.0201044	ineffective
Efonidipine-Monoethanolate	KLHL11	0.0380178	ineffective
Efonidipine-Monoethanolate	KLHL10	0.0380178	ineffective
Efonidipine-Monoethanolate	KAT2A	0.0492622	ineffective
Efonidipine-Monoethanolate	JUP	0.0380178	ineffective
Efonidipine-Monoethanolate	FKBP10	0.0380178	ineffective
Efonidipine-Monoethanolate	DNAJC7	0.0380178	ineffective
Efonidipine-Monoethanolate	DHX58	0.0492622	ineffective
Efonidipine-Monoethanolate	CNP	0.0380178	ineffective
Efonidipine-Monoethanolate	ACLY	0.0380178	ineffective
Desonide	TP53TG3F	0.0138205	effective
Desonide	TP53TG3E	0.0138205	effective
Desonide	TP53TG3D	0.0168444	effective
Desonide	TP53TG3C	0.0138205	effective
Desonide	TP53TG3B	0.0138205	effective
Desonide	TP53TG3	0.0138205	effective
Desonide	MIR4725	0.00461896	effective
Desonide	MIR4724	0.0442187	effective
Desonide	MIR365B	0.00461896	effective
Desonide	MIR193A	0.000141213	effective
Desonide	LOC390705	0.020327	effective
Desonide	LOC102723753	0.0110205	effective
Desonide	HERC2P4	0.0110205	effective
Deflazacort	TP53TG3F	0.0200684	effective
Deflazacort	TP53TG3E	0.0200684	effective
Deflazacort	TP53TG3C	0.0200684	effective
Deflazacort	TP53TG3B	0.0200684	effective
Deflazacort	TP53TG3	0.0200684	effective
Deflazacort	REREP3	0.00659053	effective
Deflazacort	PDXDC1	0.0165139	effective
Deflazacort	OR4M2	0.00620895	effective
Deflazacort	MIR6770-2	0.0167748	effective
Deflazacort	MIR6770-1	0.0167748	effective
Deflazacort	MIR6511A3	0.0167748	effective
Deflazacort	MIR6511A2	0.0167748	effective
Deflazacort	MIR6511A1	0.0167748	effective
Deflazacort	MIR3670-3	0.0384391	effective
Deflazacort	MIR3670-2	0.0384391	effective
Deflazacort	MIR3670-1	0.0384391	effective
Deflazacort	MIR3180-3	0.0167748	effective
Deflazacort	MIR3180-2	0.0241135	effective
Deflazacort	MIR3180-1	0.0241135	effective
Deflazacort	MIR3179-4	0.0167748	effective
Deflazacort	MIR3179-3	0.0286041	effective
Deflazacort	MIR3179-2	0.0286041	effective
Deflazacort	MIR3179-1	0.0286041	effective
Deflazacort	LOC390705	0.0474562	effective
Deflazacort	LOC102723753	0.0234423	effective
Deflazacort	LOC101927079	0.0041727	effective
Deflazacort	LOC100288162	0.0167748	effective
Deflazacort	HLA-DRB5	0.00337116	effective
Deflazacort	HERC2P4	0.0234423	effective
Deflazacort	DEFB109P1B	0.0430155	effective
Dasatinib	ZNRD1ASP	0.0435057	ineffective
Dasatinib	WEE2	0.0307192	effective
Dasatinib	SPAG11A	0.0131671	ineffective
Dasatinib	HLA-J	0.0435057	ineffective
Dasatinib	HLA-DRB6	0.0230266	ineffective
Dasatinib	HLA-DRB5	0.0033339	ineffective
Dasatinib	HLA-A	0.0331284	ineffective
Dasatinib	HCG9	0.0113395	ineffective
Dasatinib	GRWD1	0.0471428	ineffective
Dasatinib	DEFB109P1B	0.0197764	ineffective
Dasatinib	DEFB109P1	0.0151033	ineffective
Dasatinib	CTSB	0.00662771	ineffective
Dasatinib	ARNT	0.026599	effective
Cx-4945	TP53TG3F	0.00501835	effective
Cx-4945	TP53TG3E	0.00501835	effective
Cx-4945	TP53TG3D	0.00813869	effective
Cx-4945	TP53TG3C	0.00501835	effective
Cx-4945	TP53TG3B	0.00501835	effective
Cx-4945	TP53TG3	0.00501835	effective
Cx-4945	RAB11FIP4	0.02534	effective
Cx-4945	MIR4724	0.0121808	effective
Cx-4945	MIR193A	0.0111047	effective
Cx-4945	LOC390705	0.0125045	effective
Cx-4945	LOC102723753	0.00293889	effective
Cx-4945	HERC2P4	0.00293889	effective
Cp-673451	ZNF385C	0.00573505	ineffective
Cp-673451	TTC25	0.00573505	ineffective
Cp-673451	P3H4	0.00573505	ineffective
Cp-673451	OR51G1	0.0229096	ineffective
Cp-673451	NT5C3B	0.00573505	ineffective
Cp-673451	NKIRAS2	0.00573505	ineffective
Cp-673451	MIR4724	0.0420094	ineffective
Cp-673451	KLHL11	0.00573505	ineffective
Cp-673451	KLHL10	0.00573505	ineffective
Cp-673451	KDELR1	0.0129758	effective
Cp-673451	KAT2A	0.0161323	ineffective
Cp-673451	JUP	0.00573505	ineffective
Cp-673451	HLA-DRB6	0.0331136	effective
Cp-673451	FKBP10	0.00573505	ineffective
Cp-673451	DNAJC7	0.00573505	ineffective
Cp-673451	DHX58	0.0161323	ineffective
Cp-673451	CNP	0.00573505	ineffective
Cp-673451	ARNT	0.0489006	effective
Cp-673451	ACLY	0.00573505	ineffective
Clomifene	ZNRD1ASP	0.0192225	effective
Clomifene	TP53TG3F	0.00237871	effective
Clomifene	TP53TG3E	0.00237871	effective
Clomifene	TP53TG3D	0.00883345	effective
Clomifene	TP53TG3C	0.00237871	effective
Clomifene	TP53TG3B	0.00237871	effective
Clomifene	TP53TG3	0.00237871	effective
Clomifene	SLC6A10P	0.0256724	effective
Clomifene	REREP3	0.0362522	effective
Clomifene	LOC390705	0.00981085	effective
Clomifene	LOC102723753	0.00197479	effective
Clomifene	HLA-J	0.0192225	effective
Clomifene	HLA-DRB6	0.0417302	effective
Clomifene	HLA-DRB5	0.00637342	effective
Clomifene	HLA-A	0.00879173	effective
Clomifene	HERC2P4	0.00197479	effective
Clomifene	HCG9	0.00566241	effective
Clobetasol-Propionate	TP53TG3F	0.00385833	effective
Clobetasol-Propionate	TP53TG3E	0.00385833	effective
Clobetasol-Propionate	TP53TG3D	0.0110389	effective
Clobetasol-Propionate	TP53TG3C	0.00385833	effective
Clobetasol-Propionate	TP53TG3B	0.00385833	effective
Clobetasol-Propionate	TP53TG3	0.00385833	effective
Clobetasol-Propionate	SLC6A10P	0.0218192	effective
Clobetasol-Propionate	REREP3	0.037801	effective
Clobetasol-Propionate	OR4M2	0.0143623	effective
Clobetasol-Propionate	MIR193A	0.0105314	effective
Clobetasol-Propionate	LOC390705	0.0111939	effective
Clobetasol-Propionate	LOC102723753	0.00362294	effective
Clobetasol-Propionate	LOC101927079	0.0290314	effective
Clobetasol-Propionate	KCNJ14	0.0410329	effective
Clobetasol-Propionate	HLA-DRB5	0.0262165	effective
Clobetasol-Propionate	HERC2P4	0.00362294	effective
Ciclesonide	TP53TG3F	0.0149187	effective
Ciclesonide	TP53TG3E	0.0149187	effective
Ciclesonide	TP53TG3D	0.0244223	effective
Ciclesonide	TP53TG3C	0.0149187	effective
Ciclesonide	TP53TG3B	0.0149187	effective
Ciclesonide	TP53TG3	0.0149187	effective
Ciclesonide	MIR193A	0.0123276	effective
Ciclesonide	LOC390705	0.0317547	effective
Ciclesonide	LOC102723753	0.010669	effective
Ciclesonide	HERC2P4	0.010669	effective
Chlorquinaldol	TP53TG3F	0.00342211	ineffective
Chlorquinaldol	TP53TG3E	0.00342211	ineffective
Chlorquinaldol	TP53TG3D	0.00176447	ineffective
Chlorquinaldol	TP53TG3C	0.00342211	ineffective
Chlorquinaldol	TP53TG3B	0.00342211	ineffective
Chlorquinaldol	TP53TG3	0.00342211	ineffective
Chlorquinaldol	SLC6A10P	0.0312627	ineffective
Chlorquinaldol	REREP3	0.0305982	ineffective
Chlorquinaldol	OR4M2	0.0239633	ineffective
Chlorquinaldol	LOC390705	0.00165585	ineffective
Chlorquinaldol	LOC102723753	0.00365515	ineffective
Chlorquinaldol	LOC101927079	0.0250659	ineffective
Chlorquinaldol	HLA-A	0.0417912	ineffective
Chlorquinaldol	HERC2P4	0.00365515	ineffective
Cgs-15943	MIR4724	0.0484053	effective
Cgs-15943	MIR193A	0.0206207	effective
Cgs-15943	BRD9	0.0319656	ineffective
Cct128930	TP53TG3F	0.0460455	effective
Cct128930	TP53TG3E	0.0460455	effective
Cct128930	TP53TG3C	0.0460455	effective
Cct128930	TP53TG3B	0.0460455	effective
Cct128930	TP53TG3	0.0460455	effective
Cct128930	MIR193A	0.0427551	effective
Cct128930	LOC102723753	0.025826	effective
Cct128930	HERC2P4	0.025826	effective
Carboxypyridine-Disulfide	REREP3	0.00813253	effective
Carboxypyridine-Disulfide	HLA-DRB5	0.046499	effective
Carboxyamidotriazole	SLC6A10P	0.0438963	ineffective
Carboxyamidotriazole	SLC30A5	0.0203915	ineffective
Carboxyamidotriazole	MRPS36	0.0203915	ineffective
Carboxyamidotriazole	LOC101928885	0.0203915	ineffective
Carboxyamidotriazole	HLA-A	0.0385935	ineffective
Carboxyamidotriazole	HCG9	0.0323801	ineffective
Carboxyamidotriazole	CENPH	0.0203915	ineffective
Carboxyamidotriazole	CDK7	0.0203915	ineffective
Carboxyamidotriazole	CCNB1	0.0203915	ineffective
Canertinib	TP53TG3F	0.0303079	effective
Canertinib	TP53TG3E	0.0303079	effective
Canertinib	TP53TG3C	0.0303079	effective
Canertinib	TP53TG3B	0.0303079	effective
Canertinib	TP53TG3	0.0303079	effective
Canertinib	PABPC1P2	0.0464454	effective
Canertinib	MIR193A	0.0319814	effective
Canertinib	LOC102723753	0.030913	effective
Canertinib	HERC2P4	0.030913	effective
Canertinib	CHEK2P2	0.0431438	ineffective
Bx795	TP53TG3F	0.00927736	ineffective
Bx795	TP53TG3E	0.00927736	ineffective
Bx795	TP53TG3D	0.00708445	ineffective
Bx795	TP53TG3C	0.00927736	ineffective
Bx795	TP53TG3B	0.00927736	ineffective
Bx795	TP53TG3	0.00927736	ineffective
Bx795	PABPC1P2	0.0367257	ineffective
Bx795	OR51G1	0.0450419	ineffective
Bx795	LOC390705	0.0052141	ineffective
Bx795	LOC102723753	0.0125109	ineffective
Bx795	HERC2P4	0.0125109	ineffective
Butamben	GRWD1	0.0418367	effective
Butamben	GRIN2D	0.0488643	effective
Butamben	BRD9	0.0313409	ineffective
Brd-K97651142	BRD9	0.0288049	ineffective
Bosentan	ZNRD1ASP	0.012478	ineffective
Bosentan	TP53TG3F	0.0117941	ineffective
Bosentan	TP53TG3E	0.0117941	ineffective
Bosentan	TP53TG3D	0.00892763	ineffective
Bosentan	TP53TG3C	0.0117941	ineffective
Bosentan	TP53TG3B	0.0117941	ineffective
Bosentan	TP53TG3	0.0117941	ineffective
Bosentan	REREP3	0.0114693	ineffective
Bosentan	OR4M2	0.0279692	ineffective
Bosentan	LOC390705	0.0124297	ineffective
Bosentan	LOC102723753	0.00825724	ineffective
Bosentan	LOC101927079	0.0158758	ineffective
Bosentan	HLA-J	0.012478	ineffective
Bosentan	HLA-DRB6	0.0421409	ineffective
Bosentan	HLA-DRB5	0.00221802	ineffective
Bosentan	HLA-A	0.0112719	ineffective
Bosentan	HERC2P4	0.00825724	ineffective
Bosentan	HCG9	0.00929424	ineffective
Bleomycin	TP53TG3F	0.0314909	ineffective
Bleomycin	TP53TG3E	0.0314909	ineffective
Bleomycin	TP53TG3D	0.0207108	ineffective
Bleomycin	TP53TG3C	0.0314909	ineffective
Bleomycin	TP53TG3B	0.0314909	ineffective
Bleomycin	TP53TG3	0.0314909	ineffective
Bleomycin	LOC390705	0.020037	ineffective
Bleomycin	LOC102723753	0.0326405	ineffective
Bleomycin	HERC2P4	0.0326405	ineffective
Bis(Maltolato)Oxovanadium(Iv)	ZNRD1ASP	0.00986136	ineffective
Bis(Maltolato)Oxovanadium(Iv)	TP53TG3F	0.00389796	ineffective
Bis(Maltolato)Oxovanadium(Iv)	TP53TG3E	0.00389796	ineffective
Bis(Maltolato)Oxovanadium(Iv)	TP53TG3D	0.00979352	ineffective
Bis(Maltolato)Oxovanadium(Iv)	TP53TG3C	0.00389796	ineffective
Bis(Maltolato)Oxovanadium(Iv)	TP53TG3B	0.00389796	ineffective
Bis(Maltolato)Oxovanadium(Iv)	TP53TG3	0.00389796	ineffective
Bis(Maltolato)Oxovanadium(Iv)	SLC6A10P	0.0202291	ineffective
Bis(Maltolato)Oxovanadium(Iv)	REREP3	0.0193466	ineffective
Bis(Maltolato)Oxovanadium(Iv)	OR4M2	0.019605	ineffective
Bis(Maltolato)Oxovanadium(Iv)	LOC390705	0.0109125	ineffective
Bis(Maltolato)Oxovanadium(Iv)	LOC102723753	0.00328445	ineffective
Bis(Maltolato)Oxovanadium(Iv)	LOC101927079	0.0110551	ineffective
Bis(Maltolato)Oxovanadium(Iv)	LINC00824	0.0231622	ineffective
Bis(Maltolato)Oxovanadium(Iv)	KCNJ14	0.0461818	ineffective
Bis(Maltolato)Oxovanadium(Iv)	HLA-J	0.00986136	ineffective
Bis(Maltolato)Oxovanadium(Iv)	HLA-DRB6	0.0358291	ineffective
Bis(Maltolato)Oxovanadium(Iv)	HLA-DRB5	0.0105351	ineffective
Bis(Maltolato)Oxovanadium(Iv)	HLA-A	0.0112081	ineffective
Bis(Maltolato)Oxovanadium(Iv)	HERC2P4	0.00328445	ineffective
Bis(Maltolato)Oxovanadium(Iv)	HCG9	0.0077822	ineffective
Bibu-1361	TP53TG3F	0.0217872	effective
Bibu-1361	TP53TG3E	0.0217872	effective
Bibu-1361	TP53TG3D	0.0275524	effective
Bibu-1361	TP53TG3C	0.0217872	effective
Bibu-1361	TP53TG3B	0.0217872	effective
Bibu-1361	TP53TG3	0.0217872	effective
Bibu-1361	LOC390705	0.0448739	effective
Bibu-1361	LOC102723753	0.0120245	effective
Bibu-1361	HERC2P4	0.0120245	effective
Betamethasone-Dipropionate	TP53TG3F	0.0262593	effective
Betamethasone-Dipropionate	TP53TG3E	0.0262593	effective
Betamethasone-Dipropionate	TP53TG3D	0.0281081	effective
Betamethasone-Dipropionate	TP53TG3C	0.0262593	effective
Betamethasone-Dipropionate	TP53TG3B	0.0262593	effective
Betamethasone-Dipropionate	TP53TG3	0.0262593	effective
Betamethasone-Dipropionate	MIR4725	0.0399572	effective
Betamethasone-Dipropionate	MIR4724	0.049344	effective
Betamethasone-Dipropionate	MIR365B	0.0399572	effective
Betamethasone-Dipropionate	MIR193A	0.00746536	effective
Betamethasone-Dipropionate	LOC102723753	0.0120885	effective
Betamethasone-Dipropionate	HERC2P4	0.0120885	effective
Beclomethasone-Dipropionate	TP53TG3F	0.00338272	effective
Beclomethasone-Dipropionate	TP53TG3E	0.00338272	effective
Beclomethasone-Dipropionate	TP53TG3D	0.0061854	effective
Beclomethasone-Dipropionate	TP53TG3C	0.00338272	effective
Beclomethasone-Dipropionate	TP53TG3B	0.00338272	effective
Beclomethasone-Dipropionate	TP53TG3	0.00338272	effective
Beclomethasone-Dipropionate	SLC6A10P	0.0315425	effective
Beclomethasone-Dipropionate	OR4M2	0.0122873	effective
Beclomethasone-Dipropionate	MIR193A	0.00254496	effective
Beclomethasone-Dipropionate	LOC390705	0.00780218	effective
Beclomethasone-Dipropionate	LOC102723753	0.00249922	effective
Beclomethasone-Dipropionate	LOC101927079	0.0189869	effective
Beclomethasone-Dipropionate	KCNJ14	0.0284237	effective
Beclomethasone-Dipropionate	HLA-A	0.0202365	effective
Beclomethasone-Dipropionate	HERC2P4	0.00249922	effective
Beclomethasone-Dipropionate	HCG9	0.0290626	effective
Beclomethasone-Dipropionate	GRWD1	0.0485535	effective
Azd4547	ZNF385C	0.0167325	ineffective
Azd4547	TTC25	0.0167325	ineffective
Azd4547	TP53TG3F	0.00497764	ineffective
Azd4547	TP53TG3E	0.00497764	ineffective
Azd4547	TP53TG3D	0.0304666	ineffective
Azd4547	TP53TG3D	0.00648369	ineffective
Azd4547	TP53TG3C	0.00497764	ineffective
Azd4547	TP53TG3B	0.00497764	ineffective
Azd4547	TP53TG3	0.00497764	ineffective
Azd4547	RAB11FIP4	0.0103667	ineffective
Azd4547	PABPC1P2	0.0155128	ineffective
Azd4547	P3H4	0.0167325	ineffective
Azd4547	NT5C3B	0.0167325	ineffective
Azd4547	NKIRAS2	0.0167325	ineffective
Azd4547	MIR4724	0.00714911	ineffective
Azd4547	MICA	0.037721	effective
Azd4547	LOC390705	0.00487366	ineffective
Azd4547	LOC102723753	0.00658865	ineffective
Azd4547	KLHL11	0.0167325	ineffective
Azd4547	KLHL10	0.0167325	ineffective
Azd4547	KAT2A	0.0288874	ineffective
Azd4547	JUP	0.0167325	ineffective
Azd4547	HLA-DRB6	0.00262329	effective
Azd4547	HLA-DRB5	0.00210075	effective
Azd4547	HLA-DRB1	0.0127482	effective
Azd4547	HERC2P4	0.00658865	ineffective
Azd4547	FKBP10	0.0167325	ineffective
Azd4547	FHOD3	0.0153318	ineffective
Azd4547	DNAJC7	0.0167325	ineffective
Azd4547	DHX58	0.0288874	ineffective
Azd4547	CNP	0.0167325	ineffective
Azd4547	BRD9	0.0237985	ineffective
Azd4547	ACLY	0.0167325	ineffective
Azd1480	ZNF705G	0.0184836	ineffective
Azd1480	ZNF385C	0.00217124	ineffective
Azd1480	USP17L4	0.0184836	ineffective
Azd1480	USP17L1	0.0184836	ineffective
Azd1480	TTC25	0.00217124	ineffective
Azd1480	TP53TG3F	0.00193611	ineffective
Azd1480	TP53TG3E	0.00193611	ineffective
Azd1480	TP53TG3D	0.00351072	ineffective
Azd1480	TP53TG3D	0.0391819	ineffective
Azd1480	TP53TG3C	0.045822	ineffective
Azd1480	TP53TG3B	0.045822	ineffective
Azd1480	TP53TG3	0.045822	ineffective
Azd1480	SPAG11A	0.00848433	ineffective
Azd1480	SLC6A10P	0.0425606	ineffective
Azd1480	SLC2A9	0.0254749	ineffective
Azd1480	REREP3	0.0465611	ineffective
Azd1480	RAB5C	0.0305124	ineffective
Azd1480	PRR23D1	0.0187678	ineffective
Azd1480	P3H4	0.00217124	ineffective
Azd1480	NT5C3B	0.00217124	ineffective
Azd1480	NKIRAS2	0.00217124	ineffective
Azd1480	MIR193A	0.0477716	ineffective
Azd1480	LOC390705	0.0267174	ineffective
Azd1480	LOC102723753	0.00189898	ineffective
Azd1480	LINC00965	0.0184836	ineffective
Azd1480	KLHL11	0.00217124	ineffective
Azd1480	KLHL10	0.00217124	ineffective
Azd1480	KCNJ14	0.0450133	ineffective
Azd1480	KAT2A	0.00648342	ineffective
Azd1480	JUP	0.00217124	ineffective
Azd1480	HSPB9	0.0305124	ineffective
Azd1480	HLA-A	0.0319371	ineffective
Azd1480	HERC2P4	0.00189898	ineffective
Azd1480	FKBP10	0.00217124	ineffective
Azd1480	FAM90A7P	0.0187678	ineffective
Azd1480	FAM90A10P	0.0187678	ineffective
Azd1480	FAM66B	0.0184836	ineffective
Azd1480	DNAJC7	0.00217124	ineffective
Azd1480	DHX58	0.00648342	ineffective
Azd1480	DEFB4B	0.0187678	ineffective
Azd1480	DEFB109P1B	0.00768138	ineffective
Azd1480	DEFB107A	0.0187678	ineffective
Azd1480	DEFB106A	0.0187678	ineffective
Azd1480	DEFB105A	0.0187678	ineffective
Azd1480	DEFB104A	0.0187678	ineffective
Azd1480	DEFB103A	0.0187678	ineffective
Azd1480	CNP	0.00217124	ineffective
Azd1480	ACLY	0.00217124	ineffective
Az3146	GRWD1	0.0298105	effective
Az3146	GRIN2D	0.0494047	effective
Atipamezole	WEE2-AS1	0.0375648	effective
Atipamezole	KIAA1147	0.0375648	effective
Atipamezole	HLA-DRB1	0.0405531	effective
Atenolol-(-)	ZNF385C	0.0321394	ineffective
Atenolol-(-)	TTC25	0.0321394	ineffective
Atenolol-(-)	RAB11FIP4	0.0431855	ineffective
Atenolol-(-)	P3H4	0.0321394	ineffective
Atenolol-(-)	OR51G1	0.0421362	ineffective
Atenolol-(-)	NT5C3B	0.0321394	ineffective
Atenolol-(-)	NKIRAS2	0.0321394	ineffective
Atenolol-(-)	MIR4724	0.0383323	ineffective
Atenolol-(-)	KLHL11	0.0321394	ineffective
Atenolol-(-)	KLHL10	0.0321394	ineffective
Atenolol-(-)	KAT2A	0.0226635	ineffective
Atenolol-(-)	JUP	0.0321394	ineffective
Atenolol-(-)	FKBP10	0.0321394	ineffective
Atenolol-(-)	DNAJC7	0.0321394	ineffective
Atenolol-(-)	DHX58	0.0226635	ineffective
Atenolol-(-)	CNP	0.0321394	ineffective
Atenolol-(-)	ARNT	0.0377919	effective
Atenolol-(-)	ACLY	0.0321394	ineffective
Arcyriaflavin-A	MIR193A	0.0142054	effective
Arcyriaflavin-A	KCNJ14	0.0116643	effective
Arcyriaflavin-A	GRWD1	0.00785949	effective
Arcyriaflavin-A	GRIN2D	0.0237863	effective
Arcyriaflavin-A	BRD9	0.0112374	ineffective
2,3-Dcpe	TP53TG3F	0.0183648	ineffective
2,3-Dcpe	TP53TG3E	0.0183648	ineffective
2,3-Dcpe	TP53TG3D	0.00490603	ineffective
2,3-Dcpe	TP53TG3C	0.0183648	ineffective
2,3-Dcpe	TP53TG3B	0.0183648	ineffective
2,3-Dcpe	TP53TG3	0.0183648	ineffective
2,3-Dcpe	PABPC1P2	0.0177269	ineffective
2,3-Dcpe	LOC390705	0.0082672	ineffective
2,3-Dcpe	LOC102723753	0.0114245	ineffective
2,3-Dcpe	HERC2P4	0.0114245	ineffective
1S,3R-Rsl-3	TP53TG3F	0.0291612	ineffective
1S,3R-Rsl-3	TP53TG3E	0.0291612	ineffective
1S,3R-Rsl-3	TP53TG3D	0.0449427	ineffective
1S,3R-Rsl-3	TP53TG3C	0.0291612	ineffective
1S,3R-Rsl-3	TP53TG3B	0.0291612	ineffective
1S,3R-Rsl-3	TP53TG3	0.0291612	ineffective
1S,3R-Rsl-3	MIR193A	0.0445505	ineffective
1S,3R-Rsl-3	LOC390705	0.0385848	ineffective
1S,3R-Rsl-3	LOC102723753	0.0338054	ineffective
1S,3R-Rsl-3	HERC2P4	0.0338054	ineffective
12-O-Tetradecanoylphorbol-13-Acetate	TP53TG3F	0.0331284	effective
12-O-Tetradecanoylphorbol-13-Acetate	TP53TG3E	0.0331284	effective
12-O-Tetradecanoylphorbol-13-Acetate	TP53TG3D	0.0143759	effective
12-O-Tetradecanoylphorbol-13-Acetate	TP53TG3C	0.0331284	effective
12-O-Tetradecanoylphorbol-13-Acetate	TP53TG3B	0.0331284	effective
12-O-Tetradecanoylphorbol-13-Acetate	TP53TG3	0.0331284	effective
12-O-Tetradecanoylphorbol-13-Acetate	MIR4724	0.0335585	effective
12-O-Tetradecanoylphorbol-13-Acetate	MIR193A	0.029814	effective
12-O-Tetradecanoylphorbol-13-Acetate	LOC390705	0.0409259	effective
12-O-Tetradecanoylphorbol-13-Acetate	LOC102723753	0.0106779	effective
12-O-Tetradecanoylphorbol-13-Acetate	HERC2P4	0.0106779	effective
(5Z)-7-Oxozeaenol	MIR193A	0.0276319	ineffective
(5Z)-7-Oxozeaenol	LOC390705	0.0411102	ineffective

## Sheet: Supplement Table S6
Supplement Table S6: Correlation between 15902 genes with IRSHG using Pearson correlation analysis.
id	pearson_coeffient	pvalue
TGFB1	0.687738	9.3087e-23
OLFML2B	0.642588	3.44007e-19
CDH11	0.631622	2.06569e-18
BGN	0.620939	1.10715e-17
SPARC	0.601929	1.88323e-16
VCAN	0.600873	2.19217e-16
INHBA	0.590142	9.95036e-16
PLXDC2	0.590108	9.99688e-16
F2R	0.58923	1.12871e-15
CMTM3	0.58369	2.40595e-15
FCGR2A	0.582252	2.92164e-15
COL5A1	0.575065	7.59992e-15
AEBP1	0.572419	1.07434e-14
COL5A2	0.57155	1.20303e-14
PDGFRB	0.570067	1.45765e-14
LRRC32	0.565259	2.69953e-14
FAP	0.563276	3.47076e-14
NID2	0.561865	4.1461e-14
C3AR1	0.559497	5.5769e-14
TIMP2	0.5589	6.00772e-14
THY1	0.558449	6.35373e-14
FNDC1	0.556383	8.20603e-14
CSGALNACT2	0.553892	1.11456e-13
LAMB1	0.551694	1.45721e-13
TIMP1	0.551444	1.50216e-13
GPNMB	0.550968	1.59129e-13
SULF1	0.549367	1.93115e-13
NOX4	0.547676	2.36652e-13
SERPINH1	0.545432	3.09379e-13
EVA1B	0.544529	3.44432e-13
COL6A2	0.543321	3.97408e-13
LUM	0.543172	4.04436e-13
KIAA0930	0.542965	4.1447e-13
ISLR	0.54256	4.34736e-13
COL6A3	0.540819	5.33465e-13
CLEC11A	0.537984	7.42543e-13
IGFBP7	0.537828	7.56069e-13
COL8A1	0.533982	1.17809e-12
THBS2	0.533534	1.24017e-12
LTBP2	0.532851	1.34087e-12
PLBD2	0.531765	1.51744e-12
COL1A2	0.531489	1.56589e-12
TYROBP	0.530377	1.77632e-12
COL1A1	0.52908	2.05674e-12
LGALS1	0.529053	2.06294e-12
COL4A1	0.527871	2.35659e-12
HTRA3	0.527749	2.38893e-12
FUT11	0.527724	2.39566e-12
CTHRC1	0.527298	2.51298e-12
COL3A1	0.527235	2.5307e-12
COL4A2	0.526412	2.77487e-12
C5AR1	0.524718	3.35153e-12
SFRP4	0.52333	3.90953e-12
EFEMP2	0.523049	4.03307e-12
EMILIN1	0.522413	4.32649e-12
HIC1	0.522154	4.45183e-12
ASPN	0.521155	4.96907e-12
CD14	0.520814	5.15844e-12
FBN1	0.519833	5.74394e-12
FCGR1B	0.519578	5.90672e-12
SMIM3	0.517316	7.55641e-12
ENTPD1	0.516277	8.45622e-12
CALHM2	0.515985	8.72742e-12
FCER1G	0.515771	8.93161e-12
GGT5	0.515752	8.95025e-12
AXL	0.514981	9.72584e-12
CTSK	0.514549	1.01882e-11
IKBIP	0.51222	1.30754e-11
PPP1R18	0.510367	1.59257e-11
C1QB	0.510073	1.6429e-11
GLT8D2	0.509864	1.67972e-11
TM6SF1	0.509774	1.69588e-11
DKK3	0.509695	1.7101e-11
OSTM1	0.509648	1.71858e-11
ITGBL1	0.509318	1.77965e-11
COL12A1	0.508413	1.95803e-11
MS4A4A	0.506413	2.41582e-11
MS4A7	0.506394	2.42069e-11
CHST7	0.506393	2.42106e-11
BACE1	0.506272	2.4518e-11
FOXS1	0.505524	2.65127e-11
PLD3	0.504865	2.83996e-11
MXRA8	0.503397	3.30817e-11
GLIPR1	0.50193	3.8504e-11
PDGFC	0.501036	4.2221e-11
C1QC	0.499423	4.98229e-11
FSTL1	0.498822	5.29836e-11
FPR3	0.498809	5.30506e-11
ADAMTS2	0.497224	6.23554e-11
PCOLCE	0.497221	6.23725e-11
GEM	0.496777	6.52522e-11
SPOCK1	0.495811	7.19604e-11
RAI14	0.495807	7.19918e-11
SLC24A3	0.495413	7.49165e-11
APOE	0.494864	7.9183e-11
TNFSF4	0.494197	8.46924e-11
SPSB1	0.493715	8.88973e-11
DACT1	0.493574	9.01675e-11
MYADM	0.493059	9.49499e-11
SDC2	0.492194	1.0354e-10
GPR34	0.491469	1.11317e-10
SGTB	0.491309	1.13107e-10
RAB31	0.490806	1.18927e-10
ECM2	0.490636	1.20952e-10
TMEM119	0.489951	1.2948e-10
ANGPTL2	0.489917	1.29909e-10
SERPING1	0.489887	1.30304e-10
TSPAN4	0.487713	1.61569e-10
CHSY3	0.486841	1.76054e-10
GPX8	0.486593	1.80392e-10
LOXL1	0.485958	1.91985e-10
ITGB5	0.485956	1.92018e-10
NREP	0.485824	1.94526e-10
AP1M1	0.485682	1.97249e-10
SERPINF1	0.484813	2.14754e-10
MFAP2	0.484651	2.18165e-10
SNAI2	0.484574	2.1982e-10
EDNRA	0.484406	2.23452e-10
MAFB	0.484351	2.24649e-10
TGFBI	0.484224	2.27444e-10
SYT11	0.484165	2.28771e-10
HMCN1	0.483012	2.55917e-10
MFGE8	0.482483	2.69387e-10
C1R	0.481528	2.95474e-10
CTSL	0.479879	3.46352e-10
EMP3	0.479783	3.49589e-10
C1QA	0.479609	3.55461e-10
HEYL	0.478821	3.83369e-10
TLR7	0.478137	4.09293e-10
PEA15	0.477399	4.39197e-10
FKBP7	0.476914	4.59956e-10
ADAP2	0.476611	4.73393e-10
ABCA1	0.476005	5.01482e-10
CSF1R	0.475877	5.07596e-10
SH3RF3	0.475624	5.19912e-10
MGAT1	0.474824	5.60857e-10
OLFML1	0.474717	5.66537e-10
GNS	0.473931	6.10168e-10
HSD11B1	0.473415	6.4059e-10
FRMD6	0.472987	6.66902e-10
COL18A1	0.472874	6.74031e-10
LOX	0.47141	7.73197e-10
SH2B3	0.470965	8.06036e-10
MRC2	0.470634	8.31301e-10
COL10A1	0.470469	8.44231e-10
GAL3ST4	0.469448	9.28359e-10
C1orf54	0.469368	9.35336e-10
TWSG1	0.468921	9.74936e-10
CLIC4	0.468678	9.97206e-10
RHOQ	0.468412	1.02205e-09
MYO5A	0.468311	1.03164e-09
RBMS1	0.467412	1.12105e-09
ARID5A	0.467016	1.16281e-09
MOXD1	0.467015	1.16293e-09
TUBA1A	0.466664	1.20118e-09
CHN1	0.466424	1.22799e-09
C1S	0.466096	1.26562e-09
HOMER3	0.466069	1.2687e-09
HTRA1	0.466028	1.27348e-09
COL8A2	0.466001	1.27676e-09
PXDN	0.465651	1.31843e-09
VEGFC	0.4654	1.34913e-09
LY96	0.465242	1.3688e-09
RFTN1	0.465209	1.37301e-09
LHFPL2	0.465163	1.37883e-09
NUAK1	0.464679	1.44122e-09
C11orf96	0.464099	1.51981e-09
LATS2	0.463723	1.5729e-09
EGR2	0.463263	1.64017e-09
ARL4C	0.46177	1.87862e-09
BICC1	0.461081	1.99963e-09
DPYSL2	0.46026	2.15352e-09
PXDC1	0.460196	2.16602e-09
SUGCT	0.459864	2.2319e-09
KCTD20	0.459625	2.28046e-09
PRR16	0.459378	2.33168e-09
TNFAIP6	0.459244	2.36005e-09
COL15A1	0.459092	2.3925e-09
AMIGO2	0.458693	2.47978e-09
FIBIN	0.458026	2.63251e-09
MYH9	0.457766	2.69456e-09
CHSY1	0.457258	2.81983e-09
CD163	0.455672	3.24793e-09
GFPT2	0.455644	3.25606e-09
GLIS2	0.455254	3.37098e-09
LAMC1	0.454592	3.57467e-09
AIF1	0.454501	3.60385e-09
SRPX2	0.454293	3.67081e-09
AKR1B1	0.454138	3.72128e-09
PKD2	0.453851	3.81704e-09
MSR1	0.45303	4.10383e-09
PSAP	0.45285	4.16971e-09
FBLN2	0.45279	4.19169e-09
PRRX1	0.451635	4.63966e-09
CD86	0.451243	4.80197e-09
GXYLT2	0.450911	4.9439e-09
MAP3K7CL	0.449999	5.35407e-09
ITPRIP	0.448875	5.90517e-09
ENG	0.447064	6.90931e-09
CRISPLD1	0.445864	7.66323e-09
TCF4	0.445858	7.66731e-09
MYH10	0.445742	7.74397e-09
GAS7	0.445717	7.76068e-09
VKORC1	0.445505	7.90361e-09
GPR137B	0.445403	7.97352e-09
NRP1	0.445221	8.09904e-09
RRAGD	0.445152	8.14762e-09
ADAMTS3	0.444871	8.34648e-09
DPYSL3	0.444777	8.41395e-09
RARRES2	0.444268	8.78976e-09
CRISPLD2	0.443612	9.29752e-09
IGFBP6	0.442488	1.02337e-08
CD200	0.4423	1.03983e-08
ANXA5	0.442066	1.06081e-08
HIVEP2	0.441866	1.07902e-08
FMNL3	0.441864	1.07916e-08
ST8SIA4	0.441781	1.08686e-08
P2RX7	0.441615	1.10226e-08
RCN3	0.441602	1.10346e-08
RASSF2	0.440892	1.17205e-08
FJX1	0.440765	1.18468e-08
GREB1	0.439794	1.28613e-08
FCGR2B	0.439243	1.34737e-08
ASAP1	0.439192	1.35314e-08
LEPROT	0.439149	1.3581e-08
ATP8B2	0.438418	1.44431e-08
PLAU	0.438115	1.4815e-08
TIMP3	0.43794	1.50348e-08
FKBP14	0.437901	1.50842e-08
DOK5	0.437785	1.52315e-08
LBH	0.43766	1.53921e-08
MAML2	0.437403	1.57272e-08
TREM2	0.436882	1.64287e-08
PILRA	0.436784	1.65643e-08
SPIN1	0.436587	1.68391e-08
DENND5A	0.436564	1.68716e-08
FHL3	0.435767	1.80325e-08
TSHZ3	0.435655	1.82012e-08
LOXL3	0.435396	1.8599e-08
RGS1	0.435229	1.88594e-08
CTSB	0.435121	1.90301e-08
LAPTM5	0.435091	1.90774e-08
HCK	0.435078	1.90984e-08
DCN	0.434845	1.94717e-08
PRKD1	0.434711	1.96894e-08
MAP7D1	0.433532	2.17115e-08
OLFML3	0.433314	2.21065e-08
CD248	0.433299	2.21341e-08
VSIG4	0.433289	2.21524e-08
NDN	0.432945	2.27919e-08
SLC15A4	0.432852	2.29681e-08
CNN3	0.432461	2.37211e-08
ELMO1	0.432428	2.37864e-08
CLEC2B	0.432272	2.40939e-08
C3orf80	0.432144	2.43489e-08
FAM89B	0.431535	2.56007e-08
HAS2	0.431468	2.57434e-08
MARCKS	0.431453	2.5775e-08
IGFBP3	0.43122	2.6274e-08
MNDA	0.431041	2.66615e-08
ZNF423	0.431004	2.67432e-08
MATN3	0.430904	2.69634e-08
IL1R1	0.430904	2.69637e-08
BICD2	0.430748	2.73105e-08
MS4A6A	0.430376	2.81558e-08
TUBB6	0.429927	2.92106e-08
ATXN1	0.429687	2.97914e-08
LAIR1	0.42962	2.99551e-08
FN1	0.429434	3.04118e-08
PGM2L1	0.429381	3.05458e-08
NAGK	0.429363	3.05892e-08
ALDH1A3	0.429006	3.1495e-08
SERINC1	0.428831	3.19463e-08
GRN	0.428713	3.22562e-08
GPC6	0.427771	3.48245e-08
IGSF6	0.427428	3.58078e-08
DDR2	0.427258	3.63071e-08
PDGFRL	0.426656	3.81201e-08
LIPA	0.426616	3.82466e-08
SYNDIG1	0.426502	3.85982e-08
ADAMTS12	0.426355	3.90629e-08
SOCS5	0.42609	3.99084e-08
CRIM1	0.426038	4.0075e-08
SFRP2	0.425613	4.14736e-08
ITGB2	0.425147	4.30627e-08
C1orf162	0.424883	4.39869e-08
VIM	0.424679	4.47155e-08
TLR4	0.42451	4.53266e-08
UBE2Q2	0.424339	4.59561e-08
MARVELD1	0.424285	4.6156e-08
HLX	0.424204	4.64572e-08
SGIP1	0.423723	4.82847e-08
SH3BP5	0.423352	4.97432e-08
LAMA2	0.423108	5.07243e-08
SLC39A13	0.422635	5.26783e-08
GPX4	0.42235	5.38916e-08
SKI	0.422341	5.39283e-08
IGFBP4	0.421905	5.58407e-08
PLEKHO2	0.42182	5.62196e-08
FBXL7	0.421765	5.64644e-08
EFEMP1	0.421733	5.66096e-08
ARSB	0.421542	5.74763e-08
CCR1	0.421408	5.80932e-08
HEG1	0.421115	5.94655e-08
NRROS	0.420932	6.03353e-08
RNF24	0.420676	6.15768e-08
VAT1	0.420485	6.25164e-08
TLR1	0.420366	6.31086e-08
TPP1	0.420122	6.43415e-08
MPEG1	0.420032	6.48005e-08
FERMT2	0.420021	6.48569e-08
GPR65	0.419853	6.57292e-08
PDPN	0.419693	6.65647e-08
ARRDC3	0.419625	6.6926e-08
CNRIP1	0.419049	7.004e-08
MGP	0.418845	7.11818e-08
VAMP5	0.418683	7.20969e-08
RNASE6	0.418556	7.2821e-08
PLEKHG1	0.418544	7.28899e-08
CHST11	0.418522	7.30179e-08
KCTD10	0.418469	7.3324e-08
MAN1A1	0.418386	7.38032e-08
MRC1	0.418336	7.40934e-08
CTTNBP2NL	0.418247	7.46154e-08
NAP1L3	0.417967	7.62794e-08
PPT1	0.417873	7.68484e-08
FZD2	0.417465	7.93499e-08
TMEM47	0.417243	8.07499e-08
NOTCH2	0.417042	8.20307e-08
CD81	0.416824	8.34461e-08
TXNDC15	0.416107	8.82689e-08
KCNJ8	0.415913	8.96192e-08
SGCD	0.415598	9.18501e-08
CCDC80	0.415134	9.52355e-08
MRAS	0.415131	9.52605e-08
PANX1	0.414964	9.65061e-08
MAP4K4	0.414869	9.72249e-08
SEC23A	0.414779	9.79107e-08
TSHZ2	0.414521	9.98938e-08
TWIST1	0.414073	1.03441e-07
IFFO1	0.413923	1.04648e-07
GJA1	0.413721	1.06302e-07
EPB41L3	0.413427	1.08761e-07
MXRA7	0.4134	1.08986e-07
C1orf216	0.413209	1.10612e-07
TERF2IP	0.413154	1.1108e-07
TCEAL7	0.412845	1.13773e-07
ZNF532	0.41264	1.15593e-07
DZIP1	0.412515	1.16714e-07
VASN	0.412257	1.19064e-07
PYGL	0.411442	1.26798e-07
ZSWIM6	0.411428	1.26932e-07
LGMN	0.411418	1.27034e-07
HMOX1	0.410983	1.31361e-07
HEY1	0.410608	1.35197e-07
GPX7	0.410421	1.37161e-07
TLR8	0.410165	1.39883e-07
FLNA	0.410164	1.39888e-07
ITGAV	0.409825	1.43575e-07
WNT2	0.40932	1.49232e-07
SLAMF8	0.409283	1.49662e-07
UBQLN2	0.40888	1.54338e-07
VGLL3	0.40871	1.56357e-07
TGFB1I1	0.408596	1.57727e-07
QKI	0.408282	1.61554e-07
ABL2	0.40828	1.61576e-07
BEND6	0.407591	1.70287e-07
TMEM158	0.407455	1.72058e-07
DEGS1	0.40709	1.76888e-07
ACVR1	0.407014	1.77922e-07
CYB5R3	0.406711	1.82057e-07
ROR2	0.406676	1.82543e-07
SMURF2	0.405998	1.92165e-07
SLC38A6	0.40564	1.97439e-07
FEZ2	0.405477	1.99891e-07
ITGAM	0.404675	2.1236e-07
RDX	0.404578	2.13915e-07
FTO	0.404505	2.15107e-07
CRTAP	0.404405	2.16731e-07
RNF144A	0.404392	2.16945e-07
GAS1	0.404099	2.21782e-07
RRAGA	0.403758	2.27535e-07
WIPF1	0.40375	2.27671e-07
OLR1	0.403136	2.38409e-07
SPAG9	0.403131	2.38507e-07
PRICKLE1	0.402906	2.42557e-07
BNIP2	0.402775	2.4496e-07
JAZF1	0.40273	2.45778e-07
STON1	0.402705	2.4624e-07
EOGT	0.402681	2.4668e-07
LRCH2	0.402416	2.51633e-07
CD99	0.401938	2.60775e-07
CPNE2	0.401825	2.62991e-07
COX7A1	0.401803	2.63428e-07
SUPT7L	0.401795	2.63583e-07
RNF13	0.401781	2.63845e-07
FMO1	0.401145	2.76677e-07
OMD	0.401118	2.77228e-07
MCC	0.401034	2.78972e-07
CCDC102A	0.40075	2.84939e-07
ENOX1	0.400514	2.8998e-07
ZFPM2	0.400476	2.90791e-07
TMEM109	0.400187	2.97106e-07
TENM4	0.400065	2.99813e-07
TGFBR1	0.399867	3.04248e-07
BICD1	0.399792	3.05946e-07
THBS1	0.399677	3.08574e-07
AP1S2	0.399637	3.09489e-07
PLA2G7	0.399394	3.15119e-07
ATP8B4	0.398904	3.2674e-07
GLIPR2	0.398786	3.29615e-07
ZEB2	0.398722	3.31184e-07
PCDH18	0.39843	3.38386e-07
RTN4	0.398172	3.44892e-07
PLAGL1	0.397907	3.51699e-07
ELK3	0.397838	3.53515e-07
ST6GALNAC5	0.397744	3.55959e-07
KCNE4	0.397553	3.61007e-07
EFS	0.397532	3.61558e-07
ABL1	0.397529	3.6165e-07
MSRB3	0.397476	3.63065e-07
CH25H	0.397245	3.69271e-07
CHST14	0.397202	3.70457e-07
PLAT	0.397111	3.72926e-07
PLEKHO1	0.396977	3.7662e-07
GLI1	0.396574	3.8795e-07
MPDZ	0.395849	4.09114e-07
MDFIC	0.395203	4.28926e-07
ZNF521	0.395093	4.32383e-07
HIP1	0.394682	4.45546e-07
ZCCHC24	0.394013	4.6782e-07
EML1	0.393955	4.698e-07
TFEC	0.393856	4.73191e-07
PIK3CA	0.393647	4.80438e-07
TRPC1	0.393374	4.90065e-07
TMEM200B	0.39334	4.91275e-07
NOTCH3	0.393096	5.00037e-07
ARHGAP31	0.392602	5.18269e-07
CD109	0.392562	5.19772e-07
RGCC	0.392522	5.21303e-07
EVI2A	0.392166	5.34915e-07
OAZ2	0.391178	5.74449e-07
RRAS	0.390741	5.92834e-07
PLXDC1	0.390736	5.93035e-07
NTAN1	0.390677	5.95595e-07
SLC2A3	0.390376	6.08631e-07
CTSC	0.390077	6.21827e-07
GREM1	0.389993	6.25626e-07
DIO2	0.389871	6.31103e-07
MSANTD3	0.389681	6.39769e-07
ZNF805	0.389584	6.44229e-07
TRAK2	0.389176	6.63349e-07
KLC1	0.389007	6.71436e-07
CCL2	0.388752	6.83811e-07
MN1	0.388518	6.9536e-07
ATP10D	0.38821	7.10836e-07
THBD	0.388095	7.16701e-07
CSF2RA	0.387911	7.26163e-07
VCAM1	0.387828	7.30436e-07
ZYX	0.387568	7.44141e-07
MSN	0.387487	7.48418e-07
FYN	0.387266	7.60319e-07
MRGPRF	0.387084	7.70234e-07
CLEC4A	0.387053	7.71934e-07
PTPN14	0.386963	7.76889e-07
PDE1A	0.386815	7.85104e-07
CLMP	0.386746	7.88968e-07
LCA5	0.386483	8.03828e-07
IQSEC1	0.386392	8.09044e-07
LST1	0.386262	8.16553e-07
RAB29	0.385745	8.46996e-07
GJA4	0.385571	8.57503e-07
PRELP	0.384917	8.98124e-07
C20orf194	0.384912	8.9844e-07
CNN2	0.384813	9.04729e-07
BEX4	0.384557	9.21202e-07
PLA2G4C	0.384388	9.32236e-07
HERPUD2	0.384141	9.48652e-07
LMO2	0.384073	9.53173e-07
CPVL	0.38348	9.93833e-07
UACA	0.383433	9.97124e-07
IFI16	0.382583	1.05843e-06
LXN	0.382258	1.08276e-06
PLXNC1	0.382243	1.0839e-06
MPV17	0.382224	1.08537e-06
CORIN	0.382004	1.10218e-06
A2M	0.381804	1.11771e-06
LY86	0.381353	1.15347e-06
OSBPL8	0.381229	1.16349e-06
RBFOX2	0.381212	1.16486e-06
MAGEH1	0.381024	1.1803e-06
PLTP	0.380831	1.1963e-06
CDC42EP3	0.380555	1.21951e-06
C4orf3	0.380487	1.22524e-06
MPP1	0.380117	1.25718e-06
REXO2	0.380111	1.25775e-06
SERPINE1	0.380045	1.26355e-06
CALCRL	0.379828	1.28273e-06
ARHGEF6	0.37978	1.28703e-06
LTBP1	0.379328	1.32804e-06
ANKRD6	0.379172	1.34243e-06
ZNF469	0.378979	1.36053e-06
LILRB2	0.378891	1.36884e-06
CLEC7A	0.378863	1.37149e-06
GINM1	0.378617	1.39502e-06
GADD45B	0.378439	1.41232e-06
DOCK10	0.378435	1.41269e-06
SAMSN1	0.378422	1.41398e-06
RAB8B	0.37815	1.44076e-06
GRAMD1A	0.378074	1.44838e-06
TINF2	0.37794	1.46183e-06
GIMAP8	0.377335	1.52413e-06
NCF2	0.37696	1.56392e-06
NNMT	0.376947	1.56536e-06
GPR176	0.376507	1.61338e-06
SLC38A2	0.376373	1.62837e-06
ROBO1	0.37625	1.64219e-06
SEMA4C	0.376232	1.64415e-06
MACF1	0.376229	1.64451e-06
CDH5	0.37558	1.71937e-06
MEF2C	0.374827	1.81023e-06
PCDH17	0.374751	1.81967e-06
HECW2	0.374711	1.82465e-06
SELE	0.374624	1.83543e-06
RAB23	0.374476	1.8541e-06
CYS1	0.374268	1.88056e-06
SLC38A9	0.374038	1.91029e-06
TRIL	0.37379	1.94282e-06
CNEP1R1	0.37378	1.94417e-06
CDS2	0.373702	1.95454e-06
SNX18	0.373638	1.96307e-06
PDLIM2	0.373429	1.99122e-06
FLII	0.37276	2.08376e-06
ZNF230	0.372482	2.12336e-06
USP11	0.371977	2.19728e-06
GNG11	0.371639	2.24804e-06
RAB11FIP5	0.371633	2.24894e-06
TGFB2	0.371597	2.25443e-06
CREM	0.371237	2.30988e-06
TIE1	0.370894	2.36394e-06
LAPTM4A	0.370855	2.37019e-06
CPT1C	0.370768	2.38422e-06
ARL2BP	0.370703	2.39454e-06
MXRA5	0.370615	2.40886e-06
RILPL1	0.370598	2.41154e-06
COLEC12	0.370575	2.4153e-06
SPRED1	0.370525	2.42342e-06
ERG	0.370512	2.42559e-06
EHD3	0.370467	2.43299e-06
PRKAR1A	0.370407	2.44281e-06
FILIP1L	0.370216	2.47445e-06
SWAP70	0.370064	2.4999e-06
RASL12	0.37004	2.50382e-06
TPM4	0.370036	2.50448e-06
RASGRP3	0.369987	2.51286e-06
YPEL5	0.369901	2.52732e-06
HIVEP3	0.369814	2.54217e-06
FCHSD2	0.369561	2.58575e-06
SLC35G2	0.369542	2.58912e-06
NPHP3	0.369456	2.60408e-06
FSTL3	0.36918	2.65276e-06
CDH13	0.3691	2.66698e-06
C8orf48	0.368985	2.68749e-06
FZD7	0.368919	2.69954e-06
MFAP5	0.368903	2.70231e-06
ACKR3	0.368856	2.7109e-06
PLA2G15	0.368678	2.74333e-06
ZNF304	0.368567	2.76391e-06
MLLT11	0.368517	2.7731e-06
LIX1L	0.36801	2.86866e-06
ATP6AP2	0.367966	2.87718e-06
SLIT2	0.367939	2.8823e-06
PPM1M	0.367898	2.89019e-06
CYP1B1	0.367835	2.90241e-06
VEGFB	0.367654	2.93765e-06
MICU3	0.367644	2.93964e-06
FXYD6	0.367479	2.97218e-06
ITGA4	0.367354	2.99696e-06
GIMAP4	0.367345	2.99874e-06
CALU	0.366791	3.11147e-06
RGS18	0.366486	3.17511e-06
CALD1	0.366422	3.1886e-06
ZNF436	0.366387	3.19604e-06
CPNE8	0.36625	3.22538e-06
NXN	0.366212	3.23349e-06
BNC2	0.365836	3.31503e-06
ZNF264	0.36583	3.31647e-06
ARMCX1	0.365756	3.33275e-06
PTPRM	0.365392	3.41412e-06
CPXM1	0.365265	3.4428e-06
SMAD7	0.365204	3.45678e-06
DNAJB6	0.365081	3.48492e-06
MCAM	0.365046	3.49306e-06
CFL2	0.364831	3.54298e-06
LILRB4	0.36478	3.55509e-06
KLHL5	0.36468	3.57855e-06
COL6A1	0.364592	3.59953e-06
NID1	0.364452	3.63285e-06
CEBPB	0.364046	3.7313e-06
COLGALT1	0.363893	3.76912e-06
TMEM45A	0.363886	3.77091e-06
HS3ST3A1	0.363416	3.88937e-06
PLSCR4	0.363396	3.89441e-06
CORO1C	0.363155	3.95677e-06
STAT3	0.362966	4.0062e-06
PAM	0.362945	4.01154e-06
FAM13C	0.362616	4.09922e-06
IGF1R	0.361774	4.33162e-06
SPHK1	0.361769	4.33295e-06
ERRFI1	0.361764	4.33443e-06
COPZ2	0.361719	4.34712e-06
IGDCC4	0.361633	4.37151e-06
TTC7B	0.361591	4.38351e-06
AFAP1	0.361561	4.39234e-06
COL11A1	0.361501	4.40939e-06
GYPC	0.361379	4.44462e-06
CD93	0.361312	4.46418e-06
NEXN	0.361162	4.50829e-06
EPDR1	0.361049	4.54165e-06
RBMS3	0.360947	4.57185e-06
CTDSP2	0.36069	4.64896e-06
MYO9B	0.360651	4.6608e-06
WDR47	0.360542	4.69407e-06
HSPA13	0.360398	4.73834e-06
NFIL3	0.360361	4.74957e-06
PDLIM4	0.360345	4.75453e-06
RFTN2	0.360307	4.7664e-06
NPC2	0.360156	4.8134e-06
KLHDC8B	0.360155	4.81369e-06
MAP1B	0.359774	4.9344e-06
CAV2	0.359721	4.95146e-06
TNFSF13B	0.35972	4.95169e-06
GIMAP6	0.359531	5.01307e-06
ZFYVE1	0.359366	5.067e-06
ADAM19	0.359239	5.10882e-06
PODXL	0.359149	5.13854e-06
CERCAM	0.358987	5.19289e-06
MILR1	0.358949	5.20575e-06
MMRN2	0.358906	5.22013e-06
FGL2	0.358777	5.264e-06
NAT14	0.358757	5.27085e-06
SOX17	0.358755	5.27145e-06
KLF10	0.358134	5.4875e-06
AGPAT4	0.358088	5.50383e-06
MAGED2	0.357981	5.542e-06
RCBTB2	0.357937	5.55761e-06
SLC15A3	0.35791	5.56755e-06
RNF146	0.357855	5.58725e-06
PCDHB14	0.357767	5.61908e-06
TRPS1	0.357696	5.64488e-06
GPR68	0.357609	5.67645e-06
MSC	0.357602	5.67926e-06
THSD7A	0.357595	5.68165e-06
CLIC2	0.3575	5.71644e-06
ZNF234	0.357489	5.72069e-06
APH1B	0.357153	5.84599e-06
F2RL2	0.356727	6.00842e-06
IGF1	0.356652	6.03723e-06
ETS1	0.356582	6.06452e-06
CCL8	0.3565	6.09663e-06
FSCN1	0.356278	6.18408e-06
KDSR	0.355996	6.29686e-06
NINJ2	0.355755	6.39491e-06
MMP14	0.35573	6.4054e-06
FBLN5	0.355479	6.50885e-06
TLR2	0.355433	6.52815e-06
CHST1	0.355109	6.66479e-06
CAMSAP2	0.354968	6.72525e-06
UBE2E2	0.354842	6.77963e-06
TPST1	0.354802	6.79708e-06
SH3GLB1	0.354776	6.80824e-06
TRAPPC6B	0.354612	6.87982e-06
IRS1	0.354467	6.94371e-06
SHC4	0.354449	6.95171e-06
GNA12	0.354449	6.95186e-06
ANXA6	0.354244	7.04315e-06
CPED1	0.354243	7.04391e-06
L3MBTL3	0.3542	7.06289e-06
PHLDA3	0.354163	7.07979e-06
GLI3	0.354115	7.10164e-06
ZFP90	0.354039	7.13588e-06
MOB1B	0.353951	7.17591e-06
ACTN1	0.353872	7.21222e-06
STK10	0.353861	7.21749e-06
PDE3A	0.353857	7.21899e-06
RAP1B	0.35348	7.39437e-06
MERTK	0.353396	7.43375e-06
SGPP1	0.353365	7.44855e-06
CCDC50	0.353101	7.5745e-06
EXT2	0.353049	7.59972e-06
DCHS1	0.352986	7.62988e-06
MAN2B1	0.35294	7.65239e-06
LRRK2	0.352892	7.67561e-06
EPS15	0.352611	7.81393e-06
GIT2	0.352601	7.81898e-06
EXTL2	0.352571	7.83355e-06
CTSO	0.352171	8.03441e-06
NPL	0.352164	8.03814e-06
AOC3	0.352022	8.11075e-06
L3HYPDH	0.35189	8.17854e-06
LCP2	0.351866	8.19134e-06
FAT4	0.351764	8.24443e-06
ADCY7	0.351447	8.41076e-06
HTR2B	0.351411	8.43028e-06
ZNF281	0.351092	8.60167e-06
PLOD2	0.350953	8.67703e-06
ZBTB4	0.350946	8.6812e-06
ZNF225	0.350805	8.75845e-06
PNRC1	0.350547	8.90196e-06
HAVCR2	0.350537	8.90776e-06
WDR45	0.350506	8.92485e-06
WNT5A	0.350467	8.94675e-06
ANKDD1A	0.350314	9.03336e-06
CAMK1D	0.350054	9.18252e-06
PTGFR	0.349893	9.27549e-06
RGS19	0.349618	9.4371e-06
GABARAPL1	0.349586	9.45615e-06
RHOJ	0.349529	9.48999e-06
SLFN11	0.349499	9.50779e-06
MYL9	0.349307	9.62327e-06
FRZB	0.349183	9.69801e-06
APOC1	0.349115	9.73976e-06
TAGLN	0.348756	9.96122e-06
PEAK1	0.348543	1.00945e-05
NPR2	0.348525	1.01061e-05
ADAMTS5	0.348141	1.03516e-05
RTN2	0.348124	1.03621e-05
PHPT1	0.348095	1.03808e-05
EHD2	0.348022	1.04287e-05
SRGN	0.347755	1.0604e-05
APELA	0.347618	1.06948e-05
MFSD1	0.347553	1.0738e-05
GNAI2	0.347281	1.09217e-05
TMEM140	0.34725	1.09423e-05
TMTC3	0.347001	1.11137e-05
ZNF222	0.346952	1.11473e-05
SACS	0.346939	1.11561e-05
ZNF548	0.346703	1.13216e-05
ORAI3	0.346289	1.1616e-05
NINJ1	0.346224	1.16631e-05
ECM1	0.346173	1.17002e-05
PRICKLE2	0.346134	1.17284e-05
TCP11L1	0.346025	1.18075e-05
TWIST2	0.345909	1.18927e-05
AMOTL2	0.345709	1.20413e-05
WDR26	0.345592	1.21288e-05
SPIRE1	0.345424	1.22555e-05
SLC31A2	0.345349	1.23125e-05
PDZRN3	0.345109	1.24967e-05
FAM167B	0.345094	1.25081e-05
FGF2	0.344609	1.28886e-05
AKAP12	0.344582	1.29101e-05
CCR2	0.344558	1.29288e-05
ECSCR	0.344426	1.30344e-05
CCDC3	0.34442	1.30397e-05
PABPC4L	0.344344	1.31004e-05
SMARCA1	0.344251	1.3176e-05
ZNF25	0.344083	1.33134e-05
TNFSF11	0.344013	1.33707e-05
LAMP1	0.343987	1.33923e-05
CYLD	0.343774	1.35687e-05
DRAM1	0.343702	1.36287e-05
ARMC9	0.343361	1.39171e-05
SHISA4	0.343287	1.39807e-05
ARMCX2	0.343232	1.40285e-05
FGD5	0.343231	1.40288e-05
PMEPA1	0.343081	1.41586e-05
RCSD1	0.343052	1.41842e-05
POSTN	0.342978	1.42483e-05
CPXM2	0.342192	1.49515e-05
THBS3	0.34203	1.51006e-05
HCLS1	0.341986	1.5141e-05
GNB4	0.341969	1.51569e-05
SYNC	0.341874	1.52452e-05
ITGB1	0.341846	1.52709e-05
RAB3GAP1	0.341701	1.54071e-05
OPTN	0.341655	1.54501e-05
KCNJ2	0.341492	1.56051e-05
GUCY1A2	0.341483	1.56137e-05
FTL	0.341291	1.57973e-05
MID2	0.340905	1.61732e-05
PLEKHM2	0.340747	1.63299e-05
CPQ	0.340745	1.63319e-05
SLC1A3	0.340517	1.65602e-05
IL10RA	0.340234	1.68477e-05
PAPLN	0.340142	1.69415e-05
EPC2	0.340126	1.6958e-05
PKIG	0.340054	1.70331e-05
IAH1	0.339787	1.73109e-05
PPP1R14A	0.339642	1.74643e-05
PI4K2A	0.339463	1.76544e-05
SLCO2B1	0.339334	1.77933e-05
HOOK3	0.339256	1.78771e-05
MYCT1	0.339113	1.80324e-05
TCEAL4	0.338737	1.84478e-05
BLOC1S6	0.338633	1.85643e-05
THEMIS2	0.33863	1.85677e-05
CREBL2	0.338509	1.87037e-05
SMIM10	0.338219	1.90343e-05
ARHGEF17	0.338159	1.91029e-05
FLT1	0.338062	1.92147e-05
SLC16A4	0.33803	1.92522e-05
IL3RA	0.337995	1.92928e-05
PLCL1	0.337929	1.93695e-05
HSD17B14	0.337696	1.96434e-05
CRYAB	0.337434	1.99555e-05
DDAH2	0.337069	2.03993e-05
ATP6V1B2	0.33694	2.05578e-05
LAMB2	0.336912	2.05929e-05
TSPYL4	0.336878	2.06344e-05
VSTM4	0.336567	2.10239e-05
NAP1L1	0.336359	2.12878e-05
KLHL21	0.336333	2.13207e-05
PTTG1IP	0.33619	2.15035e-05
FCGR3B	0.336038	2.17008e-05
MAP1LC3B	0.336029	2.17122e-05
AVEN	0.335851	2.19449e-05
SLC39A10	0.335724	2.21123e-05
TCN2	0.335693	2.21536e-05
NCKAP1L	0.335618	2.22538e-05
IGFBP5	0.335578	2.23061e-05
BTBD19	0.335481	2.24362e-05
CNTN4	0.33543	2.25045e-05
PRSS23	0.335423	2.25142e-05
ZMAT3	0.335376	2.25776e-05
FAM114A2	0.33513	2.29123e-05
EPHA4	0.335066	2.2999e-05
RNF169	0.335055	2.3015e-05
USP51	0.335034	2.30434e-05
PLK2	0.334975	2.31252e-05
ABCA6	0.334853	2.32942e-05
KCTD15	0.334828	2.33281e-05
B3GNT9	0.334589	2.36629e-05
CLEC14A	0.334496	2.37953e-05
WWC3	0.334494	2.37978e-05
ACOT9	0.334426	2.38946e-05
ITIH3	0.334388	2.3948e-05
LTC4S	0.334344	2.40117e-05
CRK	0.333924	2.4619e-05
FMO2	0.333876	2.46893e-05
ACTR1A	0.333777	2.48352e-05
CCDC92	0.33372	2.49189e-05
ARL15	0.333642	2.5035e-05
ELN	0.333489	2.52634e-05
NABP1	0.332877	2.61973e-05
ERCC1	0.332827	2.62751e-05
MCTP1	0.332768	2.63665e-05
TM2D1	0.332732	2.6423e-05
CCL26	0.332721	2.64397e-05
TBXAS1	0.332695	2.64818e-05
CDYL	0.332625	2.65914e-05
TCTN3	0.332542	2.67215e-05
CFLAR	0.332503	2.67843e-05
GJA5	0.332366	2.70011e-05
RASGRF2	0.332252	2.71841e-05
EVL	0.332191	2.72822e-05
EMCN	0.332002	2.75885e-05
ARL8B	0.331972	2.76373e-05
BHMT2	0.331798	2.79232e-05
GNA13	0.331336	2.8695e-05
TLE3	0.331329	2.87064e-05
DUSP14	0.331317	2.87275e-05
MFAP4	0.331254	2.88342e-05
KATNAL1	0.331196	2.89326e-05
SPON1	0.331188	2.89465e-05
KDR	0.330952	2.93511e-05
BMPR2	0.330811	2.95953e-05
GM2A	0.330201	3.06761e-05
KIF1B	0.330112	3.08363e-05
STX11	0.329953	3.11255e-05
SSPN	0.329918	3.11891e-05
DOK6	0.329769	3.14634e-05
CARD8	0.3297	3.15899e-05
PDLIM7	0.3296	3.17763e-05
EPHA3	0.329572	3.18285e-05
RGS10	0.329317	3.23058e-05
CAV1	0.329049	3.28164e-05
HSPG2	0.32903	3.28529e-05
BATF3	0.328789	3.33184e-05
NAIP	0.328653	3.35858e-05
DOCK11	0.328573	3.37415e-05
RSPO3	0.328454	3.3977e-05
MEOX1	0.32837	3.41439e-05
FMNL2	0.328357	3.41703e-05
SLC16A6	0.328297	3.42893e-05
INMT	0.328236	3.44128e-05
CCDC71L	0.328084	3.47178e-05
APLP2	0.328076	3.47343e-05
FPR1	0.327916	3.50606e-05
LAMA4	0.32787	3.51528e-05
CHIC2	0.327837	3.52218e-05
PIGK	0.327423	3.60807e-05
ARL16	0.327314	3.63089e-05
GNG10	0.327253	3.64381e-05
C1orf198	0.327205	3.65396e-05
DBN1	0.327143	3.66723e-05
SCARB2	0.326969	3.70441e-05
SVIL	0.326905	3.71819e-05
SNAI1	0.326837	3.73298e-05
WTAP	0.326772	3.74707e-05
HGF	0.326566	3.79197e-05
NR1H2	0.326488	3.80924e-05
STX2	0.326327	3.8448e-05
ZNF260	0.326106	3.89435e-05
SERPINI1	0.325971	3.92503e-05
TUSC3	0.325791	3.96602e-05
LRRN4CL	0.325586	4.01325e-05
CCDC69	0.325042	4.14115e-05
HES4	0.324935	4.16683e-05
PITPNA	0.324842	4.18915e-05
FOXF1	0.324311	4.31924e-05
GPR183	0.324221	4.34175e-05
NCK1	0.324096	4.37299e-05
BAG2	0.324017	4.39283e-05
ZBTB47	0.323976	4.40311e-05
SEC22B	0.323953	4.40913e-05
COMP	0.323857	4.43349e-05
IER5L	0.323844	4.43661e-05
CCDC102B	0.323827	4.44102e-05
BOC	0.3238	4.44783e-05
COL16A1	0.323788	4.45095e-05
NUCB1	0.323686	4.4771e-05
FBLN1	0.323608	4.49724e-05
PHLDA1	0.323553	4.51148e-05
UBE2B	0.323534	4.51625e-05
GPCPD1	0.323394	4.55282e-05
HSPA6	0.323352	4.56369e-05
ANKRD50	0.323221	4.59803e-05
HCFC2	0.323182	4.60843e-05
MAPK1	0.323176	4.60989e-05
CYTL1	0.323144	4.6184e-05
THBS4	0.323095	4.63145e-05
CEBPD	0.323006	4.655e-05
LRP12	0.322975	4.66321e-05
PLS3	0.322912	4.68012e-05
GBP2	0.322798	4.71064e-05
CSRNP2	0.322715	4.73309e-05
SHISA2	0.322615	4.7602e-05
BMP2K	0.322309	4.84416e-05
TNFRSF1A	0.322292	4.84906e-05
ACTA2	0.322137	4.89216e-05
PRNP	0.321996	4.9316e-05
HSPB2	0.321886	4.96249e-05
FBXO32	0.321856	4.971e-05
MB21D2	0.321713	5.01184e-05
HYAL2	0.321657	5.02775e-05
ARHGAP30	0.321619	5.03858e-05
SAMHD1	0.32127	5.13989e-05
PCDH12	0.321259	5.1429e-05
RUFY3	0.321249	5.14596e-05
SRPX	0.321176	5.16747e-05
PLXND1	0.32097	5.2282e-05
CRTC3	0.320766	5.28922e-05
CST2	0.320701	5.30873e-05
LITAF	0.320681	5.31466e-05
C1orf122	0.320493	5.37195e-05
NRK	0.3202	5.46181e-05
MAP7D3	0.320162	5.47345e-05
MTMR6	0.320104	5.49172e-05
MYOF	0.320057	5.50637e-05
LPAR6	0.32005	5.50856e-05
WBP1L	0.320007	5.52172e-05
ARIH1	0.319936	5.54417e-05
ATP2B4	0.319809	5.58406e-05
STC1	0.319779	5.59353e-05
PDE4DIP	0.319706	5.61683e-05
RNF217	0.319563	5.66247e-05
FXYD5	0.319388	5.71862e-05
SEC62	0.319356	5.72908e-05
CMKLR1	0.319316	5.74194e-05
CREBRF	0.319303	5.74609e-05
RAPGEF1	0.319293	5.74936e-05
NAB2	0.319023	5.83769e-05
SLC43A2	0.318988	5.84919e-05
ADAM12	0.318984	5.85063e-05
MICAL2	0.318921	5.87144e-05
PALLD	0.31872	5.93857e-05
TRAPPC1	0.318502	6.01173e-05
PIP4K2A	0.318459	6.02635e-05
ALDH1L2	0.318316	6.07529e-05
CDO1	0.318314	6.07577e-05
RRAGC	0.318301	6.08043e-05
SLC35B4	0.318238	6.1019e-05
LILRB1	0.318235	6.1028e-05
SPP1	0.318182	6.12103e-05
PODN	0.318173	6.12436e-05
HOXD8	0.318105	6.14782e-05
PAG1	0.318045	6.1687e-05
KIF3C	0.317983	6.18998e-05
RAB2B	0.317541	6.34575e-05
ITPRIPL2	0.317249	6.4506e-05
BCAT1	0.317249	6.45065e-05
GBE1	0.317233	6.45649e-05
PRMT2	0.317033	6.52907e-05
ZC2HC1A	0.316994	6.54348e-05
NR3C1	0.316967	6.55356e-05
RUNX1T1	0.316809	6.61187e-05
SLFN12	0.316781	6.62203e-05
VMO1	0.316582	6.69608e-05
SH3PXD2B	0.316198	6.84159e-05
PTHLH	0.315945	6.93882e-05
CYYR1	0.315531	7.1012e-05
CHST15	0.315502	7.11261e-05
UBLCP1	0.31531	7.18901e-05
RTN1	0.315127	7.2626e-05
IFITM2	0.315094	7.27625e-05
CLIP3	0.315047	7.29507e-05
RNF11	0.314909	7.35126e-05
CXCR4	0.314748	7.41765e-05
YIPF5	0.314669	7.4501e-05
ZYG11B	0.314617	7.47193e-05
ARHGDIB	0.31454	7.50377e-05
FZD1	0.31453	7.50778e-05
TNFAIP8L2	0.314501	7.5199e-05
CXCL12	0.314463	7.5359e-05
SCARF1	0.314301	7.60413e-05
TMOD2	0.314271	7.61659e-05
WWTR1	0.314062	7.70569e-05
DYSF	0.313895	7.77711e-05
KCTD11	0.313818	7.81072e-05
SOCS3	0.313817	7.81091e-05
RANBP6	0.313721	7.85262e-05
HOXA4	0.313678	7.87151e-05
WLS	0.313494	7.95194e-05
VGLL4	0.313469	7.96288e-05
PARVA	0.313448	7.97214e-05
JUNB	0.313329	8.0249e-05
SOX18	0.313181	8.091e-05
DOCK2	0.313157	8.10154e-05
SSH1	0.313129	8.11405e-05
THSD7B	0.312975	8.18353e-05
ZNF677	0.312759	8.28162e-05
SPARCL1	0.312753	8.28445e-05
MAP3K3	0.312714	8.30212e-05
TRIM22	0.312674	8.32064e-05
CHST3	0.312615	8.34764e-05
CRIP2	0.312501	8.40038e-05
LARP6	0.312468	8.41594e-05
TMEM255A	0.312453	8.42265e-05
PIK3CD	0.312345	8.47287e-05
ITGA1	0.312312	8.48847e-05
HCST	0.312069	8.60302e-05
CBX1	0.31194	8.66392e-05
GYG1	0.311929	8.66931e-05
TRAM2	0.31189	8.68795e-05
GMFG	0.311442	8.90494e-05
AFAP1L1	0.311436	8.90743e-05
PJA2	0.311342	8.95382e-05
IRF2BPL	0.311191	9.02849e-05
RIT1	0.310597	9.32716e-05
AKIRIN2	0.310564	9.34407e-05
CBX6	0.310261	9.5005e-05
MCOLN1	0.31016	9.55314e-05
ANKH	0.310102	9.58368e-05
TBC1D9	0.310029	9.6216e-05
GLI2	0.310009	9.6321e-05
TMEM121	0.309901	9.68917e-05
WNT2B	0.309632	9.83278e-05
TRIM6	0.309562	9.87025e-05
IL6ST	0.309365	9.97711e-05
GIMAP7	0.309355	9.98238e-05
PNMA1	0.309083	0.000101314
PRKG1	0.309055	0.000101473
CD34	0.309013	0.000101705
RGS4	0.308966	0.000101964
ACVRL1	0.308748	0.000103184
PTPN12	0.308726	0.000103308
NT5C2	0.308436	0.000104945
YAP1	0.308393	0.000105195
FILIP1	0.308382	0.000105254
C14orf132	0.308355	0.000105409
MEGF8	0.308212	0.000106232
NR2F1	0.308081	0.000106993
OSMR	0.308043	0.00010721
SGCE	0.307715	0.000109136
EGR3	0.307469	0.000110601
TPST2	0.307451	0.000110712
P2RY6	0.307429	0.000110844
PTEN	0.307272	0.000111786
C1RL	0.307233	0.000112027
LPAR4	0.307059	0.000113085
GAB2	0.306954	0.000113727
PBX3	0.306932	0.000113861
RNASE2	0.306611	0.000115859
NPEPPS	0.306542	0.00011629
SERPINE2	0.306427	0.000117013
CGGBP1	0.306419	0.000117067
ARID4A	0.306385	0.000117278
BLVRA	0.306372	0.000117364
GID4	0.306321	0.000117687
BPGM	0.306301	0.000117812
VMP1	0.306204	0.000118427
CSF2RB	0.306138	0.000118852
KLF11	0.306081	0.000119216
PRDM6	0.30593	0.000120192
CPE	0.305797	0.000121055
INPP4A	0.305723	0.000121541
NATD1	0.305647	0.000122039
IL17D	0.305393	0.000123718
STOM	0.305204	0.000124983
ACTR10	0.305083	0.000125794
AP2A2	0.304906	0.000126995
MORF4L1	0.304838	0.000127461
S1PR3	0.304792	0.000127775
CHST12	0.304751	0.00012806
FAM216A	0.304714	0.000128309
BBS10	0.304631	0.000128887
PTPRC	0.304581	0.000129232
NALCN	0.304576	0.000129263
MEOX2	0.304546	0.000129476
PDLIM3	0.304532	0.000129571
RGS7BP	0.304531	0.000129578
GABARAP	0.304487	0.00012988
CEP19	0.30447	0.000130002
TMX3	0.304434	0.000130253
P4HA3	0.304318	0.000131065
NEDD4	0.304285	0.000131296
ZBTB10	0.304246	0.000131571
AGO4	0.304241	0.000131604
MEDAG	0.304146	0.000132278
GHR	0.304069	0.000132821
EVI2B	0.303378	0.000137824
ANTXR2	0.303295	0.00013843
BNIP3L	0.303244	0.000138811
SFXN3	0.303174	0.000139327
RICTOR	0.303104	0.000139852
VWF	0.302792	0.000142198
SFMBT2	0.302746	0.000142545
CCDC127	0.302626	0.000143463
PNMA2	0.302539	0.000144122
FEZ1	0.302412	0.0001451
CYSLTR1	0.302205	0.000146706
TPBG	0.302173	0.000146954
FBXL2	0.302099	0.000147536
ELL	0.301823	0.000149717
CSNK2A2	0.301763	0.000150191
CCL4	0.301694	0.000150749
ALOX5AP	0.3016	0.000151499
SEC14L1	0.301418	0.00015297
CX3CR1	0.301387	0.000153221
TTC28	0.301385	0.000153238
ARL2	0.301282	0.000154077
TMEM184B	0.301261	0.000154246
ITGAX	0.301163	0.000155052
LLPH	0.301054	0.000155949
RHOBTB3	0.301008	0.000156326
MAP3K7	0.300917	0.000157084
RECQL	0.300881	0.000157384
EID2B	0.300862	0.000157541
ADAMTS1	0.300831	0.000157794
CD300LF	0.300817	0.000157912
CUEDC2	0.30061	0.000159655
EID3	0.300558	0.000160095
PIM1	0.300449	0.000161018
NAGA	0.300298	0.000162303
TBC1D12	0.300224	0.000162941
PROCR	0.299957	0.000165253
CREG1	0.299949	0.000165321
PTGFRN	0.299726	0.000167276
CAP1	0.299592	0.000168461
ASAH1	0.299581	0.000168562
HSPA2	0.299563	0.000168715
VAV1	0.299541	0.000168912
TTYH2	0.299534	0.000168975
TRPC6	0.299532	0.000168993
SOX7	0.299325	0.000170844
ARAP1	0.299291	0.000171152
CDKN2B	0.29928	0.000171248
ZFHX4	0.299195	0.000172014
RALGDS	0.299195	0.000172018
TRABD2B	0.299133	0.00017258
DLL1	0.2989	0.000174701
EBF1	0.298893	0.000174765
LACC1	0.298842	0.000175235
OGFRL1	0.298839	0.00017527
ZFAND3	0.298569	0.000177767
STK38L	0.298542	0.000178023
PI15	0.298532	0.000178116
ZSWIM7	0.298468	0.000178708
GNAL	0.298441	0.000178961
CDK2AP1	0.298401	0.000179336
TOR1A	0.298339	0.000179922
GNPTG	0.298089	0.000182294
PRAF2	0.298064	0.000182535
S1PR1	0.297756	0.000185505
MMP19	0.297489	0.000188111
CD44	0.297274	0.000190234
DRAP1	0.297087	0.000192099
TGFB3	0.296892	0.000194068
ZNF284	0.296892	0.000194069
ATL1	0.296795	0.000195054
CTNNAL1	0.296788	0.000195116
PLVAP	0.296745	0.000195559
WTIP	0.296636	0.000196672
APLNR	0.296571	0.000197337
KPNA4	0.296451	0.000198577
PCSK5	0.296384	0.000199266
TMEM245	0.296135	0.000201866
SLA	0.296125	0.00020197
CAP2	0.296092	0.000202317
PRCP	0.295889	0.000204468
TMEM204	0.295884	0.000204516
RERG	0.295822	0.000205178
STARD8	0.295672	0.000206789
PRKAR2B	0.295612	0.000207428
F13A1	0.295539	0.000208213
DNAJB4	0.295255	0.000211308
CCR5	0.295239	0.000211479
NIPSNAP3B	0.295121	0.000212781
GPX1	0.294666	0.000217851
DNAJC18	0.294608	0.000218507
ZNF581	0.294018	0.000225269
ZFP82	0.294003	0.000225438
SMOC2	0.293946	0.000226111
P2RY13	0.293629	0.000229837
ZBTB34	0.29332	0.00023352
IRAK4	0.293297	0.000233796
PJA1	0.293245	0.000234424
OPA3	0.29309	0.000236303
ANKRD35	0.293088	0.00023632
CYP2U1	0.292976	0.000237689
FBXW2	0.292838	0.000239384
CHL1	0.29276	0.000240336
HS3ST3B1	0.292735	0.000240644
C3orf38	0.292731	0.000240698
SCPEP1	0.292702	0.000241054
SSC5D	0.292699	0.000241098
DEF8	0.29248	0.000243817
CD72	0.292439	0.000244337
GLRB	0.292369	0.000245216
PCDH7	0.292217	0.000247131
PRDM1	0.291999	0.000249905
HTR2A	0.291945	0.000250602
SOD2	0.291691	0.000253877
FAM13B	0.29165	0.000254413
PCED1B	0.291608	0.000254957
TNC	0.291138	0.000261155
PEG3	0.291125	0.000261338
ZNF226	0.29105	0.00026234
SLFN5	0.291024	0.000262688
EMP1	0.290921	0.00026407
ACP5	0.290667	0.000267508
PLEK	0.290591	0.000268546
PLN	0.290591	0.000268551
PREX1	0.290538	0.000269273
CCDC8	0.290347	0.000271905
HOXB2	0.290268	0.000272999
CREB1	0.290188	0.000274116
ZNF430	0.290187	0.000274127
PPP3CC	0.289938	0.000277629
LAMP2	0.28967	0.000281435
BARX1	0.289589	0.000282594
RLIM	0.289584	0.000282663
KCND2	0.289579	0.000282742
ARHGAP25	0.289466	0.000284361
ZNF227	0.289321	0.000286459
LDLRAD3	0.289266	0.000287257
MAN1C1	0.289257	0.000287388
TCEA2	0.289153	0.000288911
IL6	0.28901	0.00029101
RB1CC1	0.288682	0.00029589
CUX1	0.288645	0.000296437
ARF3	0.288633	0.000296627
FBXO17	0.288564	0.000297657
VTI1B	0.288435	0.000299606
DKK2	0.288349	0.000300912
SLC39A6	0.288211	0.000303025
MAF	0.288158	0.000303827
BHLHE22	0.28793	0.000307356
SPI1	0.287885	0.000308043
TMSB4X	0.28787	0.000308285
ST3GAL6	0.28778	0.000309682
AP4S1	0.287741	0.000310294
PPM1F	0.287423	0.000315309
SLC9A9	0.28728	0.000317592
ITPR2	0.287241	0.000318213
DSTYK	0.287213	0.000318664
HS3ST2	0.287049	0.000321306
RANBP9	0.286987	0.000322306
PDE4B	0.286975	0.000322496
ZNF580	0.286956	0.000322809
CD63	0.286856	0.000324424
RNF166	0.286661	0.000327619
MEIS1	0.286489	0.000330473
PELO	0.286446	0.000331181
MTMR9	0.286412	0.000331747
SOAT1	0.286246	0.000334521
NXPE3	0.286238	0.000334656
WASF1	0.286026	0.000338238
ITGA5	0.285982	0.000338979
C11orf95	0.285877	0.000340758
SIX5	0.285824	0.000341667
SEC31A	0.28582	0.000341738
FAS	0.285804	0.000342021
CCL18	0.28574	0.000343116
C12orf57	0.285653	0.000344617
SPRY4	0.2856	0.000345525
HIGD1B	0.285592	0.00034567
DCLK1	0.285342	0.000350018
PGBD1	0.285054	0.000355078
FAM168A	0.285008	0.000355895
ZBTB46	0.284948	0.000356968
RAB9A	0.284881	0.000358167
GNAI3	0.284675	0.00036187
MAP4K5	0.284611	0.000363011
IL4I1	0.28461	0.00036303
FBXO30	0.28453	0.000364486
FNBP1	0.284367	0.000367465
GIMAP2	0.284257	0.000369472
FKBP10	0.284224	0.000370093
MTMR2	0.284089	0.000372585
MBD5	0.283734	0.00037921
BOD1	0.28362	0.000381359
RAI2	0.283528	0.00038311
UVRAG	0.283517	0.000383318
CILP	0.28338	0.00038593
RABEP1	0.283377	0.000385999
DUSP10	0.283339	0.000386723
LTBP3	0.283162	0.000390129
KIAA1586	0.283024	0.00039282
RAB30	0.282956	0.000394134
CSPG4	0.282925	0.00039475
ADPRH	0.282883	0.000395561
ANO6	0.282836	0.000396487
DOCK8	0.282831	0.000396584
GALNT2	0.282775	0.00039769
FCN1	0.28276	0.000397986
AGPS	0.282502	0.00040309
VEZF1	0.282438	0.000404378
YAF2	0.282408	0.000404971
PAIP2	0.282389	0.00040536
GALNT15	0.282153	0.00041012
ADAMDEC1	0.282041	0.00041238
ZNF23	0.282033	0.000412547
BHLHE40	0.281971	0.000413814
PSTPIP1	0.281872	0.000415849
HOXA5	0.281818	0.000416952
SORBS3	0.281596	0.000421533
SGCB	0.281555	0.000422387
ESAM	0.281554	0.000422407
FCGRT	0.281348	0.000426719
PEAR1	0.281346	0.000426764
GIMAP1	0.281266	0.000428447
ZNF667	0.281263	0.000428512
PROS1	0.280967	0.000434798
FAM110B	0.280396	0.000447174
OSBPL9	0.2803	0.000449272
UNC5B	0.280276	0.00044981
SPRY1	0.280021	0.000455478
GNAI1	0.279995	0.000456042
TCF21	0.279972	0.000456573
TBC1D19	0.279963	0.000456766
EGR1	0.279898	0.00045822
GPR161	0.279784	0.000460782
FAM160B1	0.27976	0.000461332
PIP5K1C	0.279732	0.00046196
BCHE	0.2796	0.000464961
ARSI	0.279513	0.000466936
AMOTL1	0.2794	0.000469523
MAP1S	0.279331	0.000471123
RBMS2	0.279218	0.000473717
SPATA7	0.279177	0.000474663
NPTX2	0.279176	0.000474684
AMPH	0.279086	0.000476791
IFNAR2	0.279079	0.000476946
EXOC2	0.279055	0.000477501
CDK17	0.278976	0.000479363
RBPMS	0.278824	0.000482913
ZBTB8A	0.27879	0.000483728
ZNF267	0.278589	0.000488491
CHRDL2	0.278543	0.000489579
HEXB	0.27852	0.00049014
RNF180	0.278462	0.000491515
CYBRD1	0.278394	0.000493156
OGFOD1	0.278296	0.000495503
RABAC1	0.278146	0.000499153
GLG1	0.277985	0.000503068
RND3	0.27797	0.000503428
FAM229B	0.277933	0.00050435
TMEM185A	0.277924	0.000504558
DOK2	0.277894	0.00050529
NAPA	0.277885	0.000505524
CPEB4	0.277784	0.000508001
DCBLD1	0.277766	0.000508449
CLDN11	0.277743	0.000509019
ITM2B	0.277724	0.000509481
CACNA2D1	0.277719	0.000509605
GAA	0.277653	0.000511239
SPECC1L	0.27762	0.000512069
DIP2C	0.277432	0.000516757
CNPY4	0.27731	0.000519837
SH3PXD2A	0.277253	0.00052127
ZBTB2	0.277207	0.000522433
CLIP4	0.277137	0.000524222
RAB42	0.276871	0.000531022
WDR82	0.276829	0.000532092
IFITM3	0.276737	0.000534467
MITF	0.276489	0.000540937
CACNA2D3	0.276433	0.000542382
FKBP9	0.276322	0.000545311
TRAM1	0.27631	0.000545625
RGL1	0.276198	0.000548587
CFH	0.276171	0.000549294
MEF2A	0.276168	0.000549371
EID1	0.276035	0.000552912
KCTD12	0.275971	0.000554634
TMEM30A	0.275914	0.000556167
DIRAS3	0.275798	0.00055929
SORCS2	0.275617	0.000564186
ITIH5	0.275609	0.000564402
OGN	0.275446	0.000568861
PFDN5	0.275373	0.000570858
CLN5	0.275231	0.000574761
MYO1F	0.275211	0.000575335
IFNAR1	0.274997	0.000581282
DACT3	0.274966	0.000582139
TNFAIP8	0.274898	0.000584052
FSD1L	0.274884	0.000584448
TRMT112	0.274703	0.000589564
TNFRSF1B	0.274694	0.000589811
C8orf88	0.274675	0.000590348
LSP1	0.274651	0.000591016
RWDD1	0.274474	0.000596063
ZNF404	0.274343	0.00059983
GNB5	0.274141	0.000605655
LDOC1	0.274038	0.00060867
RAMP3	0.27379	0.000615926
IGF2R	0.273776	0.000616346
ZDHHC15	0.27366	0.000619795
GNB1	0.273557	0.000622848
NRP2	0.273445	0.000626183
WSB1	0.273442	0.000626277
ROBO4	0.273426	0.000626747
SKIL	0.273384	0.000628007
C2CD2	0.273301	0.000630506
SNAPC1	0.273228	0.000632716
CYBB	0.273066	0.000637633
STAB1	0.272982	0.000640197
UBE2D1	0.272979	0.000640294
RELB	0.272862	0.000643869
XRN2	0.272763	0.000646928
ALG9	0.27271	0.000648548
TCF7L1	0.272678	0.000649541
TM4SF18	0.272618	0.000651391
BTAF1	0.272522	0.000654407
FADS3	0.272488	0.000655448
PHC1	0.272487	0.000655481
CD83	0.272411	0.000657858
CNN1	0.27229	0.000661652
TRPV2	0.27225	0.000662934
GBP1	0.272171	0.000665431
RHOG	0.27204	0.000669588
DAAM2	0.272011	0.000670517
ZNF112	0.271979	0.000671533
NDUFAF7	0.27196	0.000672136
TNS1	0.271916	0.000673537
DNM1	0.271808	0.000677011
AMPD3	0.271797	0.000677373
SCN1B	0.271631	0.000682709
NEGR1	0.271555	0.000685203
C1QTNF2	0.27148	0.000687645
FAM219A	0.271473	0.000687868
KLF7	0.27128	0.000694203
SREK1IP1	0.271248	0.000695248
HCFC1R1	0.271036	0.000702249
PNPLA8	0.270938	0.000705538
FGF7	0.270922	0.000706077
FZD4	0.270866	0.00070795
NUMBL	0.270842	0.000708751
FLI1	0.27077	0.000711152
ZFYVE26	0.270742	0.000712093
CLN8	0.270679	0.00071423
ICAM1	0.270609	0.000716595
ERGIC2	0.270601	0.000716863
ZNF45	0.270511	0.000719936
S100PBP	0.270456	0.00072181
RIMKLB	0.270298	0.000727224
AOAH	0.270295	0.000727331
ZNF426	0.270225	0.000729744
ITGA7	0.270136	0.000732808
ADPRM	0.270103	0.000733946
NCF4	0.270099	0.00073409
SERPINB9	0.269961	0.00073887
MAMLD1	0.269935	0.000739798
TRIM52	0.269879	0.000741736
ANGPT1	0.269801	0.000744489
PTAFR	0.269648	0.000749858
SHANK3	0.269627	0.000750601
SH3BGRL	0.269547	0.000753438
ZNF319	0.269534	0.000753901
DSEL	0.269532	0.000753986
HABP4	0.269222	0.000765063
[truncated: 14,410 more rows]

## Sheet: Supplement Table S7
Supplement Table S7: The result of CMap analysis.
[truncated: 1,289 more rows]
